# Supplementary material for: Characterizing the spatial distribution of coral reefs in the South-Central Coast region of Viet Nam using Planetscope imagery
Source: PeerJ. 2021 Nov 2;9:e12413. doi: 10.7717/peerj.12413 (PMC8570177; doi:10.7717/peerj.12413)
Supplement: Supplemental Information 1 [file peerj-09-12413-s001.xls]

## Sheet: Cu Lao Cham
Area	Site	Depth (m)	Bottom	X_Coordina	Y_Coordina
Cu Lao Cham	Bai Nan, Bai H??ng	5.5	Live coral	108.517159*	15.93767000*
Cu Lao Cham	Bai Bim	3.4	Live coral	108.515659*	15.93844000*
Cu Lao Cham	Bai Bim	2.5	Live coral	108.515619*	15.93841000*
Cu Lao Cham	Bai Bim	2.7	Live coral	108.515559*	15.93844000*
Cu Lao Cham	Bai Bim	2.3	Live coral	108.515489*	15.93843000*
Cu Lao Cham	Bai Bim	3	Live coral	108.515399*	15.93840000*
Cu Lao Cham	Bai Bim	2.1	Live coral	108.515309*	15.93840000*
Cu Lao Cham	Bai Bim	2.8	Live coral	108.515169*	15.93838000*
Cu Lao Cham	Bai Bim	2.6	Live coral	108.515079*	15.93833000*
Cu Lao Cham	Bai Bim	2.4	Live coral	108.514959*	15.93831000*
Cu Lao Cham	Bai Bim	2.2	Live coral	108.516909*	15.93865000*
Cu Lao Cham	Bai Bim	2.8	Live coral	108.515139*	15.93828000*
Cu Lao Cham	Bai Bim	3	Live coral	108.515309*	15.93833000*
	Bai Bim	3.2	Live coral	108.515479*	15.93835000*
Cu Lao Cham	Bai Bim	0.9	Live coral	108.516429*	15.93867000*
Cu Lao Cham	Bai Bim	1.9	Live coral	108.516079*	15.93850000*
Cu Lao Cham	Bai Bim	2.6	Live coral	108.515949*	15.93843000*
Cu Lao Cham	Bai Bim	2.8	Live coral	108.515719*	15.93841000*
Cu Lao Cham	Bai Bim	1	Live coral	108.516700*	15.93871342*
Cu Lao Cham	Bai Bim	1.1	Live coral	108.516749*	15.93874000*
Cu Lao Cham	Bai Bim	1.8	Live coral	108.516649*	15.93868000*
Cu Lao Cham	Bai Bim	1.2	Live coral	108.516649*	15.93873000*
Cu Lao Cham	Bai Bim	2.3	Live coral	108.516459*	15.93854000*
Cu Lao Cham	Bai Bim	2.8	Live coral	108.516499*	15.93850000*
Cu Lao Cham	Bai Bim	2.2	Live coral	108.516399*	15.93857000*
Cu Lao Cham	Bai Bim	2.1	Live coral	108.516186*	15.93846675*
Cu Lao Cham	Bai Bim	2.1	Live coral	108.516249*	15.93849000*
Cu Lao Cham	Bai Bim	3.2	Live coral	108.516229*	15.93843000*
Cu Lao Cham	Bai Bim	2.3	Live coral	108.516139*	15.93849000*
Cu Lao Cham	Bai Bim	2.5	Live coral	108.515849*	15.93845748*
Cu Lao Cham	Bai Bim	2.8	Live coral	108.515879*	15.93843000*
Cu Lao Cham	Bai Bim	1.8	Live coral	108.515839*	15.93844000*
Cu Lao Cham	Bai Huong	4.8	Live coral	108.530639*	15.92611000*
Cu Lao Cham	Bai Huong	4.2	Live coral	108.529969*	15.92772000*
Cu Lao Cham	Bai Huong	6.3	Live coral	108.529829*	15.92769000*
Cu Lao Cham	Bai Huong	5.2	Live coral	108.529849*	15.92797000*
Cu Lao Cham	Bai Huong	2.1	Live coral	108.530039*	15.92819000*
Cu Lao Cham	Bai Huong	1.8	Live coral	108.529889*	15.92826000*
Cu Lao Cham	Bai Huong	1.9	Live coral	108.529959*	15.92839000*
Cu Lao Cham	Bai Huong	4	Live coral	108.529719*	15.92846000*
Cu Lao Cham	Bai Huong	6.6	Live coral	108.529569*	15.92842000*
Cu Lao Cham	Bai Huong	2.8	Live coral	108.530479*	15.92634000*
Cu Lao Cham	Bai Huong	7.1	Live coral	108.529429*	15.92861000*
Cu Lao Cham	Bai Huong	3.4	Live coral	108.529399*	15.92912000*
Cu Lao Cham	Bai Huong	2.6	Live coral	108.529429*	15.92924000*
Cu Lao Cham	Bai Huong	2.2	Live coral	108.529459*	15.92937000*
Cu Lao Cham	Bai Huong	4.2	Live coral	108.530169*	15.92684000*
Cu Lao Cham	Bai Huong	6.1	Live coral	108.530059*	15.92688000*
Cu Lao Cham	Bai Huong	4.8	Live coral	108.530039*	15.92692000*
Cu Lao Cham	Bai Huong	2.1	Live coral	108.530239*	15.92707000*
Cu Lao Cham	Bai Huong	4	Live coral	108.530239*	15.92720000*
Cu Lao Cham	Bai Huong	1.7	Live coral	108.530239*	15.92739000*
Cu Lao Cham	Bai Huong	1.7	Live coral	108.530239*	15.92696989*
Cu Lao Cham	Bai Huong	2.3	Live coral	108.530289*	15.92694000*
Cu Lao Cham	Bai Huong	2.5	Live coral	108.530209*	15.92694000*
Cu Lao Cham	Bai Huong	2	Live coral	108.530199*	15.92700000*
Cu Lao Cham	Bai Huong	1.8	Live coral	108.530259*	15.92700000*
Cu Lao Cham	Bai Huong	2.5	Live coral	108.530120*	15.92696958*
Cu Lao Cham	Bai Huong	2.3	Live coral	108.530089*	15.92693930*
Cu Lao Cham	Bai Huong	2.8	Live coral	108.530079*	15.92700930*
Cu Lao Cham	Bai Huong	2.4	Live coral	108.530139*	15.92700930*
Cu Lao Cham	Bai Huong	2.6	Live coral	108.530039*	15.92771000*
Cu Lao Cham	Bai Huong	2.5	Live coral	108.530109*	15.92771000*
Cu Lao Cham	Bai Huong	3.4	Live coral	108.530039*	15.92765000*
Cu Lao Cham	Bai Huong	2.8	Live coral	108.530019*	15.92776000*
Cu Lao Cham	Bai Huong	3.1	Live coral	108.529999*	15.92809000*
Cu Lao Cham	Bai Huong	3.3	Live coral	108.529889*	15.92808000*
Cu Lao Cham	Bai Huong	0.9	Live coral	108.529939*	15.92804000*
Cu Lao Cham	Bai Huong	2.4	Live coral	108.529960*	15.92808966*
Cu Lao Cham	Bai Huong	2.8	Live coral	108.529979*	15.92812000*
Cu Lao Cham	Bai Huong	2.6	Live coral	108.529769*	15.92848000*
Cu Lao Cham	Bai Huong	3.3	Live coral	108.529789*	15.92844000*
Cu Lao Cham	Bai Huong	2.6	Live coral	108.529849*	15.92843000*
Cu Lao Cham	Bai Huong	3	Live coral	108.529569*	15.92895000*
Cu Lao Cham	Bai Huong	2.1	Live coral	108.529589*	15.92902000*
Cu Lao Cham	Bai Huong	2.4	Live coral	108.529389*	15.92949000*
Cu Lao Cham	Bai Huong	1.9	Live coral	108.529429*	15.92947000*
Cu Lao Cham	Bai Huong	2.3	Live coral	108.529399*	15.92951000*
Cu Lao Cham	Bai Huong	2.3	Live coral	108.529369*	15.92951000*
Cu Lao Cham	Bai Nan	2.5	Live coral	108.533049*	15.92444000*
Cu Lao Cham	Bai Nan	3	Live coral	108.532849*	15.92455000*
Cu Lao Cham	Bai Nan	4.8	Live coral	108.532479*	15.92467000*
Cu Lao Cham	Bai Nan	5.3	Live coral	108.532189*	15.92502000*
Cu Lao Cham	Bai Nan	4.4	Live coral	108.532309*	15.92506000*
Cu Lao Cham	Bai Nan	2	Live coral	108.532269*	15.92544000*
Cu Lao Cham	Bai Nan	1.9	Live coral	108.533629*	15.92373000*
Cu Lao Cham	Bai Nan	2.4	Live coral	108.532169*	15.92546000*
Cu Lao Cham	Bai Nan	5.1	Live coral	108.531649*	15.92530000*
Cu Lao Cham	Bai Nan	4.5	Live coral	108.531499*	15.92545000*
Cu Lao Cham	Bai Nan	4.2	Live coral	108.531329*	15.92553000*
Cu Lao Cham	Bai Nan	3.8	Live coral	108.530999*	15.92560000*
Cu Lao Cham	Bai Nan	5.6	Live coral	108.533109*	15.92383000*
Cu Lao Cham	Bai Nan	1.9	Live coral	108.533259*	15.92434000*
Cu Lao Cham	Bai Nan	2.2	Live coral	108.533169*	15.92443000*
Cu Lao Cham	Bai Nan	2.6	Live coral	108.533539*	15.92362000*
Cu Lao Cham	Bai Nan	2.4	Live coral	108.533549*	15.92354000*
Cu Lao Cham	Bai Nan	2.5	Live coral	108.533629*	15.92360000*
Cu Lao Cham	Bai Nan	3	Live coral	108.533589*	15.92364000*
Cu Lao Cham	Bai Nan	4.6	Live coral	108.533102*	15.92404266*
Cu Lao Cham	Bai Nan	4.5	Live coral	108.533089*	15.92398000*
Cu Lao Cham	Bai Nan	4	Live coral	108.533139*	15.92403000*
Cu Lao Cham	Bai Nan	4	Live coral	108.533139*	15.92409000*
Cu Lao Cham	Bai Nan	4.9	Live coral	108.533079*	15.92407000*
Cu Lao Cham	Bai Nan	3.6	Live coral	108.532839*	15.92443000*
Cu Lao Cham	Bai Nan	3.4	Live coral	108.532879*	15.92443000*
Cu Lao Cham	Bai Nan	4.8	Live coral	108.532819*	15.92438000*
Cu Lao Cham	Bai Nan	3.4	Live coral	108.532839*	15.92447000*
Cu Lao Cham	Bai Nan	2.3	Live coral	108.532809*	15.92481000*
Cu Lao Cham	Bai Nan	1.7	Live coral	108.532829*	15.92474000*
Cu Lao Cham	Bai Nan	2.4	Live coral	108.532849*	15.92481000*
Cu Lao Cham	Bai Nan	1.6	Live coral	108.532819*	15.92484000*
Cu Lao Cham	Bai Nan	2.1	Live coral	108.532779*	15.92482000*
Cu Lao Cham	Bai Nan	3.7	Live coral	108.532419*	15.92517000*
Cu Lao Cham	Bai Nan	3.7	Live coral	108.532399*	15.92511000*
Cu Lao Cham	Bai Nan	2.3	Live coral	108.532449*	15.92516000*
Cu Lao Cham	Bai Nan	3.6	Live coral	108.532379*	15.92519000*
Cu Lao Cham	Bai Nan	2.5	Live coral	108.532365*	15.92538416*
Cu Lao Cham	Bai Nan	3.4	Live coral	108.532389*	15.92535000*
Cu Lao Cham	Bai Nan	3	Live coral	108.532299*	15.92538000*
Cu Lao Cham	Bai Nan	2.2	Live coral	108.532359*	15.92543000*
Cu Lao Cham	Bai Nan	2.1	Live coral	108.532419*	15.92540000*
Cu Lao Cham	Bai Nan	3.4	Live coral	108.532009*	15.92527000*
Cu Lao Cham	Bai Nan	5.1	Live coral	108.531959*	15.92522000*
Cu Lao Cham	Bai Nan	4	Live coral	108.532009*	15.92529000*
Cu Lao Cham	Hon Tai	6.8	Live coral	108.540319*	15.90320000*
Cu Lao Cham	Hon Tai	7.9	Live coral	108.539729*	15.90324000*
Cu Lao Cham	Hon Tai	8.8	Live coral	108.539529*	15.90320000*
Cu Lao Cham	Hon Tai	5.5	Live coral	108.539419*	15.90324000*
Cu Lao Cham	Hon Tai	4.7	Live coral	108.539309*	15.90328000*
Cu Lao Cham	Hon Tai	9.7	Live coral	108.539709*	15.90310000*
Cu Lao Cham	Hon Tai	4.5	Live coral	108.531889*	15.90529000*
Cu Lao Cham	Hon Tai	6.2	Live coral	108.531849*	15.90532000*
Cu Lao Cham	Hon Tai	6.9	Live coral	108.531819*	15.90555000*
Cu Lao Cham	Hon Tai	7.5	Live coral	108.531839*	15.90568000*
Cu Lao Cham	Hon Tai	7.3	Live coral	108.540179*	15.90323000*
Cu Lao Cham	Hon Tai	1.7	Live coral	108.532079*	15.90575000*
Cu Lao Cham	Hon Tai	7.9	Live coral	108.531819*	15.90599000*
Cu Lao Cham	Hon Tai	4.5	Live coral	108.531939*	15.90606000*
Cu Lao Cham	Hon Tai	2.2	Live coral	108.531999*	15.90630000*
Cu Lao Cham	Hon Tai	7.9	Live coral	108.531819*	15.90630000*
Cu Lao Cham	Hon Tai	5.5	Live coral	108.540139*	15.90339000*
Cu Lao Cham	Hon Tai	6.1	Live coral	108.533039*	15.90805000*
Cu Lao Cham	Hon Tai	7.4	Live coral	108.533089*	15.90815000*
Cu Lao Cham	Hon Tai	5.2	Live coral	108.533229*	15.90807000*
Cu Lao Cham	Hon Tai	5.1	Live coral	108.533449*	15.90815000*
Cu Lao Cham	Hon Tai	8.2	Live coral	108.533359*	15.90831000*
Cu Lao Cham	Hon Tai	7.8	Live coral	108.533449*	15.90839000*
Cu Lao Cham	Hon Tai	2	Live coral	108.533709*	15.90818000*
Cu Lao Cham	Hon Tai	1.6	Live coral	108.533779*	15.90825000*
Cu Lao Cham	Hon Tai	4.3	Live coral	108.533719*	15.90846000*
Cu Lao Cham	Hon Tai	5.8	Live coral	108.540049*	15.90342000*
Cu Lao Cham	Hon Tai	7.3	Live coral	108.533579*	15.90854000*
Cu Lao Cham	Hon Tai	12.6	Live coral	108.533649*	15.90867000*
Cu Lao Cham	Hon Tai	9.2	Live coral	108.533759*	15.90877000*
Cu Lao Cham	Hon Tai	7.2	Live coral	108.539989*	15.90336000*
Cu Lao Cham	Hon Tai	4.2	Live coral	108.539829*	15.90355000*
Cu Lao Cham	Hon Tai	3.5	Live coral	108.539679*	15.90360000*
Cu Lao Cham	Hon Tai	2.8	Live coral	108.539599*	15.90356000*
Cu Lao Cham	Hon Tai	5	Live coral	108.540409*	15.90330000*
Cu Lao Cham	Hon Tai	5	Live coral	108.540409*	15.90326000*
Cu Lao Cham	Hon Tai	3.8	Live coral	108.533219*	15.90798000*
Cu Lao Cham	Hon Tai	2.4	Live coral	108.533459*	15.90802000*
Cu Lao Cham	Hon Tai	2.4	Live coral	108.533549*	15.90799000*
Cu Lao Cham	Hon Tai	2.5	Live coral	108.533559*	15.90803000*
Cu Lao Cham	Hon Tai	2.4	Live coral	108.533518*	15.90802577*
Cu Lao Cham	Hon Tai	4.3	Live coral	108.533649*	15.90832000*
Cu Lao Cham	Hon Tai	3	Live coral	108.533629*	15.90828000*
Cu Lao Cham	Hon Tai	2.5	Live coral	108.533679*	15.90830000*
Cu Lao Cham	Hon Tai	3.9	Live coral	108.533639*	15.90833000*
Cu Lao Cham	Hon Tai	1.8	Live coral	108.533839*	15.90842000*
Cu Lao Cham	Hon Tai	2	Live coral	108.533859*	15.90834000*
Cu Lao Cham	Hon Tai	2.2	Live coral	108.533889*	15.90843000*
Cu Lao Cham	Hon Tai	2.4	Live coral	108.533849*	15.90850000*
Cu Lao Cham	Hon Tai	2.3	Live coral	108.533809*	15.90844000*
Cu Lao Cham	Hon Tai	2.4	Live coral	108.533969*	15.90877000*
Cu Lao Cham	Hon Tai	5.2	Live coral	108.533899*	15.90876000*
Cu Lao Cham	Hon Tai	3.4	Live coral	108.533959*	15.90872000*
Cu Lao Cham	Hon Tai	2.5	Live coral	108.533999*	15.90876000*
Cu Lao Cham	Hon Tai	4.4	Live coral	108.533969*	15.90881000*
Cu Lao Cham	Hon Tai	4.6	Live coral	108.534089*	15.90903000*
Cu Lao Cham	Hon Tai	5.6	Live coral	108.534039*	15.90900000*
Cu Lao Cham	Hon Tai	3.2	Live coral	108.534107*	15.90897746*
Cu Lao Cham	Hon Tai	4.2	Live coral	108.534139*	15.90901000*
Cu Lao Cham	Hon Tai	4.3	Live coral	108.534069*	15.90905000*
Cu Lao Cham	Hon Tai	3.7	Live coral	108.540129*	15.90352000*
Cu Lao Cham	Hon Tai	3.6	Live coral	108.540149*	15.90344000*
Cu Lao Cham	Hon Tai	2.8	Live coral	108.540179*	15.90354000*
Cu Lao Cham	Hon Tai	3.8	Live coral	108.540109*	15.90355000*
Cu Lao Cham	Hon Tai	3.2	Live coral	108.540079*	15.90351000*
Cu Lao Cham	Hon Tai	2.5	Live coral	108.539789*	15.90370000*
Cu Lao Cham	Hon Tai	3.7	Live coral	108.539809*	15.90361000*
Cu Lao Cham	Hon Tai	2.2	Live coral	108.539749*	15.90374000*
Cu Lao Cham	Hon Tai	3.4	Live coral	108.539759*	15.90367000*
Cu Lao Cham	Hon Tai	4.7	Live coral	108.539751*	15.90344798*
Cu Lao Cham	Hon Tai	4.5	Live coral	108.539699*	15.90341000*
Cu Lao Cham	Hon Tai	5.7	Live coral	108.539759*	15.90340000*
Cu Lao Cham	Hon Tai	4.7	Live coral	108.539799*	15.90344000*
Cu Lao Cham	Hon Tai	4.5	Live coral	108.539749*	15.90350000*
Cu Lao Cham	Hon Tai	6.7	Live coral	108.539149*	15.90319000*
Cu Lao Cham	Hon Tai	5.9	Live coral	108.539189*	15.90324000*
Cu Lao Cham	Hon Tai	6	Live coral	108.539119*	15.90322000*
Cu Lao Cham	Hon Tai	5.2	Live coral	108.539119*	15.90318000*
Cu Lao Cham	Hon Tai	5.8	Live coral	108.539179*	15.90317000*
Cu Lao Cham	Hon Tai	3.6	Live coral	108.531929*	15.90531000*
Cu Lao Cham	Hon Tai	4.4	Live coral	108.531943*	15.90526728*
Cu Lao Cham	Hon Tai	1.8	Live coral	108.531969*	15.90537000*
Cu Lao Cham	Hon Tai	2.2	Live coral	108.532013*	15.90529728*
Cu Lao Cham	Hon Tai	4.1	Live coral	108.531899*	15.90534000*
Cu Lao Cham	Hon Tai	5.2	Live coral	108.531879*	15.90541000*
Cu Lao Cham	Hon Tai	4	Live coral	108.531939*	15.90550000*
Cu Lao Cham	Hon Tai	5	Live coral	108.531899*	15.90550000*
Cu Lao Cham	Hon Tai	2.8	Live coral	108.531981*	15.90577558*
Cu Lao Cham	Hon Tai	4.2	Live coral	108.531939*	15.90573000*
Cu Lao Cham	Hon Tai	2.8	Live coral	108.532029*	15.90573000*
Cu Lao Cham	Hon Tai	2.3	Live coral	108.532029*	15.90587000*
Cu Lao Cham	Hon Tai	3.9	Live coral	108.531939*	15.90578000*
Cu Lao Cham	Hon Tai	2.8	Live coral	108.531959*	15.90599000*
Cu Lao Cham	Hon Tai	3.1	Live coral	108.531919*	15.90590000*
Cu Lao Cham	Hon Tai	2.2	Live coral	108.532009*	15.90596000*
Cu Lao Cham	Hon Tai	1.8	Live coral	108.532009*	15.90602000*
Cu Lao Cham	Hon Tai	3.8	Live coral	108.531939*	15.90603000*
Cu lao cham	Bai bac	3.2	Live coral	108.497029*	15.95601000*
Cu Lao Cham	Bai ong	6.1	Live coral	108.496859*	15.95700000*
Cu lao cham	Bai bac	4.2	Live coral	108.491639*	15.95720000*
Cu lao cham	Bai bac	6.1	Live coral	108.491519*	15.95707000*
Cu lao cham	Bai bac	4.3	Live coral	108.489239*	15.96104000*
Cu lao cham	Bai bac	3.9	Live coral	108.489269*	15.96091000*
Cu lao cham	Bai bac	7.2	Live coral	108.489439*	15.95993000*
Cu lao cham	Bai bac	7.8	Live coral	108.489739*	15.95948000*
Cu lao cham	Bai bac	1.8	Live coral	108.489209*	15.96214000*
Cu lao cham	Bai bac	1.8	Live coral	108.489169*	15.96215000*
Cu lao cham	Bai bac	1.2	Live coral	108.489249*	15.96220000*
Cu lao cham	Bai bac	2.8	Live coral	108.489309*	15.96210000*
Cu lao cham	Bai bac	2.1	Live coral	108.489209*	15.96207000*
Cu lao cham	Bai bac	4	Live coral	108.489039*	15.96194000*
Cu lao cham	Bai bac	2.7	Live coral	108.489329*	15.96198000*
Cu lao cham	Bai bac	1.6	Live coral	108.489469*	15.96195000*
Cu lao cham	Bai bac	1.7	Live coral	108.489379*	15.96188000*
Cu lao cham	Bai bac	1.1	Live coral	108.489609*	15.96182000*
Cu lao cham	Bai bac	1.2	Live coral	108.489549*	15.96184000*
Cu lao cham	Bai bac	0.7	Live coral	108.489699*	15.96178000*
Cu lao cham	Bai bac	1.5	Live coral	108.489589*	15.96173000*
Cu lao cham	Bai bac	2	Live coral	108.489283*	15.96130553*
Cu lao cham	Bai bac	2.7	Live coral	108.489359*	15.96140000*
Cu lao cham	Bai bac	3.9	Live coral	108.489319*	15.96131000*
Cu lao cham	Bai bac	2.5	Live coral	108.489319*	15.96124000*
Cu lao cham	Bai bac	1.6	Live coral	108.489399*	15.96130000*
Cu lao cham	Bai bac	3.8	Live coral	108.489339*	15.96065000*
Cu lao cham	Bai bac	3.8	Live coral	108.489350*	15.96075598*
Cu lao cham	Bai bac	4.8	Live coral	108.489229*	15.96063000*
Cu lao cham	Bai bac	3.6	Live coral	108.489279*	15.96056000*
Cu lao cham	Bai bac	3.2	Live coral	108.489399*	15.96064000*
Cu lao cham	Bai bac	1.7	Live coral	108.489619*	15.96092000*
Cu lao cham	Bai bac	2	Live coral	108.489549*	15.96091000*
Cu lao cham	Bai bac	1.5	Live coral	108.489619*	15.96099000*
Cu lao cham	Bai bac	1.2	Live coral	108.489709*	15.96092000*
Cu lao cham	Bai bac	1.6	Live coral	108.489609*	15.96082000*
Cu lao cham	Bai bac	0.8	Live coral	108.489876*	15.96085242*
Cu lao cham	Bai bac	0.8	Live coral	108.489814*	15.96084549*
Cu lao cham	Bai bac	0.8	Live coral	108.489879*	15.96091000*
Cu lao cham	Bai bac	0.6	Live coral	108.489949*	15.96084000*
Cu lao cham	Bai bac	0.9	Live coral	108.489869*	15.96078000*
Cu lao cham	Bai bac	1.7	Live coral	108.489569*	15.96032000*
Cu lao cham	Bai bac	2.3	Live coral	108.489593*	15.96037971*
Cu lao cham	Bai bac	3.1	Live coral	108.489489*	15.96034000*
Cu lao cham	Bai bac	3.1	Live coral	108.489549*	15.96026000*
Cu lao cham	Bai bac	2.9	Live coral	108.489629*	15.96030000*
Cu lao cham	Bai bac	4.5	Live coral	108.489599*	15.95996072*
Cu lao cham	Bai bac	4.2	Live coral	108.489649*	15.95998000*
Cu lao cham	Bai bac	2.4	Live coral	108.489989*	15.95996944*
Cu lao cham	Bai bac	1.3	Live coral	108.490082*	15.96010475*
Cu lao cham	Bai bac	5.4	Live coral	108.489849*	15.95960000*
Cu lao cham	Bai bac	4.5	Live coral	108.489879*	15.95969000*
Cu lao cham	Bai bac	4.3	Live coral	108.489909*	15.95957000*
Cu lao cham	Bai bac	2	Live coral	108.490299*	15.95956000*
Cu lao cham	Bai bac	1.5	Live coral	108.490349*	15.95964000*
Cu lao cham	Bai bac	1.1	Live coral	108.490389*	15.95953000*
Cu lao cham	Bai bac	6.8	Live coral	108.490089*	15.95910000*
Cu lao cham	Bai bac	6	Live coral	108.490129*	15.95914000*
Cu lao cham	Bai bac	7.4	Live coral	108.490039*	15.95908000*
Cu lao cham	Bai bac	2.7	Live coral	108.490389*	15.95911000*
Cu lao cham	Bai bac	2.3	Live coral	108.490529*	15.95907000*
Cu lao cham	Bai bac	2.8	Live coral	108.490429*	15.95902000*
Cu lao cham	Bai bac	1.3	Live coral	108.490759*	15.95905000*
Cu lao cham	Bai bac	1.2	Live coral	108.490719*	15.95907000*
Cu lao cham	Bai bac	0.9	Live coral	108.490791*	15.95910850*
Cu lao cham	Bai bac	1.1	Live coral	108.490839*	15.95901000*
Cu lao cham	Bai bac	1.9	Live coral	108.490749*	15.95897000*
Cu lao cham	Bai bac	2.3	Live coral	108.491269*	15.95815000*
Cu lao cham	Bai bac	1.9	Live coral	108.491189*	15.95812000*
Cu lao cham	Bai bac	0.9	Live coral	108.491229*	15.95801000*
Cu lao cham	Bai bac	6	Live coral	108.491269*	15.95765000*
Cu lao cham	Bai bac	5.4	Live coral	108.491299*	15.95766000*
Cu lao cham	Bai bac	7.1	Live coral	108.490649*	15.95840000*
Cu lao cham	Bai bac	5.7	Live coral	108.490599*	15.95847000*
Cu lao cham	Bai bac	7.6	Live coral	108.490359*	15.95866000*
Cu lao cham	Bai bac	7.2	Live coral	108.490449*	15.95868000*
Cu lao cham	Bai bac	6.5	Live coral	108.490419*	15.95876000*
Cu lao cham	Bai bac	4.2	Live coral	108.488438*	15.96831881*
Cu lao cham	Bai bac	3.7	Live coral	108.488578*	15.96829881*
Cu lao cham	Bai bac	1.8	Live coral	108.489325*	15.96242699*
Cu lao cham	Bai bac	1.8	Live coral	108.489300*	15.96237761*
Cu Lao Cham	Bai ong	4.8	Live coral	108.496849*	15.95733000*
Cu Lao Cham	Bai ong	7.8	Live coral	108.496919*	15.95699000*
Cu Lao Cham	Bai ong	2.6	Live coral	108.494669*	15.95577000*
Cu Lao Cham	Bai ong	1.5	Live coral	108.494649*	15.95586000*
Cu Lao Cham	Bai ong	2.2	Live coral	108.494739*	15.95580000*
Cu Lao Cham	Bai ong	3.8	Live coral	108.494709*	15.95572000*
Cu Lao Cham	Bai ong	5.9	Live coral	108.496279*	15.95625000*
Cu Lao Cham	Bai ong	6	Live coral	108.496269*	15.95623000*
Cu Lao Cham	Bai ong	7.1	Live coral	108.496349*	15.95621000*
Cu Lao Cham	Bai ong	6.4	Live coral	108.496389*	15.95631000*
Cu Lao Cham	Bai ong	5.6	Live coral	108.496319*	15.95634000*
Cu Lao Cham	Bai ong	2.3	Live coral	108.496299*	15.95654000*
Cu Lao Cham	Bai ong	4.2	Live coral	108.496299*	15.95651000*
Cu Lao Cham	Bai ong	2.2	Live coral	108.496239*	15.95652000*
Cu Lao Cham	Bai ong	1.7	Live coral	108.496279*	15.95663000*
Cu Lao Cham	Bai ong	1.6	Live coral	108.496219*	15.95659000*
Cu Lao Cham	Bai ong	4.9	Live coral	108.496579*	15.95674000*
Cu Lao Cham	Bai ong	4.6	Live coral	108.496509*	15.95676000*
Cu Lao Cham	Bai ong	4.2	Live coral	108.496639*	15.95682000*
Cu Lao Cham	Bai ong	5.5	Live coral	108.496599*	15.95669000*
Cu Lao Cham	Bai ong	4.7	Live coral	108.496519*	15.95670000*
Cu Lao Cham	Bai ong	3.1	Live coral	108.496639*	15.95698000*
Cu Lao Cham	Bai ong	3.2	Live coral	108.496509*	15.95704000*
Cu Lao Cham	Bai ong	3.2	Live coral	108.496589*	15.95712000*
Cu Lao Cham	Bai ong	3.8	Live coral	108.496679*	15.95710000*
Cu Lao Cham	Bai ong	5.3	Live coral	108.494899*	15.95561000*
Cu Lao Cham	Bai ong	3.5	Live coral	108.494819*	15.95565000*
Cu Lao Cham	Bai ong	4.5	Live coral	108.494959*	15.95562000*
Cu Lao Cham	Bai ong	5.6	Live coral	108.495039*	15.95561000*
Cu Lao Cham	Bai ong	4.5	Live coral	108.494999*	15.95565000*
Cu Lao Cham	Bai ong	5	Live coral	108.495119*	15.95562000*
Cu Lao Cham	Bai ong	2.2	Live coral	108.495289*	15.95576000*
Cu Lao Cham	Bai ong	2.3	Live coral	108.495219*	15.95580000*
Cu Lao Cham	Bai ong	3.2	Live coral	108.495249*	15.95573000*
Cu Lao Cham	Bai ong	3.9	Live coral	108.495309*	15.95571000*
Cu Lao Cham	Bai ong	2.8	Live coral	108.495339*	15.95578000*
Cu Lao Cham	Bai ong	7.5	Live coral	108.495399*	15.95562000*
Cu Lao Cham	Bai ong	5.6	Live coral	108.495349*	15.95566000*
Cu Lao Cham	Bai ong	8.1	Live coral	108.495459*	15.95562000*
Cu Lao Cham	Bai ong	5.8	Live coral	108.495479*	15.95567000*
Cu Lao Cham	Bai ong	3.6	Live coral	108.495609*	15.95584000*
Cu Lao Cham	Bai ong	4.8	Live coral	108.495569*	15.95579000*
Cu Lao Cham	Bai ong	2.9	Live coral	108.495539*	15.95588000*
Cu Lao Cham	Bai ong	3.1	Live coral	108.495649*	15.95592000*
Cu Lao Cham	Bai ong	5.4	Live coral	108.495669*	15.95584000*
Cu Lao Cham	Bai ong	6.7	Live coral	108.495829*	15.95583000*
Cu Lao Cham	Bai ong	5.9	Live coral	108.495779*	15.95587000*
Cu Lao Cham	Bai ong	6.8	Live coral	108.495899*	15.95582000*
Cu Lao Cham	Bai ong	7.2	Live coral	108.495949*	15.95585000*
Cu Lao Cham	Bai ong	6.2	Live coral	108.495899*	15.95590000*
Cu Lao Cham	Bai ong	5.7	Live coral	108.496029*	15.95603000*
Cu Lao Cham	Bai ong	6.9	Live coral	108.496029*	15.95599000*
Cu Lao Cham	Bai ong	6.9	Live coral	108.496079*	15.95602000*
Cu Lao Cham	Bai ong	6.3	Live coral	108.496079*	15.95607000*
Cu Lao Cham	Bai ong	5.7	Live coral	108.495989*	15.95606000*
Cu Lao Cham	Bai ong	6.9	Live coral	108.496169*	15.95609000*
Cu Lao Cham	Bai ong	5.9	Live coral	108.496119*	15.95609000*
Cu Lao Cham	Bai ong	4.3	Live coral	108.496059*	15.95617000*
Cu Lao Cham	Bai ong	5.6	Live coral	108.496119*	15.95622000*
Cu Lao Cham	Bai ong	7.1	Live coral	108.496179*	15.95607000*
Cu Lao Cham	Bai xep	3.5	Live coral	108.507109*	15.95354000*
Cu Lao Cham	Bai xep	4.8	Live coral	108.507559*	15.95214000*
Cu Lao Cham	Bai xep	3.9	Live coral	108.507939*	15.95055000*
Cu Lao Cham	Bai xep	6.4	Live coral	108.507999*	15.94909000*
Cu Lao Cham	Bai xep	6.2	Live coral	108.508009*	15.94867000*
Cu Lao Cham	Bai xep	5.2	Live coral	108.508239*	15.94788000*
Cu Lao Cham	Bai xep	6.2	Live coral	108.508109*	15.94672000*
Cu Lao Cham	Bai xep	4.3	Live coral	108.508189*	15.94656000*
Cu Lao Cham	Bai xep	2.8	Live coral	108.508149*	15.94629000*
Cu Lao Cham	Bai xep	4.3	Live coral	108.508019*	15.94600000*
Cu Lao Cham	Bai xep	2.8	Live coral	108.507969*	15.94591000*
Cu Lao Cham	Bai xep	7.1	Live coral	108.507799*	15.94589000*
Cu Lao Cham	Bai xep	4.8	Live coral	108.507419*	15.94538000*
Cu Lao Cham	Bai xep	3.1	Live coral	108.507339*	15.95319000*
Cu Lao Cham	Bai xep	2	Live coral	108.507439*	15.95323000*
Cu Lao Cham	Bai xep	3	Live coral	108.507419*	15.95311000*
Cu Lao Cham	Bai xep	5.6	Live coral	108.507459*	15.95241000*
Cu Lao Cham	Bai xep	5	Live coral	108.507479*	15.95244000*
Cu Lao Cham	Bai xep	6.1	Live coral	108.507409*	15.95240000*
Cu Lao Cham	Bai xep	5.4	Live coral	108.507449*	15.95230000*
Cu Lao Cham	Bai xep	3.7	Live coral	108.507529*	15.95235000*
Cu Lao Cham	Bai xep	2.7	Live coral	108.507949*	15.95148000*
Cu Lao Cham	Bai xep	3.1	Live coral	108.507899*	15.95152000*
Cu Lao Cham	Bai xep	2.6	Live coral	108.507979*	15.95154000*
Cu Lao Cham	Bai xep	2.4	Live coral	108.508029*	15.95145000*
Cu Lao Cham	Bai xep	3.1	Live coral	108.507949*	15.95144000*
Cu Lao Cham	Bai xep	2.9	Live coral	108.508259*	15.94942000*
Cu Lao Cham	Bai xep	3.6	Live coral	108.508189*	15.94949000*
Cu Lao Cham	Bai xep	3.1	Live coral	108.508219*	15.94939000*
Cu Lao Cham	Bai xep	2.7	Live coral	108.508289*	15.94940000*
Cu Lao Cham	Bai xep	3.2	Live coral	108.508369*	15.94770000*
Cu Lao Cham	Bai xep	2.5	Live coral	108.508391*	15.94775396*
Cu Lao Cham	Bai xep	4	Live coral	108.508289*	15.94777000*
Cu Lao Cham	Bai xep	4.3	Live coral	108.508289*	15.94767000*
Cu Lao Cham	Bai xep	2.6	Live coral	108.508389*	15.94764000*
Cu Lao Cham	Bai xep	2.7	Live coral	108.508349*	15.94710000*
Cu Lao Cham	Bai xep	4.1	Live coral	108.508319*	15.94716000*
Cu Lao Cham	Bai xep	3.5	Live coral	108.508329*	15.94705000*
Cu Lao Cham	Bai xep	1.7	Live coral	108.508369*	15.94689000*
Cu Lao Cham	Bai xep	2.1	Live coral	108.508409*	15.94691000*
Cu Lao Cham	Bai xep	2.8	Live coral	108.508319*	15.94695000*
Cu Lao Cham	Bai xep	2.5	Live coral	108.508339*	15.94686000*
Cu Lao Cham	Bai xep	1.8	Live coral	108.508409*	15.94686000*
Cu Lao Cham	Bai xep	4.5	Live coral	108.508079*	15.94609000*
Cu Lao Cham	Bai xep	3.3	Live coral	108.508129*	15.94609000*
Cu Lao Cham	Bai xep	2	Live coral	108.508129*	15.94604000*
Cu Lao Cham	Bai xep	3.8	Live coral	108.507589*	15.94555000*
Cu Lao Cham	Bai xep	2.1	Live coral	108.507729*	15.94559000*
Cu Lao Cham	Bai xep	6.2	Live coral	108.507599*	15.94565000*
Cu Lao Cham	Bai xep	5.9	Live coral	108.507559*	15.94557000*
Cu Lao Cham	Bai xep	2.4	Live coral	108.507609*	15.94552000*
Cu lao cham	Hon dai	5.5	Live coral	108.483379*	15.94282000*
Cu lao cham	Hon dai	4.6	Live coral	108.483339*	15.94285000*
Cu lao cham	Hon dai	3.8	Live coral	108.483359*	15.94288000*
Cu lao cham	Hon dai	5.6	Live coral	108.483439*	15.94287000*
Cu lao cham	Hon dai	10.5	Live coral	108.483669*	15.94294000*
Cu lao cham	Hon dai	8.2	Live coral	108.483719*	15.94320000*
Cu lao cham	Hon dai	6.3	Live coral	108.483729*	15.94334000*
Cu lao cham	Hon dai	5.6	Live coral	108.483169*	15.94159000*
Cu lao cham	Hon dai	6.2	Live coral	108.483339*	15.94194000*
Cu lao cham	Hon dai	4.5	Live coral	108.483279*	15.94203000*
Cu lao cham	Hon dai	5.8	Live coral	108.483309*	15.94226000*
Cu lao cham	Hon dai	10.2	Live coral	108.483559*	15.94262000*
Cu lao cham	Hon dai	7.2	Live coral	108.483529*	15.94274000*
Cu lao cham	Hon dai	4.5	Live coral	108.483829*	15.94375000*
Cu lao cham	Hon dai	6.8	Live coral	108.483873*	15.94373039*
Cu lao cham	Hon dai	8.2	Live coral	108.484049*	15.94362000*
Cu lao cham	Hon dai	8.4	Live coral	108.484149*	15.94378000*
Cu lao cham	Hon dai	8.9	Live coral	108.484259*	15.94401000*
Cu lao cham	Hon dai	8.2	Live coral	108.484309*	15.94420000*
Cu lao cham	Hon dai	6.8	Live coral	108.484169*	15.94420000*
Cu lao cham	Hon dai	4.1	Live coral	108.484019*	15.94414000*
Cu lao cham	Hon dai	4.6	Live coral	108.483709*	15.94332000*
Cu lao cham	Hon dai	6.8	Live coral	108.483769*	15.94329000*
Cu lao cham	Hon dai	7.5	Live coral	108.483829*	15.94335000*
Cu lao cham	Hon dai	4.5	Live coral	108.483739*	15.94341000*
Cu lao cham	Hon dai	5.5	Live coral	108.483829*	15.94370953*
Cu lao cham	Hon dai	6.7	Live coral	108.483849*	15.94368000*
Cu lao cham	Hon dai	4.9	Live coral	108.483799*	15.94370000*
Cu lao cham	Hon dai	4.5	Live coral	108.484259*	15.94474000*
Cu lao cham	Hon dai	4.7	Live coral	108.484269*	15.94480000*
Cu lao cham	Hon dai	6.5	Live coral	108.484339*	15.94478000*
Cu lao cham	Hon dai	10.8	Live coral	108.484499*	15.94473000*
Cu lao cham	Hon dai	8.5	Live coral	108.484579*	15.94490000*
Cu lao cham	Hon dai	7.3	Live coral	108.484629*	15.94508000*
Cu lao cham	Hon dai	6.3	Live coral	108.484489*	15.94517000*
Cu lao cham	Hon dai	5	Live coral	108.484349*	15.94519000*
Cu lao cham	Hon dai	5.1	Live coral	108.484059*	15.94417000*
Cu lao cham	Hon dai	4.8	Live coral	108.484049*	15.94409000*
Cu lao cham	Hon dai	3.5	Live coral	108.483989*	15.94422000*
Cu lao cham	Hon dai	3.8	Live coral	108.484059*	15.94436000*
Cu lao cham	Hon dai	5.6	Live coral	108.484179*	15.94451000*
Cu lao cham	Hon dai	4.9	Live coral	108.484291*	15.94476131*
Cu lao cham	Hon dai	5.9	Live coral	108.484319*	15.94471000*
Cu lao cham	Hon dai	5.5	Live coral	108.484499*	15.94546000*
Cu lao cham	Hon dai	7.8	Live coral	108.484719*	15.94544000*
Cu lao cham	Hon dai	6.8	Live coral	108.484829*	15.94572000*
Cu lao cham	Hon dai	5.4	Live coral	108.484699*	15.94578000*
Cu lao cham	Hon dai	3.7	Live coral	108.484641*	15.94584011*
Cu lao cham	Hon dai	4.7	Live coral	108.484599*	15.94579000*
Cu lao cham	Hon dai	5.2	Live coral	108.484584*	15.94584431*
Cu lao cham	Hon dai	4.1	Live coral	108.484319*	15.94518000*
Cu lao cham	Hon dai	6	Live coral	108.484399*	15.94514000*
Cu lao cham	Hon dai	5.1	Live coral	108.484399*	15.94523000*
Cu lao cham	Hon dai	3.4	Live coral	108.484339*	15.94527000*
Cu lao cham	Hon dai	3.5	Live coral	108.484329*	15.94545000*
Cu lao cham	Hon dai	2.5	Live coral	108.484279*	15.94547000*
Cu lao cham	Hon dai	1.8	Live coral	108.484279*	15.94553000*
Cu lao cham	Hon dai	4.2	Live coral	108.484369*	15.94551000*
Cu lao cham	Hon mo	6.2	Live coral	108.476589*	15.93152000*
Cu lao cham	Hon mo	8.1	Live coral	108.476839*	15.93184000*
Cu lao cham	Hon mo	5.1	Live coral	108.476619*	15.93193000*
Cu lao cham	Hon mo	4.2	Live coral	108.476711*	15.93192809*
Cu lao cham	Hon mo	5.8	Live coral	108.476719*	15.93183000*
Cu lao cham	Hon mo	7.2	Live coral	108.476819*	15.93196000*
Cu lao cham	Hon mo	4.3	Live coral	108.476679*	15.93201000*
Cu lao cham	Hon mo	6.3	Live coral	108.476009*	15.93128000*
Cu lao cham	Hon mo	7.2	Live coral	108.476269*	15.93131200*
Cu lao cham	Hon mo	7.6	Live coral	108.476409*	15.93127000*
Cu lao cham	Hon mo	5.2	Live coral	108.476459*	15.93151000*
Cu lao cham	Hon mo	6.8	Live coral	108.476459*	15.93147000*
Cu lao cham	Hon mo	5.6	Live coral	108.476389*	15.93151000*
Cu lao cham	Hon mo	5.3	Live coral	108.476419*	15.93156000*
Cu lao cham	Hon mo	4.2	Live coral	108.474750*	15.93339803*
Cu lao cham	Hon mo	4.8	Live coral	108.474640*	15.93349803*
Cu lao cham	Hon mo	5.4	Live coral	108.474316*	15.93388714*
Cu lao cham	Hon mo	4.7	Live coral	108.474236*	15.93379426*
Cu lao cham	Hon mo	3.2	Live coral	108.474286*	15.93373714*
Cu lao cham	Hon mo	6.2	Live coral	108.474206*	15.93362614*
Cu lao cham	Hon mo	7.8	Live coral	108.476049*	15.93321000*
Cu lao cham	Hon mo	2.2	Live coral	108.475649*	15.93319000*
Cu lao cham	Hon mo	2.1	Live coral	108.475679*	15.93312000*
Cu lao cham	Hon mo	3.2	Live coral	108.475609*	15.93322000*
Cu lao cham	Hon mo	9.5	Live coral	108.475459*	15.93342000*
Cu lao cham	Hon mo	7.4	Live coral	108.475079*	15.93348000*
Cu lao cham	Hon mo	3.2	Live coral	108.474665*	15.93341261*
Cu lao cham	Hon dai	3.9	Live coral	108.481590*	15.93971953*
Cu lao cham	Hon dai	4.8	Live coral	108.481619*	15.93967000*
Cu lao cham	Hon dai	3.1	Live coral	108.481569*	15.93976000*
Cu lao cham	Hon dai	5.2	Live coral	108.481629*	15.93974000*
Cu lao cham	Hon dai	8.4	Live coral	108.481769*	15.93975000*
Cu lao cham	Hon dai	8.7	Live coral	108.481959*	15.93990000*
Cu lao cham	Hon dai	8.2	Live coral	108.482079*	15.94023000*
Cu lao cham	Hon dai	7.5	Live coral	108.480929*	15.93838000*
Cu lao cham	Hon dai	5.2	Live coral	108.480839*	15.93858000*
Cu lao cham	Hon dai	8.9	Live coral	108.481079*	15.93866000*
Cu lao cham	Hon dai	7.2	Live coral	108.481289*	15.93892000*
Cu lao cham	Hon dai	4.8	Live coral	108.481249*	15.93909000*
Cu lao cham	Hon dai	5.3	Live coral	108.481349*	15.93930000*
Cu lao cham	Hon dai	6.7	Live coral	108.481529*	15.93951000*
Cu lao cham	Hon dai	3.4	Live coral	108.482529*	15.94111000*
Cu lao cham	Hon dai	6.7	Live coral	108.482689*	15.94112000*
Cu lao cham	Hon dai	9.8	Live coral	108.482959*	15.94113000*
Cu lao cham	Hon dai	8.2	Live coral	108.483109*	15.94130000*
Cu lao cham	Hon dai	4.4	Live coral	108.483089*	15.94157000*
Cu lao cham	Hon dai	4.7	Live coral	108.483120*	15.94151791*
Cu lao cham	Hon dai	3.9	Live coral	108.483051*	15.94152306*
Cu lao cham	Hon dai	6.1	Live coral	108.482179*	15.94042000*
Cu lao cham	Hon dai	5.6	Live coral	108.482169*	15.94068000*
Cu lao cham	Hon dai	4.5	Live coral	108.482129*	15.94065000*
Cu lao cham	Hon dai	5.7	Live coral	108.482199*	15.94061000*
Cu lao cham	Hon dai	5.5	Live coral	108.482219*	15.94069000*
Cu lao cham	Hon dai	5.2	Live coral	108.482189*	15.94073000*
Cu lao cham	Hon dai	6.3	Live coral	108.482379*	15.94078000*
Cu lao cham	Hon dai	4.3	Live coral	108.482389*	15.94097000*
Cu lao cham	Hon dai	8.3	Live coral	108.478259*	15.94635000*
Cu lao cham	Hon dai	6.4	Live coral	108.478259*	15.94620000*
Cu lao cham	Hon dai	5.2	Live coral	108.478339*	15.94604000*
Cu lao cham	Hon dai	5.3	Live coral	108.478329*	15.94608000*
Cu lao cham	Hon dai	4	Live coral	108.478369*	15.94605000*
Cu lao cham	Hon dai	8.9	Live coral	108.479759*	15.94842000*
Cu lao cham	Hon dai	3	Live coral	108.479109*	15.94717000*
Cu lao cham	Hon dai	2.9	Live coral	108.479019*	15.94700000*
Cu lao cham	Hon dai	7.4	Live coral	108.478309*	15.94656000*
Cu lao cham	Hon dai	4.9	Live coral	108.478209*	15.94536000*
Cu lao cham	Hon dai	5.3	Live coral	108.478297*	15.94541950*
Cu lao cham	Hon dai	4.6	Live coral	108.477929*	15.94513000*
Cu lao cham	Hon dai	5.8	Live coral	108.477709*	15.94503000*
Cu lao cham	Hon dai	4.4	Live coral	108.478359*	15.94599000*
Cu lao cham	Hon dai	5.9	Live coral	108.478259*	15.94598000*
Cu lao cham	Hon dai	7.2	Live coral	108.478249*	15.94583000*
Cu lao cham	Hon dai	7.9	Live coral	108.478079*	15.94555000*
Cu lao cham	Hon dai	4.2	Live coral	108.478247*	15.94538805*
Cu lao cham	Hon dai	4.1	Live coral	108.478259*	15.94536000*
Cu lao cham	Hon dai	4.2	Live coral	108.476947*	15.94460675*
Cu lao cham	Hon dai	4.2	Live coral	108.476929*	15.94454000*
Cu lao cham	Hon dai	3.1	Live coral	108.484769*	15.94615000*
Cu lao cham	Hon dai	3.5	Live coral	108.484709*	15.94608000*
Cu lao cham	Hon dai	5.6	Live coral	108.484749*	15.94603000*
Cu lao cham	Hon dai	6.1	Live coral	108.484789*	15.94610000*
Cu lao cham	Hon dai	7.2	Live coral	108.485139*	15.94623000*
Cu lao cham	Hon dai	5.7	Live coral	108.485009*	15.94629000*
Cu lao cham	Hon dai	4.5	Live coral	108.484889*	15.94637000*
Cu lao cham	Hon dai	3.9	Live coral	108.484599*	15.94589000*
Cu lao cham	Hon dai	3.5	Live coral	108.484539*	15.94584000*
Cu lao cham	Hon dai	3.3	Live coral	108.484449*	15.94597000*
Cu lao cham	Hon dai	2.8	Live coral	108.484629*	15.94620000*
Cu lao cham	Hon dai	4.3	Live coral	108.484749*	15.94611000*
Cu lao cham	Hon dai	2.7	Live coral	108.485009*	15.94660000*
Cu lao cham	Hon dai	6.3	Live coral	108.482772*	15.94885617*
Cu lao cham	Hon dai	7.5	Live coral	108.482859*	15.94887000*
Cu lao cham	Hon dai	5.8	Live coral	108.482769*	15.94878000*
Cu lao cham	Hon dai	2.9	Live coral	108.484775*	15.94639866*
Cu lao cham	Hon dai	2.9	Live coral	108.484735*	15.94636866*
Cu lao cham	Hon dai	3.5	Live coral	108.484825*	15.94633866*
Cu lao cham	Hon dai	3.8	Live coral	108.484815*	15.94641866*
Cu lao cham	Hon dai	3	Live coral	108.484953*	15.94659406*
Cu lao cham	Hon dai	3.2	Live coral	108.484899*	15.94660000*
Cu lao cham	Hon dai	3.2	Live coral	108.484949*	15.94654000*
Cu lao cham	Hon dai	4.6	Live coral	108.482549*	15.94858000*
Cu lao cham	Hon dai	8.2	Live coral	108.482439*	15.94874000*
Cu lao cham	Hon dai	7.8	Live coral	108.482179*	15.94868000*
Cu lao cham	Hon dai	5.3	Live coral	108.482019*	15.94854000*
Cu lao cham	Hon dai	6.7	Live coral	108.482029*	15.94852000*
Cu lao cham	Hon dai	3.5	Live coral	108.482029*	15.94849000*
Cu lao cham	Hon dai	8.2	Live coral	108.482689*	15.94887000*
Cu lao cham	Hon dai	5.2	Live coral	108.482759*	15.94874000*
Cu lao cham	Hon dai	3.8	Live coral	108.482799*	15.94864000*
Cu lao cham	Hon dai	3.4	Live coral	108.482799*	15.94855000*
Cu lao cham	Hon dai	2.9	Live coral	108.482629*	15.94845000*
Cu lao cham	Hon dai	3	Live coral	108.481444*	15.94848372*
Cu lao cham	Hon dai	2.3	Live coral	108.481444*	15.94845372*
Cu lao cham	Hon dai	2.4	Live coral	108.481404*	15.94844372*
Cu lao cham	Hon dai	3.9	Live coral	108.481374*	15.94851284*
Cu lao cham	Hon dai	5.8	Live coral	108.480939*	15.94874000*
Cu lao cham	Hon dai	8.2	Live coral	108.480339*	15.94886000*
Cu lao cham	Hon dai	5.8	Live coral	108.480369*	15.94873000*
Cu lao cham	Hon dai	4.8	Live coral	108.481479*	15.94858000*
Cu lao cham	Hon dai	4.6	Live coral	108.481499*	15.94858000*
Cu lao cham	Hon dai	4.8	Live coral	108.481589*	15.94858000*
Cu lao cham	Hon dai	6.1	Live coral	108.481429*	15.94863000*
Cu lao cham	Hon dai	3.1	Live coral	108.481424*	15.94849372*
Cu lao cham	Hon mo	6.3	Live coral	108.472179*	15.93102200*
Cu lao cham	Hon mo	4.2	Live coral	108.472169*	15.93125000*
Cu lao cham	Hon mo	3.9	Live coral	108.472099*	15.93135000*
Cu lao cham	Hon mo	4.7	Live coral	108.472139*	15.93133000*
Cu lao cham	Hon mo	5.1	Live coral	108.472089*	15.93133000*
Cu lao cham	Hon mo	4.2	Live coral	108.472079*	15.93138000*
Cu lao cham	Hon mo	4.4	Live coral	108.471999*	15.93145000*
Cu lao cham	Hon mo	7.3	Live coral	108.472969*	15.93068000*
Cu lao cham	Hon mo	5.8	Live coral	108.472609*	15.93071000*
Cu lao cham	Hon mo	5.2	Live coral	108.472389*	15.93081000*
Cu lao cham	Hon mo	4.3	Live coral	108.471189*	15.93235000*
Cu lao cham	Hon mo	6.6	Live coral	108.475919*	15.93109000*
Cu lao cham	Hon mo	4.9	Live coral	108.475969*	15.93129255*
Cu lao cham	Hon mo	3.9	Live coral	108.475919*	15.93131000*
Cu lao cham	Hon mo	6	Live coral	108.475969*	15.93123000*
Cu lao cham	Hon mo	9.3	Live coral	108.471859*	15.93156000*
Cu lao cham	Hon mo	8.2	Live coral	108.471699*	15.93175000*
Cu lao cham	Hon mo	4.2	Live coral	108.471629*	15.93195000*
Cu lao cham	Hon mo	4.1	Live coral	108.471689*	15.93194000*
Cu lao cham	Hon mo	5.5	Live coral	108.471689*	15.93189000*
Cu lao cham	Hon mo	5.9	Live coral	108.471599*	15.93194000*
Cu lao cham	Hon mo	3.3	Live coral	108.471649*	15.93200000*
Cu lao cham	Bai bac	3.6	Live coral	108.487589*	15.96214000*
Cu lao cham	Bai bac	1.8	Live coral	108.487409*	15.96224000*
Cu lao cham	Bai bac	1.7	Live coral	108.487519*	15.96229000*
Cu lao cham	Bai bac	3.5	Live coral	108.487739*	15.96222000*
Cu lao cham	Bai bac	3.1	Live coral	108.487879*	15.96236000*
Cu lao cham	Bai bac	1.8	Live coral	108.487899*	15.96245000*
Cu lao cham	Bai bac	2.2	Live coral	108.487839*	15.96239000*
Cu lao cham	Bai bac	3.6	Live coral	108.487619*	15.96217000*
Cu lao cham	Bai bac	4	Live coral	108.487629*	15.96216000*
Cu lao cham	Bai bac	3	Live coral	108.487659*	15.96223000*
Cu lao cham	Bai bac	2.1	Live coral	108.487639*	15.96225000*
Cu lao cham	Bai bac	2	Live coral	108.487619*	15.96226000*
Cu lao cham	Bai bac	2.1	Live coral	108.487569*	15.96222000*
Cu lao cham	Bai bac	2.2	Live coral	108.487549*	15.96223000*
Cu lao cham	Bai bac	1.8	Live coral	108.488129*	15.96280000*
Cu lao cham	Bai bac	1.7	Live coral	108.488079*	15.96273000*
Cu lao cham	Bai bac	1.8	Live coral	108.488009*	15.96270000*
Cu lao cham	Bai bac	2.7	Live coral	108.487789*	15.96229000*
Cu lao cham	Bai bac	1	Live coral	108.487771*	15.96243230*
Cu lao cham	Bai bac	1.1	Live coral	108.487819*	15.96251000*
Cu lao cham	Bai bac	1.6	Live coral	108.488159*	15.96283000*
Cu lao cham	Bai bac	1.5	Live coral	108.488109*	15.96292000*
Cu lao cham	Hon Kho con	5.1	Live coral	108.417572*	15.97190864*
Cu lao cham	Hon Kho con	3.6	Live coral	108.417579*	15.97200000*
Cu lao cham	Hon Kho con	3.2	Live coral	108.417772*	15.97203265*
Cu lao cham	Hon Kho con	2.5	Live coral	108.417589*	15.97209000*
Cu lao cham	Hon Kho con	2.3	Live coral	108.417375*	15.97205521*
Cu lao cham	Hon Kho con	5.2	Live coral	108.417509*	15.97309000*
Cu lao cham	Hon Kho con	4.2	Live coral	108.417819*	15.97301000*
Cu lao cham	Hon Kho con	9.5	Live coral	108.417109*	15.97101000*
Cu lao cham	Hon Kho con	8.8	Live coral	108.417479*	15.97183000*
Cu lao cham	Hon Kho con	5	Live coral	108.418099*	15.97211000*
Cu lao cham	Hon kho me	13.9	Live coral	108.420229*	15.97342000*
Cu lao cham	Hon kho me	3.6	Live coral	108.421439*	15.97266000*
Cu lao cham	Hon kho me	2.5	Live coral	108.421309*	15.97272000*
Cu lao cham	Hon kho me	3.2	Live coral	108.421169*	15.97278000*
Cu lao cham	Hon kho me	6.4	Live coral	108.421480*	15.97217625*
Cu lao cham	Hon kho me	5.2	Live coral	108.421459*	15.97226000*
Cu lao cham	Hon kho me	5.5	Live coral	108.421372*	15.97231569*
Cu lao cham	Hon kho me	4.3	Live coral	108.421429*	15.97240000*
Cu lao cham	Hon kho me	3.3	Live coral	108.421199*	15.97205000*
Cu lao cham	Hon kho me	3.5	Live coral	108.422209*	15.97200000*
Cu lao cham	Hon kho me	3	Live coral	108.422119*	15.97208000*
Cu lao cham	Hon kho me	3.2	Live coral	108.422009*	15.97221000*
Cu lao cham	Hon kho me	3	Live coral	108.422085*	15.97225972*
Cu lao cham	Hon kho me	3	Live coral	108.422159*	15.97217000*
Cu lao cham	Hon kho me	4.3	Live coral	108.421489*	15.97228000*
Cu lao cham	Hon kho me	4.8	Live coral	108.421519*	15.97219000*
Cu lao cham	Hon kho me	4.5	Live coral	108.421619*	15.97221000*
Cu lao cham	Hon kho me	3.9	Live coral	108.421599*	15.97229000*
Cu lao cham	Hon kho me	3.5	Live coral	108.421489*	15.97239000*
Cu lao cham	Hon kho me	3.7	Live coral	108.421929*	15.97213000*
Cu lao cham	Hon kho me	4.5	Live coral	108.421999*	15.97209000*
Cu lao cham	Hon kho me	4	Live coral	108.422042*	15.97200429*
Cu lao cham	Hon la ngang	3.1	Live coral	108.446609*	15.96743000*
Cu lao cham	Hon la	7.2	Live coral	108.446899*	15.97649000*
Cu lao cham	Hon la	5.7	Live coral	108.446159*	15.97606000*
Cu lao cham	Hon la	5.2	Live coral	108.446289*	15.97609000*
Cu lao cham	Hon la	4.5	Live coral	108.446499*	15.97613000*
Cu lao cham	Hon la	3.5	Live coral	108.446249*	15.97638000*
Cu lao cham	Hon la	8.2	Live coral	108.446019*	15.97612000*
Cu lao cham	Hon la	5.4	Live coral	108.445459*	15.97563000*
Cu lao cham	Hon la	4.9	Live coral	108.445292*	15.97546693*
Cu lao cham	Hon la ngang	4.7	Live coral	108.442829*	15.97065000*
Cu lao cham	Hon la ngang	8.7	Live coral	108.446149*	15.96733000*
Cu lao cham	Hon la ngang	6.7	Live coral	108.443759*	15.96955000*
Cu lao cham	Hon la ngang	5.8	Live coral	108.444219*	15.96897000*
Cu lao cham	Hon la ngang	3.4	Live coral	108.443289*	15.97051000*
Cu lao cham	Hon la ngang	3	Live coral	108.443119*	15.97065000*
Cu lao cham	Hon la ngang	3.1	Live coral	108.443209*	15.97057000*
Cu lao cham	Hon la ngang	3.8	Live coral	108.443049*	15.97055000*
Cu lao cham	Hon la ngang	4.7	Live coral	108.443259*	15.97044000*
Cu lao cham	Hon la ngang	4.6	Live coral	108.443129*	15.97050000*
Cu lao cham	Hon la ngang	5.2	Live coral	108.443229*	15.97037000*
Cu lao cham	Hon la ngang	5	Live coral	108.443179*	15.97040000*
Cu lao cham	Hon la ngang	4.8	Live coral	108.443049*	15.97050000*
Cu lao cham	Hon la ngang	5.5	Live coral	108.443309*	15.96999000*
Cu lao cham	Hon la ngang	8.7	Live coral	108.443319*	15.96997000*
Cu lao cham	Hon la ngang	8.2	Live coral	108.443489*	15.96979000*
Cu lao cham	Hon la ngang	4.7	Live coral	108.443639*	15.96999000*
Cu lao cham	Hon la ngang	5.6	Live coral	108.443459*	15.97009000*
Cu lao cham	Hon la ngang	3.2	Live coral	108.444689*	15.96887000*
Cu lao cham	Hon la ngang	2.8	Live coral	108.444529*	15.96897000*
Cu lao cham	Hon la ngang	3.2	Live coral	108.444629*	15.96893000*
Cu lao cham	Hon la ngang	3.4	Live coral	108.444579*	15.96897000*
Cu lao cham	Hon la ngang	3.6	Live coral	108.444479*	15.96891000*
Cu lao cham	Hon la ngang	3.3	Live coral	108.444689*	15.96874000*
Cu lao cham	Hon la ngang	4.4	Live coral	108.444499*	15.96888000*
Cu lao cham	Hon la ngang	3.7	Live coral	108.444609*	15.96883000*
Cu lao cham	Hon la ngang	3.2	Live coral	108.444529*	15.96875000*
Cu lao cham	Hon la ngang	4.5	Live coral	108.444499*	15.96877000*
Cu lao cham	Hon la ngang	4.5	Live coral	108.446558*	15.96739582*
Cu lao cham	Hon la ngang	4.3	Live coral	108.446029*	15.96765000*
Cu lao cham	Hon la ngang	4	Live coral	108.446139*	15.96759000*
Cu lao cham	Hon la ngang	4.3	Live coral	108.446209*	15.96750000*
Cu lao cham	Hon la ngang	3.1	Live coral	108.446209*	15.96755000*
Cu lao cham	Hon la ngang	3.7	Live coral	108.446189*	15.96759000*
Cu lao cham	Hon la ngang	3.5	Live coral	108.446079*	15.96772000*
Cu lao cham	Hon la ngang	2.7	Live coral	108.446099*	15.96779000*
Cu lao cham	Hon la ngang	4.8	Live coral	108.446369*	15.96741000*
Cu lao cham	Hon la ngang	5.4	Live coral	108.446409*	15.96730000*
Cu lao cham	Hon la ngang	7.7	Live coral	108.446509*	15.96708000*
Cu lao cham	Hon la ngang	3	Live coral	108.446249*	15.96776000*
Cu lao cham	Hon la ngang	3.3	Live coral	108.445519*	15.96811000*
Cu lao cham	Hon la ngang	7.9	Live coral	108.444379*	15.96870000*
Cu lao cham	Hon la	12	Live coral	108.446749*	15.97654000*
Cu lao cham	Bai bac	8.7	Live coral	108.484409*	15.96379000*
Cu lao cham	Bai bac	6.1	Live coral	108.485039*	15.96259000*
Cu lao cham	Bai bac	7.2	Live coral	108.485279*	15.96240000*
Cu lao cham	Bai bac	3.1	Live coral	108.484489*	15.96398000*
Cu lao cham	Bai bac	2	Live coral	108.484649*	15.96386000*
Cu lao cham	Bai bac	8.7	Live coral	108.484663*	15.96361000*
Cu lao cham	Bai bac	3.9	Live coral	108.484819*	15.96371000*
Cu lao cham	Bai bac	5.4	Live coral	108.484979*	15.96306000*
Cu lao cham	Bai bac	8.6	Live coral	108.484899*	15.96296000*
Cu lao cham	Bai bac	1.7	Live coral	108.485379*	15.96302000*
Cu lao cham	Bai bac	3.3	Live coral	108.484059*	15.96411000*
Cu lao cham	Bai bac	3	Live coral	108.483879*	15.96421000*
Cu lao cham	Bai bac	2.5	Live coral	108.483989*	15.96417000*
Cu lao cham	Bai bac	3.5	Live coral	108.483889*	15.96415000*
Cu lao cham	Bai bac	4.9	Live coral	108.483969*	15.96407000*
Cu lao cham	Bai bac	1.7	Live coral	108.485179*	15.96339000*
Cu lao cham	Bai bac	2.3	Live coral	108.485019*	15.96357000*
Cu lao cham	Bai bac	2.2	Live coral	108.485109*	15.96347000*
Cu lao cham	Bai bac	3.2	Live coral	108.485019*	15.96344000*
Cu lao cham	Bai bac	2.5	Live coral	108.485169*	15.96328000*
Cu lao cham	Bai bac	2.5	Live coral	108.485079*	15.96334000*
Cu lao cham	Bai bac	3.2	Live coral	108.485119*	15.96326000*
Cu lao cham	Bai bac	3.7	Live coral	108.484949*	15.96335000*
Cu lao cham	Bai bac	3	Live coral	108.485049*	15.96331000*
Cu lao cham	Bai bac	3.3	Live coral	108.485309*	15.96281000*
Cu lao cham	Bai bac	2.5	Live coral	108.485219*	15.96288000*
Cu lao cham	Bai bac	5.6	Live coral	108.485036*	15.96286664*
Cu lao cham	Bai bac	4.5	Live coral	108.485159*	15.96279000*
Cu lao cham	Bai bac	4.2	Live coral	108.485259*	15.96272000*
Cu lao cham	Bai bac	5	Live coral	108.485209*	15.96268000*
Cu lao cham	Bai bac	3.7	Live coral	108.485089*	15.96275000*
Cu lao cham	Bai bac	5.5	Live coral	108.484979*	15.96282000*
Cu lao cham	Bai bac	1.7	Live coral	108.486309*	15.96209000*
Cu lao cham	Bai bac	2.7	Live coral	108.486189*	15.96215000*
Cu lao cham	Bai bac	2.2	Live coral	108.486249*	15.96213000*
Cu lao cham	Bai bac	7.6	Live coral	108.486129*	15.96209000*
		4.9	Live coral	108.416783*	15.97208333*
		5.3	Live coral	108.416816*	15.97235000*
		5.1	Live coral	108.416783*	15.97236666*
		5.9	Live coral	108.416699*	15.97228333*
		5.3	Live coral	108.416799*	15.97228333*
		3.1	Live coral	108.447799*	15.96725000*
		4.1	Live coral	108.447833*	15.96718333*
		4.6	Live coral	108.447766*	15.96708333*
		3.8	Live coral	108.447819*	15.96715111*
		3.3	Live coral	108.447566*	15.96713333*
		3.8	Live coral	108.450883*	15.97336666*
		3.8	Live coral	108.450683*	15.97311666*
		3.3	Live coral	108.450583*	15.97301666*
		4.6	Live coral	108.450666*	15.97295000*
		6	Live coral	108.450766*	15.97291666*
		4.7	Live coral	108.450683*	15.97296666*
		4.6	Live coral	108.450683*	15.97291666*
	Bai bac	1.3	Live coral	108.490449*	15.95978333*
		0.9	Live coral	108.490533*	15.95980000*
		0.8	Live coral	108.490599*	15.95975000*
		0.8	Live coral	108.490666*	15.95968333*
		0.9	Live coral	108.490766*	15.95958333*
		1	Live coral	108.490849*	15.95941666*
		0.9	Live coral	108.490849*	15.95928333*
		1.1	Live coral	108.490716*	15.95923333*
		1.6	Live coral	108.490616*	15.95915000*
	Bai bac	1.5	Live coral	108.490516*	15.95940000*
	Bai bac	1.5	Live coral	108.490499*	15.95946666*
		1	Live coral	108.490599*	15.95943333*
		0.9	Live coral	108.490549*	15.95945000*
	Bai bac	1.3	Live coral	108.490416*	15.95965000*
	Bai bac	1.3	Live coral	108.490316*	15.95990000*
		0.8	Live coral	108.490449*	15.96000000*
		6.9	Live coral	108.477033*	15.94093333*
		3.4	Live coral	108.477216*	15.94096666*
	SunGr	2.2	Live coral	108.477233*	15.94115000*
		2.7	Live coral	108.477149*	15.94113333*
		3.2	Live coral	108.477366*	15.94121666*
		2.9	Live coral	108.477183*	15.94120000*
		2.7	Live coral	108.477066*	15.94140000*
		3	Live coral	108.477049*	15.94158333*
		3.3	Live coral	108.476966*	15.94158333*
		3.5	Live coral	108.476899*	15.94176666*
		2.3	Live coral	108.476849*	15.94198333*
		2.1	Live coral	108.476783*	15.94203333*
		3.8	Live coral	108.476649*	15.94213333*
		3.5	Live coral	108.476616*	15.94223333*
		2.8	Live coral	108.476683*	15.94225000*
		3.1	Live coral	108.476666*	15.94218333*
		2.8	Live coral	108.476799*	15.94225000*
	SunGr	2.2	Live coral	108.476716*	15.94235000*
		3.2	Live coral	108.476599*	15.94233333*
		4.9	Live coral	108.538983*	15.91126666*
		2.9	Live coral	108.536699*	15.92226666*
		1	Live coral	108.529216*	15.93011666*
		0.8	Live coral	108.529299*	15.93018333*
		0.8	Live coral	108.529283*	15.93025000*
		0.8	Live coral	108.529216*	15.93023333*
		0.8	Live coral	108.529216*	15.93018333*
		0.8	Live coral	108.529249*	15.93023333*
		0.9	Live coral	108.529299*	15.93055000*
		0.9	Live coral	108.529183*	15.93053333*
	Bai Huong	1.5	Live coral	108.528849*	15.93043333*
	Bai Huong	1.3	Live coral	108.529033*	15.93025000*
		1.6	Live coral	108.527816*	15.93121666*
	Bai Huong	1.3	Live coral	108.527783*	15.93131666*
		1	Live coral	108.527733*	15.93136666*
	Bai Huong	0.7	Live coral	108.527783*	15.93141666*
		1.1	Live coral	108.527733*	15.93140000*
		0.8	Live coral	108.527783*	15.93136666*
	Bai bac	1.2	Live coral	108.527599*	15.93141666*
		0.8	Live coral	108.527633*	15.93156666*
		2.8	Live coral	108.527433*	15.93128333*
		3.8	Live coral	108.522749*	15.93343333*
	SunGroup	1.9	Live coral	108.523049*	15.93338333*
		2.8	Live coral	108.523049*	15.93326666*
	SunGr	2.2	Live coral	108.523116*	15.93330000*
		2.4	Live coral	108.523066*	15.93331666*
		2.7	Live coral	108.523299*	15.93316666*
		2.3	Live coral	108.523399*	15.93306666*
		3.1	Live coral	108.523399*	15.93300000*
		3.1	Live coral	108.523449*	15.93291666*
	Bai bac	1.2	Live coral	108.519633*	15.93698333*
		1.1	Live coral	108.519766*	15.93700000*
		0.8	Live coral	108.519883*	15.93693333*
		0.8	Live coral	108.520049*	15.93693333*
		0.8	Live coral	108.520133*	15.93681666*
		0.8	Live coral	108.520099*	15.93666666*
		0.8	Live coral	108.520033*	15.93658333*
		1.1	Live coral	108.520066*	15.93655000*
		1	Live coral	108.520116*	15.93658333*
		0.9	Live coral	108.520083*	15.93658333*
	Bai bac	1.2	Live coral	108.520016*	15.93646666*
		2.5	Live coral	108.519783*	15.93636666*
	SunGr	2.2	Live coral	108.519583*	15.93675000*
		3.3	Live coral	108.508483*	15.94366666*
		2.5	Live coral	108.508649*	15.94373333*
		2.3	Live coral	108.508699*	15.94376666*
		2.7	Live coral	108.508766*	15.94371666*
		3.4	Live coral	108.508766*	15.94366666*
		2.3	Live coral	108.508649*	15.94368333*
		3.5	Live coral	108.509133*	15.94351666*
		3.3	Live coral	108.509316*	15.94350000*
		4.3	Live coral	108.509316*	15.94335000*
		2.5	Live coral	108.503599*	15.95741666*
		1	Live coral	108.503966*	15.95748333*
		1	Live coral	108.504049*	15.95748333*
		2.3	Live coral	108.503966*	15.95740000*
Cu lao cham	Harbour	1.4	Live coral	108.503999*	15.95745000*

## Sheet: Son Tra
Area	Sites	Depth (m)	Bottom	X_Coordina	Y_Coordina
Son Tra	Bai But	2.9	Live coral	108.2783599*	16.09728000*
Son Tra	Bai But	2.6	Live coral	108.2782999*	16.09727000*
Son Tra	Bai But	1.9	Live coral	108.2782599*	16.09733000*
Son Tra	Bai But	2.4	Live coral	108.2783599*	16.09731000*
Son Tra	Bai But	2.5	Live coral	108.2783399*	16.09726000*
Son Tra	Bai But	1.7	Live coral	108.2782299*	16.09738000*
Son Tra	Bai But	2	Live coral	108.2781399*	16.09745000*
Son Tra	Bai But	2	Live coral	108.2780199*	16.09749000*
Son Tra	Bai But	1.6	Live coral	108.2783399*	16.09742000*
Son Tra	Bai But	2.4	Live coral	108.2784399*	16.09738000*
Son Tra	Bai But	1.3	Live coral	108.2784799*	16.09747000*
Son Tra	Bai But	1.7	Live coral	108.2785699*	16.09747000*
Son Tra	Bai But	1.9	Live coral	108.2786699*	16.09745000*
Son Tra	Bai But	2	Live coral	108.2787099*	16.09731000*
Son Tra	Bai But	2.8	Live coral	108.2785999*	16.09719000*
Son Tra	Bai But	4.8	Live coral	108.2788199*	16.09708000*
Son Tra	Bai But	4.3	Live coral	108.2789799*	16.09699000*
Son Tra	Bai But	3.5	Live coral	108.2790399*	16.09708000*
Son Tra	Bai But	2.3	Live coral	108.2790499*	16.09716000*
Son Tra	Bai But	2.5	Live coral	108.2789999*	16.09717000*
Son Tra	Bai But	3.3	Live coral	108.2789999*	16.09709000*
Son Tra	Bai But	3.4	Live coral	108.2789899*	16.09712000*
Son Tra	Bai But	1.5	Live coral	108.2790499*	16.09720000*
Son Tra	Bai But	1.4	Live coral	108.2790499*	16.09729000*
Son Tra	Bai But	2.6	Live coral	108.2792099*	16.09715000*
Son Tra	Bai But	3.2	Live coral	108.2794299*	16.09710000*
Son Tra	Bai But	2.9	Live coral	108.2798499*	16.09707000*
Son Tra	Bai But	3.6	Live coral	108.2800899*	16.09707000*
Son Tra	Bai But	1.6	Live coral	108.2806499*	16.09760000*
Son Tra	Bai But	2.6	Live coral	108.2808499*	16.09771000*
Son Tra	Bai But	2.1	Live coral	108.2809599*	16.09781000*
Son Tra	Bai But	2.9	Live coral	108.2809899*	16.09790000*
Son Tra	Bai But	1.7	Live coral	108.2810899*	16.09798000*
Son Tra	Bai But	3.3	Live coral	108.2812799*	16.09798000*
Son Tra	Bai But	2.4	Live coral	108.2815499*	16.09708000*
Son Tra	Bai But	2.1	Live coral	108.2816299*	16.09813000*
Son Tra	Bai But	3.3	Live coral	108.2815799*	16.09820000*
Son Tra	Bai But	2.5	Live coral	108.2815699*	16.09831000*
Son Tra	Bai But	2.6	Live coral	108.2815999*	16.09841000*
Son Tra	Bai But	2.1	Live coral	108.2818199*	16.09844000*
Son Tra	Bai But 1	2.8	Live coral	108.2758499*	16.09719000*
Son Tra	Bai But 1	1.6	Live coral	108.2758399*	16.09728000*
Son Tra	Bai But 1	2	Live coral	108.2756399*	16.09733000*
Son Tra	Bai But 1	1.4	Live coral	108.2756699*	16.09742000*
Son Tra	Bai But 1	1.8	Live coral	108.2755699*	16.09740000*
Son Tra	Bai But 1	2	Live coral	108.2755699*	16.09732000*
Son Tra	Bai But 1	2.1	Live coral	108.2755899*	16.09736000*
Son Tra	Bai But 1	2.9	Live coral	108.2755299*	16.09718000*
Son Tra	Bai But 1	4.6	Live coral	108.2755299*	16.09701000*
Son Tra	Bai But 1	6.5	Live coral	108.2754499*	16.09693000*
Son Tra	Bai But 1	6	Live coral	108.2755099*	16.09697000*
Son Tra	Bai But 1	2.9	Live coral	108.2752599*	16.09722000*
Son Tra	Bai But 1	2.5	Live coral	108.2752799*	16.09734000*
Son Tra	Bai But 1	2.2	Live coral	108.2752599*	16.09744000*
Son Tra	Bai But 1	1.7	Live coral	108.2752599*	16.09754000*
Son Tra	Bai But 1	2	Live coral	108.2751199*	16.09759000*
Son Tra	Bai But 1	1.9	Live coral	108.2750899*	16.09750000*
Son Tra	Bai But 1	2.5	Live coral	108.2750499*	16.09738000*
Son Tra	Bai But 1	2.6	Live coral	108.2750299*	16.09732000*
Son Tra	Bai But 1	2.5	Live coral	108.2749299*	16.09735000*
Son Tra	Bai But 1	2.4	Live coral	108.2749599*	16.09741000*
Son Tra	Bai But 1	2.8	Live coral	108.2750099*	16.09734000*
Son Tra	Bai But 1	2.9	Live coral	108.2750599*	16.09728000*
Son Tra	Bai But 1	3.4	Live coral	108.2748599*	16.09704000*
Son Tra	Bai But 1	2.5	Live coral	108.2748599*	16.09712000*
Son Tra	Bai But 1	2.9	Live coral	108.2748599*	16.09719000*
Son Tra	Bai But 1	3	Live coral	108.2747999*	16.09721000*
Son Tra	Bai But 1	2.9	Live coral	108.2747799*	16.09714000*
Son Tra	Bai But 1	2.8	Live coral	108.2748299*	16.09716000*
Son Tra	Bai But 1	2.4	Live coral	108.2747999*	16.09731000*
Son Tra	Bai But 1	2.5	Live coral	108.2747999*	16.09743000*
Son Tra	Bai But 1	2.2	Live coral	108.2748299*	16.09752000*
Son Tra	Bai But 1	2	Live coral	108.2748899*	16.09762000*
Son Tra	Bai But 1	1.8	Live coral	108.2748899*	16.09769000*
Son Tra	Bai But 1	1.2	Live coral	108.2748599*	16.09780000*
Son Tra	Bai But 1	1	Live coral	108.2746999*	16.09787000*
Son Tra	Bai But 1	1.5	Live coral	108.2746399*	16.09774000*
Son Tra	Bai But 1	1.8	Live coral	108.2745899*	16.09762000*
Son Tra	Bai But 1	1.8	Live coral	108.2744899*	16.09765000*
Son Tra	Bai But 1	1.3	Live coral	108.2745499*	16.09773000*
Son Tra	Bai But 1	2.1	Live coral	108.2745399*	16.09769000*
Son Tra	Bai But 1	2.4	Live coral	108.2744799*	16.09746000*
Son Tra	Bai But 1	3.2	Live coral	108.2744599*	16.09735000*
Son Tra	Bai But 1	3.4	Live coral	108.2744399*	16.09725000*
Son Tra	Bai But 1	3.8	Live coral	108.2742699*	16.09682000*
Son Tra	Bai But 1	3.9	Live coral	108.2742799*	16.09675000*
Son Tra	Bai But 1	4.5	Live coral	108.2742199*	16.09682000*
Son Tra	Bai But 1	3.8	Live coral	108.2742499*	16.09693000*
Son Tra	Bai But 1	3.5	Live coral	108.2742499*	16.09709000*
Son Tra	Bai But 1	3	Live coral	108.2742599*	16.09725000*
Son Tra	Bai But 1	2	Live coral	108.2741499*	16.09740000*
Son Tra	Bai But 1	1.9	Live coral	108.2741499*	16.09749000*
Son Tra	Bai But 1	2	Live coral	108.2740599*	16.09751000*
Son Tra	Bai But 1	2.3	Live coral	108.2740799*	16.09742000*
Son Tra	Bai But 1	2	Live coral	108.2740899*	16.09744000*
Son Tra	Bai But 1	3.2	Live coral	108.2724799*	16.09716000*
Son Tra	Bai But 1	3.2	Live coral	108.2725299*	16.09726000*
Son Tra	Bai But 1	2.5	Live coral	108.2724999*	16.09733000*
Son Tra	Bai But 1	2.6	Live coral	108.2724599*	16.09735000*
Son Tra	Bai But 1	3	Live coral	108.2724499*	16.09725000*
Son Tra	Bai But 1	2.5	Live coral	108.2724499*	16.09728000*
Son Tra	Bai But 1	2.6	Live coral	108.2724799*	16.09742000*
Son Tra	Bai But 1	2.2	Live coral	108.2724699*	16.09758000*
Son Tra	Bai But 1	2.1	Live coral	108.2724499*	16.09769000*
Son Tra	Bai But 1	1.8	Live coral	108.2724699*	16.09777000*
Son Tra	Bai But 1	1.4	Live coral	108.2724199*	16.09789000*
Son Tra	Bai But 1	1.6	Live coral	108.2723299*	16.09787000*
Son Tra	Bai But 1	1.8	Live coral	108.2723599*	16.09777000*
Son Tra	Bai But 1	1.4	Live coral	108.2724499*	16.09794000*
Son Tra	Bai But 1	1.9	Live coral	108.2721699*	16.09797000*
Son Tra	Bai But 1	1.8	Live coral	108.2721099*	16.09786000*
Son Tra	Bai But 1	1.8	Live coral	108.2720899*	16.09780000*
Son Tra	Bai But 1	2.1	Live coral	108.2719999*	16.09776000*
Son Tra	Bai But 1	2	Live coral	108.2719799*	16.09780000*
Son Tra	Bai But 1	2	Live coral	108.2720399*	16.09779000*
Son Tra	Bai But 1	2.3	Live coral	108.2720199*	16.09766000*
Son Tra	Bai But 1	2.5	Live coral	108.2720599*	16.09747000*
Son Tra	Bai But 1	3.4	Live coral	108.2720899*	16.09722000*
Son Tra	Bai But 1	3.1	Live coral	108.2720599*	16.09712000*
Son Tra	Bai But 1	3.8	Live coral	108.2720599*	16.09706000*
Son Tra	Bai But 1	3.6	Live coral	108.2721299*	16.09708000*
Son Tra	Bai But 1	3.4	Live coral	108.2721499*	16.09717000*
Son Tra	Bai But 1	3.4	Live coral	108.2721099*	16.09710000*
Son Tra	Bai But 1	5	Live coral	108.2718799*	16.09711000*
Son Tra	Bai But 1	3.8	Live coral	108.2718699*	16.09718000*
Son Tra	Bai But 1	3.5	Live coral	108.2718399*	16.09729000*
Son Tra	Bai But 1	3.3	Live coral	108.2718299*	16.09738000*
Son Tra	Bai But 1	3	Live coral	108.2718199*	16.09749000*
Son Tra	Bai But 1	3.5	Live coral	108.2716899*	16.09744000*
Son Tra	Bai But 1	3.1	Live coral	108.2716899*	16.09755000*
Son Tra	Bai But 1	2.6	Live coral	108.2716999*	16.09762000*
Son Tra	Bai But 1	2	Live coral	108.2716999*	16.09773000*
Son Tra	Bai But 1	2.5	Live coral	108.2716399*	16.09785000*
Son Tra	Bai Nom	3.8	Live coral	108.3004499*	16.09878000*
Son Tra	Bai Nom	3.4	Live coral	108.3005099*	16.09880000*
Son Tra	Bai Nom	2	Live coral	108.3005799*	16.09883000*
Son Tra	Bai Nom	3.2	Live coral	108.3006099*	16.09876000*
Son Tra	Bai Nom	4	Live coral	108.3005699*	16.09870000*
Son Tra	Bai Nom	2.8	Live coral	108.3005399*	16.09878000*
Son Tra	Bai Nom	2.4	Live coral	108.3006699*	16.09871000*
Son Tra	Bai Nom	3.4	Live coral	108.3006499*	16.09859000*
Son Tra	Bai Nom	3.8	Live coral	108.3005399*	16.09851000*
Son Tra	Bai Nom	2	Live coral	108.3007799*	16.09858000*
Son Tra	Bai Nom	2.6	Live coral	108.3008499*	16.09871000*
Son Tra	Bai Nom	1.6	Live coral	108.3009599*	16.09867000*
Son Tra	Bai Nom	1.4	Live coral	108.3009799*	16.09873000*
Son Tra	Bai Nom	1.4	Live coral	108.3009899*	16.09862000*
Son Tra	Bai Nom	2	Live coral	108.3010899*	16.09849000*
Son Tra	Bai Nom	2.6	Live coral	108.3009599*	16.09841000*
Son Tra	Bai Nom	3.8	Live coral	108.3008599*	16.09827000*
Son Tra	Bai Nom	3.7	Live coral	108.3010299*	16.09821000*
Son Tra	Bai Nom	2.8	Live coral	108.3011899*	16.09837000*
Son Tra	Bai Nom	2.1	Live coral	108.3013299*	16.09844000*
Son Tra	Bai Nom	2.7	Live coral	108.3013999*	16.09804000*
Son Tra	Bai Nom	2.1	Live coral	108.3016999*	16.09783000*
Son Tra	Bai Nom	2.4	Live coral	108.3019599*	16.09764000*
Son Tra	Bai Nom	1.8	Live coral	108.3023999*	16.09734000*
Son Tra	Bai Nom	2.1	Live coral	108.3024099*	16.09728000*
Son Tra	Bai Nom	1.6	Live coral	108.2998999*	16.10270000*
Son Tra	Bai Nom	1.3	Live coral	108.2999299*	16.10275000*
Son Tra	Bai Nom	1.3	Live coral	108.2999399*	16.10267000*
Son Tra	Bai Nom	1.3	Live coral	108.2998999*	16.10269000*
Son Tra	Bai Nom	1.3	Live coral	108.2998299*	16.10263000*
Son Tra	Bai Nom	1.9	Live coral	108.2995999*	16.10262000*
Son Tra	Bai Nom	2.1	Live coral	108.2955999*	16.10252000*
Son Tra	Bai Nom	1.6	Live coral	108.2997299*	16.10246000*
Son Tra	Bai Nom	1.1	Live coral	108.2999999*	16.10237000*
Son Tra	Bai Nom	1.6	Live coral	108.2998799*	16.10229000*
Son Tra	Bai Nom	1.4	Live coral	108.2997799*	16.10220000*
Son Tra	Bai Nom	2	Live coral	108.2996299*	16.10217000*
Son Tra	Bai Nom	2.2	Live coral	108.2994999*	16.10210000*
Son Tra	Bai Nom	2.4	Live coral	108.2994399*	16.10215000*
Son Tra	Bai Nom	2.4	Live coral	108.2993999*	16.10214000*
Son Tra	Bai Nom	2.3	Live coral	108.2994499*	16.10208000*
Son Tra	Bai Nom	2.3	Live coral	108.2994499*	16.10211000*
Son Tra	Bai Nom	3	Live coral	108.2993199*	16.10207000*
Son Tra	Bai Nom	2.4	Live coral	108.2993899*	16.10200000*
Son Tra	Bai Nom	2.5	Live coral	108.2993199*	16.10188000*
Son Tra	Bai Nom	4.2	Live coral	108.2991799*	16.10181000*
Son Tra	Bai Nom	5.2	Live coral	108.2990399*	16.10182000*
Son Tra	Bai Nom	2.8	Live coral	108.2993299*	16.10171000*
Son Tra	Bai Nom	1.6	Live coral	108.2994399*	16.10182000*
Son Tra	Bai Nom	1.9	Live coral	108.2994799*	16.10195000*
Son Tra	Bai Nom	1.6	Live coral	108.2996699*	16.10202000*
Son Tra	Bai Nom	1.2	Live coral	108.2997399*	16.10205000*
Son Tra	Bai Nom	1.1	Live coral	108.2998499*	16.10208000*
Son Tra	Bai Nom	1	Live coral	108.2998999*	16.10215000*
Son Tra	Bai Nom	1.1	Live coral	108.2999799*	16.10222000*
Son Tra	Bai Nom	0.5	Live coral	108.2999799*	16.10189000*
Son Tra	Bai Nom	0.9	Live coral	108.2998899*	16.10189000*
Son Tra	Bai Nom	1	Live coral	108.2997599*	16.10187000*
Son Tra	Bai Nom	0.9	Live coral	108.2996999*	16.10184000*
Son Tra	Bai Nom	0.7	Live coral	108.2996499*	16.10179000*
Son Tra	Bai Nom	1.3	Live coral	108.2995199*	16.10166000*
Son Tra	Bai Nom	2	Live coral	108.2994699*	16.10160000*
Son Tra	Bai Nom	1.9	Live coral	108.2994999*	16.10158000*
Son Tra	Bai Nom	1.8	Live coral	108.2994799*	16.10154000*
Son Tra	Bai Nom	1.7	Live coral	108.2993999*	16.10158000*
Son Tra	Bai Nom	2	Live coral	108.2994999*	16.10160000*
Son Tra	Bai Nom	2.5	Live coral	108.2993999*	16.10159000*
Son Tra	Bai Nom	3.2	Live coral	108.2992899*	16.10153000*
Son Tra	Bai Nom	6.1	Live coral	108.2992099*	16.10147000*
Son Tra	Bai Nom	2.3	Live coral	108.2993499*	16.10158000*
Son Tra	Bai Nom	1.7	Live coral	108.2994799*	16.10165000*
Son Tra	Bai Nom	1.3	Live coral	108.2995799*	16.10166000*
Son Tra	Bai Nom	1.1	Live coral	108.2995499*	16.10156000*
Son Tra	Bai Nom	1.9	Live coral	108.2994899*	16.10146000*
Son Tra	Bai Nom	2.2	Live coral	108.2994499*	16.10142000*
Son Tra	Bai Nom	2.5	Live coral	108.2993499*	16.10136000*
Son Tra	Bai Nom	3.1	Live coral	108.2993499*	16.10126000*
Son Tra	Bai Nom	4.9	Live coral	108.2992499*	16.10119000*
Son Tra	Bai Nom	4.7	Live coral	108.2992699*	16.10117000*
Son Tra	Bai Nom	4.3	Live coral	108.2992999*	16.10125000*
Son Tra	Bai Nom	4.7	Live coral	108.2992499*	16.10126000*
Son Tra	Bai Nom	2	Live coral	108.2995399*	16.10112000*
Son Tra	Bai Nom	0.9	Live coral	108.2997699*	16.10121000*
Son Tra	Bai Nom	0.8	Live coral	108.2998399*	16.10122000*
Son Tra	Bai Nom	0.9	Live coral	108.2999399*	16.10116000*
Son Tra	Bai Nom	1.3	Live coral	108.2998399*	16.10109000*
Son Tra	Bai Nom	1.4	Live coral	108.2997699*	16.10098000*
Son Tra	Bai Nom	1.3	Live coral	108.2995899*	16.10097000*
Son Tra	Bai Nom	2.2	Live coral	108.2995099*	16.10081000*
Son Tra	Bai Nom	4.2	Live coral	108.2994499*	16.10069000*
Son Tra	Bai Nom	1.8	Live coral	108.2996099*	16.10072000*
Son Tra	Bai Nom	1.9	Live coral	108.2997499*	16.10080000*
Son Tra	Bai Nom	1	Live coral	108.2997999*	16.10089000*
Son Tra	Bai Nom	0.9	Live coral	108.2998699*	16.10086000*
Son Tra	Bai Nom	1	Live coral	108.2998999*	16.10086000*
Son Tra	Bai Nom	0.9	Live coral	108.2998799*	16.10087000*
Son Tra	Bai Nom	1.2	Live coral	108.2998999*	16.10065000*
Son Tra	Bai Nom	1.1	Live coral	108.2999199*	16.10047000*
Son Tra	Bai Nom	0.8	Live coral	108.2999799*	16.10040000*
Son Tra	5	1.9	Live coral	108.2997699*	16.10040000*
Son Tra	Bai Nom	3.1	Live coral	108.2995799*	16.10045000*
Son Tra	Bai Nom	4.1	Live coral	108.2995499*	16.10041000*
Son Tra	Bai Nom	3.4	Live coral	108.2995899*	16.10038000*
Son Tra	Bai Nom	2.8	Live coral	108.2996399*	16.10040000*
Son Tra	Bai Nom	3.8	Live coral	108.2996699*	16.10016000*
Son Tra	Bai Nom	3.1	Live coral	108.2997399*	16.10004000*
Son Tra	Bai Nom	4.3	Live coral	108.2996699*	16.09989000*
Son Tra	Bai Nom	1.9	Live coral	108.2997799*	16.10002000*
Son Tra	Bai Nom	1.4	Live coral	108.2998799*	16.10016000*
Son Tra	Bai Nom	1.1	Live coral	108.2999299*	16.10023000*
Son Tra	Bai Nom	1.3	Live coral	108.3000299*	16.10002000*
Son Tra	Bai Nom	0.9	Live coral	108.3000499*	16.09995000*
Son Tra	Bai Nom	1.2	Live coral	108.3000499*	16.09982000*
Son Tra	Bai Nom	2.2	Live coral	108.2998699*	16.09974000*
Son Tra	Bai Nom	1.7	Live coral	108.2999299*	16.09969000*
Son Tra	Bai Nom	1.8	Live coral	108.2998599*	16.09966000*
Son Tra	Bai Nom	2	Live coral	108.2998829*	16.09969000*
Son Tra	Bai Nom	2.5	Live coral	108.2998999*	16.09971000*
Son Tra	Bai Nom	1.3	Live coral	108.3000499*	16.09975000*
Son Tra	Bai Nom	1.6	Live coral	108.3001099*	16.09977000*
Son Tra	Bai Nom	1.2	Live coral	108.3001899*	16.09963000*
Son Tra	Bai Nom	0.9	Live coral	108.3002799*	16.09950000*
Son Tra	Bai Nom	1.6	Live coral	108.3002099*	16.09939000*
Son Tra	Bai Nom	1.9	Live coral	108.3002599*	16.09934000*
Son Tra	Bai Nom	1.8	Live coral	108.3001899*	16.09929000*
Son Tra	Bai Nom	2.3	Live coral	108.3001299*	16.09936000*
Son Tra	Bai Nom	2.2	Live coral	108.3001899*	16.09937000*
Son Tra	Bai Nom	2.2	Live coral	108.3001299*	16.09931000*
Son Tra	Bai Nom	4	Live coral	108.3000199*	16.09919000*
Son Tra	Bai U	8.8	Live coral	108.3229799*	16.11571000*
Son Tra	Bai U	5.2	Live coral	108.3229999*	16.11584000*
Son Tra	Bai U	2.2	Live coral	108.3228499*	16.11597000*
Son Tra	Bai U	4.3	Live coral	108.3228699*	16.11590000*
Son Tra	Bai U	4.6	Live coral	108.3227599*	16.11594000*
Son Tra	Bai U	3	Live coral	108.3227699*	16.11600000*
Son Tra	Bai U	2.7	Live coral	108.3228299*	16.11596000*
Son Tra	Bai U	4.5	Live coral	108.3226599*	16.11591000*
Son Tra	Bai U	4.2	Live coral	108.3225299*	16.11600000*
Son Tra	Bai U	5.9	Live coral	108.3223599*	16.11583000*
Son Tra	Bai U	4.2	Live coral	108.3221099*	16.11594000*
Son Tra	Bai U	3.5	Live coral	108.3219199*	16.11603000*
Son Tra	Bai U	3.8	Live coral	108.3218799*	16.11596000*
Son Tra	Bai U	4.1	Live coral	108.3218399*	16.11595000*
Son Tra	Bai U	3.8	Live coral	108.3218299*	16.11603000*
Son Tra	Bai U	4.2	Live coral	108.3218699*	16.11598000*
Son Tra	Bai U	3.8	Live coral	108.3216399*	16.11617000*
Son Tra	Bai U	3.2	Live coral	108.3215199*	16.11628000*
Son Tra	Bai U	2.5	Live coral	108.3213299*	16.11626000*
Son Tra	Bai U	1.9	Live coral	108.3211899*	16.11639000*
Son Tra	Bai U	1.8	Live coral	108.3210899*	16.11641000*
Son Tra	Bai U	1.2	Live coral	108.3211099*	16.11645000*
Son Tra	Bai U	1.8	Live coral	108.3211999*	16.11646000*
Son Tra	Bai U	2	Live coral	108.3211299*	16.11640000*
Son Tra	Bai U	3.1	Live coral	108.3209699*	16.11627000*
Son Tra	Bai U	3.8	Live coral	108.3208499*	16.11610000*
Son Tra	Bai U	5.2	Live coral	108.3204999*	16.11600000*
Son Tra	Bai U	2.8	Live coral	108.3203599*	16.11611000*
Son Tra	Dong bai bac	5.2	Live coral	108.3095199*	16.12998000*
Son Tra	Dong bai bac	4.2	Live coral	108.3095299*	16.12951000*
Son Tra	Dong bai bac	5	Live coral	108.3094499*	16.12928000*
Son Tra	Dong bai bac	5.3	Live coral	108.3094799*	16.12892000*
Son Tra	Dong bai bac	5.2	Live coral	108.3100199*	16.13234000*
Son Tra	Dong bai bac	4.6	Live coral	108.3105599*	16.13308000*
Son Tra	Dong bai bac	4.8	Live coral	108.3106799*	16.13314000*
Son Tra	Dong bai bac	4.2	Live coral	108.3107799*	16.13312000*
Son Tra	Dong bai bac	4.9	Live coral	108.3107799*	16.13318000*
Son Tra	Dong bai bac	5.2	Live coral	108.3107299*	16.13321000*
Son Tra	Dong bai bac	4	Live coral	108.3107299*	16.13315000*
Son Tra	Dong bai bac	3.6	Live coral	108.3107799*	16.13304000*
Son Tra	Dong bai bac	2.7	Live coral	108.3109699*	16.13331000*
Son Tra	Dong bai bac	4.7	Live coral	108.3109499*	16.13350000*
Son Tra	Dong bai bac	5.2	Live coral	108.3109499*	16.13358000*
Son Tra	Dong bai bac	6.1	Live coral	108.3108999*	16.13363000*
Son Tra	Dong bai bac	6	Live coral	108.3108399*	16.13354000*
Son Tra	Dong bai bac	4.5	Live coral	108.3109099*	16.13353000*
Son Tra	Dong bai bac	6.5	Live coral	108.3111599*	16.13390000*
Son Tra	Dong bai bac	4.8	Live coral	108.3113299*	16.13400000*
Son Tra	Dong bai bac	3.7	Live coral	108.3113599*	16.13397000*
Son Tra	Dong bai bac	3.4	Live coral	108.3113899*	16.13407000*
Son Tra	Dong bai bac	5.4	Live coral	108.3113299*	16.13411000*
Son Tra	Dong bai bac	4.8	Live coral	108.3113199*	16.13407000*
Son Tra	Dong bai bac	5.2	Live coral	108.3114099*	16.13421000*
Son Tra	Dong bai bac	6.8	Live coral	108.3113899*	16.13436000*
Son Tra	Dong bai bac	6.6	Live coral	108.3114199*	16.13449000*
Son Tra	Dong bai bac	4.4	Live coral	108.3115299*	16.13450000*
Son Tra	Dong bai bac	2.3	Live coral	108.3116499*	16.13453000*
Son Tra	Dong bai bac	3	Live coral	108.3117099*	16.13476000*
Son Tra	Dong bai bac	4.2	Live coral	108.3117099*	16.13482000*
Son Tra	Dong bai bac	4.6	Live coral	108.3116499*	16.13484000*
Son Tra	Dong bai bac	6.1	Live coral	108.3116099*	16.13478000*
Son Tra	Dong bai bac	3.9	Live coral	108.3116899*	16.13480000*
Son Tra	Dong bai bac	14	Live coral	108.3120799*	16.13594000*
Son Tra	Dong Bai Bac	2.7	Live coral	108.3123999*	16.13675000*
Son Tra	Dong Bai Bac	4.4	Live coral	108.3122999*	16.13688000*
Son Tra	Dong Bai Bac	2.3	Live coral	108.3123999*	16.13689000*
Son Tra	Dong Bai Bac	1.9	Live coral	108.3123599*	16.13705000*
Son Tra	Dong Bai Bac	1.9	Live coral	108.3123099*	16.13714000*
Son Tra	Dong Bai Bac	3.4	Live coral	108.3122799*	16.13709000*
Son Tra	Dong Bai Bac	5	Live coral	108.3121999*	16.13722000*
Son Tra	Dong Bai Bac	4	Live coral	108.3121899*	16.13734000*
Son Tra	Dong Bai Bac	1.6	Live coral	108.3123099*	16.13732000*
Son Tra	Dong Bai Bac	2.1	Live coral	108.3122899*	16.13743000*
Son Tra	Dong Bai Bac	2.4	Live coral	108.3121999*	16.13747000*
Son Tra	Dong Bai Bac	2.9	Live coral	108.3121999*	16.13756000*
Son Tra	Dong Bai Bac	5	Live coral	108.3121599*	16.13754000*
Son Tra	Dong Bai Bac	1.9	Live coral	108.3122899*	16.13754000*
Son Tra	Dong Bai Bac	1.6	Live coral	108.3122399*	16.13768000*
Son Tra	Dong Bai Bac	4	Live coral	108.3121599*	16.13769000*
Son Tra	Dong Bai Bac	2.3	Live coral	108.3122199*	16.13777000*
Son Tra	Dong Bai Bac	2.6	Live coral	108.3121899*	16.13770000*
Son Tra	Dong Bai Bac	3	Live coral	108.3121599*	16.13787000*
Son Tra	Dong Bai Bac	1.6	Live coral	108.3122499*	16.13788000*
Son Tra	Dong Bai Bac	1.6	Live coral	108.3122299*	16.13799000*
Son Tra	Dong Bai Bac	3.2	Live coral	108.3121499*	16.13807000*
Son Tra	Dong Bai Bac	3.7	Live coral	108.3121299*	16.13819000*
Son Tra	Dong Bai Bac	2.3	Live coral	108.3122199*	16.13820000*
Son Tra	Dong Bai Bac	2	Live coral	108.3122299*	16.13831000*
Son Tra	Dong Bai Bac	3	Live coral	108.3121599*	16.13834000*
Son Tra	Dong Bai Bac	3.8	Live coral	108.3121499*	16.13841000*
Son Tra	Dong Bai Bac	2.1	Live coral	108.3122299*	16.13842000*
Son Tra	Dong Bai Bac	2.9	Live coral	108.3121899*	16.13837000*
Son Tra	Dong Bai Bac	3.8	Live coral	108.3120699*	16.13923000*
Son Tra	Dong Bai Bac	1.6	Live coral	108.3122099*	16.13924000*
Son Tra	Dong Bai Bac	1.8	Live coral	108.3122299*	16.13939000*
Son Tra	Dong Bai Bac	2.8	Live coral	108.3121599*	16.13940000*
Son Tra	Dong Bai Bac	2.4	Live coral	108.3121699*	16.13947000*
Son Tra	Dong Bai Bac	2.1	Live coral	108.3122399*	16.13947000*
Son Tra	Dong Bai Bac	2.6	Live coral	108.3121899*	16.13943000*
Son Tra	Dong Bai Bac	1.9	Live coral	108.3122099*	16.13963000*
Son Tra	Dong Bai Bac	3.2	Live coral	108.3120899*	16.13966000*
Son Tra	Dong Bai Bac	5.9	Live coral	108.3118999*	16.13977000*
Son Tra	Dong Bai Bac	2.8	Live coral	108.3119499*	16.13989000*
Son Tra	Dong Bai Bac	3	Live coral	108.3120299*	16.13988000*
Son Tra	Dong Bai Bac	2.7	Live coral	108.3121099*	16.13990000*
Son Tra	Dong Bai Bac	2.5	Live coral	108.3122099*	16.13988000*
Son Tra	Dong Bai Bac	2.2	Live coral	108.3121999*	16.13999000*
Son Tra	Dong Bai Bac	2.8	Live coral	108.3121299*	16.13998000*
Son Tra	Dong Bai Bac	2.5	Live coral	108.3121599*	16.13995000*
Son Tra	Dong Bai Bac	2.2	Live coral	108.3122299*	16.14004000*
Son Tra	Dong Bai Bac	2.3	Live coral	108.3122199*	16.14017000*
Son Tra	Dong Bai Bac	2.5	Live coral	108.3121099*	16.14020000*
Son Tra	Dong Bai Bac	2.6	Live coral	108.3119699*	16.14022000*
Son Tra	Dong Bai Bac	4.8	Live coral	108.3118499*	16.14022000*
Son Tra	Dong Bai Bac	3	Live coral	108.3143199*	16.14273000*
Son Tra	Dong Bai Bac	2.4	Live coral	108.3143799*	16.14265000*
Son Tra	Dong Bai Bac	2.2	Live coral	108.3144499*	16.14275000*
Son Tra	Dong Bai Bac	3.8	Live coral	108.3143499*	16.14281000*
Son Tra	Dong Bai Bac	3.1	Live coral	108.3143899*	16.14283000*
Son Tra	Dong Bai Bac	3.9	Live coral	108.3143299*	16.14282000*
Son Tra	Dong Bai Bac	2.8	Live coral	108.3145099*	16.14290000*
Son Tra	Dong Bai Bac	5.2	Live coral	108.3141599*	16.14311000*
Son Tra	Dong Bai Bac	5	Live coral	108.3143799*	16.14311000*
Son Tra	Dong Bai Bac	2.9	Live coral	108.3145099*	16.14301000*
Son Tra	Hon Lo	5.1	Live coral	108.3138899*	16.11193000*
Son Tra	Hon Lo	4.5	Live coral	108.3139599*	16.11205000*
Son Tra	Hon Lo	3	Live coral	108.3139599*	16.11211000*
Son Tra	Hon Lo	3.4	Live coral	108.3138999*	16.11211000*
Son Tra	Hon Lo	3.8	Live coral	108.3139199*	16.11203000*
Son Tra	Hon Lo	3.6	Live coral	108.3139299*	16.11206000*
Son Tra	Hon Lo	4.1	Live coral	108.3140499*	16.11214000*
Son Tra	Hon Lo	3.9	Live coral	108.3141699*	16.11229000*
Son Tra	Hon Lo	2.2	Live coral	108.3140699*	16.11234000*
Son Tra	Hon Lo	2.1	Live coral	108.3138999*	16.11233000*
Son Tra	Hon Lo	3.7	Live coral	108.3138399*	16.11224000*
Son Tra	Hon Lo	3.6	Live coral	108.3136799*	16.11222000*
Son Tra	Hon Lo	2.1	Live coral	108.3136799*	16.11228000*
Son Tra	Hon Lo	2.6	Live coral	108.3136299*	16.11227000*
Son Tra	Hon Lo	2.2	Live coral	108.3136099*	16.11220000*
Son Tra	Hon Lo	2.2	Live coral	108.3136299*	16.11223000*
Son Tra	Hon Lo	3.4	Live coral	108.3136099*	16.11209000*
Son Tra	Hon Lo	5.8	Live coral	108.3135399*	16.11198000*
Son Tra	Hon Lo	3.4	Live coral	108.3133299*	16.11215000*
Son Tra	Hon Lo	2.2	Live coral	108.3132899*	16.11226000*
Son Tra	Hon Lo	2	Live coral	108.3132299*	16.11246000*
Son Tra	Hon Lo	1.2	Live coral	108.3131499*	16.11245000*
Son Tra	Hon Lo	1.5	Live coral	108.3129899*	16.11251000*
Son Tra	Hon Lo	1.2	Live coral	108.3129899*	16.11256000*
Son Tra	Hon Lo	1.6	Live coral	108.3129399*	16.11255000*
Son Tra	Hon Lo	2	Live coral	108.3129199*	16.11248000*
Son Tra	Hon Lo	2.2	Live coral	108.3129399*	16.11251000*
Son Tra	Hon Lo	2.1	Live coral	108.3130099*	16.11233000*
Son Tra	Hon Lo	5.8	Live coral	108.3130199*	16.11213000*
Son Tra	Hon Lo	7.3	Live coral	108.3128699*	16.11201000*
Son Tra	Hon Lo	6.2	Live coral	108.3127499*	16.11205000*
Son Tra	Hon Lo	5.4	Live coral	108.3127399*	16.11211000*
Son Tra	Hon Lo	5.2	Live coral	108.3126799*	16.11212000*
Son Tra	Hon Lo	5.6	Live coral	108.3126799*	16.11209000*
Son Tra	Hon Lo	5.3	Live coral	108.3126899*	16.11208000*
Son Tra	Hon Lo	4.1	Live coral	108.3126699*	16.11220000*
Son Tra	Hon Lo	2.5	Live coral	108.3126399*	16.11241000*
Son Tra	Hon Lo	2	Live coral	108.3126299*	16.11257000*
Son Tra	Hon Lo	2.3	Live coral	108.3125499*	16.11253000*
Son Tra	Hon Lo	2.3	Live coral	108.3124599*	16.11243000*
Son Tra	Hon Lo	4.1	Live coral	108.3124399*	16.11224000*
Son Tra	Hon Lo	5.5	Live coral	108.3124099*	16.11204000*
Son Tra	Hon Lo	7.2	Live coral	108.3125199*	16.11185000*
Son Tra	Hon Lo	6.8	Live coral	108.3123599*	16.11181000*
Son Tra	Hon Lo	4.7	Live coral	108.3122899*	16.11193000*
Son Tra	Hon Lo	5.2	Live coral	108.3122999*	16.11206000*
Son Tra	Hon Lo	4.6	Live coral	108.3120999*	16.11203000*
Son Tra	Hon Lo	3.4	Live coral	108.3118399*	16.11213000*
Son Tra	Hon Lo	2.8	Live coral	108.3117099*	16.11207000*
Son Tra	Hon Lo	3.9	Live coral	108.3117399*	16.11200000*
Son Tra	Hon Lo	3.6	Live coral	108.3117699*	16.11205000*
Son Tra	Hon Lo	4.3	Live coral	108.3118299*	16.11199000*
Son Tra	Hon Lo	4.1	Live coral	108.3118199*	16.11194000*
Son Tra	Hon Lo	3.4	Live coral	108.3117599*	16.11197000*
Son Tra	Hon Lo	4	Live coral	108.3118399*	16.11190000*
Son Tra	Hon Lo	5.7	Live coral	108.3119499*	16.11185000*
Son Tra	Hon Lo	5.9	Live coral	108.3121099*	16.11180000*
Son Tra	Hon Lo	8.2	Live coral	108.3119799*	16.11166000*
Son Tra	Hon Lo	6	Live coral	108.3118399*	16.11177000*
Son Tra	Hon Lo	4.7	Live coral	108.3116099*	16.11195000*
Son Tra	Hon Lo	2.3	Live coral	108.3114599*	16.11205000*
Son Tra	Hon Lo	4.6	Live coral	108.3115299*	16.11168000*
Son Tra	Hon Lo	4.9	Live coral	108.3116499*	16.11160000*
Son Tra	Hon Lo	5.4	Live coral	108.3116099*	16.11149000*
Son Tra	Hon Lo	6.2	Live coral	108.3116799*	16.11149000*
Son Tra	Hon Lo	5.9	Live coral	108.3115799*	16.11143000*
Son Tra	Hon Lo	5.6	Live coral	108.3116099*	16.11147000*
Son Tra	Hon Lo	4.4	Live coral	108.3114599*	16.11156000*
Son Tra	Hon Lo	3.8	Live coral	108.3112599*	16.11160000*
Son Tra	Hon Lo	5.5	Live coral	108.3112499*	16.11089000*
Son Tra	Hon Lo	5.6	Live coral	108.3109699*	16.11058000*
Son Tra	Hon Lo	5.8	Live coral	108.3108999*	16.11041000*
Son Tra	Hon Lo	4.7	Live coral	108.3106699*	16.11035000*
Son Tra	Hon Lo	3.8	Live coral	108.3104399*	16.11023000*
Son Tra	Mui Nghe	4.5	Live coral	108.3322999*	16.11800000*
Son Tra	Mui Nghe	6.9	Live coral	108.3324099*	16.11785000*
Son Tra	Mui Nghe	12	Live coral	108.3322699*	16.11779000*
Son Tra	Mui Nghe	8.7	Live coral	108.2999899*	16.09753000*
Son Tra	Mui Nghe	4.5	Live coral	108.2906699*	16.09706000*
Son Tra	Mui Nghe	3.8	Live coral	108.3349299*	16.11805000*
Son Tra	Mui Nghe	2.4	Live coral	108.3348799*	16.11810000*
Son Tra	Mui Nghe	2	Live coral	108.3349599*	16.11811000*
Son Tra	Mui Nghe	2.1	Live coral	108.3349199*	16.11818000*
Son Tra	Mui Nghe	2.1	Live coral	108.3348499*	16.11818000*
Son Tra	Mui Nghe	2.5	Live coral	108.3348899*	16.11814000*
Son Tra	Mui Nghe	3	Live coral	108.3347199*	16.11813000*
Son Tra	Mui Nghe	2.3	Live coral	108.3345899*	16.11826000*
Son Tra	Mui Nghe	2.3	Live coral	108.3344699*	16.11819000*
Son Tra	Mui Nghe	4.3	Live coral	108.3343699*	16.11811000*
Son Tra	Mui Nghe	7.5	Live coral	108.3342999*	16.11802000*
Son Tra	Mui Nghe	3.5	Live coral	108.3342399*	16.11818000*
Son Tra	Mui Nghe	4.3	Live coral	108.3341499*	16.11819000*
Son Tra	Mui Nghe	6.3	Live coral	108.3341799*	16.11811000*
Son Tra	Mui Nghe	5.4	Live coral	108.3342099*	16.11817000*
Son Tra	Mui Nghe	2.6	Live coral	108.3341099*	16.11832000*
Son Tra	Mui Nghe	3.4	Live coral	108.3339499*	16.11835000*
Son Tra	Mui Nghe	3.3	Live coral	108.3338199*	16.11829000*
Son Tra	Mui Nghe	2.3	Live coral	108.3336699*	16.11834000*
Son Tra	Mui Nghe	5.1	Live coral	108.3336599*	16.11822000*
Son Tra	Mui Nghe	5.8	Live coral	108.3336599*	16.11810000*
Son Tra	Mui Nghe	4.1	Live coral	108.3335599*	16.11818000*
Son Tra	Mui Nghe	4.8	Live coral	108.3333999*	16.11818000*
Son Tra	Mui Nghe	2.9	Live coral	108.3332799*	16.11825000*
Son Tra	Mui Nghe	2.8	Live coral	108.3330799*	16.11831000*
Son Tra	Mui Nghe	3.8	Live coral	108.3329299*	16.11826000*
Son Tra	Mui Nghe	3.9	Live coral	108.3328899*	16.11826000*
Son Tra	Mui Nghe	4.4	Live coral	108.3329399*	16.11819000*
Son Tra	Mui Nghe	4	Live coral	108.3320199*	16.11819000*
Son Tra	Mui Nghe	3.7	Live coral	108.3329499*	16.11826000*
Son Tra	Mui Nghe	4.3	Live coral	108.3328899*	16.11816000*
Son Tra	Mui Nghe	4.7	Live coral	108.3327499*	16.11808000*
Son Tra	Mui Nghe	4.7	Live coral	108.3325699*	16.11818000*
Son Tra	Mui Nghe	2.9	Live coral	108.3323099*	16.11825000*
Son Tra	Mui Nghe	2.7	Live coral	108.3321799*	16.11811000*
Son Tra	Mui Nghe	3.1	Live coral	108.3321499*	16.11811000*
Son Tra	Mui Nghe	1.9	Live coral	108.3321299*	16.11815000*
Son Tra	Mui Nghe	3.1	Live coral	108.3321899*	16.11818000*
Son Tra	Mui Nghe	3.7	Live coral	108.3322299*	16.11812000*
Son Tra	Mui Nghe	4.7	Live coral	108.3286199*	16.11523000*
Son Tra	Mui Nghe	4.3	Live coral	108.3281499*	16.11555000*
Son Tra	Mui Nghe	3.4	Live coral	108.3280699*	16.11552000*
Son Tra	Mui Nghe	4.1	Live coral	108.3280899*	16.11544000*
Son Tra	Mui Nghe	4.2	Live coral	108.3281599*	16.11544000*
Son Tra	Mui Nghe	4.5	Live coral	108.3281399*	16.11550000*
Son Tra	Mui Nghe	4.1	Live coral	108.3278799*	16.11546000*
Son Tra	Mui Nghe	7.6	Live coral	108.3278399*	16.11534000*
Son Tra	Mui Nghe	3.6	Live coral	108.3276199*	16.11540000*
Son Tra	Mui Nghe	4.2	Live coral	108.3274399*	16.11547000*
Son Tra	Mui Nghe	3.7	Live coral	108.3272899*	16.11551000*
Son Tra	Mui Nghe	3.9	Live coral	108.3272599*	16.11558000*
Son Tra	Mui Nghe	3.1	Live coral	108.3271699*	16.11553000*
Son Tra	Mui Nghe	3.2	Live coral	108.3272099*	16.11558000*
Son Tra	Mui Nghe	3.3	Live coral	108.3272499*	16.11553000*
Son Tra	Mui Nghe	4.4	Live coral	108.3272299*	16.11540000*
Son Tra	Mui Nghe	8.8	Live coral	108.3271199*	16.11514000*
Son Tra	Mui Nghe	3.9	Live coral	108.3267699*	16.11520000*
Son Tra	Mui Nghe	5.1	Live coral	108.3264199*	16.11521000*
Son Tra	Mui Nghe	3.8	Live coral	108.3261099*	16.11514000*
Son Tra	Mui Nghe	4	Live coral	108.3257099*	16.11515000*
Son Tra	Mui Nghe	3.5	Live coral	108.3256099*	16.11530000*
Son Tra	Mui Nghe	3.1	Live coral	108.3256099*	16.11537000*
Son Tra	Mui Nghe	3.1	Live coral	108.3255199*	16.11537000*
Son Tra	Mui Nghe	3.7	Live coral	108.3255199*	16.11532000*
Son Tra	Mui Nghe	3.2	Live coral	108.3255799*	16.11536000*
Son Tra	Mui Nghe	2.2	Live coral	108.3254899*	16.11544000*
Son Tra	Mui Nghe	1.9	Live coral	108.3253899*	16.11555000*
Son Tra	Mui Nghe	2.1	Live coral	108.3252999*	16.11559000*
Son Tra	Mui Nghe	1.7	Live coral	108.3251799*	16.11562000*
Son Tra	Mui Nghe	2.3	Live coral	108.3251599*	16.11568000*
Son Tra	Mui Nghe	2.2	Live coral	108.3250799*	16.11566000*
Son Tra	Mui Nghe	2.7	Live coral	108.3250699*	16.11558000*
Son Tra	Mui Nghe	2.7	Live coral	108.3251599*	16.11556000*
Son Tra	Mui Nghe	2	Live coral	108.3251299*	16.11565000*
Son Tra	Mui Nghe	3.8	Live coral	108.3250899*	16.11548000*
Son Tra	Mui Nghe	9.2	Live coral	108.3250999*	16.11331000*
Son Tra	Mui Sung	3.7	Live coral	108.3052099*	16.09560000*
Son Tra	Mui Sung	3.5	Live coral	108.3052899*	16.09557000*
Son Tra	Mui Sung	3.5	Live coral	108.3053099*	16.09562000*
Son Tra	Mui Sung	3.2	Live coral	108.3052699*	16.09567000*
Son Tra	Mui Sung	3.1	Live coral	108.3052699*	16.09560000*
Son Tra	Mui Sung	3.5	Live coral	108.3053699*	16.09572000*
Son Tra	Mui Sung	2.5	Live coral	108.3054699*	16.09585000*
Son Tra	Mui Sung	3.1	Live coral	108.3056099*	16.09585000*
Son Tra	Mui Sung	1.6	Live coral	108.3057299*	16.09586000*
Son Tra	Mui Sung	1.2	Live coral	108.3058099*	16.09585000*
Son Tra	Mui Sung	2.7	Live coral	108.3058399*	16.09575000*
Son Tra	Mui Sung	3.1	Live coral	108.3057399*	16.09574000*
Son Tra	Mui Sung	2.4	Live coral	108.3057599*	16.09581000*
Son Tra	Mui Sung	3.6	Live coral	108.3057899*	16.09567000*
Son Tra	Mui Sung	4.4	Live coral	108.3058699*	16.09553000*
Son Tra	Mui Sung	4.7	Live coral	108.3017999*	16.09724000*
Son Tra	Tay Bai Bac	5.4	Live coral	108.2991699*	16.12720000*
Son Tra	Tay Bai Bac	4.1	Live coral	108.2991399*	16.12715000*
Son Tra	Tay Bai Bac	7.5	Live coral	108.2992599*	16.12714000*
Son Tra	Tay Bai Bac	8.6	Live coral	108.2992599*	16.12721000*
Son Tra	Tay Bai Bac	5.4	Live coral	108.2991999*	16.12715000*
Son Tra	Tay Bai Bac	3.5	Live coral	108.2990899*	16.12707000*
Son Tra	Tay Bai Bac	4.9	Live coral	108.2992799*	16.12683000*
Son Tra	Tay Bai Bac	6	Live coral	108.2993899*	16.12667000*
Son Tra	Tay Bai Bac	5.6	Live coral	108.2994499*	16.12649000*
Son Tra	Tay Bai Bac	4.5	Live coral	108.2995199*	16.12629000*
Son Tra	Tay Bai Bac	2.8	Live coral	108.2994699*	16.12623000*
Son Tra	Tay Bai Bac	4.5	Live coral	108.2995599*	16.12624000*
Son Tra	Tay Bai Bac	6.5	Live coral	108.2995799*	16.12629000*
Son Tra	Tay Bai Bac	4	Live coral	108.2995199*	16.12627000*
Son Tra	Tay Bai Bac	7.8	Live coral	108.2997099*	16.12618000*
Son Tra	Tay Bai Bac	4.4	Live coral	108.2996899*	16.12600000*
Son Tra	Tay Bai Bac	4.5	Live coral	108.2997899*	16.12583000*
Son Tra	Tay Bai Bac	4.5	Live coral	108.3000799*	16.12549000*
Son Tra	Tay Bai Bac	3.6	Live coral	108.3000799*	16.12546000*
Son Tra	Tay Bai Bac	3.5	Live coral	108.3001799*	16.12546000*
Son Tra	Tay Bai Bac	4.7	Live coral	108.3002499*	16.12552000*
Son Tra	Tay Bai Bac	4.3	Live coral	108.3001299*	16.12549000*
Son Tra	Tay Bai Bac	3.1	Live coral	108.3003499*	16.12536000*
Son Tra	Tay Bai Bac	4.2	Live coral	108.3004799*	16.12522000*
Son Tra	Tay Bai Bac	4.8	Live coral	108.3006999*	16.12531000*
Son Tra	Tay Bai Bac	5.2	Live coral	108.3009499*	16.12530000*
Son Tra	Tay Bai Bac	5.9	Live coral	108.3010799*	16.12543000*
Son Tra	Tay Bai Bac	5.6	Live coral	108.3013499*	16.12539000*
Son Tra	Tay Bai Bac	4.7	Live coral	108.3013099*	16.12534000*
Son Tra	Tay Bai Bac	4.5	Live coral	108.3013799*	16.12532000*
Son Tra	Tay Bai Bac	7	Live coral	108.3014099*	16.12542000*
Son Tra	Tay Bai Bac	5.9	Live coral	108.3013699*	16.12539000*
Son Tra	Tay Bai Bac	7.3	Live coral	108.3015499*	16.12537000*
Son Tra	Tay Bai Bac	5.5	Live coral	108.3015399*	16.12527000*
Son Tra	Tay Bai Bac	7	Live coral	108.3018899*	16.12533000*
Son Tra	Vung Cay Bang	2.9	Live coral	108.2761199*	16.13404000*
Son Tra	Vung Cay Bang	1.9	Live coral	108.2761999*	16.13399000*
Son Tra	Vung Cay Bang	1.6	Live coral	108.2763599*	16.13397000*
Son Tra	Vung Cay Bang	2	Live coral	108.2764699*	16.13412000*
Son Tra	Vung Cay Bang	2.1	Live coral	108.2764199*	16.13421000*
Son Tra	Vung Cay Bang	2.1	Live coral	108.2764699*	16.13429000*
Son Tra	Vung Cay Bang	1.7	Live coral	108.2765499*	16.13424000*
Son Tra	Vung Cay Bang	2.2	Live coral	108.2764899*	16.13423000*
Son Tra	Vung Cay Bang	2.6	Live coral	108.2764399*	16.13433000*
Son Tra	Vung Cay Bang	5.1	Live coral	108.2763699*	16.13441000*
Son Tra	Vung Cay Bang	6	Live coral	108.2762799*	16.13452000*
Son Tra	Vung Cay Bang	4.5	Live coral	108.2763399*	16.13461000*
Son Tra	Vung Cay Bang	5	Live coral	108.2763999*	16.13457000*
Son Tra	Vung Cay Bang	4.5	Live coral	108.2765099*	16.13454000*
Son Tra	Vung Cay Bang	2.9	Live coral	108.2766099*	16.13450000*
Son Tra	Vung Cay Bang	2	Live coral	108.2766599*	16.13444000*
Son Tra	Vung Cay Bang	2	Live coral	108.2767199*	16.13454000*
Son Tra	Vung Cay Bang	3	Live coral	108.2766599*	16.13457000*
Son Tra	Vung Cay Bang	2.1	Live coral	108.2766799*	16.13451000*
Son Tra	Vung Cay Bang	4.1	Live coral	108.2765699*	16.13467000*
Son Tra	Vung Cay Bang	4.8	Live coral	108.2764699*	16.13475000*
Son Tra	Vung Cay Bang	2.8	Live coral	108.2765699*	16.13485000*
Son Tra	Vung Cay Bang	3.4	Live coral	108.2766899*	16.13475000*
Son Tra	Vung Cay Bang	4.2	Live coral	108.2767199*	16.13487000*
Son Tra	Vung Cay Bang	3.5	Live coral	108.2767799*	16.13482000*
Son Tra	Vung Cay Bang	3.7	Live coral	108.2768399*	16.13490000*
Son Tra	Vung Cay Bang	4	Live coral	108.2767899*	16.13495000*
Son Tra	Vung Cay Bang	3	Live coral	108.2767999*	16.13489000*
Son Tra	Vung Cay Bang	1.8	Live coral	108.2768899*	16.13488000*
Son Tra	Vung Cay Bang	3.9	Live coral	108.2769199*	16.13517000*
Son Tra	Vung Cay Bang	2.9	Live coral	108.2769499*	16.13525000*
Son Tra	Vung Cay Bang	3	Live coral	108.2769199*	16.13523000*
Son Tra	Vung Cay Bang	4	Live coral	108.2742199*	16.13404000*
Son Tra	Tay Hon Sup	4	Live coral	108.2619199*	16.08998000*
Son Tra	Tay Hon Sup	3.5	Live coral	108.2618799*	16.08979000*
Son Tra	Tay Hon Sup	4	Live coral	108.2619899*	16.08977000*
Son Tra	Tay Hon Sup	3.6	Live coral	108.2620199*	16.08984000*
Son Tra	Tay Hon Sup	3.6	Live coral	108.2619599*	16.08982000*
Son Tra	Tay Hon Sup	3.1	Live coral	108.2618799*	16.08971000*
Son Tra	Tay Hon Sup	3.3	Live coral	108.2618699*	16.08960000*
Son Tra	Tay Hon Sup	2.8	Live coral	108.2618399*	16.08949000*
Son Tra	Tay Hon Sup	2.8	Live coral	108.2619199*	16.08950000*
Son Tra	Tay Hon Sup	3.4	Live coral	108.2619299*	16.08960000*
Son Tra	Tay Hon Sup	2.6	Live coral	108.2618899*	16.08954000*
Son Tra	Tay Hon Sup	2.5	Live coral	108.2618199*	16.08953000*
Son Tra	Tay Hon Sup	2.7	Live coral	108.2619499*	16.08946000*
Son Tra	Tay Hon Sup	2.4	Live coral	108.2619799*	16.08940000*
Son Tra	Tay Hon Sup	2.6	Live coral	108.2619799*	16.08934000*
Son Tra	Tay Hon Sup	3.5	Live coral	108.2620399*	16.08932000*
Son Tra	Tay Hon Sup	3.8	Live coral	108.2620599*	16.08940000*
Son Tra	Tay Hon Sup	3.5	Live coral	108.2620299*	16.08940000*
Son Tra	Tay Hon Sup	2.8	Live coral	108.2619399*	16.08928000*
Son Tra	Tay Hon Sup	1.5	Live coral	108.2618999*	16.08918000*
Son Tra	Tay Hon Sup	1.6	Live coral	108.2618899*	16.08910000*
Son Tra	Tay Hon Sup	1.4	Live coral	108.2619899*	16.08913000*
Son Tra	Tay Hon Sup	2.1	Live coral	108.2619799*	16.08922000*
Son Tra	Tay Hon Sup	2.2	Live coral	108.2619399*	16.08916000*
Son Tra	Tay Hon Sup	2.3	Live coral	108.2617499*	16.08934000*
Son Tra	Tay Hon Sup	2	Live coral	108.2617399*	16.08942000*
Son Tra	Tay Hon Sup	2.7	Live coral	108.2616199*	16.08945000*
Son Tra	Tay Hon Sup	2.6	Live coral	108.2615999*	16.08932000*
Son Tra	Tay Hon Sup	2	Live coral	108.2616599*	16.08935000*
Son Tra	Tay Hon Sup	2.5	Live coral	108.2616899*	16.08950000*
Son Tra	Tay Hon Sup	2.7	Live coral	108.2616699*	16.08961000*
Son Tra	Tay Hon Sup	3.1	Live coral	108.2616799*	16.08977000*
Son Tra	Tay Hon Sup	3.4	Live coral	108.2617299*	16.08976000*
Son Tra	Tay Hon Sup	4	Live coral	108.2617299*	16.08988000*
Son Tra	Tay Hon Sup	4.5	Live coral	108.2616599*	16.08987000*
Son Tra	Tay Hon Sup	3.7	Live coral	108.2616899*	16.08980000*
Son Tra	Tay Hon Sup	3.7	Live coral	108.2616699*	16.08992000*
Son Tra	Tay Hon Sup	3.8	Live coral	108.2616899*	16.09009000*
Son Tra	Tay Hon Sup	4.1	Live coral	108.2615699*	16.09010000*
Son Tra	Tay Hon Sup	6.3	Live coral	108.2616599*	16.09016000*
Son Tra	Tay Hon Sup	4.8	Live coral	108.2616199*	16.09012000*
Son Tra	Tay Hon Sup	7.3	Live coral	108.2616599*	16.09026000*
Son Tra	Tay Hon Sup	3.9	Live coral	108.2613399*	16.09000000*
Son Tra	Tay Hon Sup	3.3	Live coral	108.2612699*	16.09002000*
Son Tra	Tay Hon Sup	3.2	Live coral	108.2612699*	16.08994000*
Son Tra	Tay Hon Sup	3	Live coral	108.2613399*	16.08995000*
Son Tra	Tay Hon Sup	2.8	Live coral	108.2612899*	16.08999000*
Son Tra	Tay Hon Sup	3.2	Live coral	108.2612399*	16.08985000*
Son Tra	Tay Hon Sup	3.1	Live coral	108.2612399*	16.08977000*
Son Tra	Tay Hon Sup	2.7	Live coral	108.2612199*	16.08965000*
Son Tra	Tay Hon Sup	3.1	Live coral	108.2611899*	16.08957000*
Son Tra	Tay Hon Sup	2.7	Live coral	108.2612499*	16.08955000*
Son Tra	Tay Hon Sup	3.1	Live coral	108.2612799*	16.08965000*
Son Tra	Tay Hon Sup	3	Live coral	108.2612699*	16.08961000*
Son Tra	Tay Hon Sup	2.7	Live coral	108.2612399*	16.08946000*
Son Tra	Tay Hon Sup	2.8	Live coral	108.2612299*	16.08937000*
Son Tra	Tay Hon Sup	2.3	Live coral	108.2613299*	16.08929000*
Son Tra	Tay Hon Sup	2.9	Live coral	108.2612799*	16.08921000*
Son Tra	Tay Hon Sup	3.1	Live coral	108.2613599*	16.08926000*
Son Tra	Tay Hon Sup	2.7	Live coral	108.2613899*	16.08933000*
Son Tra	Tay Hon Sup	2.5	Live coral	108.2613399*	16.08925000*
Son Tra	Tay Hon Sup	2.1	Live coral	108.2613199*	16.08916000*
Son Tra	Tay Hon Sup	2.4	Live coral	108.2613899*	16.08898000*
Son Tra	Tay Hon Sup	2.6	Live coral	108.2613599*	16.08891000*
Son Tra	Tay Hon Sup	2.2	Live coral	108.2612899*	16.08877000*
Son Tra	Tay Hon Sup	2.8	Live coral	108.2613099*	16.08869000*
Son Tra	Tay Hon Sup	2.6	Live coral	108.2613699*	16.08868000*
Son Tra	Tay Hon Sup	2.4	Live coral	108.2613899*	16.08877000*
Son Tra	Tay Hon Sup	2.3	Live coral	108.2613599*	16.08876000*
Son Tra	Tay Hon Sup	2.2	Live coral	108.2613799*	16.08873000*
Son Tra	Tay Hon Sup	2	Live coral	108.2614999*	16.08873000*
Son Tra	Tay Hon Sup	2.3	Live coral	108.2615699*	16.08870000*
Son Tra	Tay Hon Sup	2.3	Live coral	108.2615999*	16.08878000*
Son Tra	Tay Hon Sup	2.3	Live coral	108.2614899*	16.08880000*
Son Tra	Tay Hon Sup	2	Live coral	108.2615099*	16.08876000*
Son Tra	Tay Hon Sup	2.3	Live coral	108.2616299*	16.08865000*
Son Tra	Tay Hon Sup	2.5	Live coral	108.2617199*	16.08866000*
Son Tra	Tay Hon Sup	2.4	Live coral	108.2617199*	16.08858000*
Son Tra	Tay Hon Sup	2.3	Live coral	108.2617699*	16.08859000*
Son Tra	Tay Hon Sup	2.3	Live coral	108.2617799*	16.08867000*
Son Tra	Tay Hon Sup	2.4	Live coral	108.2617399*	16.08862000*
Son Tra	Tay Hon Sup	2.3	Live coral	108.2617999*	16.08864000*
Son Tra	Tay Hon Sup	2.3	Live coral	108.2618799*	16.08860000*
Son Tra	Tay Hon Sup	2.1	Live coral	108.2619599*	16.08862000*
Son Tra	Tay Hon Sup	1.9	Live coral	108.2619599*	16.08871000*
Son Tra	Tay Hon Sup	2.1	Live coral	108.2618799*	16.08870000*
Son Tra	Tay Hon Sup	2	Live coral	108.2619299*	16.08864000*
Son Tra	Tay Hon Sup	3.4	Live coral	108.2610699*	16.08879000*
Son Tra	Tay Hon Sup	3.1	Live coral	108.2610899*	16.08893000*
Son Tra	Tay Hon Sup	3.4	Live coral	108.2610099*	16.08914000*
Son Tra	Tay Hon Sup	3.4	Live coral	108.2610199*	16.08931000*
Son Tra	Tay Hon Sup	3.3	Live coral	108.2609799*	16.08938000*
Son Tra	Tay Hon Sup	3.2	Live coral	108.2610899*	16.08937000*
Son Tra	Tay Hon Sup	3.3	Live coral	108.2610599*	16.08931000*
Son Tra	Tay Hon Sup	3	Live coral	108.2610499*	16.08934000*
Son Tra	Tay Hon Sup	3.6	Live coral	108.2609799*	16.08947000*
Son Tra	Tay Hon Sup	3.3	Live coral	108.2609999*	16.08962000*
Son Tra	Tay Hon Sup	3.2	Live coral	108.2609899*	16.08978000*
Son Tra	Tay Hon Sup	3.7	Live coral	108.2608999*	16.08981000*
Son Tra	Tay Hon Sup	3.5	Live coral	108.2608899*	16.08974000*
Son Tra	Tay Hon Sup	3.1	Live coral	108.2609899*	16.08972000*
Son Tra	Tay Hon Sup	3.3	Live coral	108.2609499*	16.08976000*
Son Tra	Tay Hon Sup	3.4	Live coral	108.2608899*	16.08990000*
Son Tra	Tay Hon Sup	4	Live coral	108.2608999*	16.09008000*
Son Tra	Tay Hon Sup	4.3	Live coral	108.2605699*	16.09009000*
Son Tra	Tay Hon Sup	3.7	Live coral	108.2605099*	16.08997000*
Son Tra	Tay Hon Sup	2.9	Live coral	108.2604399*	16.08978000*
Son Tra	Tay Hon Sup	3.4	Live coral	108.2603899*	16.08960000*
Son Tra	Tay Hon Sup	3.3	Live coral	108.2603499*	16.08953000*
Son Tra	Tay Hon Sup	3.4	Live coral	108.2603699*	16.08946000*
Son Tra	Tay Hon Sup	3.1	Live coral	108.2604499*	16.08948000*
Son Tra	Tay Hon Sup	3.3	Live coral	108.2604399*	16.08956000*
Son Tra	Tay Hon Sup	3.2	Live coral	108.2604099*	16.08948000*
Son Tra	Tay Hon Sup	3	Live coral	108.2602999*	16.08933000*
Son Tra	Tay Hon Sup	3	Live coral	108.2606499*	16.08907000*
Son Tra	Tay Hon Sup	3.5	Live coral	108.2606399*	16.08895000*
Son Tra	Tay Hon Sup	5	Live coral	108.2606499*	16.08888000*
Son Tra	Tay Hon Sup	4.7	Live coral	108.2605499*	16.08899000*
Son Tra	Tay Hon Sup	4.2	Live coral	108.2605899*	16.08894000*
Son Tra	Tay Hon Sup	7.4	Live coral	108.2607999*	16.08868000*
Son Tra	Tay Hon Sup	2.5	Live coral	108.2621199*	16.08863000*
Son Tra	Tay Hon Sup	2.9	Live coral	108.2620699*	16.08857000*
Son Tra	Tay Hon Sup	3.1	Live coral	108.2620199*	16.08860000*
Son Tra	Tay Hon Sup	2.7	Live coral	108.2620699*	16.08861000*
Son Tra	Tay Hon Sup	2.9	Live coral	108.2619899*	16.08846000*
Son Tra	Tay Hon Sup	3.5	Live coral	108.2620799*	16.08841000*
Son Tra	Tay Hon Sup	3.4	Live coral	108.2619899*	16.08836000*
Son Tra	Tay Hon Sup	4.8	Live coral	108.2619699*	16.08828000*
Son Tra	Tay Hon Sup	4.3	Live coral	108.2620599*	16.08828000*
Son Tra	Tay Hon Sup	3.2	Live coral	108.2621099*	16.08836000*
Son Tra	Tay Hon Sup	3.7	Live coral	108.2620599*	16.08832000*
Son Tra	Tay Hon Sup	3.5	Live coral	108.2617399*	16.08839000*
Son Tra	Tay Hon Sup	3	Live coral	108.2615699*	16.08840000*
Son Tra	Tay Hon Sup	3.3	Live coral	108.2615099*	16.08841000*
Son Tra	Tay Hon Sup	3.7	Live coral	108.2615099*	16.08835000*
Son Tra	Tay Hon Sup	3.5	Live coral	108.2615699*	16.08834000*
Son Tra	Tay Hon Sup	3.8	Live coral	108.2615399*	16.08837000*
Son Tra	Tay Hon Sup	4.9	Live coral	108.2613099*	16.08841000*
Son Tra	Tay Hon Sup	4.9	Live coral	108.2611799*	16.08832000*
Son Tra	Tay Hon Sup	5.7	Live coral	108.2611199*	16.08834000*
Son Tra	Tay Hon Sup	5	Live coral	108.2615099*	16.08823000*
Son Tra	Tay Hon Sup	4.6	Live coral	108.2615399*	16.08824000*
Son Tra	Tay Hon Sup	4.4	Live coral	108.2615999*	16.08824000*
Son Tra	Tay Hon Sup	4	Live coral	108.2615999*	16.08820000*
Son Tra	Tay Hon Sup	5.2	Live coral	108.2615299*	16.08820000*
Son Tra	Dong Hon Sup	4.7	Live coral	108.2623899*	16.08829000*
Son Tra	Dong Hon Sup	5.2	Live coral	108.2623599*	16.08817000*
Son Tra	Dong Hon Sup	5.2	Live coral	108.2623599*	16.08815000*
Son Tra	Dong Hon Sup	4.8	Live coral	108.2623899*	16.08821000*
Son Tra	Dong Hon Sup	5.9	Live coral	108.2624399*	16.08820000*
Son Tra	Dong Hon Sup	5.6	Live coral	108.2624399*	16.08814000*
Son Tra	Dong Hon Sup	5.2	Live coral	108.2623799*	16.08819000*
Son Tra	Dong Hon Sup	5.4	Live coral	108.2624899*	16.08812000*
Son Tra	Dong Hon Sup	7	Live coral	108.2625899*	16.08816000*
Son Tra	Dong Hon Sup	4.8	Live coral	108.2625399*	16.08833000*
Son Tra	Dong Hon Sup	3.1	Live coral	108.2626499*	16.08831000*
Son Tra	Dong Hon Sup	3.8	Live coral	108.2626399*	16.08840000*
Son Tra	Dong Hon Sup	4	Live coral	108.2625499*	16.08841000*
Son Tra	Dong Hon Sup	4.8	Live coral	108.2625899*	16.08835000*
Son Tra	Dong Hon Sup	3.5	Live coral	108.2625499*	16.08843000*
Son Tra	Dong Hon Sup	3.7	Live coral	108.2625999*	16.08849000*
Son Tra	Dong Hon Sup	4.3	Live coral	108.2626899*	16.08838000*
Son Tra	Dong Hon Sup	5	Live coral	108.2626199*	16.08816000*
Son Tra	Dong Hon Sup	5.5	Live coral	108.2624299*	16.08809000*
Son Tra	Bai But 1	3.1	Live coral	108.2730699*	16.09725000*
Son Tra	Bai But 1	2.4	Live coral	108.2730399*	16.09738000*
Son Tra	Bai But 1	2.2	Live coral	108.2729899*	16.09747000*
Son Tra	Bai But 1	2.2	Live coral	108.2729299*	16.09750000*
Son Tra	Bai But 1	2.1	Live coral	108.2729499*	16.09754000*
Son Tra	Bai But 1	2.1	Live coral	108.2729899*	16.09754000*
Son Tra	Bai But 1	2.1	Live coral	108.2729599*	16.09749000*
Son Tra	Bai But 1	2	Live coral	108.2730099*	16.09764000*
Son Tra	Bai But 1	1.7	Live coral	108.2729999*	16.09777000*
Son Tra	Bai But 1	1.4	Live coral	108.2730099*	16.09785000*
Son Tra	Bai But 1	1.5	Live coral	108.2729299*	16.09788000*
Son Tra	Bai But 1	1.5	Live coral	108.2729399*	16.09792000*
Son Tra	Bai But 1	1.4	Live coral	108.2730299*	16.09791000*
Son Tra	Bai But 1	1.5	Live coral	108.2729799*	16.09787000*
Son Tra	Bai But 1	1.6	Live coral	108.2731599*	16.09781000*
Son Tra	Bai But 1	1.9	Live coral	108.2731399*	16.09770000*
Son Tra	Bai But 1	2.3	Live coral	108.2731899*	16.09763000*
Son Tra	Bai But 1	2.2	Live coral	108.2731899*	16.09758000*
Son Tra	Bai But 1	2.4	Live coral	108.2732299*	16.09737000*
Son Tra	Bai But 1	2.7	Live coral	108.2732599*	16.09726000*
Son Tra	Bai But 1	2.3	Live coral	108.2733799*	16.09697000*
Son Tra	Bai But 1	3.5	Live coral	108.2734499*	16.09688000*
Son Tra	Bai But 1	4.4	Live coral	108.2735499*	16.09669000*
Son Tra	Bai But 1	4	Live coral	108.2735099*	16.09673000*
Son Tra	Bai But 1	4.3	Live coral	108.2734399*	16.09661000*
Son Tra	Bai But 1	5.3	Live coral	108.2735299*	16.09649000*
Son Tra	Bai But 1	4.5	Live coral	108.2735799*	16.09643000*
Son Tra	Bai But 1	4.4	Live coral	108.2737399*	16.09643000*
Son Tra	Bai But 1	4	Live coral	108.2737399*	16.09652000*
Son Tra	Bai But 1	3.7	Live coral	108.2737999*	16.09651000*
Son Tra	Bai But 1	4.3	Live coral	108.2737999*	16.09644000*
Son Tra	Bai But 1	3.6	Live coral	108.2737699*	16.09648000*
Son Tra	Bai But 1	3.2	Live coral	108.2736099*	16.09688000*
Son Tra	Bai But 1	3	Live coral	108.2735099*	16.09699000*
Son Tra	Bai But 1	2.7	Live coral	108.2735199*	16.09707000*
Son Tra	Bai But 1	3.1	Live coral	108.2735599*	16.09711000*
Son Tra	Bai But 1	3.5	Live coral	108.2735599*	16.09704000*
Son Tra	Bai But 1	3	Live coral	108.2734999*	16.09703000*
Son Tra	Bai But 1	2.6	Live coral	108.2734299*	16.09720000*
Son Tra	Bai But 1	1.9	Live coral	108.2734099*	16.09726000*
Son Tra	Bai But 1	2.3	Live coral	108.2734799*	16.09726000*
Son Tra	Bai But 1	2.4	Live coral	108.2734799*	16.09734000*
Son Tra	Bai But 1	2.3	Live coral	108.2733699*	16.09734000*
Son Tra	Bai But 1	2.2	Live coral	108.2734499*	16.09731000*
Son Tra	Mui Gion	4.3	Live coral	108.2686499*	16.09493000*
Son Tra	Mui Gion	3.5	Live coral	108.2686399*	16.09502000*
Son Tra	Mui Gion	2.9	Live coral	108.2686199*	16.09506000*
Son Tra	Mui Gion	2.8	Live coral	108.2686199*	16.09512000*
Son Tra	Mui Gion	2.5	Live coral	108.2685499*	16.09512000*
Son Tra	Mui Gion	2.8	Live coral	108.2685399*	16.09506000*
Son Tra	Mui Gion	2.5	Live coral	108.2685799*	16.09507000*
Son Tra	Mui Gion	2.5	Live coral	108.2684399*	16.09506000*
Son Tra	Mui Gion	2	Live coral	108.2684199*	16.09511000*
Son Tra	Mui Gion	3	Live coral	108.2683099*	16.09506000*
Son Tra	Mui Gion	2.3	Live coral	108.2683099*	16.09513000*
Son Tra	Mui Gion	3.1	Live coral	108.2682199*	16.09509000*
Son Tra	Mui Gion	3.5	Live coral	108.2682599*	16.09505000*
Son Tra	Mui Gion	2.5	Live coral	108.2682999*	16.09508000*
Son Tra	Mui Gion	4.5	Live coral	108.2683199*	16.09496000*
Son Tra	Mui Gion	4.7	Live coral	108.2685099*	16.09492000*
