# Supplementary material for: Characterizing the spatial distribution of coral reefs in the South-Central Coast region of Viet Nam using Planetscope imagery
Source: PeerJ. 2021 Nov 2;9:e12413. doi: 10.7717/peerj.12413 (PMC8570177; doi:10.7717/peerj.12413)
Supplement: Supplemental Information 3 [file peerj-09-12413-s003.xls]

## Sheet: CLC field data
Area	Site	Image	Ngay1	Bottom	Depth_insi	X	Y
CLC	Hon Tai	Camera 360	18/9/2019	HB		108.541	15.9032
CLC	Hon Tai	Camera 360	18/9/2019	HB		108.541	15.9032
CLC			18/9/2019	D		108.54	15.9019
CLC	Hon Tai	Camera 360	19/9/2019	HB		108.54	15.9117
CLC	Hon Tai	Camera 360	18/9/2019	HB		108.541	15.9032
CLC			18/9/2019	D		108.541	15.902
CLC	Hon Tai	Camera 360	18/9/2019	HB		108.541	15.9033
CLC	Hon Tai	Camera 360	18/9/2019	HB		108.541	15.9032
CLC			18/9/2019	D		108.541	15.9021
CLC	Hon Tai	Camera 360	18/9/2019	S		108.541	15.9033
CLC	Hon Tai	Camera 360	18/9/2019	S		108.541	15.9061
CLC	Hon Tai	HT_01_G_G1.JPG	18/9/2019	3LC		108.54	15.9033
CLC	Hon Tai	HT_01_G_G5.JPG	18/9/2019	3LC	5	108.54	15.9033
CLC	Bai Bac	BB_26_P3_G5.JPG	15/9/2019	2LC	0.9	108.491	15.958
CLC	Hon Tai	HT_01_P1_G2.JPG	18/9/2019	3LC		108.54	15.9033
CLC	Hon Tai	HT_01_P1_G4.JPG	18/9/2019	3LC		108.54	15.9032
CLC	Bai Bac	BB_O2_1_2_G5.JPG	14/9/2019	2LC	1	108.488	15.9624
CLC	Hon Tai	HT_01_P2_G1.JPG	18/9/2019	3LC		108.54	15.9033
CLC	Hon Tai	HT_01_P2_G2.JPG	18/9/2019	3LC		108.54	15.9033
CLC	Hon Tai	HT_01_P2_G4.JPG	18/9/2019	3LC		108.54	15.9033
CLC	Hon Tai	HT_01_P2_G5.JPG	18/9/2019	3LC		108.54	15.9033
CLC	Hon Tai	HT_01_P3_G1.JPG	18/9/2019	3LC		108.54	15.9033
CLC	Hon Tai	HT_01_P3_G5.JPG	18/9/2019	S		108.54	15.9033
CLC	Hon Tai	HT_01_P4_G1.JPG	18/9/2019	3LC		108.54	15.9033
CLC	Hon Tai	HT_01_P4_G2.JPG	18/9/2019	3LC		108.54	15.9033
CLC	Hon Tai	HT_01_P4_G3.JPG	18/9/2019	3LC		108.54	15.9033
CLC	Hon Tai	HT_01_P4_G4.JPG	18/9/2019	3LC		108.54	15.9033
CLC	Hon Tai	HT_01_P4_G5.JPG	18/9/2019	3LC		108.54	15.9033
CLC	Hon Tai	HT_10_P1_G2.JPG	18/9/2019	3LC		108.533	15.908
CLC	Bai Bac	BB_17_P3_G5.JPG	15/9/2019	1LC	0.6	108.49	15.9609
CLC	Bai Bac	BB_15_P4_G5.JPG	15/9/2019	HB	3.2	108.489	15.9606
CLC	Bai Huong	BH_08_P4_G5.JPG	20/9/2019	1LC	0.8	108.529	15.9301
CLC	Bai Huong	BH_08_P5_G5.JPG	20/9/2019	1LC	0.8	108.529	15.9301
CLC	Bai Huong	BH_08_P3_G5.JPG	20/9/2019	1LC	0.8	108.529	15.9301
CLC	Bai Huong	BH_08_P2_G5.JPG	20/9/2019	1LC	0.8	108.529	15.9301
CLC	Bai Bac	BB_N15_DR_03.JPG	15/9/2019	1LC	0.8	108.49	15.9599
CLC	Bai Bac	BB_N15_DR_12.JPG	15/9/2019	1LC	0.8	108.49	15.9599
CLC	Bai Bac	BB_17_G_G5.JPG	15/9/2019	1LC	0.8	108.49	15.9609
CLC	Bai Bac	BB_17_P2_G5.JPG	15/9/2019	1LC	0.8	108.49	15.9609
CLC	Bai Chong-Bai Bim	BBi_O2_P3_G5.JPG	21/9/2019	1LC	0.9	108.516	15.9386
CLC	Bai Bac	BB_17_P4_G5.JPG	15/9/2019	1LC	0.9	108.49	15.9608
CLC	Bai Chong-Bai Bim	BBi_O3_P2_G4.JPG	21/9/2019	1LC	1	108.517	15.9387
CLC	Bai Bac	BB_O2_1_1_G5.JPG	14/9/2019	1LC	1.1	108.488	15.9627
CLC	Bai Bac	BB_O10_P2_G5.JPG	15/9/2019	1LC	1.2	108.489	15.9623
CLC	Bai Bac	BB_O25_G_G5.JPG	15/9/2019	1LC	1.3	108.491	15.959
CLC	Bai Bac	BB_N15_DR_10.JPG	15/9/2019	1LC	1.3	108.49	15.9596
CLC	Bai Bac	BB_N15_DR_11.JPG	15/9/2019	1LC	1.3	108.49	15.9599
CLC	Bai Bac	BB_19_G_G1.JPG	15/9/2019	HB		108.49	15.96
CLC	Bai Bac	BB_12_P2_G5.JPG	15/9/2019	1LC	1.5	108.489	15.962
CLC	Bai Bac	BB_26_P4_G5.JPG	15/9/2019	1LC	1.6	108.491	15.9581
CLC	Bai Bac	BB_12_P3_G5.JPG	15/9/2019	1LC	1.6	108.489	15.9619
CLC	Bai Huong	BH_O1_G_G5.JPG	20/9/2019	1LC	1.7	108.53	15.927
CLC	Bai Huong	BH_DR_9_G5.JPG	20/9/2019	1LC	1.7	108.53	15.9273
CLC	Hon Tai	HT_12_P1_G5.JPG	18/9/2019	3LC		108.534	15.9083
CLC	Hon Tai	HT_12_P2_G1.JPG	18/9/2019	3LC		108.534	15.9082
CLC	Hon Tai	HT_12_P2_G2.JPG	18/9/2019	3LC		108.534	15.9083
CLC	Hon Tai	HT_12_P2_G3.JPG	18/9/2019	3LC		108.534	15.9083
CLC	Hon Tai	HT_12_P2_G5.JPG	18/9/2019	3LC		108.534	15.9082
CLC	Hon Tai	HT_12_P3_G5.JPG	18/9/2019	3LC	2.5	108.534	15.9083
CLC	Bai Lang -Bai Xep	BX_O7_G_G5.JPG	22/9/2019	1LC	1.7	108.508	15.9469
CLC	Bai Bac	BB_18_G_G5.JPG	15/9/2019	1LC	1.7	108.49	15.9603
CLC	Bai Bac	BB_O12_P4_G5.JPG	15/9/2019	1LC	1.7	108.489	15.9619
CLC	Hon Tai	HT_12_P5_G4.JPG	18/9/2019	3LC	3	108.534	15.9083
CLC	Bai Bac	BB_O3_1_6_G5.JPG	14/9/2019	1LC	1.7	108.488	15.9623
CLC	Hon Tai	HT_13_P1_G5.JPG	18/9/2019	3LC	2	108.534	15.9083
CLC	Hon Tai	HT_13_P2_G5.JPG	18/9/2019	3LC	2.2	108.534	15.9084
CLC	Hon Tai	HT_13_P3_G5.JPG	18/9/2019	3LC	2.4	108.534	15.9085
CLC	Hon Tai	HT_13_P4_G5.JPG	18/9/2019	3LC	2.3	108.534	15.9084
CLC	Hon Tai	HT_13_P5_G5.JPG	18/9/2019	3LC	1.8	108.534	15.9084
CLC	Hon Tai	HT_11_P5_G5.JPG	18/9/2019	1LC	1.8	108.534	15.9081
CLC	Hon Tai	HT_14_P2_G2.JPG	18/9/2019	HB		108.534	15.9087
CLC	Hon Tai	HT_14_P2_G5.JPG	18/9/2019	HB	3.4	108.534	15.9087
CLC	Hon Tai	HT_14_P3_G5.JPG	18/9/2019	3LC	2.5	108.534	15.9088
CLC	Bai Lang -Bai Xep	BX_O7_P4_G5.JPG	22/9/2019	1LC	1.8	108.508	15.9469
CLC	Bai Bac	BB_O10_P1_G5.JPG	15/9/2019	1LC	1.8	108.489	15.9622
CLC	Bai Bac	BB_O1_1_1_G5.JPG	14/9/2019	1LC	1.8	108.488	15.9627
CLC	Bai Bac	BB_O1_2_2_G5.JPG	14/9/2019	1LC	1.8	108.488	15.9627
CLC	Bai Ban	BN_DR_2_G5.JPG	19/9/2019	1LC	1.9	108.534	15.9237
CLC	Bai Huong	BH_DR_17_G5.JPG	20/9/2019	1LC	1.9	108.53	15.9284
CLC	Bai Huong	BH_O7_P1_G5.JPG	20/9/2019	1LC	1.9	108.529	15.9295
CLC	Hon Tai	HT_DR_37_G5.JPG	18/9/2019	1LC	2	108.534	15.9082
CLC	Bai Bac	BB_24_G_G5.JPG	15/9/2019	1LC	2	108.491	15.9592
CLC	Bai Bac	BB_12_P5_G5.JPG	15/9/2019	1LC	2	108.489	15.9619
CLC	Hon Tai	HT_15_P2_G2.JPG	18/9/2019	3LC	3.2	108.534	15.9089
CLC	Bai Bac	BB_19_G_G5.JPG	15/9/2019	HB		108.49	15.96
CLC	Hon Tai	HT_15_P2_G2.JPG	18/9/2019	S	3.2	108.534	15.909
CLC	Hon Tai	HT_15_P2_G2.JPG	18/9/2019	HB	3.2	108.534	15.9089
CLC	Hon Tai	HT_15_P2_G2.JPG	18/9/2019	HB	3.2	108.534	15.9089
CLC	Hon Tai	HT_15_P3_G2.JPG	18/9/2019	HB	4.2	108.534	15.909
CLC	Bai Huong	BH_DR_7_G5.JPG	20/9/2019	1LC	2.1	108.53	15.9271
CLC	Hon Mo	HM_O3_P2_G5.JPG	16/9/2019	1LC	2.1	108.476	15.9331
CLC	Bai Bac	BB_O10_P4_G5.JPG	15/9/2019	1LC	2.1	108.489	15.9622
CLC	Bai Bac	BB_O3_2_3_G2.JPG	14/9/2019	1LC	2.1	108.488	15.9623
CLC	Bai Bac	BB_O7_1_2_G5.JPG	14/9/2019	2LC	1.7	108.486	15.9621
CLC	Hon Tai	HT_DR_1_G4.JPG	18/9/2019	HB		108.54	15.9032
CLC	Bai Bac	BB_19_P4_G1.JPG	15/9/2019	HB		108.49	15.9599
CLC	Bai Chong-Bai Bim	BBi_O4_P4_G3.JPG	21/9/2019	2LC	1.8	108.516	15.9384
CLC	Bai Bac	BB_19_P4_G2.JPG	15/9/2019	HB		108.49	15.96
CLC	Bai Bac	BB_19_P4_G4.JPG	15/9/2019	HB		108.49	15.9599
CLC	Bai Bac	BB_23_P3_G5.JPG	15/9/2019	HB	7.3	108.49	15.959
CLC	Bai Bac	BB_27_P3_G2.JPG	15/9/2019	HB	6.8	108.491	15.9576
CLC	Bai Bac	BB_N19_DR_118_G5.JPG	15/9/2019	HB		108.491	15.9577
CLC	Bai Bac	BB_N19_DR_129_G2.JPG	15/9/2019	HB		108.492	15.9572
CLC	Bai Bac	BB_14_P2_G2.JPG	15/9/2019	2LC	2	108.489	15.9613
CLC	Bai Bac	BB_N19_DR_32_G5.JPG	14/9/2019	HB	3.6	108.486	15.9628
CLC	Bai Bac	BB_N13_DR_3_G2.JPG	14/9/2019	2LC	2	108.485	15.9639
CLC	Bai Lang -Bai Xep	BX_O7_P1_G5.JPG	22/9/2019	2LC	2.1	108.508	15.947
CLC	Bai Ong	BO_O1_P3_G2.JPG	15/9/2019	2LC	2.2	108.495	15.9558
CLC	Bai Ong	BO_11_P2_G2.JPG	15/9/2019	2LC	2.2	108.496	15.9566
CLC	Bai Ban	BN_O5_P2_G2.JPG	19/9/2019	2LC	2.3	108.532	15.9252
CLC	Hon Tai	HT_DR_12_G1.JPG	18/9/2019	3LC		108.539	15.9032
CLC	Hon Tai	HT_DR_12_G2.JPG	18/9/2019	3LC		108.539	15.9033
CLC	Hon Tai	HT_DR_12_G3.JPG	18/9/2019	3LC		108.539	15.9033
CLC	Bai Huong	BH_O2_P2_G5.JPG	20/9/2019	2LC	2.3	108.53	15.9269
CLC	Hon Tai	HT_DR_12_G5.JPG	18/9/2019	3LC	5.5	108.539	15.9032
CLC	Hon Tai	HT_DR_13_G1.JPG	18/9/2019	4LC		108.539	15.9033
CLC	Hon Tai	HT_DR_13_G2.JPG	18/9/2019	4LC		108.539	15.9033
CLC	Hon Tai	HT_DR_13_G3.JPG	18/9/2019	4LC		108.539	15.9033
CLC	Hon Tai	HT_DR_13_G4.JPG	18/9/2019	4LC		108.539	15.9033
CLC	Hon Tai	HT_DR_13_G5.JPG	18/9/2019	4LC	4.7	108.539	15.9033
CLC	Hon Tai	HT_DR_14_G1.JPG	18/9/2019	HB	8.8	108.539	15.9032
CLC	Hon Tai	HT_DR_14_G2.JPG	18/9/2019	HB		108.539	15.9032
CLC	Hon Tai	HT_DR_14_G3.JPG	18/9/2019	HB		108.539	15.9032
CLC	Hon Tai	HT_DR_14_G5.JPG	18/9/2019	HB		108.539	15.9032
CLC	Hon Tai	HT_DR_14_G5.JPG	18/9/2019	HB		108.539	15.9032
CLC	Bai Ban	BN_DR_9_G5.JPG	19/9/2019	1LC	2.2	108.533	15.9244
CLC	Hon Tai	HT_DR_15_G1.JPG	18/9/2019	3LC	9.7	108.539	15.9031
CLC	Hon Tai	HT_DR_15_G4.JPG	18/9/2019	HB		108.539	15.903
CLC	Hon Tai	HT_DR_15_G5.JPG	18/9/2019	3LC		108.539	15.9031
CLC	Bai Huong	BH_O6_P2_G5.JPG	20/9/2019	2LC	2.3	108.53	15.9289
CLC	Bai Ong	BO_11_G_G5.JPG	15/9/2019	2LC	2.3	108.496	15.9565
CLC	Bai Ban	BN_O1_P1_G3.JPG	19/9/2019	2LC	2.4	108.534	15.9235
CLC	Bai Huong	BH_O2_P4_G5.JPG	20/9/2019	2LC	2.4	108.53	15.927
CLC	Bai Ban	BN_O1_P1_G5.JPG	19/9/2019	2LC	2.5	108.534	15.9236
CLC	Bai Chong-Bai Bim	BBi_DR_7_G5.JPG	21/9/2019	2LC	2.5	108.516	15.9384
CLC	Bai Chong-Bai Bim	BBi_O4_P4_G5.JPG	21/9/2019	2LC	2.5	108.516	15.9385
CLC	Bai Bac	BB_O5_2_6_G5.JPG	14/9/2019	2LC	2.5	108.485	15.9633
CLC	Bai Bac	BB_O4_1_5_G2.JPG	14/9/2019	2LC	2.5	108.484	15.9642
CLC	Bai Ban	BN_O1_P4_G5.JPG	19/9/2019	2LC	2.6	108.534	15.9236
CLC	Hon Tai	HT_DR_17_G5.JPG	18/9/2019	S	6.2	108.532	15.9042
CLC	Bai Huong	BH_O3_G_G2.JPG	20/9/2019	2LC	2.6	108.53	15.9277
CLC	Bai Huong	BH_O5_P4_G5.JPG	20/9/2019	2LC	2.6	108.53	15.9284
CLC	Bai Huong	BH_O5_P2_G5.JPG	20/9/2019	2LC	2.6	108.53	15.9285
CLC	Bai Lang -Bai Xep	BX_O3_P2_G2.JPG	22/9/2019	2LC	2.6	108.508	15.9515
CLC	Bai Ong	BO_O1_G_G2.JPG	15/9/2019	2LC	2.6	108.495	15.9558
CLC	Hon Tai	HT_DR_19_G1.JPG	18/9/2019	4LC		108.532	15.9057
CLC	Hon Tai	HT_DR_19_G2.JPG	18/9/2019	4LC		108.532	15.9057
CLC	Hon Tai	HT_DR_19_G3.JPG	18/9/2019	4LC		108.532	15.9057
CLC	Hon Tai	HT_DR_19_G4.JPG	18/9/2019	4LC		108.532	15.9057
CLC	Hon Tai	HT_DR_19_G5.JPG	18/9/2019	4LC	7.5	108.532	15.9057
CLC	Bai Chong-Bai Bim	BC_01_P2_G5.JPG	22/9/2019	2LC	2.7	108.509	15.9437
CLC	Bai Lang -Bai Xep	BX_O1_G_G5.JPG	22/9/2019	2LC	2.7	108.507	15.9532
CLC	Hon Tai	HT_DR_2_G3.JPG	18/9/2019	3LC		108.54	15.9032
CLC	Bai Bac	BB_12_P1_G5.JPG	15/9/2019	2LC	2.7	108.489	15.962
CLC	Bai Bac	BB_O7_1_9_G2.JPG	14/9/2019	2LC	2.7	108.486	15.9621
CLC	Hon Tai	HT_DR_20_G5.JPG	18/9/2019	4LC	1.7	108.532	15.9057
CLC	Hon Tai	HT_DR_21_G5.JPG	18/9/2019	4LC		108.532	15.9059
CLC	Bai Huong	BH_DR_25_G5.JPG	20/9/2019	1LC	2.2	108.529	15.9294
CLC	Hon Mo	HM_O3_G_G2.JPG	16/9/2019	1LC	2.2	108.476	15.9332
CLC	SunGroup	SG_01_P4_G5.JPG	21/9/2019	1LC	2.2	108.523	15.9333
CLC	Bai Bac	BB_O3_2_4_G5.JPG	14/9/2019	1LC	2.2	108.488	15.9622
CLC	Bai Huong	BH_O1_P1_G5.JPG	20/9/2019	1LC	2.3	108.53	15.9269
CLC	Bai Huong	BH_O7_P2_G5.JPG	20/9/2019	1LC	2.3	108.529	15.9295
CLC	Bai Huong	BH_O7_P3_G4.JPG	20/9/2019	1LC	2.3	108.529	15.9295
CLC	Hon Tai	HT_DR_24_G5.JPG	18/9/2019	3LC		108.532	15.9062
CLC	Hon Tai	HT_DR_25_G5.JPG	18/9/2019	HB	2.2	108.532	15.9063
CLC	Bai Chong-Bai Bim	BBi_DR_8_G5.JPG	21/9/2019	1LC	2.3	108.515	15.9384
CLC	Hon Kho	HKM_O1_1_1_G5.JPG	12/9/2019	2LC	2.7	108.422	15.9721
CLC	Hon Tai	HT_DR_28_G5.JPG	18/9/2019	3LC		108.532	15.9062
CLC	Hon Tai	HT_DR_29_G5.JPG	18/9/2019	3LC		108.532	15.9065
CLC	Hon Tai	HT_DR_3_G1.JPG	18/9/2019	3LC		108.54	15.9034
CLC	Hon Tai	HT_DR_3_G2.JPG	18/9/2019	3LC		108.54	15.9034
CLC	Hon Tai	HT_DR_3_G3.JPG	18/9/2019	3LC		108.54	15.9034
CLC	Hon Kho	HKM_O1_1_1_G5.JPG	12/9/2019	2LC	2.7	108.422	15.9721
CLC	Bai Chong-Bai Bim	BBi_DR_18_G3.JPG	21/9/2019	1LC	2.3	108.516	15.9386
CLC	Bai Chong-Bai Bim	BC_01_P4_G5.JPG	22/9/2019	1LC	2.3	108.509	15.9437
CLC	Bai Chong-Bai Bim	BC_01_P1_G5.JPG	22/9/2019	1LC	2.3	108.509	15.9438
CLC	Bai Bac	BB_26_P1_G5.JPG	15/9/2019	1LC	2.3	108.491	15.9582
CLC	Hon Tai	HT_DR_32_G4.JPG	18/9/2019	3LC		108.533	15.9081
CLC	Bai Bac	BB_24_P3_G5.JPG	15/9/2019	1LC	2.3	108.491	15.9591
CLC	Hon Tai	HT_11_P1_G5.JPG	18/9/2019	1LC	2.4	108.533	15.908
CLC	Hon Tai	HT_11_P2_G5.JPG	18/9/2019	1LC	2.4	108.534	15.908
CLC	Bai Huong	BH_O3_P4_G4.JPG	20/9/2019	2LC	2.8	108.53	15.9277
CLC	Hon Tai	HT_11_P4_G5.JPG	18/9/2019	1LC	2.4	108.534	15.908
CLC	Bai Chong-Bai Bim	BBi_O1_P2_G5.JPG	21/9/2019	1LC	2.4	108.515	15.9383
CLC	Hon Tai	HT_DR_36_G1.JPG	18/9/2019	3LC		108.533	15.9084
CLC	Bai Chong-Bai Bim	BBi_O1_P2_G5.JPG	21/9/2019	1LC	2.4	108.515	15.9383
CLC	Hon Tai	HT_DR_38_G5.JPG	18/9/2019	3LC	1.6	108.534	15.9083
CLC	Bai Lang -Bai Xep	BX_O4_P1_G2.JPG	22/9/2019	1LC	2.4	108.508	15.9494
CLC	Hon Tai	HT_DR_4_G1.JPG	18/9/2019	3LC		108.54	15.9034
CLC	Hon Tai	HT_DR_4_G2.JPG	18/9/2019	3LC		108.54	15.9034
CLC	Hon Tai	HT_DR_4_G3.JPG	18/9/2019	3LC		108.54	15.9034
CLC	Hon Tai	HT_DR_4_G4.JPG	18/9/2019	3LC		108.54	15.9034
CLC	Bai Huong	BH_O6_P4_G5.JPG	20/9/2019	2LC	2.8	108.53	15.9289
CLC	Bai Chong-Bai Bim	BBi_DR_22_G4.JPG	21/9/2019	2LC	2.8	108.516	15.9384
CLC	Bai Huong	BH_O1_P4_G5.JPG	20/9/2019	1LC	2.5	108.53	15.9269
CLC	Hon Tai	HT_DR_40_G5.JPG	18/9/2019	3LC	7.3	108.534	15.9085
CLC	Hon Tai	HT_DR_40_G5.JPG	18/9/2019	HB	7.3	108.534	15.9085
CLC	Bai Lang -Bai Xep	BX_O7_P2_G5.JPG	22/9/2019	2LC	2.8	108.508	15.947
CLC	Hon Tai	HT_DR_41_G4.JPG	18/9/2019	3LC		108.533	15.9086
CLC	Hon Tai	HT_DR_41_G5.JPG	18/9/2019	3LC	9.8	108.534	15.9086
CLC	Bai Lang -Bai Xep	BX_O7_P3_G5.JPG	22/9/2019	1LC	2.5	108.508	15.9469
CLC	Hon Tai	HT_DR_43_G1.JPG	18/9/2019	3LC		108.534	15.9088
CLC	Hon Tai	HT_DR_43_G2.JPG	18/9/2019	3LC		108.534	15.9088
CLC	Hon Tai	HT_DR_43_G4.JPG	18/9/2019	3LC		108.534	15.9088
CLC	Hon Tai	HT_DR_43_G5.JPG	18/9/2019	3LC	9.2	108.534	15.9088
CLC	Hon Tai	HT_DR_43_G5.JPG	18/9/2019	3LC	9.2	108.534	15.9088
CLC	Hon Tai	HT_DR_44_G5.JPG	18/9/2019	HB	7.2	108.534	15.9089
CLC	Hon Tai	HT_DR_45_G3.JPG	18/9/2019	3LC		108.534	15.9091
CLC	Bai Bac	BB_26_G_G51.JPG	15/9/2019	1LC	2.5	108.491	15.9581
CLC	Hon Tai	HT_DR_45_G5.JPG	18/9/2019	3LC	9.4	108.534	15.9091
CLC	Hon Kho	HKC_O1_2_6_G3.JPG	12/9/2019	1LC	2.5	108.418	15.9721
CLC	Hon Kho	HKM_O3_3_3_G5.JPG	12/9/2019	1LC	2.5	108.421	15.9727
CLC	Bai Chong-Bai Bim	BBi_O1_P1_G5.JPG	21/9/2019	1LC	2.6	108.515	15.9383
CLC	Hon Tai	HT_DR_47_G4.JPG	18/9/2019	3LC		108.534	15.9093
CLC	Bai Chong-Bai Bim	BBi_O1_P1_G5.JPG	21/9/2019	1LC	2.6	108.515	15.9383
CLC	Hon Tai	HT_DR_48_G1.JPG	19/9/2019	3LC		108.54	15.9117
CLC	Hon Tai	HT_DR_48_G2.JPG	19/9/2019	3LC		108.54	15.9117
CLC	Hon Tai	HT_DR_48_G3.JPG	19/9/2019	3LC		108.539	15.9117
CLC	Hon Tai	HT_DR_49_G3.JPG	19/9/2019	3LC		108.54	15.9125
CLC	Bai Chong-Bai Bim	BBi_DR_8_G3.JPG	21/9/2019	1LC	2.7	108.516	15.9384
CLC	Hon Tai	HT_DR_5_G1.JPG	18/9/2019	3LC		108.54	15.9033
CLC	Hon Tai	HT_DR_5_G2.JPG	18/9/2019	3LC		108.54	15.9034
CLC	Hon Tai	HT_DR_5_G3.JPG	18/9/2019	3LC		108.54	15.9034
CLC	Hon Tai	HT_DR_5_G4.JPG	18/9/2019	3LC		108.54	15.9033
CLC	Hon Tai	HT_DR_5_G5.JPG	18/9/2019	3LC	7.2	108.54	15.9034
CLC	Hon Tai	HT_DR_50_G34.JPG	19/9/2019	3LC		108.539	15.9117
CLC	Hon Tai	HT_DR_50_G4.JPG	19/9/2019	3LC		108.539	15.9117
CLC	Hon Tai	HT_DR_52_G2.JPG	19/9/2019	3LC		108.539	15.9116
CLC	Bai Lang -Bai Xep	BX_O4_P4_G5.JPG	22/9/2019	1LC	2.7	108.508	15.9494
CLC	Bai Huong	BH_DR_2_G5.JPG	20/9/2019	1LC	2.8	108.531	15.9263
CLC	Bai Chong-Bai Bim	BBi_O3_P2_G5.JPG	21/9/2019	1LC	2.8	108.516	15.9386
CLC	Hon Tai	HT_O8_G_G5.JPG	18/9/2019	1LC	2.8	108.532	15.9058
CLC	Hon Dai	HD_DR_14_G5.JPG	17/9/2019	1LC	2.9	108.479	15.9471
CLC	Hon Tai	HT_DR_56_G1.JPG	19/9/2019	3LC		108.539	15.9113
CLC	Hon Tai	HT_DR_56_G2.JPG	19/9/2019	3LC		108.539	15.9113
CLC	Hon Tai	HT_DR_56_G4.JPG	19/9/2019	3LC		108.539	15.9112
CLC	Hon Tai	HT_DR_56_G5.JPG	19/9/2019	3LC	4.9	108.539	15.9113
CLC	Hon Tai	HT_DR_57_G1.JPG	19/9/2019	HB		108.539	15.9111
CLC	Hon Tai	HT_DR_57_G2.JPG	19/9/2019	S		108.539	15.9111
CLC	Hon Tai	HT_DR_57_G3.JPG	19/9/2019	HB		108.539	15.9111
CLC	Hon Tai	HT_DR_58_G1.JPG	19/9/2019	3LC		108.539	15.9111
CLC	Hon Tai	HT_DR_58_G3.JPG	19/9/2019	3LC		108.539	15.9112
CLC	Hon Tai	HT_DR_58_G4.JPG	19/9/2019	3LC		108.539	15.9111
CLC	Hon Tai	HT_DR_58_G5.JPG	19/9/2019	3LC		108.539	15.9111
CLC	Hon Dai	HD_DR_28_G2.JPG	17/9/2019	1LC	2.9	108.483	15.9484
CLC	Hon Tai	HT_DR_59_G4.JPG	19/9/2019	3LC		108.539	15.9112
CLC	Bai Ong	BO_O4_P4_G3.JPG	15/9/2019	2LC	2.8	108.495	15.9558
CLC	Hon La	HLN_O3_1_5_G5.JPG	13/9/2019	2LC	2.8	108.445	15.969
CLC	Bai Ong	BO_O6_P2_G5.JPG	15/9/2019	2LC	2.9	108.496	15.9559
CLC	Bai Bac	BB_18_P4_G5.JPG	15/9/2019	2LC	2.9	108.49	15.9603
CLC	Hon Dai	HD_DR_15_G5.JPG	17/9/2019	1LC	3	108.479	15.9472
CLC	Hon Tai	HT_DR_61_G1.JPG	19/9/2019	3LC		108.539	15.911
CLC	Hon Tai	HT_DR_61_G2.JPG	19/9/2019	3LC		108.539	15.9111
CLC	Hon Tai	HT_DR_61_G3.JPG	19/9/2019	3LC		108.539	15.9111
CLC	Hon Tai	HT_DR_61_G4.JPG	19/9/2019	3LC		108.539	15.911
CLC	Hon Tai	HT_DR_61_G5.JPG	19/9/2019	3LC		108.539	15.9111
CLC	Hon Tai	HT_DR_63_G5.JPG	19/9/2019	3LC		108.539	15.911
CLC	Hon Tai	HT_DR_64_G2.JPG	19/9/2019	3LC		108.539	15.911
CLC	Hon Tai	HT_DR_64_G3.JPG	19/9/2019	3LC		108.538	15.911
CLC	Bai Ban	BN_DR_11_G2.JPG	19/9/2019	2LC	3	108.533	15.9245
CLC	Hon Tai	HT_DR_8_G5.JPG	18/9/2019	4LC	3.5	108.54	15.9036
CLC	Hon Tai	HT_DR_9_G1.JPG	18/9/2019	4LC		108.54	15.9035
CLC	Hon Tai	HT_DR_9_G2.JPG	18/9/2019	4LC		108.54	15.9036
CLC	Hon Tai	HT_DR_9_G3.JPG	18/9/2019	4LC		108.54	15.9036
CLC	Hon Tai	HT_DR_9_G4.JPG	18/9/2019	4LC		108.54	15.9035
CLC	Hon Tai	HT_DR_9_G5.JPG	18/9/2019	4LC	2.8	108.54	15.9036
CLC	Hon Tai	HT_O2_G_G1.JPG	18/9/2019	3LC		108.54	15.9035
CLC	Hon Tai	HT_O2_G_G3.JPG	18/9/2019	4LC		108.54	15.9035
CLC			18/9/2019	D	21	108.532	15.9096
CLC	Hon Tai	HT_O2_G_G4.JPG	18/9/2019	4LC		108.54	15.9035
CLC	Hon Tai	HT_O2_G_G5.JPG	18/9/2019	4LC	3.7	108.54	15.9035
CLC	Hon Tai	HT_O2_P1_G1.JPG	18/9/2019	3LC		108.54	15.9034
CLC	Hon Tai	HT_O2_P1_G2.JPG	18/9/2019	4LC		108.54	15.9035
CLC	Hon Tai	HT_O2_P1_G3.JPG	18/9/2019	3LC		108.54	15.9035
CLC	Hon Tai	HT_O2_P1_G4.JPG	18/9/2019	3LC		108.54	15.9034
CLC	Hon Tai	HT_O2_P1_G5.JPG	18/9/2019	3LC	3.6	108.54	15.9034
CLC	Hon Tai	HT_O2_P2_G1.JPG	18/9/2019	4LC		108.54	15.9035
CLC	Hon Tai	HT_O2_P2_G3.JPG	18/9/2019	4LC		108.54	15.9035
CLC	Hon Tai	HT_O2_P2_G4.JPG	18/9/2019	4LC		108.54	15.9035
CLC	Hon Tai	HT_O2_P2_G5.JPG	18/9/2019	4LC	2.8	108.54	15.9035
CLC	Hon Tai	HT_O2_P3_G1.JPG	18/9/2019	4LC		108.54	15.9035
CLC	Hon Tai	HT_O2_P3_G2.JPG	18/9/2019	4LC		108.54	15.9036
CLC	Hon Tai	HT_O2_P3_G3.JPG	18/9/2019	4LC		108.54	15.9036
CLC	Hon Tai	HT_O2_P3_G4.JPG	18/9/2019	4LC		108.54	15.9035
CLC	Hon Tai	HT_O2_P3_G5.JPG	18/9/2019	4LC	3.8	108.54	15.9035
CLC	Hon Tai	HT_O2_P4_G1.JPG	18/9/2019	4LC		108.54	15.9035
CLC	Hon Tai	HT_O2_P4_G2.JPG	18/9/2019	4LC		108.54	15.9035
CLC	Bai Huong	BH_O6_G_G5.JPG	20/9/2019	2LC	3	108.53	15.9289
CLC	Bai Chong-Bai Bim	BBi_DR_9_G2.JPG	21/9/2019	2LC	3	108.515	15.9384
CLC	Hon Tai	HT_O2_P4_G5.JPG	18/9/2019	4LC	3.2	108.54	15.9035
CLC	Hon Tai	HT_O3_G_G2.JPG	18/9/2019	S		108.54	15.9037
CLC	Hon Tai	HT_O3_G_G21.JPG	18/9/2019	S	2.5	108.54	15.9037
CLC	Bai Chong-Bai Bim	BBi_DR_9_G2.JPG	21/9/2019	2LC	3	108.515	15.9384
CLC	Hon Tai	HT_O3_P2_G5.JPG	18/9/2019	S		108.54	15.9037
CLC	Hon Tai	HT_O3_P3_G5.JPG	18/9/2019	S	2.2	108.54	15.9037
CLC	Bai Bac	BB_O1_3_1_G5.JPG	14/9/2019	HB	1.3	108.488	15.9628
CLC	Hon Tai	HT_O3_P4_G2.JPG	18/9/2019	S	3.4	108.54	15.9037
CLC	Hon Tai	HT_O4_G_G1.JPG	18/9/2019	3LC		108.54	15.9034
CLC	Bai Lang -Bai Xep	BX_O1_P4_G5.JPG	22/9/2019	2LC	3	108.507	15.9531
CLC	Hon Tai	HT_O4_G_G3.JPG	18/9/2019	3LC		108.54	15.9035
CLC	Bai Bac	BB_O5_3_5_G2.JPG	14/9/2019	2LC	3	108.485	15.9633
CLC	Hon Tai	HT_O4_G_G5.JPG	18/9/2019	3LC		108.54	15.9034
CLC	Hon Tai	HT_O4_P1_G5.JPG	18/9/2019	3LC	4.5	108.54	15.9034
CLC	Hon Tai	HT_O4_P2_G2.JPG	18/9/2019	3LC		108.54	15.9034
CLC	Hon Tai	HT_O4_P2_G5.JPG	18/9/2019	3LC	5.7	108.54	15.9034
CLC	Hon Tai	HT_O4_P3_G1.JPG	18/9/2019	3LC		108.54	15.9034
CLC	Bai Bac	BB_O4_1_10_G2.JPG	14/9/2019	2LC	3	108.484	15.9643
CLC	Hon Tai	HT_O4_P3_G5.JPG	18/9/2019	HB	4.7	108.54	15.9034
CLC	Hon Tai	HT_O4_P4_G1.JPG	18/9/2019	3LC		108.54	15.9035
CLC	Hon Tai	HT_O4_P4_G2.JPG	18/9/2019	3LC		108.54	15.9035
CLC	Hon Tai	HT_O4_P4_G3.JPG	18/9/2019	3LC		108.54	15.9035
CLC	Hon Tai	HT_O4_P4_G5.JPG	18/9/2019	3LC	4.5	108.54	15.9035
CLC	Hon Tai	HT_O5_G_G1.JPG	18/9/2019	4LC		108.539	15.9032
CLC	Hon Tai	HT_O5_P1_G1.JPG	18/9/2019	4LC		108.539	15.9032
CLC	Hon Tai	HT_O5_P1_G2.JPG	18/9/2019	4LC		108.539	15.9033
CLC	Hon Tai	HT_O5_P1_G3.JPG	18/9/2019	4LC		108.539	15.9032
CLC	Hon Tai	HT_O5_P1_G4.JPG	18/9/2019	4LC		108.539	15.9032
CLC	Hon Tai	HT_O5_P1_G5.JPG	18/9/2019	HB	5.9	108.539	15.9033
CLC	Hon Tai	HT_O5_P2_G5.JPG	18/9/2019	4LC	6	108.539	15.9032
CLC	Hon Tai	HT_O5_P3_G1.JPG	18/9/2019	3LC		108.539	15.9032
CLC	Hon La	HLN_O1_1_10_G5.JPG	13/9/2019	1LC	3	108.443	15.9706
CLC	Hon Tai	HT_O5_P4_G1.JPG	18/9/2019	3LC		108.539	15.9032
CLC	Hon La	HLN_O4_1_5_G5.JPG	13/9/2019	2LC	3	108.446	15.9678
CLC	Hon Kho	HKM_O1_1_10_G5.JPG	12/9/2019	2LC	3	108.422	15.9722
CLC	Bai Lang -Bai Xep	BX_O3_P4_G1.JPG	22/9/2019	2LC	3.1	108.508	15.9514
CLC	Bai Lang -Bai Xep	BX_O1_P1_G5.JPG	22/9/2019	2LC	3.1	108.507	15.9532
CLC			19/9/2019	D		108.537	15.921
CLC			19/9/2019	D		108.536	15.921
CLC			19/9/2019	D		108.537	15.9211
CLC			19/9/2019	D	16.4	108.536	15.9211
CLC			19/9/2019	D	15	108.534	15.9216
CLC			19/9/2019	D	16.4	108.537	15.9218
CLC			19/9/2019	D	17	108.539	15.9219
CLC	Mui Dua	MDUA_DR_09_G4.JPG	19/9/2019	3LC		108.537	15.922
CLC	Mui Dua	MDUA_DR_09_G3.JPG	19/9/2019	3LC		108.537	15.9221
CLC	Mui Dua		19/9/2019	3LC		108.537	15.9222
CLC			19/9/2019	D	14	108.533	15.9224
CLC	Bai Ong	BO_O6_P3_G5.JPG	15/9/2019	2LC	3.1	108.496	15.9559
CLC	Bai Ong	BO_13_P1_G5.JPG	15/9/2019	2LC	3.1	108.497	15.957
CLC	Bai Bac	BB_18_P2_G5.JPG	15/9/2019	2LC	3.1	108.489	15.9603
CLC	Bai Bac	BB_N13_DR_2_G5.JPG	14/9/2019	2LC	3.1	108.484	15.964
CLC	Bai Huong	BH_DR_3_G5.JPG	20/9/2019	1LC	3.1	108.53	15.9269
CLC	Bai Ban	BN_DR_4_G2.JPG	19/9/2019	3LC	3.2	108.533	15.9239
CLC	Bai Ban	BN_DR_3_G5.JPG	19/9/2019	3LC		108.534	15.9239
CLC	Bai Bac	BB_18_P3_G5.JPG	15/9/2019	1LC	3.1	108.49	15.9603
CLC	Bai Chong-Bai Bim	BBi_DR_18_G1.JPG	21/9/2019	2LC	3.2	108.516	15.9384
CLC	Bai Chong-Bai Bim	BBi_O3_P4_G3.JPG	21/9/2019	2LC	3.2	108.516	15.9385
CLC	Bai Ong	BO_O4_P2_G3.JPG	15/9/2019	2LC	3.2	108.495	15.9558
CLC	Bai Ong	BO_13_P3_G2.JPG	15/9/2019	2LC	3.2	108.497	15.9569
CLC	Bai Bac	BB_O7_1_8_G5.JPG	14/9/2019	2LC	3.2	108.486	15.9622
CLC	Bai Ban	BN_DR_7_G2.JPG	19/9/2019	3LC	2.8	108.533	15.9242
CLC			20/9/2019	D	15	108.53	15.9242
CLC	Bai Ban	BN_DR_8_G5.JPG	19/9/2019	3LC	1.9	108.533	15.9243
CLC	Hon Mo	HM_O3_P1_G5.JPG	16/9/2019	1LC	3.2	108.476	15.9332
CLC	Bai Ban	BN_DR_10_G2.JPG	19/9/2019	3LC	2.5	108.533	15.9244
CLC	Hon Mo	HM_O2_G_G5.JPG	16/9/2019	1LC	3.2	108.475	15.9334
CLC	Bai Lang -Bai Xep	BX_O5_G_G5.JPG	22/9/2019	1LC	3.2	108.508	15.9477
CLC	Hon La	HLN_O3_1_3_G5.JPG	13/9/2019	1LC	3.2	108.445	15.9689
CLC	Hon Mo	HM_O7_P1_G5.JPG	16/9/2019	1LC	3.3	108.472	15.932
CLC	Bai Bac	BB_O5_3_4_G2.JPG	14/9/2019	2LC	3.2	108.485	15.9632
CLC	Bai Chong-Bai Bim	BC_DR_10_G5.JPG	22/9/2019	1LC	3.3	108.509	15.9435
CLC	Bai Bac	BB_O5_2_1_G5.JPG	14/9/2019	2LC	3.2	108.485	15.9633
CLC	Hon La	HLN_O3_3_2_G5.JPG	13/9/2019	2LC	3.2	108.445	15.9688
CLC	Hon La	HLN_O3_1_1_G5.JPG	13/9/2019	2LC	3.2	108.445	15.9689
CLC	Hon Kho	HKM_O3_1_1_G2.JPG	12/9/2019	2LC	3.2	108.421	15.9728
CLC	Hon La	HLN1_DR_07_G5.JPG	13/9/2019	1LC	3.3	108.448	15.9671
CLC	Hon Dai	HD_O2_P1_G4.JPG	17/9/2019	4LC		108.478	15.9454
CLC	Bai Bac	BB_O1_3_2_G5.JPG	14/9/2019	HB	1.8	108.488	15.9628
CLC	Hon Tai	HT_DR_46_G5.JPG	18/9/2019	1LC	3.4	108.534	15.9092
CLC	Bai Ban	BN_O3_G_G5.JPG	19/9/2019	1LC	3.4	108.533	15.9244
CLC	Hon Mo	HM_DR_9_G5.JPG	16/9/2019	1LC	3.4	108.471	15.9323
CLC	Bai Chong-Bai Bim	BBi_DR_6_G5.JPG	21/9/2019	1LC	3.4	108.516	15.9384
CLC	Bai Bac	BB_O13_G_G5.JPG	15/9/2019	HB	1.1	108.49	15.9618
CLC	Hon Dai	HD_18_G_G2.JPG	17/9/2019	4LC		108.484	15.9442
CLC	Hon Dai	HD_22_P2_G5.JPG	17/9/2019	4LC		108.483	15.9415
CLC	Bai Bac	BB_O13_P1.JPG	15/9/2019	HB	1.2	108.49	15.9618
CLC	Bai Chong-Bai Bim	BBi_DR_6_G5.JPG	21/9/2019	1LC	3.4	108.516	15.9385
CLC	Bai Lang -Bai Xep	BX_O8_P1_G5.JPG	22/9/2019	2LC	3.3	108.508	15.9461
CLC	Hon La	HLN_O3_2_10_G5.JPG	13/9/2019	2LC	3.3	108.445	15.9687
CLC	Hon La	HLN1_DR_22_G2.JPG	13/9/2019	2LC	3.3	108.451	15.973
CLC	Bai Ban	BN_O3_P4_G3.JPG	19/9/2019	2LC	3.4	108.533	15.9245
CLC	Bai Bac	BB_11_P2_G3.JPG	15/9/2019	S		108.489	15.9619
CLC	Hon Dai	HD_23_P1_G4.JPG	17/9/2019	4LC		108.482	15.9407
CLC	Bai Huong	BH_DR_23_G5.JPG	20/9/2019	2LC	3.4	108.529	15.9291
CLC	Hon Dai	HD_16_P1_G2.JPG	17/9/2019	2LC	3.4	108.484	15.9453
CLC	Bai Ban	BN_O6_G_G5.JPG	19/9/2019	3LC	3.4	108.532	15.9254
CLC	Hon La	HLN_O3_1_4_G5.JPG	13/9/2019	2LC	3.4	108.445	15.969
CLC	Bai Ban	BN_O6_P2_G2.JPG	19/9/2019	3LC	3	108.532	15.9254
CLC	Bai Ban	BN_O6_G_G3.JPG	19/9/2019	3LC	2.5	108.532	15.9254
CLC	Bai Bac	BB_11_P2_G4.JPG	15/9/2019	S		108.489	15.9619
CLC	Bai Bac	BB_O2_3_3_G5.JPG	14/9/2019	2LC	3.5	108.488	15.9622
CLC	Bai Bac	BB_11_P2_G5.JPG	15/9/2019	S	4	108.489	15.9619
CLC	Hon Kho	HKM_O2_1_2_G4.JPG	12/9/2019	2LC	3.5	108.422	15.9724
CLC	Hon Tai	HT_O6_G_G5.JPG	18/9/2019	2LC	3.6	108.532	15.9053
CLC	Bai Ban	BN_DR_19_G5.JPG	19/9/2019	3LC	2	108.532	15.9254
CLC	Bai Ban	BN_O3_P4_G5.JPG	19/9/2019	2LC	3.6	108.533	15.9245
CLC	Bai Ban	BN_O5_P2_G5.JPG	19/9/2019	2LC	3.6	108.532	15.9252
CLC	Bai Huong	BH_O6_P1_G5.JPG	20/9/2019	2LC	3.6	108.53	15.9289
CLC	Bai Chong-Bai Bim	BC_02_P1_G5.JPG	22/9/2019	2LC	3.6	108.509	15.9434
CLC	Bai Bac	BB_O3_3_7_G1.JPG	14/9/2019	2LC	3.6	108.488	15.9621
CLC	Bai Bac	BB_O3_3_5_G5.JPG	14/9/2019	2LC	3.6	108.488	15.9622
CLC	Hon La	HLN_O3_2_1_G5.JPG	13/9/2019	2LC	3.6	108.444	15.9689
CLC	Hon Tai	HT_O3_P1_G5.JPG	18/9/2019	2LC	3.7	108.54	15.9036
CLC	Bai Lang -Bai Xep	BX_O2_P4_G2.JPG	22/9/2019	2LC	3.7	108.508	15.9523
CLC	Bai Bac	BB_11_P3_G5.JPG	15/9/2019	S	4.1	108.489	15.9619
CLC	Bai Chong-Bai Bim	BBi_DR_6_G5.JPG	21/9/2019	1LC	3.4	108.515	15.9385
CLC	Bai Huong		20/9/2019	D	15.5	108.529	15.9267
CLC	Bai Huong		20/9/2019	D	14	108.53	15.9267
CLC	Bai Bac	BB_11_P4_G4.JPG	15/9/2019	S		108.489	15.9619
CLC	Bai Bac	BB_O13_P2.JPG	15/9/2019	HB	0.9	108.49	15.9619
CLC	Bai Bac	BB_N15_DR_04.JPG	15/9/2019	S	0.8	108.491	15.9597
CLC	Hon Dai	HD_18_P4_G1.JPG	17/9/2019	4LC		108.484	15.9442
CLC	Bai Bac	BB_O6_3_2_G5.JPG	14/9/2019	2LC	3.7	108.485	15.9629
CLC	Hon Dai	HD_DR_29_G5.JPG	17/9/2019	1LC	3.4	108.483	15.9486
CLC	Bai Ong	BO_13_P4_G5.JPG	15/9/2019	2LC	3.8	108.497	15.9569
CLC	Hon La	HLN_O1_2_1_G5.JPG	13/9/2019	2LC	3.8	108.443	15.9705
CLC	Hon Mo	HM_O6_P4_G5.JPG	16/9/2019	2LC	3.9	108.476	15.9313
CLC	Hon La	HLN_O4_1_1_G5.JPG	13/9/2019	1LC	3.4	108.446	15.9677
CLC	Hon Dai	HD_DR_94_G5.JPG	16/9/2019	1LC	3.5	108.477	15.9418
CLC	Hon Dai	HD_O7_P3_G5.JPG	17/9/2019	1LC	3.5	108.482	15.9485
CLC	Bai Lang -Bai Xep	BX_DR_22_G5.JPG	22/9/2019	2LC	3.9	108.508	15.9506
CLC	Hon Dai	HD_O4_P2_G5.JPG	17/9/2019	1LC	3.6	108.478	15.9465
CLC	Bai Bac	BB_N15_DR_05.JPG	15/9/2019	S	0.9	108.491	15.9596
CLC	Bai Bac	BB_14_G_G2.JPG	15/9/2019	2LC	3.9	108.489	15.9613
CLC	Bai Lang -Bai Xep	BX_O4_P2_G2.JPG	22/9/2019	1LC	3.6	108.508	15.9494
CLC	Hon Kho	HKM_O3_2_1_G5.JPG	12/9/2019	1LC	3.6	108.421	15.9726
CLC	Bai Ban	BN_O5_G_G5.JPG	19/9/2019	1LC	3.7	108.532	15.925
CLC	Bai Bac	BB_O5_3_9_G2.JPG	14/9/2019	1LC	3.7	108.485	15.9634
CLC	Hon Tai	HT_10_P3_G5.JPG	18/9/2019	1LC	3.8	108.533	15.908
CLC	Hon Dai	HD_27_P2_G5.JPG	16/9/2019	1LC	3.8	108.477	15.9421
CLC	Bai Ban	BN_O2_P2_G2.JPG	19/9/2019	2LC	4	108.533	15.9241
CLC	Bai Bac	BB_N15_DR_06.JPG	15/9/2019	S	1	108.491	15.9594
CLC	Bai Huong	BH_O3_P2_G2.JPG	20/9/2019	3LC		108.53	15.9277
CLC	Bai Ban	BN_O2_P2_G5.JPG	19/9/2019	2LC	4	108.533	15.9241
CLC	Bai Ban	BN_O7_P4_G3.JPG	19/9/2019	2LC	4	108.532	15.9253
CLC	Hon Tai	HT_O7_P3_G2.JPG	18/9/2019	2LC	4	108.532	15.9055
CLC	Bai Bac	BB_O3_3_4_G5.JPG	14/9/2019	2LC	4	108.488	15.9622
CLC	Hon Tai	HT_O6_P4_G5.JPG	18/9/2019	2LC	4.1	108.532	15.9053
CLC	Bai Bac	BB_N15_DR_07.JPG	15/9/2019	S		108.491	15.9593
CLC	Hon Dai	HD_DR_49_G5.JPG	17/9/2019	1LC	3.8	108.484	15.9444
CLC	Bai Bac	BB_N19_DR_131_G21.JPG	15/9/2019	S		108.492	15.9568
CLC	Bai Huong	BH_O4_P3_G3.JPG	20/9/2019	3LC		108.53	15.9281
CLC	Bai Huong	BH_O4_P4_G2.JPG	20/9/2019	3LC		108.53	15.9281
CLC	Bai Huong	BH_O4_P3_G5.JPG	20/9/2019	3LC	3.1	108.53	15.9281
CLC	Bai Huong	BH_O4_P4_G5.JPG	20/9/2019	3LC	2.8	108.53	15.9282
CLC	Bai Huong	BH_DR_15_G5.JPG	20/9/2019	3LC	2.1	108.53	15.9282
CLC	Bai Bac	BB_N19_DR_131_G11.JPG	15/9/2019	S		108.492	15.9568
CLC	Hon Tai	HT_O9_P2_G5.JPG	18/9/2019	1LC	3.8	108.532	15.906
CLC	Hon Tai	HT_DR_7_G5.JPG	18/9/2019	2LC	4.2	108.54	15.9035
CLC	Bai Ban	BN_DR_28_G51.JPG	20/9/2019	2LC	4.2	108.531	15.9255
CLC	Bai Ban	BN_DR_28_G5.JPG	20/9/2019	2LC	4.2	108.531	15.9256
CLC	Bai Ban	BN_DR_28_G51.JPG	20/9/2019	2LC	4.2	108.531	15.9256
CLC	Bai Bac	BB_N19_DR_131_G12.JPG	15/9/2019	S		108.492	15.9568
CLC	Bai Lang -Bai Xep	BX_O9_P4_G1.JPG	22/9/2019	1LC	3.8	108.508	15.9456
CLC	Bai Ban	BN_DR_28_G5.JPG	20/9/2019	2LC	4.2	108.531	15.9256
CLC	Bai Huong		20/9/2019	D	15.6	108.527	15.9285
CLC	Hon Dai	HD_DR_30_G5.JPG	17/9/2019	1LC	3.8	108.483	15.9486
CLC	Bai Huong	BH_DR_11_G5.JPG	20/9/2019	2LC	4.2	108.53	15.9277
CLC	Hon Mo	HM_DR_13_G5.JPG	16/9/2019	2LC	4.2	108.472	15.9312
CLC	Bai Ong	BO_11_P1_G3.JPG	15/9/2019	2LC	4.2	108.496	15.9565
CLC	Bai Ong	BO_12_P2_G5.JPG	15/9/2019	2LC	4.2	108.497	15.9568
CLC	Bai Lang -Bai Xep	BX_DR_52_G3.JPG	22/9/2019	2LC	4.3	108.508	15.9466
CLC	Bai Ong	BO_O9_P2_G5.JPG	15/9/2019	2LC	4.3	108.496	15.9562
CLC	Bai Huong	BH_DR_24_G5.JPG	20/9/2019	3LC	2.6	108.529	15.9292
CLC	Bai Bac	BB_15_P1_G5.JPG	15/9/2019	1LC	3.8	108.489	15.9608
CLC	Hon La	HLD_O1_P2_G5.JPG	13/9/2019	1LC	3.8	108.447	15.9762
CLC	Hon Tai	HT_12_P1_G2.JPG	18/9/2019	1LC	3.9	108.534	15.9083
CLC	Hon Mo	HM_O8_G_G5.JPG	16/9/2019	1LC	3.9	108.472	15.9314
CLC	Hon La	HLN_DR_11_G2.JPG	13/9/2019	2LC	4.3	108.445	15.9682
CLC	Hon Kho	HKM_O2_2_2_G5.JPG	12/9/2019	2LC	4.3	108.422	15.9723
CLC	Hon Tai	HT_O8_P4_G5.JPG	18/9/2019	1LC	3.9	108.532	15.9058
CLC	Hon Dai	HD_14_P2_G1.JPG	17/9/2019	1LC	3.9	108.485	15.9459
CLC	Bai Bac	BB_N19_DR_131_G13.JPG	15/9/2019	S		108.492	15.9568
CLC	Bai Bac	BB_N19_DR_60_G5.JPG	15/9/2019	1LC	3.9	108.489	15.9609
CLC	Bai Bac	BB_N13_DR_6_G5.JPG	14/9/2019	1LC	3.9	108.486	15.9632
CLC	Hon Dai	HD_O3_P3_G5.JPG	17/9/2019	1LC	4	108.478	15.946
CLC	Bai Ban	BN_O5_P3_G5.JPG	19/9/2019	1LC	4.2	108.532	15.925
CLC	Hon Mo	HM_O8_P1_G5.JPG	16/9/2019	1LC	4.2	108.472	15.9314
CLC	Hon Dai	HD_O1_P3_G5.JPG	17/9/2019	1LC	4.2	108.477	15.9445
CLC	Bai Huong	BH_DR_36_G51.JPG	20/9/2019	3LC	1.3	108.529	15.9302
CLC	Bai Bac	BB_N19_DR_131_G1.JPG	15/9/2019	S		108.492	15.9568
CLC	Bai Huong	BH_DR_35_G52.JPG	20/9/2019	3LC	1.5	108.529	15.9302
CLC	Bai Huong	BH_DR_35_G54.JPG	20/9/2019	3LC		108.529	15.9303
CLC	Bai Huong	BH_DR_35_G50.JPG	20/9/2019	3LC		108.529	15.9303
CLC	Bai Huong	BH_DR_35_G55.JPG	20/9/2019	3LC		108.529	15.9304
CLC	Bai Ong	BB_N19_DR_148_G21.JPG	15/9/2019	S		108.493	15.9553
CLC	Bai Ong	BB_N19_DR_148_G22.JPG	15/9/2019	S		108.493	15.9554
CLC	Bai Ong	BB_N19_DR_148_G23.JPG	15/9/2019	S		108.494	15.9553
CLC	Bai Ong	BB_N19_DR_148_G24.JPG	15/9/2019	S		108.494	15.9555
CLC	Bai Ong	BB_N19_DR_148_G25.JPG	15/9/2019	S		108.494	15.9554
CLC	Bai Huong	BH_DR_38_G5.JPG	20/9/2019	3LC	1.6	108.528	15.9312
CLC	Bai Bac	BB_O13_P3.JPG	15/9/2019	HB	0.7	108.49	15.9618
CLC	Bai Bac	BB_O3_1_1_G51.JPG	14/9/2019	HB		108.488	15.9624
CLC	Bai Huong	BH_DR_42_G5.JPG	20/9/2019	3LC	2.8	108.527	15.9313
CLC	Bai Ong	BB_N19_DR_148_G2.JPG	15/9/2019	S		108.494	15.9555
CLC	Hon Dai	HD_23_P4_G1.JPG	17/9/2019	4LC		108.482	15.9406
CLC	Bai Bac	BB_O3_1_1_G52.JPG	14/9/2019	HB		108.488	15.9624
CLC	Bai Huong	BH_DR_39_G5.JPG	20/9/2019	3LC	1.2	108.528	15.9313
CLC	Hon Dai	HD_23_P4_G4.JPG	17/9/2019	4LC		108.482	15.9406
CLC	Bai Bac	BB_O3_1_1_G5.JPG	14/9/2019	HB		108.488	15.9624
CLC	Bac CLC	BB_N19_DR_18_G3.JPG	14/9/2019	S	4.2	108.49	15.9681
CLC	Hon Dai	HD_18_G_G1.JPG	17/9/2019	4LC		108.484	15.9441
CLC	Hon Dai	HD_23_G_G3.JPG	17/9/2019	4LC		108.482	15.9407
CLC	Bai Bac	BB_O1_1_3_G52.JPG	14/9/2019	S		108.488	15.9627
CLC	Bai Bac	BB_O1_1_3_G53.JPG	15/9/2019	S		108.489	15.9627
CLC	Bai Bac	BB_N19_DR_129_G51.JPG	15/9/2019	1LC	4.2	108.492	15.9572
CLC	Hon Mo	HM_O8_P3_G5.JPG	16/9/2019	HB	4.7	108.472	15.9313
CLC	Hon Dai	HD_10_P2_G5.JPG	17/9/2019	4LC	2.7	108.485	15.9466
CLC	Bai Bac	BB_O3_1_1_G5.JPG	14/9/2019	HB		108.488	15.9624
CLC	Hon Dai	HD_11_P3_G4.JPG	17/9/2019	4LC		108.485	15.9464
CLC	Hon Dai	HD_11_P2_G5.JPG	17/9/2019	4LC	2.6	108.485	15.9464
CLC	Hon Dai	HD_10_P3_G1.JPG	17/9/2019	4LC		108.485	15.9465
CLC	Bai Bac	BB_O3_1_2_G5.JPG	14/9/2019	HB	1.6	108.488	15.9624
CLC	Bai Bac	BB_O3_1_3_G5.JPG	14/9/2019	HB		108.488	15.9623
CLC	Hon Dai	HD_23_P4_G5.JPG	17/9/2019	4LC	4.5	108.482	15.9406
CLC	Bai Bac	BB_O1_1_3_G55.JPG	15/9/2019	S		108.489	15.9626
CLC	Hon Dai	HD_19_P4_G1.JPG	17/9/2019	4LC		108.484	15.9436
CLC	Bai Bac	BB_O3_1_7_G5.JPG	14/9/2019	HB		108.487	15.9623
CLC	Bai Bac	BB_O1_1_3_G56.JPG	15/9/2019	S		108.489	15.9627
CLC	Bai Bac	BB_O1_1_3_G57.JPG	14/9/2019	S		108.488	15.9629
CLC	Bai Bac	BB_O1_1_3_G59.JPG	14/9/2019	S		108.488	15.9628
CLC	Hon Mo	HM_O8_P3_G2.JPG	16/9/2019	HB		108.472	15.9313
CLC	Hon Mo	HM_O8_P3_G1.JPG	16/9/2019	HB		108.472	15.9313
CLC	Bai Bac	BB_19_P4_G5.JPG	15/9/2019	1LC	4.2	108.49	15.96
CLC	Hon Tai	HT_12_P5_G5.JPG	18/9/2019	1LC	4.3	108.534	15.9083
CLC	Hon Dai	HD_12_P4_G5.JPG	17/9/2019	4LC	3.1	108.485	15.9462
CLC	Hon Dai	HD_12_P4_G2.JPG	17/9/2019	4LC		108.485	15.9462
CLC	Bai Bac	BB_O1_1_3_G50.JPG	15/9/2019	S		108.489	15.9627
CLC	Bai Bac	BB_O1_1_3_G511.JPG	14/9/2019	S		108.488	15.9629
CLC	Hon Tai	HT_15_P4_G5.JPG	18/9/2019	1LC	4.3	108.534	15.9091
CLC	Hon Tai	HT_DR_39_G2.JPG	18/9/2019	1LC	4.3	108.534	15.9085
CLC	Bai Chong-Bai Bim	BC_02_P2_G5.JPG	22/9/2019	1LC	4.3	108.509	15.9434
CLC	Bai Bac	BB_21_P4_G5.JPG	15/9/2019	1LC	4.3	108.49	15.9595
CLC	Bai Bac	BB_N19_DR_59_G2.JPG	15/9/2019	1LC	4.3	108.489	15.961
CLC	Hon Tai	HT_14_P4_G5.JPG	18/9/2019	1LC	4.4	108.534	15.9088
CLC	Bai Ban	BN_DR_17_G2.JPG	19/9/2019	1LC	4.4	108.532	15.925
CLC	Hon Tai	HT_DR_23_G5.JPG	18/9/2019	1LC	4.5	108.532	15.9061
CLC	Hon Mo	HM_O7_P4_G5.JPG	16/9/2019	3LC	4.1	108.472	15.9319
CLC	Hon Tai	HT_O6_P2_G2.JPG	18/9/2019	4LC		108.532	15.9038
CLC	Hon Mo	HM_O7_P4_G4.JPG	16/9/2019	4LC		108.472	15.9318
CLC	Hon Mo	HM_O7_P4_G3.JPG	16/9/2019	3LC		108.472	15.932
CLC	Hon Mo	HM_O7_P4_G2.JPG	16/9/2019	3LC		108.472	15.932
CLC	Hon Mo	HM_O7_P4_G1.JPG	16/9/2019	3LC		108.472	15.9319
CLC	Hon Mo	HM_O7_P3_G4x.JPG	16/9/2019	4LC		108.472	15.9319
CLC	Hon Tai	HT_O6_P1_G5.JPG	18/9/2019	2LC	4.4	108.532	15.9053
CLC	Hon Dai	HD_O6_G_G5.JPG	17/9/2019	1LC	4.6	108.481	15.9486
CLC	Hon Dai	HD_DR_71_G5.JPG	17/9/2019	4LC	6.1	108.482	15.9404
CLC	Hon Mo	HM_O7_P3_G2.JPG	16/9/2019	3LC		108.472	15.932
CLC	Hon Mo	HM_O7_P3_G1.JPG	16/9/2019	4LC		108.472	15.9319
CLC	Hon Dai	HD_18_P4_G5.JPG	17/9/2019	4LC	5.1	108.484	15.9442
CLC	Bai Bac	BB_O1_1_3_G512.JPG	14/9/2019	S		108.488	15.9629
CLC	Bai Bac	BB_O1_1_3_G514.JPG	15/9/2019	S		108.489	15.9629
CLC	Hon La	HLN_O3_2_2_G5.JPG	13/9/2019	2LC	4.4	108.444	15.9689
CLC	Bai Bac	BB_O2_2_2_G5.JPG	14/9/2019	S	2.2	108.488	15.9624
CLC	Hon Tai	HT_DR_16_G3.JPG	18/9/2019	2LC	4.5	108.532	15.9053
CLC	Bai Bac	BB_O4_2_1_G2.JPG	14/9/2019	HB	3.5	108.484	15.9641
CLC	Bai Ban	BN_DR_13_G3.JPG	19/9/2019	1LC	4.8	108.532	15.9247
CLC	Hon Mo	HM_O7_P2_G1.JPG	16/9/2019	4LC		108.472	15.9318
CLC	Hon Mo	HM_O2_P2_G5.JPG	16/9/2019	1LC	4.8	108.475	15.9335
CLC	Bai Chong-Bai Bim	BC_02_P3_G5.JPG	22/9/2019	1LC	4.8	108.509	15.9434
CLC	Hon Dai	HD_O4_P3_G5.JPG	17/9/2019	1LC	4.8	108.478	15.9466
CLC	Hon Dai	HD_O6_P3_G5.JPG	17/9/2019	1LC	4.8	108.482	15.9486
CLC	Hon Dai	HD_O6_P4_G5.JPG	17/9/2019	1LC	4.8	108.481	15.9486
CLC	Hon Mo	HM_O7_G_G5.JPG	16/9/2019	4LC	4.2	108.472	15.9318
CLC	Bai Ban	BN_DR_27_G2.JPG	20/9/2019	2LC	4.5	108.531	15.9256
CLC	Bai Ong	BO_O3_P1_G1.JPG	15/9/2019	2LC	4.5	108.495	15.9557
CLC	Bai Bac	BB_21_P1_G5.JPG	15/9/2019	2LC	4.5	108.49	15.9597
CLC	Bai Bac	BB_O2_2_3_G2.JPG	14/9/2019	S	1.8	108.488	15.9625
CLC	Hon La	HLD_O1_P3_G5.JPG	13/9/2019	2LC	4.5	108.446	15.9762
CLC	Hon Mo	HM_O6_P3_G5.JPG	16/9/2019	4LC	6	108.476	15.9312
CLC	Bai Bac	BB_O2_3_1_G5.JPG	14/9/2019	S	3.1	108.488	15.9624
CLC	Bai Bac	BB_O3_3_9_G5.JPG	14/9/2019	S		108.488	15.9621
CLC	Hon Mo	HM_O6_P3_G3.JPG	16/9/2019	4LC		108.476	15.9312
CLC	Bai Bac	BB_O4_2_10_G4.JPG	14/9/2019	HB	10.1	108.484	15.964
CLC	Bai Bac	BB_O7_2_3_G2.JPG	14/9/2019	S		108.486	15.962
CLC	Bai Bac	BB_O4_3_2_G3.JPG	14/9/2019	HB		108.484	15.9641
CLC	Hon Mo	HM_O6_P3_G2.JPG	16/9/2019	4LC		108.476	15.9312
CLC	Hon Mo	HM_O6_P2_G5.JPG	16/9/2019	3LC	6.3	108.476	15.9313
CLC	Hon Mo	HM_O6_P2_G3.JPG	16/9/2019	3LC		108.476	15.9313
CLC	Hon Mo	HM_O6_P2_G2.JPG	16/9/2019	4LC		108.476	15.9313
CLC	Hon Mo	HM_O6_P1_G1.JPG	16/9/2019	3LC		108.476	15.9313
CLC	Hon Mo	HM_O6_G_G5.JPG	16/9/2019	3LC	4.9	108.476	15.9313
CLC	Hon La	HLD_O1_P3_G5.JPG	13/9/2019	2LC	4.5	108.446	15.9762
CLC	Bai Ban	BN_O2_P4_G5.JPG	19/9/2019	2LC	4.6	108.533	15.9241
CLC	Hon Mo	HM_O6_G_G2.JPG	16/9/2019	3LC		108.476	15.9313
CLC	Hon Mo	HM_O6_G_G1.JPG	16/9/2019	3LC		108.476	15.9313
CLC	Hon Mo	HM_O5_P3_G2.JPG	16/9/2019	3LC		108.476	15.9315
CLC	Hon Mo	HM_O5_G_G3.JPG	16/9/2019	3LC		108.476	15.9315
CLC	Hon Mo	HM_O4_P3_G5.JPG	16/9/2019	4LC		108.477	15.9317
CLC	Bai Ong	BO_12_P1_G1.JPG	15/9/2019	2LC	4.6	108.497	15.9568
CLC	Hon Mo	HM_O4_P1_G5.JPG	16/9/2019	3LC		108.477	15.932
CLC	Bai Bac	BB_O7_2_3_G5.JPG	14/9/2019	S	6.8	108.486	15.962
CLC	Hon Mo	HM_O4_P1_G2.JPG	16/9/2019	3LC		108.477	15.932
CLC	Hon Mo	HM_O4_P1_G1.JPG	16/9/2019	3LC		108.477	15.932
CLC	Hon Mo	HM_O4_G_G5.JPG	16/9/2019	3LC		108.477	15.932
CLC	Hon Mo	HM_O4_G_G3.JPG	16/9/2019	3LC		108.477	15.932
CLC	Hon La	HLN_O1_2_6_G5.JPG	13/9/2019	2LC	4.6	108.443	15.9705
CLC	Bai Huong	BH_DR_21_G5.JPG	20/9/2019	1LC	5	108.53	15.9288
CLC	Hon Mo	HM_O8_P2_G5.JPG	16/9/2019	1LC	5.1	108.472	15.9313
CLC	Bai Bac	BB_O7_2_4_G4.JPG	14/9/2019	S		108.486	15.9619
CLC	Hon Tai	HT_O6_P2_G22.JPG	18/9/2019	4LC		108.532	15.9038
CLC	Hon Tai	HT_DR_33_G5.JPG	18/9/2019	1LC	5.2	108.533	15.9081
CLC	Hon Tai	HT_O6_P2_G21.JPG	18/9/2019	4LC		108.532	15.9038
CLC	Bai Bac	BB_O4_3_3_G1.JPG	14/9/2019	HB		108.484	15.9641
CLC	Bai Bac	BB_O4_3_3_G2.JPG	14/9/2019	HB		108.484	15.9642
CLC	Bai Bac	BB_O4_3_3_G3.JPG	14/9/2019	HB		108.484	15.9642
CLC	Bai Bac	BB_O4_3_3_G4.JPG	14/9/2019	HB		108.484	15.9641
CLC	Bai Bac	BB_O4_3_3_G5.JPG	14/9/2019	HB	6.7	108.484	15.9642
CLC	Bai Bac	BB_O7_2_4_G5.JPG	14/9/2019	S	6.5	108.486	15.9619
CLC	SunGroup	BBi_05_P1_G5.JPG	21/9/2019	3LC	0.8	108.52	15.9367
CLC	Bai Chong-Bai Bim	BBi_DR_1_G21.JPG	21/9/2019	S		108.517	15.9384
CLC	Hon Dai	HD_12_P4_G4.JPG	17/9/2019	4LC		108.485	15.9461
CLC	Bai Bac	BB_O5_1_1_G5.JPG	14/9/2019	HB	1.7	108.485	15.9634
CLC	SunGroup	BBi_05_P2_G5.JPG	21/9/2019	3LC	0.8	108.52	15.9366
CLC	Bai Bac	BB_O5_1_10_G2.JPG	14/9/2019	HB	2.3	108.485	15.9636
CLC	Bai Chong-Bai Bim	BBi_DR_1_G22.JPG	21/9/2019	S		108.517	15.9384
CLC	Bai Chong-Bai Bim	BBi_DR_1_G23.JPG	21/9/2019	S		108.517	15.9385
CLC	SunGroup	BBi_05_P3_G5.JPG	21/9/2019	S	1.1	108.52	15.9365
CLC	SunGroup	BBi_05_P3_G5.JPG	21/9/2019	3LC	1.1	108.52	15.9365
CLC	Hon Dai	HD_13_P2_G1.JPG	17/9/2019	4LC		108.484	15.9459
CLC	Bai Chong-Bai Bim	BBi_DR_1_G24.JPG	21/9/2019	S		108.517	15.9384
CLC	Hon Tai	HT_O6_P2_G2.JPG	18/9/2019	4LC		108.532	15.9038
CLC	SunGroup	BBi_05_P4_G5.JPG	21/9/2019	3LC	1	108.52	15.9366
CLC	SunGroup	BBi_05_P5_G5.JPG	21/9/2019	3LC	0.9	108.52	15.9366
CLC	SunGroup	BBi_DR_25.JPG	21/9/2019	3LC	1.2	108.52	15.937
CLC	SunGroup	BBi_DR_250.JPG	21/9/2019	3LC		108.52	15.937
CLC	SunGroup	BBi_DR_251.JPG	21/9/2019	3LC		108.52	15.9369
CLC			16/9/2019	D	18.5	108.47	15.9327
CLC	SunGroup	BBi_DR_252.JPG	21/9/2019	3LC		108.52	15.937
CLC	Bai Chong-Bai Bim	BBi_DR_1_G2.JPG	21/9/2019	S		108.517	15.9385
CLC	Bai Bac	BB_O6_1_1_G5.JPG	14/9/2019	HB	3.3	108.485	15.9628
CLC	SunGroup	BBi_DR_26.JPG	21/9/2019	3LC	1.1	108.52	15.937
CLC	Bai Bac	BB_O9_G_G51.JPG	15/9/2019	HB		108.489	15.9624
CLC	Bai Chong-Bai Bim	BBi_O1_P4_G5.JPG	21/9/2019	S	2.2	108.517	15.9387
CLC	Bai Huong	BH_DR_14_G5.JPG	20/9/2019	1LC	5.2	108.53	15.928
CLC	Bai Bac	BB_O9_G_G52.JPG	15/9/2019	HB		108.489	15.9624
CLC	Hon Dai	HD_O3_G_G5.JPG	17/9/2019	1LC	5.2	108.478	15.946
CLC	Bai Bac	BB_O9_G_G53.JPG	15/9/2019	HB		108.489	15.9623
CLC	Bai Bac	BB_O9_G_G54.JPG	15/9/2019	HB		108.489	15.9624
CLC	Hon Dai	HD_DR_31_G5.JPG	17/9/2019	1LC	5.2	108.483	15.9487
CLC	Bai Huong	BH_DR_13_G2.JPG	20/9/2019	S		108.53	15.9278
CLC	Bai Ban	BN_DR_16_G5.JPG	19/9/2019	1LC	5.3	108.532	15.925
CLC	Bai Ban	BN_DR_22_G2.JPG	19/9/2019	S	5.3	108.532	15.9251
CLC	Hon Dai	HD_O3_P4_G5.JPG	17/9/2019	1LC	5.3	108.478	15.9461
CLC	Hon Mo	HM_O1_P1_G2.JPG	16/9/2019	2LC	4.7	108.474	15.9338
CLC	Hon La	HLN_O2_P3_G5.JPG	13/9/2019	2LC	4.7	108.444	15.97
CLC	Hon Dai	HD_O7_G_G5.JPG	17/9/2019	1LC	5.3	108.482	15.9485
CLC	Hon Tai	HT_15_P1_G5.JPG	18/9/2019	1LC	5.6	108.534	15.909
CLC	Bai Bac	BB_N13_DR_13_G5.JPG	14/9/2019	1LC	5.7	108.486	15.9623
CLC	Hon Dai	HD_DR_4_G2.JPG	17/9/2019	1LC	5.8	108.478	15.9451
CLC	Hon Mo	HM_O2_P1_G2.JPG	16/9/2019	HB	2.7	108.475	15.9334
CLC	Hon Dai	HD_DR_4_G2.JPG	17/9/2019	1LC	5.8	108.478	15.9451
CLC	Hon Dai	HD_O2_P3_G5.JPG	17/9/2019	4LC	4.9	108.478	15.9454
CLC	Hon Dai	HD_DR_4_G2.JPG	17/9/2019	1LC	5.8	108.478	15.9451
CLC	Hon La	HLN_DR_1_G5.JPG	13/9/2019	2LC	4.7	108.443	15.9707
CLC	Bai Huong	BH_DR_6_G5.JPG	20/9/2019	2LC	4.8	108.53	15.9269
CLC	Hon Dai	HD_11_P3_G2.JPG	17/9/2019	4LC		108.485	15.9464
CLC	Hon Dai	HD_DR_77_G5.JPG	17/9/2019	2LC	4.8	108.481	15.9391
CLC	Bai Lang -Bai Xep	BX_DR_15_G5.JPG	22/9/2019	2LC	4.8	108.508	15.9518
CLC	Bai Bac	BB_O9_G_G5.JPG	15/9/2019	HB		108.49	15.9624
CLC	Hon La	HLN_O1_3_8_G5.JPG	13/9/2019	2LC	4.8	108.443	15.9705
CLC	Hon Kho	HKM_O2_2_1_G5.JPG	12/9/2019	2LC	4.8	108.421	15.9722
CLC	Hon Dai	HD_DR_24_G2.JPG	17/9/2019	1LC	5.8	108.481	15.9488
CLC	Bai Lang -Bai Xep	BX_DR_51_G4.JPG	22/9/2019	1LC	6.2	108.508	15.9467
CLC	Hon Dai	HD_DR_19_G5.JPG	17/9/2019	1LC	6.2	108.48	15.9481
CLC	Hon Dai	HD_DR_11_G5.JPG	17/9/2019	1LC	6.4	108.478	15.9464
CLC	Bai Lang -Bai Xep	BX_DR_31_G5.JPG	22/9/2019	1LC	6.4	108.508	15.9491
CLC	Hon Dai	HD_23_G_G5.JPG	17/9/2019	4LC	5.6	108.482	15.9407
CLC	Bai Ban	BN_DR_25_G4.JPG	19/9/2019	S	5.1	108.532	15.9253
CLC	Hon Mo	HM_DR_8_G3.JPG	16/9/2019	HB	4.3	108.471	15.9324
CLC	Hon Mo	HM_DR_4_G1.JPG	16/9/2019	3LC		108.477	15.9318
CLC	Hon Mo	HM_DR_3_G4.JPG	16/9/2019	HB		108.476	15.9332
CLC	Bai Huong	BH_DR_19_G5.JPG	20/9/2019	1LC	6.6	108.53	15.9285
CLC	Hon Dai	HD_O7_P4_G5.JPG	17/9/2019	1LC	6.7	108.482	15.9485
CLC	Hon La	HLD_O2_G_G5.JPG	13/9/2019	1LC	6.8	108.445	15.9756
CLC	Hon Tai	HT_DR_40_G5.JPG	18/9/2019	1LC	7.3	108.534	15.9085
CLC	Hon Tai	HT_DR_32_G5.JPG	18/9/2019	1LC	7.4	108.533	15.9081
CLC	Hon Tai	HT_DR_22_G2.JPG	18/9/2019	1LC	7.9	108.532	15.906
CLC	Hon Dai	HD_19_G_G5.JPG	17/9/2019	4LC	5.5	108.484	15.9437
CLC	Bai Ban	BN_DR_29_G5.JPG	20/9/2019	S	5.2	108.531	15.9254
CLC			21/9/2019	D	15	108.519	15.9345
CLC			16/9/2019	D	22	108.475	15.9345
CLC	Hon Tai	HT_O6_P2_G2.JPG	18/9/2019	4LC		108.532	15.9038
CLC	Hon Dai	HD_11_P2_G4.JPG	17/9/2019	4LC		108.485	15.9464
CLC			16/9/2019	D	19	108.471	15.9345
CLC	Hon Tai	HT_O6_P3_G2.JPG	18/9/2019	S		108.532	15.9053
CLC	Bai Ban	BN_O7_P4_G5.JPG	19/9/2019	S	3.4	108.532	15.9253
CLC	Bai Chong-Bai Bim	BBi_O3_P2_G3.JPG	21/9/2019	HB	1.2	108.517	15.9387
CLC	Bai Ong	BO_DR_02_G3.JPG	15/9/2019	S		108.494	15.9555
CLC	Bai Ban	BN_O2_P4_G2.JPG	19/9/2019	2LC	4.9	108.533	15.9241
CLC	Hon Dai	HD_23_P3_G1.JPG	17/9/2019	4LC		108.482	15.9406
CLC	Hon Tai	HT_01_P1_G5.JPG	18/9/2019	2LC	5	108.54	15.9033
CLC	Hon Tai	HT_O7_P4_G4.JPG	18/9/2019	2LC	5	108.532	15.9055
CLC	Bai Ong	BO_O1_P4_G5.JPG	15/9/2019	S		108.495	15.9557
CLC			16/9/2019	D		108.475	15.9348
CLC	Bai Bac	BB_O6_3_1_G5.JPG	14/9/2019	2LC	5	108.485	15.9627
CLC	Hon Tai	HT_O7_P1_G5.JPG	18/9/2019	2LC	5.2	108.532	15.9054
CLC			16/9/2019	D		108.472	15.9348
CLC	Hon Dai	HD_23_P1_G5.JPG	17/9/2019	2LC	5.2	108.482	15.9407
CLC	Bai Ong	BO_O7_P3_G1.JPG	15/9/2019	S		108.496	15.9558
CLC	Hon Kho	HKC_O2_2_3_G5.JPG	12/9/2019	2LC	5.2	108.418	15.9731
CLC	Bai Huong	BH_09_P1.JPG	20/9/2019	HB	1.3	108.528	15.9313
CLC	Bai Bac	BB_N13_DR_7_G2.JPG	14/9/2019	2LC	5.4	108.485	15.9631
CLC	Bai Huong	BH_09_P2.JPG	20/9/2019	HB	1	108.528	15.9313
CLC			16/9/2019	D		108.475	15.9349
CLC	Hon Dai	HD_21_P1_G3.JPG	17/9/2019	4LC		108.483	15.9429
CLC	Bai Ong	BO_O7_P3_G2.JPG	15/9/2019	S		108.496	15.9559
CLC	Bai Ong	BO_O7_P3_G3.JPG	15/9/2019	S		108.496	15.9559
CLC			16/9/2019	D		108.472	15.9349
CLC			16/9/2019	D		108.471	15.9349
CLC			16/9/2019	D		108.472	15.9349
CLC	Hon Dai	HD_23_P2_G5.JPG	17/9/2019	4LC	5.5	108.482	15.9407
CLC	Hon Dai	HD_19_P3_G1.JPG	17/9/2019	4LC		108.484	15.9437
CLC	Bai Ong	BO_O7_P3_G51.JPG	15/9/2019	S		108.496	15.9559
CLC	Bai Huong	BH_09_P3_G5.JPG	20/9/2019	HB	0.7	108.528	15.9314
CLC	SunGroup	BBi_DR_31_G2.JPG	21/9/2019	4LC		108.52	15.9364
CLC	Bai Ong	BO_O7_P3_G5.JPG	15/9/2019	S	7.2	108.496	15.9559
CLC	Bai Ong	BO_O8_P4_G2.JPG	15/9/2019	S		108.496	15.9561
CLC	Hon La	HLN_DR_7_G5.JPG	13/9/2019	1LC	7.9	108.444	15.9687
CLC	Bai Huong	BH_09_P4.JPG	20/9/2019	HB	1.1	108.528	15.9314
CLC	Bai Huong	BH_09_P5.JPG	20/9/2019	HB	0.8	108.528	15.9314
CLC	SunGroup	Camera 360	21/9/2019	S		108.521	15.9352
CLC	SunGroup	Camera 360	21/9/2019	S		108.521	15.9355
CLC	SunGroup	Camera 360	21/9/2019	S		108.521	15.9355
CLC	Bai Huong	BH_DR_40_G5.JPG	20/9/2019	HB	0.8	108.528	15.9316
CLC	SunGroup	Camera 360	21/9/2019	S		108.52	15.9354
CLC	SunGroup	Camera 360	21/9/2019	S		108.52	15.9355
CLC	SunGroup	Camera 360	21/9/2019	S		108.521	15.9355
CLC	SunGroup	Camera 360	21/9/2019	S		108.52	15.9366
CLC	SunGroup	Camera 360	21/9/2019	S		108.521	15.9356
CLC			21/9/2019	D	14	108.517	15.9369
CLC	SunGroup	Camera 360	21/9/2019	S		108.521	15.9366
CLC	SunGroup	Camera 360	21/9/2019	S		108.521	15.9356
CLC	Hon Dai	HD_19_P2_G5.JPG	17/9/2019	4LC		108.484	15.9437
CLC	Hon Dai	HD_19_P2_G1.JPG	17/9/2019	4LC	4.5	108.484	15.9437
CLC	Bai Ban	BN_DR_14_G5.JPG	19/9/2019	HB		108.533	15.9251
CLC	Bai Ban	Camera 360	19/9/2019	HB		108.533	15.9249
CLC	Bai Lang -Bai Xep	BX_DR_16_G53.JPG	22/9/2019	S	4.8	108.508	15.9518
CLC	Bai Lang -Bai Xep	BX_DR_23_G54.JPG	22/9/2019	S	5.1	108.508	15.9501
CLC	Bai Lang -Bai Xep	BX_DR_25_G55.JPG	22/9/2019	S	5.3	108.508	15.95
CLC	Hon Dai	HD_19_P4_G5.JPG	17/9/2019	4LC	6.7	108.484	15.9437
CLC	Hon Dai	HD_DR_22_G1.JPG	17/9/2019	1LC	8.2	108.48	15.9489
CLC	Hon Dai	HD_18_P3_G4.JPG	17/9/2019	4LC		108.484	15.9441
CLC	Bai Lang -Bai Xep	BX_DR_34_G3.JPG	22/9/2019	S		108.508	15.9479
CLC	Bai Lang -Bai Xep	BX_DR_34_G4.JPG	22/9/2019	S		108.508	15.9479
CLC	Bai Lang -Bai Xep	BX_DR_34_G5.JPG	22/9/2019	S	5.2	108.508	15.9479
CLC	Hon Dai	HD_10_G_G5.JPG	17/9/2019	S	3	108.485	15.9466
CLC	Hon Dai	HD_10_P4_G5.JPG	17/9/2019	S	3.2	108.485	15.9466
CLC	Hon Dai	HD_11_G_G1.JPG	17/9/2019	S		108.485	15.9464
CLC	Hon Dai	HD_11_P4_G2.JPG	17/9/2019	S		108.485	15.9464
CLC	Bai Bac	BB_N13_DR_8_G5.JPG	14/9/2019	1LC	8.6	108.485	15.9629
CLC	Bai Ban	Camera 360	19/9/2019	HB		108.533	15.9251
CLC	Bai Ban	Camera 360	19/9/2019	HB		108.533	15.9248
CLC	Hon La	HLN_DR_3_G5.JPG	13/9/2019	1LC	8.9	108.443	15.9702
CLC	Hon La	HLD_O2_P2_G3.JPG	13/9/2019	1LC	9	108.445	15.9755
CLC	Hon Dai	HD_11_P4_G5.JPG	17/9/2019	S	2.9	108.485	15.9464
CLC	Hon Dai	HD_DR_2_G5.JPG	17/9/2019	1LC	9.3	108.477	15.945
CLC	Hon Mo	HM_DR_2_G4.JPG	16/9/2019	1LC	9.5	108.475	15.9334
CLC	Hon Kho	HKC_DR_20	12/9/2019	1LC	9.5	108.418	15.9723
CLC	Hon Dai	HD_12_P1_G5.JPG	17/9/2019	S	6.1	108.485	15.9461
CLC	Hon Tai	HT_DR_47_G5.JPG	18/9/2019	1LC	11.5	108.534	15.9093
CLC	Hon Tai	HT_10_P1_G5.JPG	18/9/2019	1LC		108.533	15.908
CLC	Hon Dai	HD_12_P2_G1.JPG	17/9/2019	S		108.485	15.946
CLC	Hon Tai	HT_10_P2_G11.JPG	18/9/2019	1LC		108.533	15.9079
CLC	Hon Kho	HKM_O2_3_1_G5.JPG	12/9/2019	2LC	5.5	108.421	15.9723
CLC	Hon Dai	HD_DR_48_G5.JPG	17/9/2019	2LC	5.6	108.484	15.9445
CLC	Hon Tai	HT_10_P2_G1.JPG	18/9/2019	1LC		108.533	15.9079
CLC	Bai Ong	BO_O3_G_G2.JPG	15/9/2019	2LC	5.6	108.495	15.9556
CLC	Hon La	HLN_O2_G_G1.JPG	13/9/2019	2LC	5.6	108.444	15.97
CLC	Hon Tai	HT_DR_4_G5.JPG	18/9/2019	2LC	5.8	108.54	15.9034
CLC	Bai Ban	BN_DR_21_G5.JPG	19/9/2019	HB	3.2	108.532	15.9254
CLC	Hon Dai	HD_DR_69_G3.JPG	17/9/2019	4LC	4.3	108.482	15.941
CLC	Hon Mo	HM_O7_P2_G5.JPG	16/9/2019	2LC	5.9	108.472	15.9319
CLC	Hon Tai	HT_10_P2_G2.JPG	18/9/2019	1LC		108.533	15.908
CLC	Bai Huong	BH_DR_5_G5.JPG	20/9/2019	2LC	6.1	108.53	15.9269
CLC	Hon Tai	HT_10_P2_G3.JPG	18/9/2019	1LC		108.533	15.908
CLC	Hon Mo	HM_O1_P4_G5.JPG	16/9/2019	2LC	6.2	108.474	15.9336
CLC	Bai Lang -Bai Xep	BX_O9_P2_G5.JPG	22/9/2019	2LC	6.2	108.508	15.9457
CLC	Hon Tai	HT_10_P2_G5.JPG	18/9/2019	1LC		108.533	15.9079
CLC	Hon Dai	HD_DR_62_G3.JPG	17/9/2019	4LC		108.483	15.942
CLC	Bai Huong	BH_DR_12_G5.JPG	20/9/2019	2LC	6.3	108.53	15.9276
CLC	Hon Dai	HD_O9_G_G5.JPG	17/9/2019	2LC	6.3	108.482	15.9487
CLC	Hon Tai	HT_10_P3_G1.JPG	18/9/2019	1LC		108.533	15.908
CLC	Hon Tai	HT_10_P3_G2.JPG	18/9/2019	1LC		108.533	15.908
CLC	Hon Kho	HKM_O2_3_3_G1.JPG	12/9/2019	2LC	6.4	108.421	15.9722
CLC	Bai Ban	BN_DR_26_G2.JPG	19/9/2019	HB		108.532	15.9253
CLC	Hon La	HLN_DR_4_G5.JPG	13/9/2019	2LC	6.7	108.444	15.9696
CLC	Hon Tai	HT_DR_1_G5.JPG	18/9/2019	2LC	6.8	108.54	15.9032
CLC	Bai Ban	BN_DR_7_G5.JPG	19/9/2019	HB		108.533	15.9242
CLC	Hon Tai	HT_10_P3_G3.JPG	18/9/2019	1LC		108.533	15.908
CLC	Hon Tai	HT_10_P3_G4.JPG	18/9/2019	1LC		108.533	15.908
CLC	Hon Tai	HT_DR_18_G2.JPG	18/9/2019	2LC	6.9	108.532	15.9056
CLC	Hon Tai	HT_10_P4_G1.JPG	18/9/2019	1LC		108.533	15.908
CLC	Hon Tai	HT_10_P4_G2.JPG	18/9/2019	1LC		108.533	15.908
CLC	Hon Dai	HD_DR_10_G5.JPG	17/9/2019	2LC	7.2	108.478	15.9457
CLC	Bai Ong	BO_10_P1_G4.JPG	15/9/2019	HB		108.496	15.9562
CLC	Hon Tai	HT_DR_2_G5.JPG	18/9/2019	2LC	7.3	108.54	15.9032
CLC	Hon Dai	HD_DR_45_G1.JPG	17/9/2019	2LC	7.3	108.485	15.9451
CLC	Hon Mo	HM_DR_1_G5.JPG	16/9/2019	2LC	7.4	108.475	15.9335
CLC	Hon Tai	HT_10_P4_G3.JPG	18/9/2019	1LC		108.533	15.9081
CLC	Bai Ong	BO_11_P3_G5.JPG	15/9/2019	HB	1.6	108.496	15.9566
CLC	Hon Tai	HT_10_P4_G4.JPG	18/9/2019	1LC		108.533	15.908
CLC	Hon Tai	HT_10_P4_G5.JPG	18/9/2019	1LC		108.533	15.908
CLC	Bai Ong	BO_11_P4_G5.JPG	15/9/2019	HB	1.7	108.496	15.9566
CLC	Hon Dai	HD_20_P4_G4.JPG	17/9/2019	4LC		108.484	15.9433
CLC	Hon Dai	HD_DR_81_G5.JPG	17/9/2019	2LC	7.5	108.481	15.9384
CLC	Hon Dai	HD_O9_P4_G5.JPG	17/9/2019	2LC	7.5	108.483	15.9489
CLC	Hon Dai	HD_DR_3_G5.JPG	17/9/2019	2LC	7.6	108.478	15.9451
CLC	Hon Tai	HT_DR_27_G5.JPG	18/9/2019	2LC	7.9	108.532	15.9063
CLC	Hon Dai		17/9/2019	D	18.5	108.482	15.9384
CLC			16/9/2019	D		108.476	15.9385
CLC	Hon dai		16/9/2019	D		108.476	15.9385
CLC	Hon Dai	HD_DR_80_G4.JPG	17/9/2019	3LC		108.481	15.9386
CLC	Hon Dai	HD_DR_80_G13.JPG	17/9/2019	3LC		108.481	15.9386
CLC	Hon Dai	HD_DR_80_G5.JPG	17/9/2019	3LC	5.2	108.481	15.9386
CLC	Hon Dai	HD_DR_80_G3.JPG	17/9/2019	3LC		108.481	15.9386
CLC	Hon Dai	HD_DR_80_G2.JPG	17/9/2019	3LC		108.481	15.9386
CLC	Hon Dai	HD_DR_79_G1.JPG	17/9/2019	3LC		108.481	15.9386
CLC	Hon Dai	HD_DR_79_G4.JPG	17/9/2019	3LC		108.481	15.9386
CLC	Hon dai		16/9/2019	D	25	108.476	15.9386
CLC	Hon Dai	HD_DR_79_G51.JPG	17/9/2019	3LC		108.481	15.9387
CLC	Bai Ong	BO_13_P2_G1.JPG	15/9/2019	HB		108.496	15.957
CLC	Hon dai		16/9/2019	D		108.476	15.9386
CLC	Hon Dai	HD_DR_79_G52.JPG	17/9/2019	3LC		108.481	15.9387
CLC	Hon Dai	HD_DR_79_G5.JPG	17/9/2019	3LC	8.9	108.481	15.9387
CLC			16/9/2019	D		108.476	15.9387
CLC			16/9/2019	D		108.476	15.9388
CLC	Hon Dai	HD_DR_78_G1.JPG	17/9/2019	3LC		108.481	15.9389
CLC	Hon Dai	HD_DR_78_G4.JPG	17/9/2019	3LC		108.481	15.9389
CLC	Hon Dai	HD_DR_78_G5.JPG	17/9/2019	3LC	7.2	108.481	15.9389
CLC	Hon Dai	HD_DR_78_G2.JPG	17/9/2019	3LC		108.481	15.9389
CLC	Hon Dai	HD_DR_78_G3.JPG	17/9/2019	3LC		108.481	15.9389
CLC	Hon Dai	HD_DR_8_G5.JPG	17/9/2019	2LC	7.9	108.478	15.9455
CLC	Hon Dai	HD_DR_27_G5.JPG	17/9/2019	2LC	8.2	108.482	15.9487
CLC	Hon La	HLN_O2_P4_G5.JPG	13/9/2019	2LC	8.2	108.443	15.9698
CLC	Hon Dai	HD_DR_46_G5.JPG	17/9/2019	2LC	8.5	108.485	15.9449
CLC	Hon Dai	HD_DR_46_G5.JPG	17/9/2019	2LC	8.5	108.485	15.9449
CLC	Hon Dai	HD_12_P2_G2.JPG	17/9/2019	S		108.485	15.946
CLC	Bai Ong	BO_13_P2_G2.JPG	15/9/2019	HB		108.496	15.9571
CLC	Hon Dai	HD_22_P4_G1.JPG	17/9/2019	4LC		108.483	15.9415
CLC	Hon Dai	HD_18_P3_G2.JPG	17/9/2019	4LC		108.484	15.9441
CLC	Hon Dai	HD_12_P2_G3.JPG	17/9/2019	S		108.485	15.946
CLC	Hon Dai		17/9/2019	D	19.5	108.483	15.9394
CLC	Hon Dai	HD_12_P2_G4.JPG	17/9/2019	S		108.485	15.946
CLC	Hon Dai	HD_12_P2_G5.JPG	17/9/2019	S	5.6	108.485	15.946
CLC	Hon Mo	HM_DR_17_G1.JPG	16/9/2019	4LC		108.474	15.9308
CLC	Hon Dai	HD_13_P2_G2.JPG	17/9/2019	S		108.484	15.946
CLC	Hon Dai	HD_DR_75_G3.JPG	17/9/2019	3LC		108.482	15.9395
CLC	Hon Dai	HD_24_P1_G3.JPG	17/9/2019	4LC	5.2	108.482	15.9397
CLC	Bai Ong	BO_13_P2_G51.JPG	15/9/2019	HB		108.496	15.9571
CLC	Bai Ong	BO_13_P2_G52.JPG	15/9/2019	HB		108.496	15.9571
CLC	Hon Dai	HD_13_P2_G3.JPG	17/9/2019	S		108.484	15.946
CLC	Hon Dai	HD_13_P2_G5.JPG	17/9/2019	S	3.3	108.484	15.946
CLC	Bai Ong	BO_13_P2_G53.JPG	15/9/2019	HB	3.2	108.496	15.957
CLC	Bai Ong	BO_DR_73_G3.JPG	15/9/2019	HB		108.497	15.957
CLC	Hon Dai	HD_13_P3_G2.JPG	17/9/2019	S		108.484	15.9459
CLC	Hon Dai	HD_23_G_G4.JPG	17/9/2019	4LC		108.482	15.9407
CLC	Hon Dai	HD_19_P4_G4.JPG	17/9/2019	4LC		108.484	15.9436
CLC	Hon Dai	HD_13_P4_G5.JPG	17/9/2019	S		108.484	15.9459
CLC	Hon Dai	HD_18_G_G3.JPG	17/9/2019	S		108.484	15.9441
CLC	Bai Ong	BO_O1_P2_G5.JPG	15/9/2019	HB	1.5	108.495	15.9559
CLC	Hon Dai	HD_18_G_G4.JPG	17/9/2019	S		108.484	15.9441
CLC	Hon Dai	HD_18_G_G5.JPG	17/9/2019	S	4.1	108.484	15.9441
CLC	Bai Lang -Bai Xep	BX_O1_P2_G2.JPG	22/9/2019	HB	2	108.507	15.9532
CLC	Hon Dai	HD_18_P2_G1.JPG	17/9/2019	S		108.484	15.9441
CLC	Hon Dai	HD_18_P2_G4.JPG	17/9/2019	S		108.484	15.9441
CLC	Hon Dai	HD_18_P2_G5.JPG	17/9/2019	S		108.484	15.9441
CLC	Hon Dai	HD_19_P2_G3.JPG	17/9/2019	S		108.484	15.9438
CLC	Hon Dai	HD_DR_73_G5.JPG	17/9/2019	3LC	8.7	108.482	15.9399
CLC	Hon Dai	HD_DR_73_G3.JPG	17/9/2019	3LC		108.482	15.9399
CLC	Hon Dai	HD_DR_72_G1.JPG	17/9/2019	3LC		108.482	15.9402
CLC	Hon Dai	HD_DR_72_G4.JPG	17/9/2019	3LC		108.482	15.9402
CLC	Hon Dai	HD_DR_72_G5.JPG	17/9/2019	3LC	8.2	108.482	15.9402
CLC	Hon Dai	HD_DR_72_G2.JPG	17/9/2019	3LC		108.482	15.9402
CLC	Hon Dai	HD_DR_72_G3.JPG	17/9/2019	3LC		108.482	15.9403
CLC	Hon Dai	HD_DR_52_G51.JPG	17/9/2019	2LC	8.9	108.484	15.9439
CLC	Hon Dai	HD_22_P3_G5.JPG	17/9/2019	S		108.483	15.9415
CLC	Bai Chong-Bai Bim		21/9/2019	D	14.5	108.51	15.9409
CLC	Hon Dai	HD_22_P4_G2.JPG	17/9/2019	4LC		108.483	15.9416
CLC	Hon Dai	HD_DR_70_G1.JPG	17/9/2019	3LC		108.483	15.9406
CLC	Bai Lang -Bai Xep	BX_O9_G_G5.JPG	22/9/2019	HB	2.4	108.508	15.9455
CLC	Hon Dai	HD_24_P1_G5.JPG	17/9/2019	S		108.482	15.9397
CLC	Hon Dai	HD_24_P2_G1.JPG	17/9/2019	S		108.482	15.9397
CLC	Hon La	HLN_DR_9_G5.JPG	13/9/2019	2LC	9.2	108.445	15.9683
CLC	Hon Kho	HKC_DR_06_G1.JPG	12/9/2019	2LC	9.3	108.417	15.972
CLC	Hon Dai	HD_DR_9_G5.JPG	17/9/2019	2LC	9.9	108.478	15.9457
CLC	Hon Tai	HT_01_P1_G1.JPG	18/9/2019	2LC		108.54	15.9032
CLC	Hon Dai	HD_24_P3_G1.JPG	17/9/2019	S		108.482	15.9397
CLC	Hon Mo	HM_DR_16_G5.JPG	16/9/2019	4LC	5.8	108.473	15.9307
CLC	Hon Dai	HD_23_P3_G1.JPG	17/9/2019	4LC		108.482	15.9406
CLC	Hon Tai	HT_11_P3_G5.JPG	18/9/2019	1LC		108.534	15.908
CLC	Hon Tai	HT_DR_1_G3.JPG	18/9/2019	2LC		108.54	15.9032
CLC	Hon Dai	HD_23_P3_G5.JPG	17/9/2019	4LC	5.7	108.482	15.9406
CLC	Hon Tai	HT_DR_10_G3.JPG	18/9/2019	2LC		108.54	15.9033
CLC	Hon Dai	HD_10_P3_G5.JPG	17/9/2019	HB	3.2	108.485	15.9465
CLC	Hon Tai	HT_DR_10_G4.JPG	18/9/2019	2LC		108.54	15.9032
CLC	Hon Tai	HT_DR_11_G1.JPG	18/9/2019	2LC		108.54	15.9032
CLC	Hon Tai	HT_DR_11_G2.JPG	18/9/2019	2LC		108.54	15.9032
CLC	Hon Tai	HT_DR_11_G3.JPG	18/9/2019	2LC		108.539	15.9032
CLC	Hon Tai	HT_DR_11_G4.JPG	18/9/2019	2LC		108.54	15.9032
CLC	Hon Tai	HT_DR_12_G4.JPG	18/9/2019	2LC		108.539	15.9032
CLC	Hon Dai	HD_24_P4_G2.JPG	17/9/2019	4LC		108.482	15.9397
CLC	Hon Dai	HD_24_P1_G1.JPG	17/9/2019	4LC		108.482	15.9397
CLC	Hon Dai	HD_DR_71_G3.JPG	17/9/2019	4LC		108.482	15.9404
CLC	Hon Dai	HD_22_P4_G3.JPG	17/9/2019	4LC		108.483	15.9415
CLC	Hon Dai	HD_O2_P4_G2.JPG	17/9/2019	4LC		108.478	15.9454
CLC	Hon Dai	HD_12_P4_G1.JPG	17/9/2019	4LC		108.485	15.9461
CLC	Hon Dai	HD_11_P2_G2.JPG	17/9/2019	HB		108.485	15.9464
CLC	Hon Dai	HD_24_P3_G2.JPG	17/9/2019	S		108.482	15.9397
CLC	Hon Dai	HD_24_P1_G2.JPG	17/9/2019	4LC		108.482	15.9398
CLC	Hon Tai	HT_12_P4_G2.JPG	18/9/2019	1LC		108.534	15.9084
CLC	Hon Dai	HD_DR_69_G5.JPG	17/9/2019	4LC		108.482	15.9409
CLC	Hon Dai	HD_12_G_G1.JPG	17/9/2019	HB		108.485	15.9461
CLC			16/9/2019	D		108.475	15.9409
CLC	Hon Dai	HD_24_P3_G5.JPG	17/9/2019	S		108.482	15.9397
CLC	Hon Dai	HD_DR_63_G1.JPG	17/9/2019	4LC		108.483	15.9419
CLC	Hon Dai	HD_12_P3_G1.JPG	17/9/2019	HB		108.485	15.9461
CLC	Hon Tai	HT_DR_16_G1.JPG	18/9/2019	2LC		108.532	15.9053
CLC	Hon Dai	HD_12_P3_G3.JPG	17/9/2019	HB		108.485	15.9461
CLC	Hon Dai	HD_24_P4_G3.JPG	17/9/2019	S		108.479	15.9379
CLC	Hon Dai	HD_12_P3_G4.JPG	17/9/2019	HB		108.485	15.9461
CLC	Hon dai		16/9/2019	D		108.475	15.941
CLC	Hon Dai	HD_O2_P4_G5.JPG	17/9/2019	4LC	4.1	108.478	15.9453
CLC	Hon Dai	HD_DR_66_G4.JPG	17/9/2019	3LC		108.483	15.9411
CLC	Hon Dai	HD_DR_66_G1.JPG	17/9/2019	3LC		108.483	15.9411
CLC	Hon Dai	HD_DR_25_G4.JPG	17/9/2019	S		108.482	15.9486
CLC	Hon dai		16/9/2019	D	26	108.475	15.941
CLC	Hon Tai	HT_12_P4_G5.JPG	18/9/2019	1LC		108.534	15.9083
CLC	Hon Tai	HT_12_P5_G2.JPG	18/9/2019	1LC		108.534	15.9083
CLC	Hon Dai	HD_DR_66_G5.JPG	17/9/2019	3LC	9.8	108.483	15.9411
CLC	Hon Dai	HD_DR_67_G5.JPG	17/9/2019	3LC	6.7	108.483	15.9411
CLC	Hon Dai	HD_DR_33_G1.JPG	17/9/2019	S		108.485	15.9467
CLC	Hon dai		16/9/2019	D		108.475	15.9411
CLC	Hon Tai	HT_14_G_G5.JPG	18/9/2019	1LC		108.534	15.9088
CLC	Hon Tai	HT_14_P4_G1.JPG	18/9/2019	1LC		108.534	15.9088
CLC	Hon Tai	HT_14_P4_G2.JPG	18/9/2019	1LC		108.534	15.9088
CLC	Hon Dai	HD_DR_67_G1.JPG	17/9/2019	3LC		108.483	15.9412
CLC	Hon Tai	HT_14_P4_G3.JPG	18/9/2019	1LC		108.534	15.9088
CLC			16/9/2019	D		108.475	15.9411
CLC	Hon Tai	HT_14_P4_G4.JPG	18/9/2019	1LC		108.534	15.9088
CLC			16/9/2019	D		108.475	15.9412
CLC	Hon dai		16/9/2019	D		108.475	15.9412
CLC	Hon Dai	HD_DR_33_G51.JPG	17/9/2019	S		108.485	15.9467
CLC	Hon dai		16/9/2019	D		108.475	15.9413
CLC	Hon Mo	HM_DR_16_G3.JPG	16/9/2019	4LC		108.473	15.9307
CLC	Hon Tai	HT_DR_16_G1.JPG	18/9/2019	2LC		108.532	15.9053
CLC	Hon dai		16/9/2019	D		108.475	15.9414
CLC	Hon Dai	HD_15_G_G5.JPG	17/9/2019	HB		108.484	15.9455
CLC	Hon Dai	HD_18_P3_G1.JPG	17/9/2019	4LC		108.484	15.9441
CLC	Hon Dai	HD_18_P3_G5.JPG	17/9/2019	4LC	4.8	108.484	15.9441
CLC	Hon Dai	HD_15_P4_G1.JPG	17/9/2019	HB		108.484	15.9454
CLC	Hon Dai	HD_15_P4_G4.JPG	17/9/2019	HB		108.484	15.9454
CLC	Hon Dai	HD_15_P4_G5.JPG	17/9/2019	HB	3.5	108.484	15.9454
CLC	Hon Dai	HD_DR_33_G5.JPG	17/9/2019	S	4.2	108.485	15.9467
CLC	Hon Dai	HD_19_P2_G2.JPG	17/9/2019	HB		108.484	15.9438
CLC	Hon Tai	HT_DR_16_G2.JPG	18/9/2019	2LC		108.532	15.9053
CLC	Hon Dai	HD_DR_38_G5.JPG	17/9/2019	S	2.8	108.485	15.9462
CLC	Hon Tai	HT_DR_16_G4.JPG	18/9/2019	2LC		108.532	15.9053
CLC	Hon Dai	HD_DR_55_G5.JPG	17/9/2019	S	3.8	108.484	15.9435
CLC	Hon Dai	HD_22_P1_G5.JPG	17/9/2019	3LC	5.6	108.483	15.9416
CLC	Hon Dai	HD_22_P1_G3.JPG	17/9/2019	3LC		108.483	15.9416
CLC	Hon Dai	HD_22_P3_G3.JPG	17/9/2019	3LC		108.483	15.9416
CLC	Hon Tai	HT_15_G_G4.JPG	18/9/2019	1LC		108.534	15.909
CLC	Hon Tai	HT_15_P1_G1.JPG	18/9/2019	1LC		108.534	15.909
CLC	Hon dai		16/9/2019	D	26	108.475	15.9416
CLC	Hon Tai	HT_15_P1_G2.JPG	18/9/2019	1LC		108.534	15.909
CLC	Hon Tai	HT_15_P1_G4.JPG	18/9/2019	1LC		108.534	15.909
CLC	Hon Dai	HD_DR_64_G4.JPG	17/9/2019	3LC		108.483	15.9417
CLC	Hon Dai	HD_DR_64_G1.JPG	17/9/2019	3LC		108.483	15.9417
CLC	Hon Dai	HD_DR_64_G5.JPG	17/9/2019	3LC	8.6	108.483	15.9418
CLC	Hon Dai	HD_DR_64_G3.JPG	17/9/2019	3LC		108.483	15.9418
CLC	Hon Dai	HD_DR_64_G2.JPG	17/9/2019	3LC		108.483	15.9418
CLC	Hon Dai	HD_20_G_G2.JPG	17/9/2019	HB		108.484	15.9433
CLC	Hon Tai	HT_15_P4_G1.JPG	18/9/2019	1LC		108.534	15.9091
CLC	Hon Dai	HD_DR_61_G3.JPG	17/9/2019	4LC		108.483	15.9423
CLC	Hon Tai	HT_15_P4_G3.JPG	18/9/2019	1LC		108.534	15.9091
CLC	Hon Tai	HT_DR_1_G1.JPG	18/9/2019	1LC		108.54	15.9032
CLC	Hon Tai	HT_DR_15	18/9/2019	1LC		108.54	15.9031
CLC	Hon Tai	HT_DR_22_G1.JPG	18/9/2019	1LC		108.532	15.906
CLC	Hon Dai	HD_O2_P3_G1.JPG	17/9/2019	4LC		108.478	15.9453
CLC	Hon Dai	HD_O2_P4_G1.JPG	17/9/2019	4LC		108.478	15.9453
CLC	Hon Tai	HT_DR_16_G5.JPG	18/9/2019	2LC		108.532	15.9053
CLC	Hon Tai	HT_DR_17_G1.JPG	18/9/2019	2LC		108.532	15.9053
CLC	Hon Dai	HD_DR_6_G1.JPG	17/9/2019	S		108.478	15.9452
CLC	Hon Dai	HD_DR_57_G2.JPG	17/9/2019	4LC		108.484	15.9429
CLC	Hon Dai	HD_20_P4_G3.JPG	17/9/2019	4LC		108.484	15.9433
CLC	Hon Dai	HD_20_P4_G2.JPG	17/9/2019	HB		108.484	15.9432
CLC	Hon Dai	HD_DR_6_G3.JPG	17/9/2019	S		108.478	15.9452
CLC	Hon Tai	HT_DR_22_G3.JPG	18/9/2019	1LC		108.532	15.906
CLC	Hon Dai	HD_21_P3_G3.JPG	17/9/2019	HB		108.483	15.9429
CLC	Hon Dai	HD_24_P2_G5.JPG	17/9/2019	HB	3.1	108.482	15.9398
CLC	Hon Tai	HT_DR_22_G4.JPG	18/9/2019	1LC		108.532	15.906
CLC	Hon Dai	HD_27_P1_G5.JPG	16/9/2019	HB		108.477	15.9421
CLC	Hon Dai	HD_27_P2_G1.JPG	16/9/2019	HB		108.477	15.9421
CLC	Hon Dai	HD_DR_6_G4.JPG	17/9/2019	S		108.478	15.9452
CLC	Hon Tai	HT_DR_22_G5.JPG	18/9/2019	1LC		108.532	15.906
CLC	Hon Dai	HD_DR_74_G2.JPG	17/9/2019	4LC		108.482	15.9398
CLC	Hon Dai	HD_DR_74_G3.JPG	17/9/2019	4LC		108.482	15.9398
CLC	Hon Tai	HT_DR_23_G2.JPG	18/9/2019	1LC		108.532	15.9061
CLC	Hon Tai	HT_DR_26_G5.JPG	18/9/2019	1LC		108.532	15.9064
CLC	Hon Dai	HD_DR_71_G3.JPG	17/9/2019	4LC		108.482	15.9404
CLC	Hon Dai	HD_20_P2_G3.JPG	17/9/2019	4LC		108.484	15.9434
CLC	Hon Tai	HT_DR_30_G2.JPG	18/9/2019	1LC		108.532	15.9066
CLC	Hon Tai	HT_DR_32_G1.JPG	18/9/2019	1LC		108.533	15.9081
CLC	Hon Dai	HD_DR_6_G51.JPG	17/9/2019	S		108.478	15.9452
CLC	Hon Tai	HT_DR_32_G2.JPG	18/9/2019	1LC		108.533	15.9082
CLC	Hon Dai	HD_27_P4_G5.JPG	16/9/2019	HB	2.8	108.477	15.9423
CLC	Hon Dai	HD_DR_1_G1.JPG	17/9/2019	HB		108.477	15.9448
CLC	Hon Dai	HD_DR_1_G2.JPG	17/9/2019	HB		108.477	15.9448
CLC	Hon Dai	HD_DR_1_G3.JPG	17/9/2019	HB		108.477	15.9448
CLC	Hon Dai	HD_DR_1_G4.JPG	17/9/2019	HB		108.477	15.9448
CLC	Hon Dai	HD_20_P4_G1.JPG	17/9/2019	4LC		108.484	15.9433
CLC	Hon Dai	HD_DR_58_G1.JPG	17/9/2019	3LC		108.484	15.9426
CLC	Hon Dai	HD_DR_59_G5.JPG	17/9/2019	3LC	10.2	108.484	15.9426
CLC	Hon Dai	HD_20_P2_G5.JPG	17/9/2019	4LC	7.5	108.484	15.9434
CLC	Hon Dai	HD_DR_6_G5.JPG	17/9/2019	S	4.1	108.478	15.9452
CLC	Hon Dai	HD_O2_G_G2.JPG	17/9/2019	S	4.2	108.478	15.9454
CLC	Hon Dai	HD_21_P4_G1.JPG	17/9/2019	3LC		108.483	15.9428
CLC	Hon Dai	HD_21_P4_G5.JPG	17/9/2019	3LC	5.5	108.483	15.9428
CLC	Hon Dai	HD_21_P4_G2.JPG	17/9/2019	3LC		108.483	15.9428
CLC	Hon Dai	HD_21_P3_G1.JPG	17/9/2019	3LC		108.483	15.9428
CLC	Hon Dai	HD_21_G_G1.JPG	17/9/2019	3LC		108.483	15.9428
CLC	Hon Dai	HD_DR_1_G5.JPG	17/9/2019	HB	10.5	108.477	15.9448
CLC	Hon Dai	HD_21_G_G5.JPG	17/9/2019	3LC	4.4	108.483	15.9428
CLC	Hon Dai	HD_O2_P1_G3.JPG	17/9/2019	S		108.478	15.9454
CLC	Hon Mo	HM_DR_16_G2.JPG	16/9/2019	4LC		108.473	15.9307
CLC	Hon Mo	HM_DR_16_G12.JPG	16/9/2019	4LC		108.473	15.9307
CLC	Hon Dai	HD_21_G_G2.JPG	17/9/2019	3LC		108.483	15.9429
CLC	Hon Dai	HD_21_P2_G3.JPG	17/9/2019	3LC	3.8	108.483	15.9429
CLC	Hon Dai	HD_21_P2_G1.JPG	17/9/2019	3LC		108.483	15.9429
CLC	Hon Dai	HD_O2_P1_G5.JPG	17/9/2019	S	5.3	108.478	15.9454
CLC	Hon Dai	HD_21_P2_G5.JPG	17/9/2019	3LC		108.483	15.9429
CLC	Hon Dai	HD_DR_57_G4.JPG	17/9/2019	4LC	10.5	108.484	15.9429
CLC	Hon Dai	HD_19_P1_G3.JPG	17/9/2019	4LC		108.484	15.9437
CLC	Hon Dai	HD_12_P4_G3.JPG	17/9/2019	4LC		108.485	15.9462
CLC	Hon Kho	HKM_DR_02_G1.JPG	12/9/2019	S		108.422	15.9739
CLC	Hon Dai	HD_DR_11_G4.JPG	17/9/2019	HB		108.478	15.9462
CLC	Hon Dai	HD_23_P3_G2.JPG	17/9/2019	4LC		108.482	15.9406
CLC	Hon Tai	HT_DR_32_G3.JPG	18/9/2019	1LC		108.533	15.9082
CLC	Hon Tai	HT_DR_34_G1.JPG	18/9/2019	1LC		108.533	15.9081
CLC	Hon Tai	HT_DR_35_G3.JPG	18/9/2019	1LC		108.533	15.9083
CLC	Bai Chong-Bai Bim		22/9/2019	D	14.2	108.508	15.9433
CLC	Hon Tai	HT_DR_35_G4.JPG	18/9/2019	1LC		108.533	15.9083
CLC	Hon Tai	HT_DR_42_G1.JPG	18/9/2019	1LC		108.534	15.9086
CLC	Hon Tai	HT_DR_45_G4.JPG	18/9/2019	1LC		108.534	15.9091
CLC	Hon Dai	HD_DR_70_G1.JPG	17/9/2019	4LC		108.482	15.9408
CLC	Hon Tai	HT_DR_17_G2.JPG	18/9/2019	2LC		108.532	15.9053
CLC	Hon Tai	HT_DR_47_G1.JPG	18/9/2019	1LC		108.534	15.9093
CLC	Hon Tai	HT_DR_17_G3.JPG	18/9/2019	2LC		108.532	15.9053
CLC	Bai Chong-Bai Bim	BC_DR_09_G1.JPG	22/9/2019	3LC		108.509	15.9435
CLC	Hon Tai	HT_DR_47_G1.JPG	18/9/2019	1LC		108.534	15.9093
CLC	Hon Tai	HT_DR_49_G5.JPG	19/9/2019	1LC		108.54	15.9118
CLC	Hon La	HLN_O3_2_6_G3.JPG	13/9/2019	4LC		108.445	15.9688
CLC	Hon Kho	HKM_O3_2_2_G5.JPG	12/9/2019	S		108.421	15.9728
CLC	Hon Tai	HT_DR_17_G4.JPG	18/9/2019	2LC		108.532	15.9053
CLC	Hon Tai	HT_DR_54_G1.JPG	19/9/2019	1LC		108.539	15.9115
CLC	Hon Dai	HD_DR_56_G3.JPG	17/9/2019	3LC		108.484	15.9432
CLC	Bai Chong-Bai Bim	BC_DR_09_G5.JPG	22/9/2019	3LC	3.5	108.509	15.9435
CLC	Hon Tai	HT_DR_55_G1.JPG	19/9/2019	1LC		108.539	15.9114
CLC	Hon Tai	HT_DR_55_G2.JPG	19/9/2019	1LC		108.539	15.9115
CLC	Hon Tai	HT_DR_55_G4.JPG	19/9/2019	1LC		108.539	15.9114
CLC	Hon Mo	HM_DR_16_G1.JPG	16/9/2019	4LC		108.473	15.9307
CLC	Hon Dai	HD_DR_71_G1.JPG	17/9/2019	4LC		108.482	15.9404
CLC	Bai Chong-Bai Bim	BC_DR_04_G5.JPG	22/9/2019	3LC	4.4	108.509	15.9435
CLC	Hon Dai	HD_DR_70_G3.JPG	17/9/2019	4LC		108.482	15.9408
CLC	Hon Dai	HD_DR_61_G1.JPG	17/9/2019	4LC		108.483	15.9422
CLC	Hon Dai	HD_DR_57_G3.JPG	17/9/2019	4LC		108.484	15.9429
CLC	Hon Dai	HD_20_P2_G1x.JPG	17/9/2019	4LC		108.484	15.9433
CLC	Hon Dai	HD_20_P3_G3.JPG	17/9/2019	3LC		108.484	15.9433
CLC	Hon Kho	HKM_O3_2_3	12/9/2019	S	12.5	108.421	15.972
CLC	Hon Kho	HKM_O3_3_2_G5.JPG	12/9/2019	S		108.421	15.9728
CLC	Bai Chong-Bai Bim	BC_DR_08_G5.JPG	22/9/2019	3LC	3.1	108.509	15.9436
CLC	Hon Dai	HD_DR_17_G1.JPG	17/9/2019	HB		108.479	15.9475
CLC	Hon Dai	HD_DR_18_G5.JPG	17/9/2019	HB	9.4	108.479	15.9478
CLC	Hon Tai	HT_DR_55_G5.JPG	19/9/2019	1LC		108.539	15.9114
CLC	Hon Dai	HD_DR_20_G1.JPG	17/9/2019	HB		108.48	15.9484
CLC	Hon Dai	HD_20_G_G1.JPG	17/9/2019	3LC	6.3	108.484	15.9433
CLC	Hon Kho	HKM_O3_3_3_G2.JPG	12/9/2019	S		108.422	15.9727
CLC	Hon Tai	HT_DR_18_G1.JPG	18/9/2019	2LC		108.532	15.9055
CLC	Hon Tai	HT_DR_18_G3.JPG	18/9/2019	2LC		108.532	15.9055
CLC	Hon Dai	HD_24_P4_G5.JPG	17/9/2019	4LC	4.8	108.482	15.9397
CLC	Hon Dai	HD_23_P3_G1.JPG	17/9/2019	4LC		108.482	15.9406
CLC	Hon Tai	HT_DR_18_G4.JPG	18/9/2019	2LC		108.532	15.9055
CLC	Hon Tai	HT_DR_18_G5.JPG	18/9/2019	2LC		108.532	15.9055
CLC	Hon Tai	HT_DR_2_G1.JPG	18/9/2019	2LC		108.54	15.9032
CLC	Hon Tai	HT_DR_2_G2.JPG	18/9/2019	2LC		108.54	15.9033
CLC	Hon Tai	HT_DR_2_G4.JPG	18/9/2019	2LC		108.54	15.9032
CLC	Hon La	HLN_DR_10_G1.JPG	13/9/2019	S		108.445	15.9683
CLC	Hon La	HLN_DR_10_G4.JPG	13/9/2019	S		108.445	15.9682
CLC	Hon Dai	HD_DR_20_G2.JPG	17/9/2019	HB		108.48	15.9484
CLC	Hon Tai	HT_DR_59_G4.JPG	19/9/2019	1LC		108.539	15.9112
CLC	Hon Tai	HT_DR_3_G4.JPG	18/9/2019	2LC		108.54	15.9034
CLC	Hon Dai	HD_DR_20_G3.JPG	17/9/2019	HB		108.48	15.9484
CLC	Hon La	HLN_DR_10_G5.JPG	13/9/2019	S	7.2	108.445	15.9683
CLC	Hon Dai	HD_DR_62_G4.JPG	17/9/2019	4LC		108.483	15.942
CLC	Hon Tai	HT_DR_60_G5.JPG	19/9/2019	1LC		108.539	15.9112
CLC	Hon Tai	HT_O5_P3_G4.JPG	18/9/2019	1LC		108.539	15.9031
CLC	Hon Dai	HD_DR_56_G5.JPG	17/9/2019	4LC	8.2	108.484	15.9432
CLC	Hon Dai	HD_20_P4_G5.JPG	17/9/2019	4LC	4.6	108.484	15.9433
CLC	Hon Dai	HD_20_P2_G4.JPG	17/9/2019	4LC		108.484	15.9433
CLC	Hon Dai	HD_DR_35_G1.JPG	17/9/2019	4LC		108.485	15.9463
CLC	Hon Dai	HD_DR_54_G5.JPG	17/9/2019	3LC	8.2	108.484	15.9436
CLC	Hon Dai	HD_DR_20_G5.JPG	17/9/2019	HB	8.9	108.48	15.9484
CLC	Hon La	HLN_O1_3_1_G5.JPG	13/9/2019	S	5.2	108.443	15.9704
CLC	Hon La	HLN_O3_3_10_G5.JPG	13/9/2019	S		108.444	15.9688
CLC	Hon Tai	HT_O8_P1_G1.JPG	18/9/2019	4LC		108.532	15.9057
CLC	Hon Dai	HD_DR_73_G4x.JPG	17/9/2019	4LC		108.482	15.9399
CLC	Hon Dai	HD_19_P4_G2.JPG	17/9/2019	3LC		108.484	15.9437
CLC	Hon Dai	HD_DR_62_G1.JPG	17/9/2019	4LC		108.483	15.942
CLC	Hon Dai	HD_19_P1_G4.JPG	17/9/2019	3LC		108.484	15.9437
CLC	Hon Dai	HD_19_P1_G1.JPG	17/9/2019	3LC		108.484	15.9437
CLC	Hon Dai	HD_DR_20_G5.JPG	17/9/2019	HB	8.9	108.48	15.9484
CLC	Hon Dai	HD_DR_23_G2.JPG	17/9/2019	HB	6.2	108.481	15.9488
CLC	Hon Dai	HD_DR_24_G5.JPG	17/9/2019	HB		108.481	15.9487
CLC	Hon Dai	HD_19_P1_G5.JPG	17/9/2019	3LC	6.8	108.484	15.9437
CLC	Hon Dai	HD_19_P1_G2.JPG	17/9/2019	3LC		108.484	15.9437
CLC	Hon La	HLN1_02_P4_G5.JPG	13/9/2019	4LC	4.7	108.451	15.973
CLC	Hon Kho	HKM_O3_1_9_G5.JPG	12/9/2019	4LC		108.421	15.9726
CLC	Hon Dai	HD_DR_53_G31.JPG	17/9/2019	3LC		108.484	15.9437
CLC	Hon Dai	HD_DR_53_G3.JPG	17/9/2019	3LC		108.484	15.9438
CLC	Hon Dai	HD_DR_25_G1.JPG	17/9/2019	HB		108.482	15.9486
CLC	Hon Dai	HD_DR_25_G5.JPG	17/9/2019	HB	10.5	108.482	15.9486
CLC	Hon Dai	HD_DR_53_G31.JPG	17/9/2019	3LC		108.484	15.9438
CLC	Hon Dai	HD_DR_53_G2.JPG	17/9/2019	3LC		108.484	15.9438
CLC	Hon Dai	HD_DR_53_G3.JPG	17/9/2019	3LC		108.484	15.9438
CLC	Hon Tai	HT_DR_35_G1.JPG	18/9/2019	2LC		108.533	15.9083
CLC	Hon Tai	HT_DR_40_G2.JPG	18/9/2019	2LC		108.534	15.9086
CLC	Hon Tai	HT_DR_41_G3.JPG	18/9/2019	2LC		108.533	15.9086
CLC	Hon Tai	HT_DR_6_G1.JPG	18/9/2019	2LC		108.54	15.9034
CLC	Hon Tai	HT_DR_6_G2.JPG	18/9/2019	2LC		108.54	15.9034
CLC	Hon Tai	HT_O8_P1_G2.JPG	18/9/2019	4LC		108.532	15.9057
CLC	Hon Tai	HT_O8_P1_G3.JPG	18/9/2019	4LC		108.532	15.9057
CLC	Hon Tai	HT_O8_P1_G4.JPG	18/9/2019	4LC		108.532	15.9057
CLC	Hon Tai	HT_O8_P1_G5.JPG	18/9/2019	4LC	4.2	108.532	15.9057
CLC	Hon Mo	HM_DR_15_G5.JPG	16/9/2019	4LC	5.2	108.472	15.9308
CLC	Hon Mo	HM_DR_15_G4.JPG	16/9/2019	4LC		108.472	15.9308
CLC	Hon Dai	HD_20_P1_G4.JPG	17/9/2019	4LC		108.484	15.9434
CLC	Hon Dai	HD_20_P1_G3.JPG	17/9/2019	4LC		108.484	15.9434
CLC	Hon Tai	HT_O8_P2_G5.JPG	18/9/2019	4LC	2.8	108.532	15.9057
CLC	Bai Ban	BN_DR_3_G51.JPG	19/9/2019	1LC		108.534	15.924
CLC	Hon Dai	HD_DR_3_G4.JPG	17/9/2019	HB		108.478	15.945
CLC	Bai Ban	BN_DR_9_G51.JPG	19/9/2019	1LC		108.533	15.9245
CLC	Bai Ban	BN_DR_9_G52.JPG	19/9/2019	1LC		108.533	15.9245
CLC	Hon Dai	HD_DR_50_G5.JPG	17/9/2019	3LC		108.484	15.9442
CLC	Hon Dai	HD_DR_50_G4.JPG	17/9/2019	3LC		108.484	15.9442
CLC	Bai Ban	BN_DR_9_G5.JPG	19/9/2019	1LC		108.533	15.9245
CLC	Hon Dai	HD_DR_50_G1.JPG	17/9/2019	3LC	6.8	108.484	15.9442
CLC	Bai Ban	BN_DR_9_G53.JPG	19/9/2019	1LC		108.533	15.9245
CLC	Hon Dai	HD_DR_50_G3.JPG	17/9/2019	3LC		108.484	15.9442
CLC	Hon Dai	HD_DR_48_G2.JPG	17/9/2019	HB		108.484	15.9445
CLC	Hon Dai	HD_DR_50_G2.JPG	17/9/2019	3LC		108.484	15.9442
CLC	Hon Dai	HD_DR_69_G3.JPG	17/9/2019	4LC	4.3	108.482	15.941
CLC	Bai Ban	BN_O5_G_G2.JPG	19/9/2019	1LC		108.532	15.9252
CLC	Bai Huong	BH_DR_3_G2.JPG	20/9/2019	1LC		108.53	15.9269
CLC	Bai Huong	BH_DR_8_G51.JPG	20/9/2019	1LC		108.53	15.9272
CLC	Hon Tai	HT_DR_6_G3.JPG	18/9/2019	2LC		108.54	15.9035
CLC	Hon dai		17/9/2019	D		108.475	15.9443
CLC	Hon Dai	HD_DR_61_G2.JPG	17/9/2019	4LC	5.8	108.483	15.9423
CLC	Hon Dai	HD_DR_59_G1.JPG	17/9/2019	4LC		108.484	15.9426
CLC	Hon Dai	HD_DR_54_G1.JPG	17/9/2019	4LC		108.484	15.9436
CLC	Hon Tai	HT_DR_6_G4.JPG	18/9/2019	2LC		108.54	15.9034
CLC	Hon dai		17/9/2019	D	27.7	108.475	15.9444
CLC	Bai Huong	BH_DR_8_G52.JPG	20/9/2019	1LC		108.53	15.9272
CLC	Hon dai		17/9/2019	D		108.475	15.9445
CLC	Hon dai		17/9/2019	D		108.475	15.9446
CLC	Hon Dai	HD_DR_37_G3.JPG	17/9/2019	4LC		108.485	15.946
CLC	Bai Huong	BH_DR_8_G53.JPG	20/9/2019	1LC		108.53	15.9273
CLC	Bai Huong	BH_DR_8_G5.JPG	20/9/2019	1LC		108.53	15.9273
CLC	Bai Huong	BH_O7_P4_G3.JPG	20/9/2019	1LC		108.529	15.9295
CLC	Bai Huong	BH_O7_G_G2.JPG	20/9/2019	1LC		108.529	15.9295
CLC	Hon Dai	HD_17_G_G1.JPG	17/9/2019	3LC		108.484	15.9448
CLC	Hon Dai	HD_17_P1_G1.JPG	17/9/2019	3LC		108.484	15.9448
CLC	Bai Huong	BH_08_P4_G51.JPG	20/9/2019	1LC		108.529	15.93
CLC	Hon Dai	HD_17_P1_G5.JPG	17/9/2019	3LC	6.5	108.484	15.9448
CLC	Hon Dai	HD_17_P1_G2.JPG	17/9/2019	3LC		108.484	15.9448
CLC	Hon Dai	HD_17_P1_G3.JPG	17/9/2019	3LC		108.484	15.9448
CLC	Hon Dai	HD_17_P2_G5.JPG	17/9/2019	3LC	4.7	108.484	15.9448
CLC	Hon Tai	HT_O2_P4_G3.JPG	18/9/2019	2LC		108.54	15.9035
CLC	Hon Tai	HT_O2_P4_G4.JPG	18/9/2019	2LC		108.54	15.9035
CLC	Hon Dai	HD_DR_49_G1.JPG	17/9/2019	HB		108.484	15.9443
CLC	Bai Huong	BH_DR_30_G5.JPG	20/9/2019	1LC		108.529	15.9301
CLC	Hon Tai	HT_O4_G_G3.JPG	18/9/2019	2LC		108.54	15.9035
CLC	Hon Mo	HM_DR_15_G3.JPG	16/9/2019	4LC		108.472	15.9308
CLC	Hon Dai	HD_DR_55_G4.JPG	17/9/2019	HB		108.484	15.9435
CLC	Hon Dai	HD_DR_68_G5.JPG	17/9/2019	HB	3.4	108.483	15.9411
CLC	Hon Tai	HT_O4_G_G4.JPG	18/9/2019	2LC		108.54	15.9034
CLC	Hon Tai	HT_O4_P3_G2.JPG	18/9/2019	2LC		108.54	15.9035
CLC	Hon Tai	HT_O6_G_G2.JPG	18/9/2019	2LC		108.532	15.9053
CLC	Bai Huong	BH_DR_41_G5.JPG	20/9/2019	1LC		108.527	15.9314
CLC	Hon Dai	HD_DR_68_G5.JPG	17/9/2019	HB	3.4	108.483	15.9411
CLC	Hon Mo	HM_O8_P2_G1.JPG	16/9/2019	1LC		108.472	15.9313
CLC	Hon Tai	HT_O6_P1_G1.JPG	18/9/2019	2LC		108.532	15.9053
CLC	Hon Kho	HKM_O3_1_10_G5.JPG	12/9/2019	4LC		108.421	15.9726
CLC	Hon Dai	HD_16_P3_G3.JPG	17/9/2019	3LC		108.484	15.9452
CLC	Hon Mo	HM_O8_P1_G4.JPG	16/9/2019	1LC		108.472	15.9314
CLC	Hon Tai	HT_O6_P1_G3.JPG	18/9/2019	2LC		108.532	15.9053
CLC	Bai Ban	BN_DR_1_G5.JPG	19/9/2019	2LC		108.533	15.9236
CLC	Hon Kho	HKM_O3_1_10_G2.JPG	12/9/2019	4LC		108.421	15.9726
CLC	Hon Dai	HD_16_P4_G4.JPG	17/9/2019	3LC		108.484	15.9452
CLC	Hon Mo	HM_O8_P1_G3.JPG	16/9/2019	1LC		108.472	15.9314
CLC	Hon Dai	HD_16_P4_G1.JPG	17/9/2019	3LC		108.484	15.9452
CLC	Hon Mo	HM_O8_P1_G2.JPG	16/9/2019	1LC		108.472	15.9314
CLC	Hon Dai	HD_DR_68_G5.JPG	17/9/2019	HB	3.4	108.482	15.9411
CLC	Hon Dai	HD_16_G_G5.JPG	17/9/2019	3LC	5	108.484	15.9452
CLC	Hon Dai	HD_DR_61_G5.JPG	17/9/2019	4LC		108.483	15.9423
CLC	Hon Dai	HD_16_P4_G5.JPG	17/9/2019	3LC	4.1	108.484	15.9452
CLC	Hon Dai	HD_DR_83_G1.JPG	16/9/2019	HB		108.477	15.9407
CLC	Bai Ban	BN_O2_P3_G2.JPG	19/9/2019	2LC		108.533	15.9241
CLC	Hon Mo	HM_O8_P1_G1.JPG	16/9/2019	1LC		108.472	15.9314
CLC	Hon Mo	HM_O8_G_G4.JPG	16/9/2019	1LC		108.472	15.9313
CLC	Bai Ban	BN_O3_P4_G2.JPG	19/9/2019	2LC		108.533	15.9245
CLC	Hon Dai	HD_16_P2_G5.JPG	17/9/2019	3LC	5.1	108.484	15.9452
CLC	Hon Dai	HD_DR_83_G2.JPG	16/9/2019	HB		108.477	15.9407
CLC	Hon Dai	HD_DR_83_G3.JPG	16/9/2019	HB		108.477	15.9407
CLC	Bai Ban	BN_O3_P3_G5.JPG	19/9/2019	2LC		108.533	15.9245
CLC	Hon Mo	HM_O8_G_G1.JPG	16/9/2019	1LC		108.472	15.9313
CLC	Hon dai		17/9/2019	D	15	108.477	15.9452
CLC	Bai Ban	BN_O5_G_G21.JPG	19/9/2019	2LC		108.532	15.9252
CLC	Hon Tai		18/9/2019	D	18.9	108.535	15.9015
CLC	Hon Mo	HM_O7_P3_G23x.JPG	16/9/2019	1LC		108.472	15.9319
CLC	Hon Mo	HM_O7_P2_G3.JPG	16/9/2019	1LC		108.472	15.932
CLC	Hon Tai		18/9/2019	D	21	108.535	15.9017
CLC	Hon Mo	HM_O7_P1_G4.JPG	16/9/2019	1LC		108.472	15.932
CLC	Hon Tai		18/9/2019	D	19	108.54	15.902
CLC	Hon Tai		18/9/2019	D		108.54	15.902
CLC	Hon Dai	HD_22_G_G5.JPG	17/9/2019	4LC	4.4	108.483	15.9416
CLC	Hon Mo	HM_O7_P1_G3x.JPG	16/9/2019	1LC		108.472	15.932
CLC	Bai Ban	BN_O5_P1_G5.JPG	19/9/2019	2LC		108.532	15.9252
CLC	Hon Dai	HD_DR_37_G5.JPG	17/9/2019	4LC		108.485	15.946
CLC	Hon Tai	HT_O6_P1_G4.JPG	18/9/2019	2LC		108.532	15.9053
CLC	Bai Ban	BN_DR_26_G21.JPG	19/9/2019	2LC		108.532	15.9254
CLC	Bai Ban	BN_DR_26_G22.JPG	19/9/2019	2LC		108.532	15.9254
CLC	Hon Dai	HD_DR_37_G2.JPG	17/9/2019	4LC		108.485	15.946
CLC	Hon Dai	HD_DR_83_G4.JPG	16/9/2019	HB		108.477	15.9407
CLC	Bai Ban	BN_DR_26_G23.JPG	19/9/2019	2LC		108.532	15.9254
CLC	Hon Dai	HD_DR_42_G4.JPG	17/9/2019	3LC		108.485	15.9454
CLC	Hon Dai	HD_DR_83_G5.JPG	16/9/2019	HB		108.477	15.9407
CLC	Hon Dai	HD_DR_42_G1.JPG	17/9/2019	3LC		108.485	15.9454
CLC	Hon dai		17/9/2019	D	20.4	108.476	15.9453
CLC	Hon Dai	HD_DR_42_G2.JPG	17/9/2019	3LC		108.485	15.9454
CLC	Hon Dai	HD_DR_85_G1.JPG	16/9/2019	HB		108.477	15.9409
CLC	Hon Dai	HD_DR_43_G5.JPG	17/9/2019	3LC	5.5	108.484	15.9454
CLC	Hon Dai	HD_DR_43_G1.JPG	17/9/2019	3LC		108.485	15.9454
CLC	Hon Dai	HD_DR_85_G2.JPG	16/9/2019	HB		108.477	15.941
CLC	Hon Dai	HD_DR_69_G2.JPG	17/9/2019	4LC		108.482	15.941
CLC	Bai Lang -Bai Xep	BX_O5_P2_G1.JPG	22/9/2019	4LC		108.508	15.9477
CLC	Hon Dai	HD_DR_85_G3.JPG	16/9/2019	HB		108.477	15.941
CLC	Hon Tai		18/9/2019	D		108.541	15.9021
CLC	Hon Dai	HD_DR_42_G5.JPG	17/9/2019	3LC	7.8	108.485	15.9454
CLC	Hon Dai	HD_15_G_G2.JPG	17/9/2019	3LC		108.484	15.9454
CLC	Hon Dai	HD_DR_42_G3.JPG	17/9/2019	3LC		108.485	15.9455
CLC	Hon Mo	HM_DR_15_G2.JPG	16/9/2019	4LC		108.472	15.9308
CLC	SunGroup	Camera 360	21/9/2019	S		108.52	15.9366
CLC	Hon Dai	HD_DR_43_G2.JPG	17/9/2019	3LC		108.484	15.9455
CLC	Hon Dai	HD_DR_43_G3.JPG	17/9/2019	3LC		108.484	15.9455
CLC	SunGroup	Camera 360	21/9/2019	S		108.521	15.9365
CLC	Hon Dai	HD_DR_71_G2.JPG	17/9/2019	4LC		108.482	15.9404
CLC	Hon dai		17/9/2019	D		108.476	15.9454
CLC	Hon Dai	HD_22_G_G2.JPG	17/9/2019	4LC		108.483	15.9416
CLC	Hon Dai	HD_DR_85_G5.JPG	16/9/2019	HB	6.9	108.477	15.941
CLC	Hon Dai	HD_DR_86_G4.JPG	16/9/2019	HB		108.477	15.9409
CLC	Mui Dua	MDUA_DR_10_G2.JPG	19/9/2019	S		108.537	15.9221
CLC			22/9/2019	D	14	108.507	15.9458
CLC	Hon Dai	HD_DR_9_G2.JPG	17/9/2019	HB		108.478	15.9458
CLC	Hon dai		17/9/2019	D		108.476	15.9454
CLC	Hon Dai	HD_DR_91_G5.JPG	16/9/2019	HB		108.477	15.9415
CLC	Hon Dai	HD_DR_41_G1.JPG	17/9/2019	3LC	8.5	108.485	15.9456
CLC	Bai Ban	BN_DR_26_G2.JPG	19/9/2019	2LC		108.532	15.9254
CLC	Bai Ban	BN_DR_26_G2.JPG	19/9/2019	2LC		108.532	15.9254
CLC	Hon dai		17/9/2019	D		108.476	15.9455
CLC	Hon Tai		18/9/2019	D	19	108.541	15.9023
CLC	Hon Mo	HM_O7_P1_G2.JPG	16/9/2019	1LC		108.472	15.932
CLC	Hon dai		17/9/2019	D	20.4	108.477	15.9456
CLC	Hon Tai		18/9/2019	D	18	108.54	15.9024
CLC	Bai Chong-Bai Bim	Camera 360	21/9/2019	S		108.516	15.9379
CLC	Hon Dai	HD_DR_40_G2x.JPG	17/9/2019	3LC	6.8	108.485	15.9457
CLC	Bai Lang -Bai Xep	BX_DR_59_G1.JPG	22/9/2019	3LC	4.3	108.508	15.946
CLC	Hon Dai	HD_DR_39_G4.JPG	17/9/2019	3LC		108.485	15.9458
CLC	Bai Ban	BN_DR_27_G5.JPG	20/9/2019	2LC		108.531	15.9255
CLC	Bai Ban	BN_DR_30_G3.JPG	20/9/2019	2LC		108.531	15.9256
CLC	Hon Dai	HD_DR_39_G1.JPG	17/9/2019	3LC		108.485	15.9458
CLC	Hon Dai	HD_DR_39_G5.JPG	17/9/2019	3LC	5.4	108.485	15.9458
CLC	Bai Huong	BH_DR_6_G1.JPG	20/9/2019	2LC		108.53	15.9269
CLC	Bai Huong	BH_O2_G_G5.JPG	20/9/2019	2LC		108.53	15.927
CLC	Bai Huong	BH_DR_11_G2.JPG	20/9/2019	2LC		108.53	15.9277
CLC	Hon Dai	HD_DR_39_G2.JPG	17/9/2019	3LC		108.485	15.9458
CLC	Hon Dai	HD_DR_39_G3.JPG	17/9/2019	3LC		108.485	15.9458
CLC	Hon Dai	HD_14_P4_G2.JPG	17/9/2019	3LC	4.7	108.485	15.9458
CLC	Hon Dai	HD_DR_74_G4.JPG	17/9/2019	4LC		108.482	15.9397
CLC	Hon Dai	HD_14_P3_G1.JPG	17/9/2019	3LC		108.485	15.9458
CLC	Bai Huong	BH_O3_P4_G5.JPG	20/9/2019	2LC		108.53	15.9277
CLC	Hon Dai	HD_DR_62_G5.JPG	17/9/2019	4LC	4.5	108.483	15.942
CLC	Bai Huong	BH_O5_P1_G3.JPG	20/9/2019	2LC		108.53	15.9285
CLC	Hon Dai	HD_14_P3_G4.JPG	17/9/2019	3LC		108.485	15.9458
CLC	Hon Dai	HD_14_P1_G1.JPG	17/9/2019	3LC		108.485	15.9458
CLC	Hon Dai	HD_14_P1_G4.JPG	17/9/2019	3LC		108.485	15.9458
CLC	Bai Bac	Camera 360	15/9/2019	S		108.49	15.9589
CLC	Hon Dai	HD_14_P3_G5.JPG	17/9/2019	3LC	3.7	108.485	15.9458
CLC	Hon Dai	HD_14_P1_G5.JPG	17/9/2019	3LC	3.5	108.485	15.9458
CLC	Hon Tai		18/9/2019	D		108.533	15.9026
CLC	Hon Mo	HM_O7_P1_G1.JPG	16/9/2019	1LC		108.472	15.932
CLC	Hon Dai	HD_14_P3_G2.JPG	17/9/2019	3LC		108.485	15.9459
CLC	Hon Dai	HD_14_P1_G3.JPG	17/9/2019	3LC		108.485	15.9459
CLC	Hon Tai		18/9/2019	D	16	108.531	15.904
CLC	Hon Dai	HD_14_P2_G5.JPG	17/9/2019	3LC		108.485	15.9459
CLC	Hon Dai	HD_O3_P1_G2.JPG	17/9/2019	HB		108.478	15.946
CLC	Hon Mo	HM_O3_P2_G2.JPG	16/9/2019	1LC		108.476	15.9332
CLC	Bai Ong	Camera 360	15/9/2019	S		108.493	15.9555
CLC	Hon Mo	HM_O3_P1_G3.JPG	16/9/2019	1LC		108.476	15.9332
CLC	Hon Mo	HM_O3_P1_G2.JPG	16/9/2019	1LC		108.476	15.9332
CLC	Hon Mo	HM_O3_P1_G1.JPG	16/9/2019	1LC		108.476	15.9332
CLC	Hon Mo	HM_O3_G_G5.JPG	16/9/2019	1LC		108.476	15.9332
CLC	Hon La	HLN_O3_2_7_G4.JPG	13/9/2019	4LC		108.445	15.9688
CLC	Hon Dai	HD_O3_P1_G3.JPG	17/9/2019	HB		108.478	15.946
CLC	Hon Dai	HD_O3_P1_G5.JPG	17/9/2019	HB	5.9	108.478	15.9459
CLC	Hon Dai	HD_DR_58_G3.JPG	17/9/2019	4LC		108.484	15.9427
CLC	Hon Dai	HD_20_P3_G2.JPG	17/9/2019	4LC		108.484	15.9433
CLC	Hon Dai	HD_DR_35_G4.JPG	17/9/2019	4LC		108.485	15.9463
CLC	Bai Chong-Bai Bim	Camera 360	21/9/2019	S		108.515	15.9382
CLC	Hon Kho	HKM_O3_1_3_G5.JPG	12/9/2019	4LC		108.421	15.9728
CLC	Hon Dai	HD_DR_74_G1.JPG	17/9/2019	4LC		108.482	15.9397
CLC	Hon Dai	HD_DR_74_G5.JPG	17/9/2019	4LC		108.482	15.9397
CLC	Hon Kho	Camera 360	12/9/2019	S	9.2	108.418	15.9721
CLC	Hon La	HLN_O3_2_5_G3.JPG	13/9/2019	4LC		108.445	15.9689
CLC	Hon Kho	HKC_O2_1_10_G2.JPG	12/9/2019	4LC		108.418	15.973
CLC		Camera 360	21/9/2019	S		108.518	15.9377
CLC	Hon Tai		18/9/2019	3LC		108.532	15.9051
CLC	Hon Dai	HD_DR_69_G1.JPG	17/9/2019	4LC		108.482	15.9409
CLC	Bai Chong-Bai Bim	Camera 360	21/9/2019	S		108.512	15.9421
CLC	Hon Dai	HD_O3_P2_G5.JPG	17/9/2019	HB	4.4	108.478	15.946
CLC	Hon Dai	HD_O4_P3_G3.JPG	17/9/2019	HB		108.478	15.9466
CLC	Hon Mo	HM_O2_P2_G3.JPG	16/9/2019	1LC		108.475	15.9335
CLC	Hon Mo	HM_O2_P2_G2.JPG	16/9/2019	1LC		108.475	15.9335
CLC	Bai Ong	Camera 360	15/9/2019	S		108.495	15.9556
CLC	Hon Dai	HD_O4_P3_G4.JPG	17/9/2019	HB		108.478	15.9466
CLC			22/9/2019	D	14	108.507	15.9463
CLC	Hon Mo	HM_O2_P2_G1.JPG	16/9/2019	1LC		108.475	15.9335
CLC	Bai Huong	Camera 360	20/9/2019	S		108.53	15.927
CLC	Bai Chong-Bai Bim	Camera 360	22/9/2019	S		108.51	15.9431
CLC	Hon Mo	HM_O2_G_G2.JPG	16/9/2019	1LC		108.475	15.9334
CLC	Hon Mo	HM_O1_G_G5.JPG	16/9/2019	1LC		108.474	15.9336
CLC	Hon Dai	HD_DR_76_G4.JPG	17/9/2019	4LC		108.481	15.9393
CLC	Hon Dai	HD_DR_70_G1.JPG	17/9/2019	4LC		108.482	15.9407
CLC	Hon Mo	HM_O1_G_G4.JPG	16/9/2019	1LC		108.474	15.9336
CLC	Hon Mo	HM_O1_G_G3.JPG	16/9/2019	1LC		108.474	15.9336
CLC	Hon Dai	HD_DR_63_G3.JPG	17/9/2019	4LC		108.483	15.942
CLC	Hon Dai	HD_DR_57_G5.JPG	17/9/2019	4LC		108.484	15.9429
CLC	Hon Mo	HM_O1_G_G1.JPG	16/9/2019	1LC		108.474	15.9336
CLC	Hon Mo	HM_DR_3_G3.JPG	16/9/2019	1LC		108.476	15.9332
CLC	Hon Mo	HM_DR_2_G5.JPG	16/9/2019	1LC		108.475	15.9334
CLC	Hon Dai	HD_O4_P4_G1x.JPG	17/9/2019	HB	7.4	108.478	15.9466
CLC	Hon Mo	HM_DR_2_G3.JPG	16/9/2019	1LC		108.475	15.9334
CLC	Hon Mo	HM_DR_2_G2.JPG	16/9/2019	1LC		108.476	15.9334
CLC	Hon Dai	HD_O4_P4_G3.JPG	17/9/2019	HB		108.478	15.9466
CLC	SunGroup	Camera 360	21/9/2019	HB		108.524	15.9326
CLC			22/9/2019	D		108.506	15.9464
CLC	Hon Dai	HD_DR_62_G5.JPG	17/9/2019	4LC	4.5	108.483	15.9421
CLC			22/9/2019	D		108.506	15.9465
CLC	Hon Dai	HD_O4_P4_G4.JPG	17/9/2019	HB		108.478	15.9465
CLC	Hon Dai	HD_O5_P1_G3.JPG	17/9/2019	HB		108.481	15.9485
CLC	Hon Dai	HD_O5_P1_G5.JPG	17/9/2019	HB	3	108.481	15.9485
CLC			22/9/2019	D		108.506	15.9465
CLC	Hon Kho	HKC_O2_1_10_G5.JPG	12/9/2019	4LC		108.418	15.973
CLC	Bai Huong	BH_O5_P1_G5.JPG	20/9/2019	2LC		108.53	15.9285
CLC	Hon Tai		18/9/2019	D	14.5	108.532	15.9059
CLC	Hon Dai	HD_23_P2_G1.JPG	17/9/2019	4LC		108.482	15.9407
CLC	Hon Dai	HD_DR_59_G4.JPG	17/9/2019	4LC		108.484	15.9426
CLC	Hon Dai	HD_O5_P2_G5.JPG	17/9/2019	HB	3.1	108.481	15.9485
CLC	Hon Dai	HD_20_P1_G1.JPG	17/9/2019	4LC		108.484	15.9434
CLC	Hon Dai	HD_20_P1_G5.JPG	17/9/2019	4LC	4.5	108.484	15.9434
CLC	Hon Dai	HD_20_P1_G2.JPG	17/9/2019	4LC		108.484	15.9434
CLC	Bai Ong	Camera 360	15/9/2019	S		108.494	15.9556
CLC			22/9/2019	D	15.1	108.506	15.9466
CLC	Hon Mo	HM_DR_2_G1.JPG	16/9/2019	1LC		108.476	15.9334
CLC	Hon Dai	HD_O5_P4_G3.JPG	17/9/2019	HB	2.4	108.481	15.9484
CLC	SunGroup	BBi_DR_32_G5.JPG	21/9/2019	1LC		108.52	15.9367
CLC	Hon Dai	HD_DR_85_G4.JPG	17/9/2019	1LC		108.48	15.9378
CLC	Hon La	HLN_O1_2_3_G5.JPG	13/9/2019	4LC		108.443	15.9705
CLC	Hon La	HLN_O1_2_5_G3.JPG	13/9/2019	4LC		108.443	15.9705
CLC	Hon Dai	HD_O5_P4_G5.JPG	17/9/2019	HB	2.3	108.481	15.9485
CLC	Bai Chong-Bai Bim	BBi_O2_P1_G2.JPG	21/9/2019	1LC		108.515	15.9383
CLC	Hon Dai	HD_O6_P1_G2.JPG	17/9/2019	HB		108.481	15.9486
CLC	Bai Chong-Bai Bim	BBi_O1_P1_G51.JPG	21/9/2019	1LC		108.515	15.9383
CLC	Bai Chong-Bai Bim	BBi_DR_1_G5.JPG	21/9/2019	1LC		108.515	15.9383
CLC	Hon Dai	HD_O6_P1_G3.JPG	17/9/2019	HB		108.481	15.9486
CLC	SunGroup	Camera 360	21/9/2019	S		108.52	15.9365
CLC	Bai Chong-Bai Bim	BBi_O1_P1_G51.JPG	21/9/2019	1LC		108.515	15.9383
CLC	Hon Dai	HD_DR_70_G2.JPG	17/9/2019	4LC		108.482	15.9408
CLC	Bai Huong	BH_O5_G_G5.JPG	20/9/2019	2LC		108.53	15.9285
CLC	Bai Huong	BH_O6_P4_G3.JPG	20/9/2019	2LC		108.53	15.9289
CLC	Hon Dai	HD_O6_P1_G4.JPG	17/9/2019	HB		108.481	15.9486
CLC	Bai Huong	BH_DR_26_G2.JPG	20/9/2019	2LC		108.529	15.9295
CLC	Bai Chong-Bai Bim	BBi_DR_21_G2.JPG	21/9/2019	1LC		108.515	15.9383
CLC	Bai Chong-Bai Bim	BBi_DR_16_G5.JPG	21/9/2019	1LC		108.515	15.9384
CLC	Bai Ong	Camera 360	15/9/2019	S	3.3	108.494	15.9556
CLC	Hon Dai	HD_DR_61_G4.JPG	17/9/2019	4LC		108.483	15.9422
CLC	Hon Dai	HD_O6_P1_G5.JPG	17/9/2019	HB	6.1	108.481	15.9486
CLC	Bai Huong	BH_DR_26_G21.JPG	20/9/2019	2LC		108.529	15.9295
CLC	Hon Mo	HM_O7_P3_G3.JPG	16/9/2019	2LC		108.472	15.9319
CLC	Bai Chong-Bai Bim	BBi_O3_P3_G3.JPG	21/9/2019	1LC		108.516	15.9386
CLC	Bai Chong-Bai Bim	BBi_DR_18_G31.JPG	21/9/2019	1LC		108.516	15.9386
CLC	Bai Chong-Bai Bim	BBi_O3_P2_G2.JPG	21/9/2019	1LC		108.517	15.9387
CLC	Bai Huong	Camera 360	20/9/2019	S		108.527	15.9314
CLC	Hon Dai	HD_DR_35_G2.JPG	17/9/2019	4LC		108.485	15.9463
CLC	Hon Dai	HD_DR_34_G4.JPG	17/9/2019	4LC		108.485	15.9464
CLC	Hon Dai	HD_23_P2_G3.JPG	17/9/2019	1LC		108.482	15.9407
CLC	Hon Dai	HD_DR_84_G2.JPG	16/9/2019	1LC		108.477	15.9408
CLC	Hon Kho	HKM_O3_1_8_G5.JPG	12/9/2019	4LC		108.421	15.9726
CLC	Bai Chong-Bai Bim	Camera 360	21/9/2019	S		108.515	15.9382
CLC	Bai Lang -Bai Xep	Camera 360	22/9/2019	S		108.508	15.9499
CLC	Hon Dai	HD_DR_87_G1.JPG	16/9/2019	1LC		108.477	15.9411
CLC	SunGroup	SG_01_P1_G5.JPG	21/9/2019	4LC	1.9	108.522	15.9344
CLC	Hon Dai	HD_DR_87_G4.JPG	16/9/2019	1LC		108.477	15.9411
CLC	Hon Dai	HD_DR_87_G5.JPG	16/9/2019	1LC		108.477	15.9411
CLC	Hon Dai	HD_O9_G_G1.JPG	17/9/2019	HB		108.483	15.9485
CLC	Hon Dai	HD_20_P3_G1.JPG	17/9/2019	4LC		108.484	15.9433
CLC	Hon Mo	HM_O7_P2_G4.JPG	16/9/2019	2LC		108.472	15.9319
CLC	Bai Ong	Camera 360	15/9/2019	S		108.497	15.9585
CLC	Hon Mo	HM_O6_P4_G4.JPG	16/9/2019	2LC		108.476	15.9313
CLC	Hon Dai	HD_DR_87_G3.JPG	16/9/2019	1LC		108.477	15.9411
CLC	Hon Mo	HM_O6_P4_G2.JPG	16/9/2019	2LC		108.476	15.9313
CLC	Hon Mo	HM_O6_P4_G1.JPG	16/9/2019	2LC		108.475	15.9311
CLC	Hon Mo	HM_O6_G_G4.JPG	16/9/2019	2LC		108.476	15.9313
CLC	Hon Kho	HKM_O3_1_2_G5.JPG	12/9/2019	4LC		108.421	15.9728
CLC	Hon Kho	HKM_O3_1_2_G2.JPG	12/9/2019	4LC		108.421	15.9728
CLC	Bai Lang -Bai Xep	BX_O6_P1_G5.JPG	22/9/2019	3LC	2.7	108.508	15.9471
CLC	Bai Lang -Bai Xep	BX_O6_P2_G1.JPG	22/9/2019	3LC		108.508	15.9471
CLC	Bai Lang -Bai Xep	BX_O6_P2_G4.JPG	22/9/2019	3LC		108.508	15.9471
CLC	Bai Lang -Bai Xep	BX_O6_P2_G5.JPG	22/9/2019	3LC	4.1	108.508	15.9472
CLC	Bai Lang -Bai Xep	BX_O6_P2_G2.JPG	22/9/2019	3LC		108.508	15.9472
CLC	Bai Lang -Bai Xep	BX_O6_P2_G3.JPG	22/9/2019	3LC		108.508	15.9472
CLC	Hon dai		17/9/2019	D	22.5	108.478	15.9469
CLC	Hon Dai	HD_DR_87_G2.JPG	16/9/2019	1LC		108.477	15.9411
CLC	Hon Dai	HD_25_P1_G1.JPG	16/9/2019	1LC		108.477	15.9411
CLC	Hon Dai	HD_25_P5_G1.JPG	16/9/2019	1LC		108.477	15.9412
CLC	Hon Dai	HD_DR_92_G5.JPG	16/9/2019	1LC		108.477	15.9416
CLC	Hon Dai	HD_DR_93_G1.JPG	16/9/2019	1LC		108.477	15.9416
CLC	Hon Dai	HD_26_P5_G5.JPG	16/9/2019	1LC		108.477	15.9416
CLC	Hon Dai	HD_26_P4_G5.JPG	16/9/2019	1LC		108.477	15.9417
CLC	Hon Dai	HD_26_P3_G2.JPG	16/9/2019	1LC		108.477	15.9418
CLC	Hon Dai	HD_DR_94_G1.JPG	16/9/2019	1LC		108.477	15.9418
CLC	Hon Dai	HD_DR_94_G3.JPG	16/9/2019	1LC		108.477	15.9418
CLC	Hon Dai	HD_26_P3_G5.JPG	16/9/2019	1LC		108.477	15.9418
CLC	Hon Dai	HD_DR_97_G4.JPG	16/9/2019	1LC		108.477	15.942
CLC	Hon Dai	HD_DR_76_G51.JPG	17/9/2019	4LC		108.481	15.9393
CLC	Bai Chong-Bai Bim	Camera 360	21/9/2019	S		108.516	15.9383
CLC	Hon Dai	HD_27_P3_G1.JPG	16/9/2019	1LC		108.477	15.9422
CLC	Hon Dai	HD_DR_54_G4.JPG	17/9/2019	4LC		108.484	15.9436
CLC	Hon Dai	HD_DR_35_G5.JPG	17/9/2019	4LC	5.7	108.485	15.9463
CLC	Hon La	HLN_O1_2_4_G5.JPG	13/9/2019	4LC		108.443	15.9705
CLC	Hon Dai	HD_27_P3_G2.JPG	16/9/2019	1LC		108.477	15.9422
CLC	Hon La	HLN_O1_2_4_G3.JPG	13/9/2019	4LC		108.443	15.9706
CLC	Hon Kho	HKM_O3_1_2_G4.JPG	12/9/2019	4LC		108.421	15.9728
CLC	Hon Kho	HKC_03_P5_G3.JPG	12/9/2019	HB	5.3	108.417	15.9723
CLC	Hon Dai	HD_DR_70_G5.JPG	17/9/2019	4LC	6.3	108.482	15.9408
CLC	Hon Dai	HD_27_P3_G5.JPG	16/9/2019	1LC		108.477	15.9422
CLC	Hon Dai	HD_DR_60_G1.JPG	17/9/2019	4LC		108.484	15.9424
CLC	Hon Dai	HD_27_P3_G3.JPG	16/9/2019	1LC		108.477	15.9423
CLC	Hon dai		17/9/2019	D	18.5	108.486	15.948
CLC	Hon Dai	HD_DR_100_G4.JPG	16/9/2019	1LC		108.477	15.9423
CLC	Hon Dai	HD_DR_101_G2.JPG	16/9/2019	1LC		108.477	15.9423
CLC	Bai Chong-Bai Bim	BC_02_P2_G12.JPG	22/9/2019	1LC		108.509	15.9433
CLC	Bai Chong-Bai Bim	BC_02_P2_G11.JPG	22/9/2019	1LC		108.509	15.9433
CLC	Hon Mo	HM_O6_G_G3.JPG	16/9/2019	2LC		108.476	15.9313
CLC	Hon Dai	HD_DR_32_G2.JPG	17/9/2019	4LC	8.6	108.485	15.9465
CLC	Hon Kho	HKC_DR_1_G5.JPG	12/9/2019	HB	8.8	108.417	15.9718
CLC	Bai Chong-Bai Bim	BC_02_P2_G10.JPG	22/9/2019	1LC		108.509	15.9433
CLC	Bai Chong-Bai Bim	BC_02_P2_G1.JPG	22/9/2019	1LC		108.509	15.9434
CLC	Hon Dai	HD_DR_56_G1.JPG	17/9/2019	1LC		108.484	15.9431
CLC	Bai Chong-Bai Bim	Camera 360	21/9/2019	S		108.512	15.9423
CLC	Bai Chong-Bai Bim	BC_DR_10_G31.JPG	22/9/2019	1LC		108.509	15.9435
CLC	Hon La	HLN_O5_P3_G4.JPG	13/9/2019	4LC	3.1	108.447	15.9674
CLC	Bai Ong	Camera 360	15/9/2019	S		108.495	15.9555
CLC	Bai Chong-Bai Bim	BC_DR_10_G3.JPG	22/9/2019	1LC		108.509	15.9435
CLC	Hon Kho	HKM_O3_1_8_G2.JPG	12/9/2019	4LC		108.421	15.9727
CLC	Hon Tai		18/9/2019	D		108.53	15.9062
CLC	Bai Chong-Bai Bim	BC_DR_10_G31.JPG	22/9/2019	1LC		108.509	15.9435
CLC	Bai Chong-Bai Bim	BC_DR_10_G32.JPG	22/9/2019	1LC		108.509	15.9435
CLC	SunGroup	SG_01_P3_G5.JPG	21/9/2019	HB	2.8	108.523	15.9333
CLC	Bai Chong-Bai Bim	BC_DR_10_G3.JPG	22/9/2019	1LC		108.509	15.9435
CLC	Hon Dai	HD_DR_55_G1.JPG	17/9/2019	1LC		108.484	15.9435
CLC	Hon Kho	HKC_DR_2_G1.JPG	12/9/2019	HB		108.417	15.9718
CLC	Hon Tai	HT_O8_P4_G2.JPG	18/9/2019	1LC		108.532	15.9058
CLC	Hon Tai	HT_O8_P4_G3.JPG	18/9/2019	1LC		108.532	15.9058
CLC	Hon Tai	HT_O8_P4_G4.JPG	18/9/2019	1LC		108.532	15.9058
CLC	Bai Ong	Camera 360	15/9/2019	S	3.3	108.494	15.9556
CLC	Hon Kho	HKC_DR_2_G31.JPG	12/9/2019	HB		108.417	15.9718
CLC	Hon Dai	HD_DR_51_G1.JPG	17/9/2019	1LC		108.484	15.9442
CLC	Hon Kho	HKC_DR_2_G3.JPG	12/9/2019	HB		108.417	15.9718
CLC	Bai Ong	Camera 360	15/9/2019	S		108.495	15.9555
CLC	Hon Kho	HKC_DR_2_G4.JPG	12/9/2019	HB		108.417	15.9718
CLC	Bai Chong-Bai Bim	BX_DR_67_G1.JPG	22/9/2019	1LC		108.507	15.9445
CLC	Bai Huong	Camera 360	20/9/2019	S		108.527	15.9313
CLC	Bai Chong-Bai Bim	Camera 360	21/9/2019	S		108.512	15.9416
CLC	Hon Dai	HD_DR_49_G3.JPG	17/9/2019	1LC		108.484	15.9444
CLC	Hon Dai	HD_DR_49_G22.JPG	17/9/2019	1LC		108.484	15.9444
CLC	Hon Mo	HM_O4_P2_G5.JPG	16/9/2019	2LC		108.477	15.932
CLC	Hon Dai	HD_O1_P2_G5.JPG	17/9/2019	1LC		108.477	15.9446
CLC	Hon Mo	HM_O4_G_G1.JPG	16/9/2019	2LC		108.477	15.9319
CLC	Hon Dai	HD_O1_P4_G5.JPG	17/9/2019	1LC		108.477	15.9446
CLC	Hon Dai	HD_DR_47_G3.JPG	17/9/2019	1LC		108.484	15.9447
CLC	Hon Dai	HD_DR_47_G2.JPG	17/9/2019	1LC		108.485	15.9447
CLC	Hon Kho	HKC_DR_2_G5.JPG	12/9/2019	HB		108.417	15.9719
CLC	Hon Dai	HD_O1_P1_G5.JPG	17/9/2019	1LC		108.477	15.9447
CLC	Hon Dai	HD_DR_4_G4.JPG	17/9/2019	1LC		108.478	15.9451
CLC	Hon Tai	HT_O9_G_G1.JPG	18/9/2019	1LC		108.532	15.906
CLC	Hon Dai	HD_DR_4_G21.JPG	17/9/2019	1LC		108.478	15.9451
CLC	Bai Lang -Bai Xep	BX_O9_P4_G3.JPG	22/9/2019	1LC		108.508	15.9456
CLC	Bai Lang -Bai Xep	BX_O9_P3_G1.JPG	22/9/2019	1LC		108.508	15.9456
CLC	Bai Lang -Bai Xep	BX_O9_P3_G2.JPG	22/9/2019	1LC		108.508	15.9456
CLC	Hon Dai	HD_DR_8_G2.JPG	17/9/2019	1LC		108.478	15.9456
CLC	Hon La	HLN_O1_2_5_G5.JPG	13/9/2019	4LC		108.443	15.9705
CLC	Hon dai		17/9/2019	D	14.5	108.486	15.9487
CLC	Hon Dai	HD_14_P1_G2.JPG	17/9/2019	1LC		108.485	15.9459
CLC	Hon Dai	HD_14_P3_G3.JPG	17/9/2019	1LC		108.485	15.9459
CLC	Hon Kho	HKC_O1_3_1_G3.JPG	12/9/2019	HB	3.2	108.418	15.9721
CLC	Hon Dai	HD_14_P2_G2.JPG	17/9/2019	1LC		108.485	15.9459
CLC	Hon Dai	HD_14_P2_G3.JPG	17/9/2019	1LC		108.485	15.9459
CLC	Hon Kho	HKC_O2_1_2_G3.JPG	12/9/2019	HB		108.418	15.973
CLC	Hon Kho	HKC_O2_1_2_G4.JPG	12/9/2019	HB		108.418	15.9729
CLC	Hon Mo	HM_O2_P4_G2.JPG	16/9/2019	2LC		108.475	15.9334
CLC	Hon Dai	HD_16_P3_G1.JPG	17/9/2019	4LC		108.484	15.9452
CLC	Hon Dai	HD_DR_44_G1.JPG	17/9/2019	4LC		108.485	15.9452
CLC	Hon Dai	HD_13_P3_G4.JPG	17/9/2019	1LC		108.484	15.9459
CLC	Hon Dai	HD_O3_P2_G2.JPG	17/9/2019	1LC		108.478	15.946
CLC	Hon Dai	HD_O3_P2_G3.JPG	17/9/2019	1LC		108.478	15.946
CLC	Hon Mo	HM_O2_P3_G2.JPG	16/9/2019	2LC		108.475	15.9334
CLC	Hon Mo	HM_O1_P4_G4.JPG	16/9/2019	2LC		108.474	15.9336
CLC	Hon Dai	HD_O3_G_G1.JPG	17/9/2019	1LC		108.478	15.946
CLC	Hon Dai	HD_O3_P3_G1.JPG	17/9/2019	1LC		108.478	15.946
CLC	Hon Dai	HD_O3_G_G4.JPG	17/9/2019	1LC		108.478	15.946
CLC	Hon Dai	HD_DR_44_G5.JPG	17/9/2019	4LC	6.3	108.485	15.9452
CLC	Hon Dai	HD_O3_P3_G3.JPG	17/9/2019	1LC		108.478	15.9461
CLC	Hon Mo	HM_O1_P4_G3.JPG	16/9/2019	2LC		108.474	15.9337
CLC	Hon Kho	HKC_O2_1_2_G5.JPG	12/9/2019	HB		108.418	15.973
CLC	Hon Dai	HD_O3_P4_G1.JPG	17/9/2019	1LC		108.478	15.9461
CLC	Hon Dai	HD_O3_P4_G3.JPG	17/9/2019	1LC		108.478	15.9461
CLC	Hon Dai	HD_O3_P4_G2.JPG	17/9/2019	1LC		108.478	15.9461
CLC	Hon Dai	HD_DR_11_G3.JPG	17/9/2019	1LC		108.478	15.9463
CLC	Bai Lang -Bai Xep	BX_DR_51_G1.JPG	22/9/2019	1LC		108.508	15.9467
CLC	Hon Mo	HM_O1_P4_G2.JPG	16/9/2019	2LC		108.474	15.9337
CLC	Hon Mo	HM_O1_P4_G1.JPG	16/9/2019	2LC		108.474	15.9336
CLC	Bai Lang -Bai Xep	BX_DR_51_G5.JPG	22/9/2019	1LC		108.508	15.9467
CLC	Bai Lang -Bai Xep	BX_DR_51_G2.JPG	22/9/2019	1LC		108.508	15.9467
CLC	Hon Tai	HT_O6_P4_G1.JPG	18/9/2019	2LC		108.532	15.9053
CLC	Bai Lang -Bai Xep	BX_DR_51_G3.JPG	22/9/2019	1LC		108.508	15.9467
CLC	Hon Dai	HD_O4_P2_G1.JPG	17/9/2019	1LC		108.478	15.9465
CLC	Hon Tai	HT_O6_P4_G2.JPG	18/9/2019	2LC		108.532	15.9054
CLC	Hon Tai	HT_O6_P4_G3.JPG	18/9/2019	2LC		108.532	15.9054
CLC	Hon Dai	HD_O4_P2_G4.JPG	17/9/2019	1LC		108.478	15.9465
CLC	Hon Tai	HT_O7_G_G2.JPG	18/9/2019	2LC		108.532	15.9054
CLC	Hon Dai	HD_O4_P2_G2.JPG	17/9/2019	1LC		108.478	15.9465
CLC	Hon Dai	HD_O4_P2_G3.JPG	17/9/2019	1LC		108.478	15.9465
CLC	Hon Tai	HT_O7_G_G5.JPG	18/9/2019	2LC		108.532	15.9054
CLC	Hon Tai	HT_O7_P1_G1.JPG	18/9/2019	2LC		108.532	15.9054
CLC	Hon Tai	HT_O7_P1_G2.JPG	18/9/2019	2LC		108.532	15.9054
CLC			22/9/2019	D	14	108.506	15.9493
CLC			17/9/2019	D	18	108.487	15.9491
CLC	SunGroup	SG_01_P1_G4.JPG	21/9/2019	1LC		108.523	15.9334
CLC	Bai Lang -Bai Xep	BX_O7_P3_G1.JPG	22/9/2019	1LC		108.508	15.9469
CLC	Hon Dai	HD_DR_14_G2.JPG	17/9/2019	1LC		108.479	15.947
CLC	Hon Dai	HD_DR_13_G1.JPG	17/9/2019	1LC		108.479	15.9471
CLC	Hon Dai	HD_DR_13_G4.JPG	17/9/2019	1LC		108.479	15.9471
CLC	Hon dai		17/9/2019	D		108.479	15.9492
CLC	Hon dai		17/9/2019	D		108.479	15.9492
CLC	Hon dai		17/9/2019	D	21.8	108.479	15.9492
CLC			17/9/2019	D		108.487	15.9493
CLC	Hon Dai		17/9/2019	D	18.8	108.481	15.9493
CLC			17/9/2019	D		108.487	15.9493
CLC	Hon dai		17/9/2019	D		108.479	15.9493
CLC	Hon dai		17/9/2019	D	26	108.479	15.9494
CLC	Hon dai		17/9/2019	D		108.479	15.9494
CLC			17/9/2019	D		108.487	15.9496
CLC	Hon Mo	HM_DR_15_G1.JPG	16/9/2019	4LC		108.472	15.9308
CLC			17/9/2019	D		108.487	15.9496
CLC	Hon Mo	HM_DR_14_G5.JPG	16/9/2019	3LC	6.3	108.472	15.931
CLC	Hon Mo	HM_DR_14_G4.JPG	16/9/2019	3LC		108.472	15.931
CLC	Hon Dai	HD_DR_36_G2.JPG	17/9/2019	4LC	7.2	108.485	15.9462
CLC	Hon Dai	HD_DR_34_G1.JPG	17/9/2019	4LC		108.485	15.9464
CLC	Bai Chong-Bai Bim	Camera 360	21/9/2019	S		108.516	15.938
CLC	Hon Kho	HKM_O1_2_1_G5.JPG	12/9/2019	4LC		108.422	15.9722
CLC	Bai Lang -Bai Xep		22/9/2019	D	14	108.508	15.9505
CLC	Bai Chong-Bai Bim	BBi_O2_P1_G5.JPG	21/9/2019	2LC		108.515	15.9384
CLC	Bai Chong-Bai Bim	BBi_DR_11_G5.JPG	21/9/2019	2LC		108.515	15.9384
CLC	Bai Chong-Bai Bim	BBi_O4_P2_G2.JPG	21/9/2019	2LC		108.516	15.9384
CLC	Bai Chong-Bai Bim	BBi_O4_P2_G5.JPG	21/9/2019	2LC		108.516	15.9385
CLC	Bai Chong-Bai Bim	BBi_DR_2_G5.JPG	21/9/2019	2LC		108.516	15.9385
CLC	Bai Chong-Bai Bim	BBi_DR_23_G1.JPG	21/9/2019	2LC		108.516	15.9385
CLC	Hon Mo	HM_DR_14_G3.JPG	16/9/2019	3LC		108.472	15.9311
CLC	Hon Dai	HD_DR_13_G5.JPG	17/9/2019	1LC		108.479	15.9471
CLC	Hon Kho	HKC_O2_1_3_G3.JPG	12/9/2019	HB		108.418	15.973
CLC	Hon Dai	HD_DR_81_G41.JPG	17/9/2019	2LC		108.48	15.9382
CLC	Hon Dai	HD_DR_13_G2.JPG	17/9/2019	1LC		108.479	15.9471
CLC	Hon Kho	HKM_O1_2_1_G1.JPG	12/9/2019	4LC		108.422	15.9722
CLC	Hon Kho	HKC_O2_1_3_G4.JPG	12/9/2019	HB		108.418	15.9729
CLC	Hon Dai	HD_DR_81_G42.JPG	17/9/2019	2LC		108.48	15.9382
CLC	Hon Mo	HM_DR_14_G2.JPG	16/9/2019	3LC		108.472	15.9311
CLC	Bai Chong-Bai Bim	Camera 360	21/9/2019	S		108.515	15.9382
CLC	Hon Dai	HD_DR_76_G52.JPG	17/9/2019	4LC	5.3	108.481	15.9393
CLC	Bai Lang -Bai Xep	BX_O2_G_G2.JPG	22/9/2019	3LC		108.508	15.9524
CLC	Hon Dai	HD_DR_76_G2.JPG	17/9/2019	4LC		108.481	15.9393
CLC	Hon Dai	HD_DR_56_G2.JPG	17/9/2019	4LC		108.484	15.9432
CLC	Hon Dai	HD_16_P3_G5.JPG	17/9/2019	4LC	6	108.484	15.9452
CLC	Hon Dai	HD_DR_35_G3.JPG	17/9/2019	4LC		108.485	15.9463
CLC	Hon Kho	HKC_O2_2_1_G1.JPG	12/9/2019	HB		108.418	15.9731
CLC	Hon Dai	HD_DR_81_G43.JPG	17/9/2019	2LC		108.48	15.9382
CLC	Hon Dai	HD_DR_81_G44.JPG	17/9/2019	2LC		108.48	15.9382
CLC	Hon Dai	HD_DR_81_G4.JPG	17/9/2019	2LC		108.48	15.9382
CLC	Hon Dai	HD_DR_81_G1.JPG	17/9/2019	2LC		108.481	15.9383
CLC	Hon Dai	HD_DR_81_G12.JPG	17/9/2019	2LC		108.481	15.9383
CLC	Hon Kho	HKC_O2_2_1_G3.JPG	12/9/2019	HB		108.418	15.9732
CLC	Bai Ong	Camera 360	15/9/2019	S		108.498	15.9591
CLC	Hon Kho	HKC_O2_3_2_G1.JPG	12/9/2019	HB		108.418	15.9732
CLC	Bai Huong	Camera 360	20/9/2019	S		108.528	15.9305
CLC	Bai Chong-Bai Bim	Camera 360	22/9/2019	S		108.508	15.9439
CLC	Bac CLC	Camera 360	14/9/2019	S		108.49	15.968
CLC	Bac CLC	Camera 360	14/9/2019	S		108.49	15.9681
CLC	Bai Lang -Bai Xep	Camera 360	22/9/2019	S		108.508	15.9498
CLC	Hon Dai	HD_DR_58_G2.JPG	17/9/2019	4LC		108.484	15.9426
CLC	Hon Dai	HD_20_P3_G5.JPG	17/9/2019	4LC	6.8	108.484	15.9433
CLC	Bai Lang -Bai Xep	BX_O5_P3_G1.JPG	22/9/2019	4LC		108.508	15.9477
CLC	Bai Lang -Bai Xep	BX_O5_P3_G2.JPG	22/9/2019	4LC		108.508	15.9477
CLC			15/9/2019	D	15.1	108.493	15.9548
CLC			22/9/2019	D	14.1	108.504	15.9551
CLC	Hon Mo	HM_DR_14_G1.JPG	16/9/2019	3LC		108.472	15.931
CLC	Hon Dai	HD_DR_15_G1.JPG	17/9/2019	1LC		108.479	15.9471
CLC	SunGroup	SG_01_P5_G5.JPG	21/9/2019	3LC	2.4	108.523	15.9333
CLC	Hon Kho	HKC_O2_3_2_G2.JPG	12/9/2019	HB	6.7	108.418	15.9732
CLC	Hon Kho	HKC_O2_3_2_G4.JPG	12/9/2019	HB		108.418	15.9731
CLC	Hon Kho	HKC_O2_3_2_G5.JPG	12/9/2019	HB		108.418	15.9732
CLC	SunGroup	SG_02_P1_G5.JPG	21/9/2019	HB	3.1	108.523	15.933
CLC	SunGroup	SG_02_P3_G1.JPG	21/9/2019	4LC		108.523	15.9329
CLC			15/9/2019	D	14	108.492	15.9554
CLC	SunGroup	SG_02_P3_G2.JPG	21/9/2019	4LC		108.523	15.9329
CLC	Bai Huong	Camera 360	20/9/2019	S		108.527	15.9314
CLC	Hon La	HLN_O3_2_4_G1.JPG	13/9/2019	4LC		108.445	15.9688
CLC	Hon La	HLN_O3_2_5_G5.JPG	13/9/2019	4LC		108.445	15.9688
CLC	Bai Huong	Camera 360	20/9/2019	S		108.527	15.9315
CLC	Hon Kho	HKC_O2_3_3_G3.JPG	12/9/2019	HB		108.418	15.9732
CLC	Hon Kho	HKM_O1_2_2_G5.JPG	12/9/2019	4LC		108.422	15.9722
CLC	Hon Kho	HKM_O1_3_9_G4.JPG	12/9/2019	4LC		108.422	15.9722
CLC	Bai Ong	Camera 360	15/9/2019	S	3.3	108.494	15.9556
CLC	Hon Dai	HD_DR_81_G1.JPG	17/9/2019	2LC		108.481	15.9384
CLC	SunGroup	SG_02_P3_G4.JPG	21/9/2019	4LC		108.523	15.9329
CLC	Bai Chong-Bai Bim	BBi_DR_17_G5.JPG	21/9/2019	4LC	3	108.515	15.9383
CLC	Hon Dai	HD_20_P3_G4.JPG	17/9/2019	4LC		108.484	15.9433
CLC	Hon Kho	HKC_O2_3_3_G4.JPG	12/9/2019	HB		108.418	15.9731
CLC	Bai Ong	BO_O3_P3_G2.JPG	15/9/2019	3LC		108.495	15.9556
CLC	Bai Chong-Bai Bim	Camera 360	21/9/2019	S		108.516	15.9382
CLC	Bai Ong	BO_O3_P4_G3.JPG	15/9/2019	3LC		108.495	15.9556
CLC	Bai Ong	BO_O3_P4_G1.JPG	15/9/2019	3LC	5	108.495	15.9556
CLC	Hon Dai	HD_DR_63_G2.JPG	17/9/2019	4LC		108.483	15.942
CLC	Hon Dai	HD_DR_60_G4.JPG	17/9/2019	4LC		108.484	15.9424
CLC	Hon Dai	HD_DR_77_G4.JPG	17/9/2019	2LC		108.481	15.9391
CLC	Bai Ong	BO_O3_P4_G5.JPG	15/9/2019	3LC		108.495	15.9556
CLC	Bai Ong	BO_O2_P1_G1.JPG	15/9/2019	3LC	3.5	108.495	15.9556
CLC	Bai Ong	BO_O2_P4_G2.JPG	15/9/2019	3LC	4.5	108.495	15.9556
CLC	Bai Ong	BO_O3_P4_G1.JPG	15/9/2019	3LC	5	108.495	15.9556
CLC	Hon Dai	HD_DR_77_G1.JPG	17/9/2019	2LC		108.481	15.9391
CLC	Bai Ong	BO_O2_P1_G2.JPG	15/9/2019	3LC		108.495	15.9556
CLC	Hon Dai	HD_DR_77_G2.JPG	17/9/2019	2LC		108.481	15.9391
CLC	Hon Dai	HD_DR_77_G3.JPG	17/9/2019	2LC		108.481	15.9391
CLC	Bai Ong	BO_O2_P1_G1.JPG	15/9/2019	3LC	3.5	108.495	15.9557
CLC	Bai Ong	BO_O2_P1_G5.JPG	15/9/2019	3LC		108.495	15.9557
CLC	Bai Ong	BO_O5_P1_G1.JPG	15/9/2019	3LC	5.6	108.495	15.9557
CLC	Hon Tai	HT_O7_P1_G3.JPG	18/9/2019	2LC		108.532	15.9054
CLC	Bai Ong	BO_O2_P1_G4.JPG	15/9/2019	3LC		108.495	15.9557
CLC	Hon Kho	HKC_O2_3_3_G5.JPG	12/9/2019	HB	6.9	108.418	15.9731
CLC	Hon Tai	HT_O7_P1_G4.JPG	18/9/2019	2LC		108.532	15.9054
CLC	Hon Tai	HT_O7_P2_G2.JPG	18/9/2019	2LC		108.532	15.9054
CLC	Bai Ong	BO_O6_P1_G5.JPG	15/9/2019	3LC		108.496	15.9558
CLC	Bai Ong	BO_O6_P1_G4.JPG	15/9/2019	3LC		108.496	15.9558
CLC	Hon Tai	HT_O7_P2_G3.JPG	18/9/2019	2LC		108.532	15.9054
CLC	Hon Dai	HD_23_G_G2.JPG	17/9/2019	2LC		108.482	15.9407
CLC	Hon Dai	HD_23_P1_G1.JPG	17/9/2019	2LC		108.482	15.9407
CLC	Bai Ong	BO_O6_P1_G2.JPG	15/9/2019	3LC	4.8	108.496	15.9558
CLC	Hon Dai	HD_23_P2_G2.JPG	17/9/2019	2LC		108.482	15.9407
CLC	Hon Tai	HT_O7_P2_G5.JPG	18/9/2019	2LC		108.532	15.9054
CLC	Bai Ong	BO_O6_G_G1.JPG	15/9/2019	3LC		108.496	15.9558
CLC	Bai Ong	BO_O6_G_G3.JPG	15/9/2019	3LC		108.496	15.9558
CLC	Hon Kho	HKM_O1_3_9_G2.JPG	12/9/2019	HB		108.422	15.9721
CLC	Bai Ong	BO_O7_P1_G2.JPG	15/9/2019	3LC	5.9	108.496	15.9559
CLC	Hon Kho	HKM_O2_2_1_G3.JPG	12/9/2019	HB		108.422	15.9722
CLC	Hon La	HLD_DR_1_G2.JPG	13/9/2019	HB		108.447	15.9763
CLC	Hon Dai	HD_23_P1_G2.JPG	17/9/2019	2LC		108.482	15.9407
CLC	Hon Tai	HT_O7_P3_G5.JPG	18/9/2019	2LC		108.532	15.9055
CLC	Hon Dai	HD_DR_85_G1.JPG	16/9/2019	2LC		108.477	15.9409
CLC	Hon Dai	HD_DR_90_G4.JPG	16/9/2019	2LC		108.477	15.9414
CLC	Hon Dai	HD_22_P1_G1.JPG	17/9/2019	2LC		108.483	15.9416
CLC	Hon Dai	HD_22_P3_G2.JPG	17/9/2019	2LC		108.483	15.9416
CLC	Bai Ong	BO_O8_P1_G1.JPG	15/9/2019	3LC		108.496	15.956
CLC	Hon Dai	HD_DR_76_G1.JPG	17/9/2019	4LC		108.481	15.9393
CLC	Bai Ong	BO_O8_P2_G1.JPG	15/9/2019	3LC		108.496	15.956
CLC	Bai Ong	BO_O8_G_G1.JPG	15/9/2019	3LC		108.496	15.956
CLC	Hon Dai	HD_DR_75_G4.JPG	17/9/2019	4LC		108.482	15.9395
CLC	Bai Ong	BO_O9_P4_G5.JPG	15/9/2019	3LC	7.1	108.496	15.9561
CLC	Bai Ong	BO_O9_P1_G1.JPG	15/9/2019	3LC	5.9	108.496	15.9561
CLC	Bai Ong	BO_O9_G_G5.JPG	15/9/2019	3LC	6.9	108.496	15.9561
CLC	Bai Ong	BO_O9_G_G2.JPG	15/9/2019	3LC		108.496	15.9561
CLC	Hon Tai	HT_O7_P4_G1.JPG	18/9/2019	2LC		108.532	15.9055
CLC	Hon Tai	HT_O7_P4_G3.JPG	18/9/2019	2LC		108.532	15.9055
CLC	Bai Ong	BO_10_P1_G1.JPG	15/9/2019	3LC		108.496	15.9562
CLC	Bai Ong	BO_10_P1_G5.JPG	15/9/2019	3LC		108.496	15.9562
CLC	Hon Dai	HD_DR_56_G4.JPG	17/9/2019	2LC		108.484	15.9432
CLC	Bai Ong	BO_O9_P3_G5.JPG	15/9/2019	3LC	5.6	108.496	15.9562
CLC	Bai Chong-Bai Bim	BC_DR_03_G3.JPG	22/9/2019	2LC		108.509	15.9436
CLC	Bai Chong-Bai Bim	BC_DR_01_G51.JPG	22/9/2019	2LC		108.509	15.9436
CLC	Bai Ong	BO_10_G_G5.JPG	15/9/2019	3LC	5.9	108.496	15.9563
CLC	Bai Ong	BO_10_P3_G5.JPG	15/9/2019	3LC	6.4	108.496	15.9563
CLC	Bai Ong	BO_10_P4_G5.JPG	15/9/2019	3LC	5.6	108.496	15.9564
CLC	Bai Chong-Bai Bim	BC_DR_01_G1.JPG	22/9/2019	2LC		108.508	15.9436
CLC	Bai Chong-Bai Bim	BC_DR_01_G52.JPG	22/9/2019	2LC		108.509	15.9437
CLC	Bai Chong-Bai Bim	BC_DR_01_G5.JPG	22/9/2019	2LC		108.508	15.9437
CLC	Bai Chong-Bai Bim	BC_01_P3_G3.JPG	22/9/2019	2LC		108.509	15.9437
CLC	Bai Chong-Bai Bim	BC_DR_01_G2.JPG	22/9/2019	2LC		108.509	15.9437
CLC	Bai Ong	Camera 360	15/9/2019	S		108.498	15.9594
CLC	SunGroup	SG_02_P3_G5.JPG	21/9/2019	4LC	4.5	108.523	15.9329
CLC	Hon Dai	HD_DR_52_G5.JPG	17/9/2019	2LC		108.484	15.9439
CLC	Bai Ong	BO_12_G_G5.JPG	15/9/2019	3LC	4.9	108.497	15.9567
CLC	Hon Dai	HD_DR_52_G1.JPG	17/9/2019	2LC		108.484	15.9439
CLC	Hon Dai	HD_DR_52_G52.JPG	17/9/2019	2LC		108.484	15.944
CLC	Hon Dai	HD_DR_52_G2.JPG	17/9/2019	2LC		108.484	15.944
CLC	Hon Dai	HD_DR_49_G2.JPG	17/9/2019	2LC		108.484	15.9444
CLC	Hon Dai	HD_DR_46_G1.JPG	17/9/2019	2LC		108.485	15.9449
CLC	Hon Dai	HD_DR_46_G4.JPG	17/9/2019	2LC		108.485	15.9449
CLC	Hon Dai	HD_DR_46_G2x.JPG	17/9/2019	2LC		108.485	15.9449
CLC	Hon Dai	HD_DR_3_G2.JPG	17/9/2019	2LC		108.478	15.9451
CLC	SunGroup	SG_02_P4_G3.JPG	21/9/2019	4LC		108.523	15.9329
CLC	Hon Dai	HD_DR_3_G3.JPG	17/9/2019	2LC		108.478	15.9451
CLC	Hon Dai	HD_DR_44_G2.JPG	17/9/2019	4LC		108.485	15.9452
CLC	Hon Dai	HD_DR_5_G2.JPG	17/9/2019	2LC		108.478	15.9451
CLC	Bai Chong-Bai Bim	Camera 360	21/9/2019	S		108.516	15.9383
CLC	Hon Dai	HD_DR_34_G5.JPG	17/9/2019	4LC	4.5	108.485	15.9464
CLC	Hon La	HLD_O2_P4_G5.JPG	13/9/2019	HB		108.445	15.9757
CLC	Hon Tai	HT_O9_G_G2.JPG	18/9/2019	2LC		108.532	15.906
CLC	Hon Tai	HT_O9_G_G3.JPG	18/9/2019	2LC		108.532	15.906
CLC	Bai Lang -Bai Xep	BX_O9_P2_G4.JPG	22/9/2019	2LC		108.508	15.9456
CLC	Bai Lang -Bai Xep	BX_O9_P2_G3.JPG	22/9/2019	2LC		108.508	15.9456
CLC	Bai Lang -Bai Xep	BX_O9_P2_G1.JPG	22/9/2019	2LC		108.508	15.9457
CLC	Hon Tai		18/9/2019	D		108.53	15.9064
CLC	Hon La	HLN_DR_2_G5.JPG	13/9/2019	HB	8.3	108.443	15.9705
CLC	Bai Chong-Bai Bim	Camera 360	21/9/2019	S		108.516	15.9383
CLC	Bai Lang -Bai Xep	BX_O9_P2_G2.JPG	22/9/2019	2LC		108.508	15.9457
CLC	SunGroup	SG_DR_01_G1.JPG	21/9/2019	4LC		108.523	15.9334
CLC	Bai Ong	Camera 360	15/9/2019	S		108.494	15.9556
CLC	Hon Dai	HD_DR_15_G4.JPG	17/9/2019	1LC		108.479	15.9471
CLC	Hon Dai	HD_DR_15_G3.JPG	17/9/2019	1LC		108.479	15.9472
CLC	Hon Dai	HD_DR_15_G2.JPG	17/9/2019	1LC		108.479	15.9472
CLC	Hon Dai	HD_DR_16_G2.JPG	17/9/2019	1LC		108.479	15.9473
CLC	Bai Lang -Bai Xep	BX_DR_34_G1.JPG	22/9/2019	1LC		108.508	15.9479
CLC	Hon Dai	HD_DR_75_G2.JPG	17/9/2019	4LC		108.482	15.9395
CLC	Hon La	HLN_O1_1_10_G4.JPG	13/9/2019	HB		108.443	15.9706
CLC	Hon Dai	HD_DR_18_G4.JPG	17/9/2019	1LC		108.479	15.9478
CLC	Hon Dai	HD_DR_8_G4.JPG	17/9/2019	2LC		108.478	15.9455
CLC	Hon Dai	HD_DR_10_G1.JPG	17/9/2019	2LC		108.478	15.9457
CLC	Hon Dai	HD_DR_10_G2.JPG	17/9/2019	2LC		108.478	15.9457
CLC			15/9/2019	D	14	108.498	15.9581
CLC	Hon Dai	HD_DR_10_G3.JPG	17/9/2019	2LC		108.478	15.9457
CLC	Bai Lang -Bai Xep	BX_O8_P3_G3.JPG	22/9/2019	2LC		108.508	15.9461
CLC	Hon Dai	HD_DR_18_G2.JPG	17/9/2019	1LC		108.479	15.9479
CLC	Hon Dai	HD_DR_19_G1.JPG	17/9/2019	1LC		108.48	15.9481
CLC	Hon La	HLN_O1_1_5_G1.JPG	13/9/2019	HB		108.443	15.9705
CLC	Hon Dai	HD_DR_19_G4.JPG	17/9/2019	1LC		108.48	15.9481
CLC	Hon Dai	HD_DR_19_G2.JPG	17/9/2019	1LC		108.48	15.9481
CLC	Hon Dai	HD_O5_P3_G1.JPG	17/9/2019	1LC		108.481	15.9484
CLC	Hon Tai		18/9/2019	D	28	108.531	15.9064
CLC	Bai Huong	BH_DR_4_G5.JPG	20/9/2019	4LC	4.2	108.53	15.9269
CLC	Bai Chong-Bai Bim	Camera 360	21/9/2019	S		108.515	15.9382
CLC	Bai Ong	Camera 360	15/9/2019	S		108.494	15.9555
CLC	Bai Ong	Camera 360	15/9/2019	S		108.497	15.9593
CLC	SunGroup	SG_DR_01_G2.JPG	21/9/2019	4LC		108.523	15.9334
CLC	Bai Lang -Bai Xep	Camera 360	22/9/2019	S		108.507	15.9525
CLC	Hon La	HLN_O5_G_G5.JPG	13/9/2019	HB	5.4	108.446	15.9673
CLC	Hon Kho	HKM_O1_3_9_G5.JPG	12/9/2019	4LC		108.422	15.9722
CLC	Bai Bac	BB_24_P4_G2.JPG	15/9/2019	3LC		108.49	15.959
CLC	Bai Bac	BB_24_P4_G1.JPG	15/9/2019	3LC		108.49	15.959
CLC	Hon Dai	HD_O5_P3_G4.JPG	17/9/2019	1LC		108.481	15.9484
CLC	Bai Bac	BB_24_P4_G5.JPG	15/9/2019	3LC	2.8	108.49	15.9591
CLC	Bai Bac	BB_24_P4_G3.JPG	15/9/2019	3LC		108.49	15.9591
CLC	Hon Dai	HD_O5_P3_G5.JPG	17/9/2019	1LC		108.481	15.9484
CLC	Hon Kho	HKC_O1_1_5_G5.JPG	12/9/2019	4LC		108.418	15.9721
CLC	Bai Bac	BB_24_P1_G5.JPG	15/9/2019	3LC	2.7	108.49	15.9591
CLC	Hon Kho	HKM_O1_3_10_G5.JPG	12/9/2019	4LC		108.422	15.9722
CLC	Hon La	Camera 360	13/9/2019	S		108.445	15.9683
CLC	Hon Tai		18/9/2019	D		108.531	15.9064
CLC	Bai Huong	BH_DR_4_G2.JPG	20/9/2019	4LC		108.53	15.9268
CLC	Bai Lang -Bai Xep	Camera 360	22/9/2019	S		108.508	15.9499
CLC	Hon Dai	HD_DR_60_G5.JPG	17/9/2019	4LC	8.4	108.484	15.9425
CLC	Hon Dai	HD_O7_P3_G1.JPG	17/9/2019	1LC		108.482	15.9485
CLC	Hon La	HLN1_02_P5_G5.JPG	13/9/2019	HB	4.6	108.451	15.9729
CLC	Hon La	HLN1_DR_03_G5.JPG	13/9/2019	HB	3.1	108.448	15.9672
CLC	Bai Bac	Camera 360	15/9/2019	S	0.4	108.489	15.9627
CLC	Bai Huong	Camera 360	20/9/2019	S		108.527	15.9319
CLC	Bai Chong-Bai Bim	Camera 360	21/9/2019	S		108.516	15.9379
CLC	Hon La	HLN1_DR_11_G5.JPG	13/9/2019	HB		108.447	15.9667
CLC	Hon La	HLN1_DR_15_G1.JPG	13/9/2019	HB		108.451	15.9734
CLC	Bai Lang -Bai Xep	BX_DR_50_G1.JPG	22/9/2019	2LC		108.508	15.9468
CLC	Hon Mo	HM_DR_13_G1.JPG	16/9/2019	4LC		108.472	15.9312
CLC	Hon Dai	HD_O5_P3_G2.JPG	17/9/2019	1LC		108.481	15.9484
CLC	Hon Dai	HD_O5_P3_G3.JPG	17/9/2019	1LC		108.481	15.9484
CLC	Hon Mo	HM_DR_11_G5.JPG	16/9/2019	HB	9.3	108.472	15.9316
CLC	Bai Lang -Bai Xep	BX_DR_50_G4.JPG	22/9/2019	2LC		108.508	15.9468
CLC	SunGroup	SG_01_P4_G3.JPG	21/9/2019	1LC		108.523	15.9333
CLC	Hon Dai	HD_O5_G_G4.JPG	17/9/2019	1LC		108.481	15.9485
CLC	Bai Bac	BB_O22_P3_G5.JPG	15/9/2019	4LC	1.1	108.49	15.9596
CLC	Hon Dai	HD_O5_G_G5.JPG	17/9/2019	1LC		108.481	15.9485
CLC	Bai Lang -Bai Xep	BX_DR_50_G5.JPG	22/9/2019	2LC		108.508	15.9468
CLC	Bai Lang -Bai Xep	BX_DR_50_G3.JPG	22/9/2019	2LC		108.508	15.9468
CLC	Bai Lang -Bai Xep	BX_DR_50_G51.JPG	22/9/2019	2LC		108.508	15.9468
CLC	Hon La	HLN1_01_P1_G4.JPG	13/9/2019	4LC		108.448	15.9672
CLC	Bai Lang -Bai Xep	BX_O7_P2_G2.JPG	22/9/2019	2LC		108.508	15.9469
CLC	Bai Lang -Bai Xep	BX_O7_P2_G3.JPG	22/9/2019	2LC		108.508	15.9469
CLC	Bai Lang -Bai Xep	BX_O7_P3_G3.JPG	22/9/2019	2LC		108.508	15.9469
CLC	Hon Dai	HD_O9_P2_G2.JPG	17/9/2019	1LC		108.483	15.9485
CLC	Hon Dai	HD_O7_P3_G2.JPG	17/9/2019	1LC		108.482	15.9485
CLC	Hon Dai	HD_O7_P4_G2.JPG	17/9/2019	1LC		108.482	15.9485
CLC	Bai Lang -Bai Xep	BX_DR_32_G1.JPG	22/9/2019	2LC		108.508	15.9487
CLC	Bai Bac	BB_N15_DR_02.JPG	15/9/2019	3LC	0.9	108.49	15.9599
CLC	Bai Ong	Camera 360	15/9/2019	S		108.497	15.959
CLC	Hon Dai	HD_O6_P3_G1.JPG	17/9/2019	1LC		108.482	15.9486
CLC	Hon Kho	HKM_O1_3_10_G2.JPG	12/9/2019	4LC		108.422	15.9722
CLC	Hon Dai	HD_DR_34_G3.JPG	17/9/2019	4LC		108.485	15.9464
CLC	Bai Huong	Camera 360	20/9/2019	S		108.527	15.9312
CLC	Bai Chong-Bai Bim	Camera 360	21/9/2019	S		108.512	15.9418
CLC	Bai Bac	BB_O20_P3_G5.JPG	15/9/2019	3LC	2	108.49	15.96
CLC	Hon Dai	HD_O7_G_G2.JPG	17/9/2019	2LC		108.482	15.9485
CLC	Bai Bac	BB_O20_P4_G5.JPG	15/9/2019	3LC	2.4	108.49	15.96
CLC	Hon Dai	HD_O6_P3_G4.JPG	17/9/2019	1LC		108.482	15.9485
CLC	Hon Dai	HD_O6_G_G1.JPG	17/9/2019	1LC		108.482	15.9486
CLC	Bai Bac	BB_O20_G_G5.JPG	15/9/2019	3LC	2.1	108.49	15.96
CLC	Hon Dai	HD_O6_G_G4.JPG	17/9/2019	1LC		108.481	15.9486
CLC	Hon Dai	HD_DR_30_G4.JPG	17/9/2019	1LC		108.483	15.9486
CLC	Hon Dai	HD_O6_G_G2.JPG	17/9/2019	1LC		108.482	15.9486
CLC	Bai Bac	BB_O20_P1_G5.JPG	15/9/2019	3LC		108.49	15.9601
CLC	Bai Bac	BB_O20_P2_G5.JPG	15/9/2019	3LC	1.3	108.49	15.9601
CLC	Hon Dai	HD_O6_P3_G2.JPG	17/9/2019	1LC		108.482	15.9486
CLC	SunGroup	SG_01_P4_G4.JPG	21/9/2019	1LC		108.523	15.9333
CLC	Hon Dai	HD_O9_G_G3.JPG	17/9/2019	2LC		108.483	15.9486
CLC	Hon Dai	HD_DR_30_G2.JPG	17/9/2019	1LC		108.483	15.9487
CLC	Hon Dai	HD_DR_30_G3.JPG	17/9/2019	1LC		108.483	15.9487
CLC	Hon Dai	HD_DR_26_G4.JPG	17/9/2019	1LC		108.482	15.9486
CLC	Hon Dai	HD_DR_25_G3.JPG	17/9/2019	2LC		108.482	15.9486
CLC	Bai Bac	BB_18_P1_G5.JPG	15/9/2019	3LC	2.3	108.49	15.9606
CLC	Hon Dai	HD_DR_27_G4.JPG	17/9/2019	2LC		108.482	15.9487
CLC	Hon Dai	HD_DR_26_G1.JPG	17/9/2019	1LC		108.482	15.9487
CLC	Hon Dai	HD_DR_26_G3.JPG	17/9/2019	1LC		108.482	15.9487
CLC	Hon Dai	HD_DR_26_G2.JPG	17/9/2019	1LC		108.482	15.9487
CLC	Hon Dai	HD_DR_27_G2.JPG	17/9/2019	2LC		108.482	15.9488
CLC	Hon Dai	HD_DR_31_G1.JPG	17/9/2019	1LC		108.483	15.9487
CLC	Bai Chong-Bai Bim	BBi_O1_P3_G5.JPG	21/9/2019	4LC		108.515	15.9382
CLC	Hon Dai	HD_DR_60_G3.JPG	17/9/2019	4LC		108.484	15.9425
CLC	Hon Mo	Camera 360	16/9/2019	HB		108.472	15.9313
CLC	Bai Chong-Bai Bim	Camera 360	21/9/2019	S		108.512	15.9422
CLC	Hon Dai	HD_DR_31_G4.JPG	17/9/2019	1LC		108.483	15.9487
CLC	Hon Dai	HD_DR_24_G4.JPG	17/9/2019	1LC		108.481	15.9487
CLC	Hon Dai	HD_DR_21_G3.JPG	17/9/2019	1LC		108.48	15.9487
CLC	Bai Bac	BB_16_P3_G5.JPG	15/9/2019	3LC	1.2	108.49	15.9609
CLC	Bai Bac	BB_16_P1_G5.JPG	15/9/2019	3LC	2	108.49	15.9609
CLC	Bai Bac	BB_16_G_G5.JPG	15/9/2019	3LC	1.7	108.49	15.9609
CLC	Hon Dai	HD_O9_P3_G1.JPG	17/9/2019	1LC		108.483	15.9488
CLC	Hon Dai	HD_O9_P2_G1.JPG	17/9/2019	1LC		108.483	15.9488
CLC	Bai Bac	BB_16_G_G5.JPG	15/9/2019	3LC	1.7	108.49	15.961
CLC	Bai Bac	BB_16_G_G5.JPG	15/9/2019	3LC	1.7	108.49	15.961
CLC	Hon Dai	HD_O9_P2_G4.JPG	17/9/2019	1LC		108.483	15.9488
CLC	Hon Dai	HD_DR_27_G3.JPG	17/9/2019	2LC		108.482	15.9488
CLC	Hon Dai	HD_O9_P1_G4.JPG	17/9/2019	2LC		108.483	15.9488
CLC	Hon Dai	HD_O9_P4_G1.JPG	17/9/2019	2LC		108.483	15.9489
CLC	Hon Dai	HD_O9_P4_G4.JPG	17/9/2019	2LC		108.483	15.9489
CLC	Hon Dai	HD_O9_P1_G3.JPG	17/9/2019	2LC		108.483	15.9489
CLC	Hon Tai		18/9/2019	D		108.531	15.9068
CLC	Hon Dai	HD_DR_24_G3.JPG	17/9/2019	1LC		108.481	15.9487
CLC	Hon Dai	HD_DR_22_G4.JPG	17/9/2019	1LC		108.48	15.9488
CLC	Hon Tai		18/9/2019	D	16	108.533	15.909
CLC	Hon Kho	HKC_O1_1_5_G5.JPG	12/9/2019	4LC		108.418	15.9721
CLC	Hon Kho	HKM_O1_2_1_G1.JPG	12/9/2019	4LC		108.422	15.9722
CLC	Bai bac		14/9/2019	D	15.2	108.485	15.9617
CLC	Hon Mo	Camera 360	16/9/2019	HB		108.473	15.9338
CLC	Hon Mo	Camera 360	16/9/2019	HB		108.472	15.9313
CLC	Hon Mo	Camera 360	16/9/2019	S		108.472	15.9322
CLC	Hon Tai		18/9/2019	D	19	108.531	15.9095
CLC	Hon Dai	HD_DR_75_G1x.JPG	17/9/2019	4LC		108.482	15.9395
CLC	Hon Dai	HD_DR_75_G5.JPG	17/9/2019	4LC	6.7	108.482	15.9395
CLC	Hon Dai	HD_DR_60_G2.JPG	17/9/2019	4LC		108.484	15.9425
CLC	Bai Ong	Camera 360	15/9/2019	S	3.3	108.493	15.9556
CLC	Bai Bac	BB_30_P3_G5.JPG	15/9/2019	4LC		108.491	15.9594
CLC	Bai Bac	Camera 360	14/9/2019	S		108.488	15.9627
CLC	Bai Chong-Bai Bim	Camera 360	22/9/2019	S		108.511	15.9432
CLC	Hon Dai	HD_DR_22_G5.JPG	17/9/2019	1LC		108.48	15.9488
CLC	Hon Dai	HD_DR_22_G2.JPG	17/9/2019	1LC		108.48	15.9489
CLC	Hon Dai	HD_DR_22_G3.JPG	17/9/2019	1LC		108.48	15.9489
CLC	Hon Dai	HD_O9_P4_G2.JPG	17/9/2019	2LC		108.483	15.9489
CLC	Bai Lang -Bai Xep	BX_O4_P2_G3.JPG	22/9/2019	1LC		108.508	15.9494
CLC	Hon Dai	HD_O9_P4_G3.JPG	17/9/2019	2LC		108.483	15.9489
CLC	Hon Mo	Camera 360	16/9/2019	S		108.473	15.9309
CLC	Bai Lang -Bai Xep	BX_O4_G_G2.JPG	22/9/2019	1LC		108.508	15.9494
CLC	Bai Huong	Camera 360	20/9/2019	S		108.529	15.9305
CLC	Bai Chong-Bai Bim	Camera 360	21/9/2019	S		108.512	15.9417
CLC	Bai Chong-Bai Bim	Camera 360	21/9/2019	S		108.512	15.9419
CLC	Bai Lang -Bai Xep	BX_O3_P4_G2.JPG	22/9/2019	2LC		108.508	15.9515
CLC	Hon La	HLN_O5_P3_G41.JPG	13/9/2019	4LC	3.1	108.447	15.9674
CLC	Hon La	HLN_O5_P3_G42.JPG	13/9/2019	4LC		108.447	15.9674
CLC	Hon Kho	HKM_O1_2_1_G1.JPG	12/9/2019	4LC		108.422	15.9722
CLC	Bai Lang -Bai Xep	BX_O3_G_G3.JPG	22/9/2019	2LC		108.508	15.9515
CLC	Bai Lang -Bai Xep	BX_O3_G_G2.JPG	22/9/2019	2LC		108.508	15.9515
CLC	Hon Tai		18/9/2019	D		108.531	15.9097
CLC	Bai Chong-Bai Bim	BC_02_P4_G1.JPG	22/9/2019	4LC	5	108.509	15.9434
CLC	Bai Lang -Bai Xep	Camera 360	22/9/2019	S		108.508	15.9457
CLC	Bai Lang -Bai Xep	Camera 360	22/9/2019	S		108.508	15.946
CLC	Bai Lang -Bai Xep	BX_O1_P1_G3.JPG	22/9/2019	4LC		108.507	15.9533
CLC	Hon Tai		18/9/2019	D		108.532	15.9097
CLC	Bai Chong-Bai Bim	Camera 360	22/9/2019	S		108.511	15.9432
CLC	Hon Kho	HKC_O1_1_5_G5.JPG	12/9/2019	4LC		108.418	15.9721
CLC	Bai Chong-Bai Bim	Camera 360	22/9/2019	S		108.511	15.9432
CLC	Hon Tai		18/9/2019	D		108.531	15.9098
CLC	SunGroup	SG_DR_01_G3.JPG	21/9/2019	4LC		108.523	15.9334
CLC	Hon Mo		16/9/2019	D	18	108.472	15.9307
CLC	Bai Bac	BB_O10_P3_G5.JPG	15/9/2019	3LC	2.8	108.489	15.9621
CLC	Hon Mo		16/9/2019	4LC		108.474	15.931
CLC	Bai Lang -Bai Xep	BX_O1_P4_G2.JPG	22/9/2019	2LC		108.507	15.9531
CLC	Bai Huong	Camera 360	20/9/2019	S		108.529	15.9306
CLC	Bai Ong	Camera 360	15/9/2019	S		108.498	15.9595
CLC	Bai Lang -Bai Xep	BX_O1_P4_G3.JPG	22/9/2019	2LC		108.507	15.9531
CLC	Hon Tai		18/9/2019	D		108.531	15.9098
CLC	Bai Ong	BO_O3_P1_G2.JPG	15/9/2019	2LC		108.495	15.9556
CLC	Bai Ong	BO_O3_P1_G3.JPG	15/9/2019	2LC		108.495	15.9556
CLC	Bai Ong	BO_O3_P1_G5.JPG	15/9/2019	2LC		108.495	15.9557
CLC	Bai Huong	BH_DR_16_G5.JPG	20/9/2019	4LC	1.8	108.53	15.9283
CLC	Bai Bac	BB_O3_2_2_G5.JPG	14/9/2019	3LC		108.487	15.9621
CLC	Bai Ong	BO_O4_G_G2.JPG	15/9/2019	2LC		108.495	15.9558
CLC	Bai Bac	BB_O3_2_2_G2.JPG	14/9/2019	3LC		108.488	15.9621
CLC	Bai Bac	BB_O3_2_1_G51.JPG	14/9/2019	3LC	2.8	108.487	15.9622
CLC	Bai Bac	BB_O3_2_1_G5.JPG	14/9/2019	3LC		108.487	15.9622
CLC	Bai Ong	BO_O4_P4_G5.JPG	15/9/2019	2LC		108.495	15.9558
CLC	Bai Ong	BO_O4_P4_G4.JPG	15/9/2019	2LC		108.495	15.9558
CLC	Bai Bac	BB_O3_2_1_G5.JPG	14/9/2019	3LC	2.8	108.487	15.9622
CLC	Bai Ong	BO_O6_P3_G1.JPG	15/9/2019	2LC		108.496	15.9559
CLC	Bai Ong	BO_O6_P3_G51.JPG	15/9/2019	2LC		108.496	15.9559
CLC	Bai Lang -Bai Xep	BX_DR_15_G3.JPG	22/9/2019	1LC		108.508	15.9521
CLC	Bai Ong	BO_O6_P3_G2.JPG	15/9/2019	2LC		108.496	15.9559
CLC	Bai Bac	BB_O3_2_1_G5.JPG	14/9/2019	3LC	2.8	108.487	15.9622
CLC	Bai Ong	BO_O6_P3_G3.JPG	15/9/2019	2LC		108.496	15.9559
CLC	Bai Ong	BO_O9_P2_G4.JPG	15/9/2019	2LC		108.496	15.9562
CLC	Bai Bac	BB_O3_1_10_G5.JPG	14/9/2019	3LC		108.487	15.9622
CLC	SunGroup	SG_01_P5_G2.JPG	21/9/2019	1LC		108.523	15.9333
CLC	Bai Ong	BO_O9_P2_G1.JPG	15/9/2019	2LC		108.496	15.9562
CLC	Hon Tai		18/9/2019	D		108.531	15.9099
CLC	Bai Bac	BB_O3_1_9_G5.JPG	14/9/2019	3LC		108.487	15.9622
CLC	Bai Bac	BB_N19_DR_129_G52.JPG	15/9/2019	1LC		108.492	15.9573
CLC	Bai Bac	BB_N19_DR_129_G4.JPG	15/9/2019	1LC		108.492	15.9573
CLC	Bai Ong	BO_O9_P2_G2.JPG	15/9/2019	2LC		108.496	15.9562
CLC	Bai Chong-Bai Bim	BBi_DR_10_G5.JPG	21/9/2019	4LC		108.515	15.9382
CLC	Bai Bac	BB_N19_DR_129_G53.JPG	15/9/2019	1LC		108.492	15.9573
CLC	Bai Bac	BB_O3_3_2_G3.JPG	14/9/2019	3LC	3	108.488	15.9622
CLC	Bai Bac	BB_N19_DR_129_G5.JPG	15/9/2019	1LC		108.492	15.9573
CLC	Bai Ong	BO_O9_P2_G3.JPG	15/9/2019	2LC		108.496	15.9562
CLC	Hon Tai		18/9/2019	D		108.532	15.91
CLC	Bai Ong	BO_DR_72_G5.JPG	15/9/2019	1LC		108.497	15.9578
CLC	Bai Bac	BB_26_G_G2.JPG	15/9/2019	1LC		108.491	15.9581
CLC	Bai Bac	Camera 360	15/9/2019	S		108.49	15.96
CLC	Hon Tai		18/9/2019	D		108.531	15.91
CLC	Bai Bac	BB_26_G_G5.JPG	15/9/2019	1LC		108.491	15.9581
CLC	Hon Mo	HM_DR_12_G1.JPG	16/9/2019	1LC		108.472	15.9314
CLC	Hon La	HLN_O5_P3_G4.JPG	13/9/2019	4LC		108.447	15.9674
CLC	Hon Mo	HM_DR_11_G3.JPG	16/9/2019	1LC		108.472	15.9316
CLC	Bai Bac	BB_21_P2_G3.JPG	15/9/2019	1LC		108.49	15.9596
CLC	Bai Bac	BB_N15_DR_01.JPG	15/9/2019	1LC		108.49	15.9598
CLC	Hon Tai		18/9/2019	D	20	108.534	15.9101
CLC	SunGroup	SG_DR_01_G4.JPG	21/9/2019	4LC		108.523	15.9334
CLC	Hon Tai		18/9/2019	D		108.531	15.9101
CLC	Bai Huong	BH_DR_4_G21.JPG	20/9/2019	4LC		108.53	15.9268
CLC	Bai Huong	BH_DR_4_G2.JPG	20/9/2019	4LC		108.53	15.9268
CLC	SunGroup	SG_DR_01_G5.JPG	21/9/2019	4LC	3.8	108.523	15.9334
CLC	Bai Ong	Camera 360	15/9/2019	S		108.497	15.9593
CLC	Bai Ong	Camera 360	15/9/2019	S		108.498	15.9596
CLC	Hon Tai		18/9/2019	D		108.532	15.9103
CLC	Bai Ong	BO_11_P2_G5.JPG	15/9/2019	2LC		108.496	15.9565
CLC	Bai Huong	Camera 360	20/9/2019	S		108.529	15.9302
CLC	Bai Ong	BO_11_G_G1.JPG	15/9/2019	2LC		108.496	15.9566
CLC	Bai Bac	BB_O6_2_3_G5.JPG	14/9/2019	3LC		108.486	15.9625
CLC	Bai Bac	BB_19_P2_G2.JPG	15/9/2019	1LC		108.49	15.96
CLC	Bai Ong	Camera 360	15/9/2019	S		108.494	15.9555
CLC	Bai Bac	BB_19_P1_G1.JPG	15/9/2019	1LC		108.49	15.9601
CLC	Bai Bac	BB_19_P1_G4.JPG	15/9/2019	1LC		108.49	15.9601
CLC	SunGroup	SG_DR_03_G4.JPG	21/9/2019	HB		108.523	15.9332
CLC	Bai Bac	BB_19_P1_G3.JPG	15/9/2019	1LC		108.49	15.9601
CLC	Bai Bac	BB_18_P3_G1.JPG	15/9/2019	1LC		108.49	15.9603
CLC	Bai Ong	Camera 360	15/9/2019	S		108.497	15.9595
CLC	Bai Ong	BO_12_P4_G2.JPG	15/9/2019	2LC		108.497	15.9567
CLC	Hon Tai		18/9/2019	D		108.531	15.9103
CLC	Bai Bac	BB_18_P3_G3.JPG	15/9/2019	1LC		108.49	15.9603
CLC	Hon Tai		18/9/2019	D		108.531	15.9104
CLC	Bai Bac	BB_18_P3_G4.JPG	15/9/2019	1LC		108.49	15.9603
CLC	Hon Tai		18/9/2019	D		108.531	15.9105
CLC	Bai Bac	BB_15_G_G1.JPG	15/9/2019	1LC		108.489	15.9607
CLC	Bai Bac	BB_15_P1_G2.JPG	15/9/2019	1LC		108.489	15.9607
CLC	Hon Kho	HKC_O2_1_9_G5.JPG	12/9/2019	4LC	4.2	108.418	15.973
CLC	Bai Bac	BB_17_P1_G5.JPG	15/9/2019	1LC		108.49	15.9609
CLC	Bai Bac	BB_14_G_G21.JPG	15/9/2019	1LC		108.49	15.9615
[truncated: 707 more rows]
