# Supplementary material for: Characterizing the spatial distribution of coral reefs in the South-Central Coast region of Viet Nam using Planetscope imagery
Source: PeerJ. 2021 Nov 2;9:e12413. doi: 10.7717/peerj.12413 (PMC8570177; doi:10.7717/peerj.12413)
Supplement: Supplemental Information 4 [file peerj-09-12413-s004.xls]

## Sheet: SonTra field data
Area	Site	Image	Date	Bottom	Depth_insi	X	Y
Son Tra			14/8/2019	D	14	108.296	16.0987
Son Tra			17/8/2019	D	14	108.261	16.0874
Son Tra			13/8/2019	D	14	108.312	16.1052
Son Tra	Bai But	BBU_DR_02_G5.JPG	15/8/2019	2LC		108.278	16.0975
Son Tra	Bai But	BBU_DR_02_G51.JPG	15/8/2019	2LC		108.278	16.0975
Son Tra	Bai But	BBU_DR_02_G52JPG	15/8/2019	2LC	2	108.278	16.0974
Son Tra	Bai But	BBU_DR_02_G53.JPG	15/8/2019	2LC		108.278	16.0974
Son Tra	Bai But	BBU_DR_02_G54.JPG	15/8/2019	2LC		108.278	16.0974
Son Tra	Bai But	BBU_DR_02_G55JPG	15/8/2019	2LC		108.278	16.0974
Son Tra	Bai But	BBU_DR_17_G5.JPG	15/8/2019	2LC		108.279	16.0972
Son Tra	Hon Sup	DHS_02_P4_G51.JPG	17/8/2019	3LC		108.263	16.0887
Son Tra	Hon Sup	DHS_02_P4_G5.JPG	17/8/2019	3LC	4	108.263	16.0887
Son Tra	Hon Sup	DHS_02_P5	17/8/2019	3LC	4.8	108.263	16.0887
Son Tra	Bai But	BBU_DR_18_G5.JPG	15/8/2019	2LC		108.279	16.0973
Son Tra	Vung Da	BBU_O2_P1_G51.JPG	12/8/2019	2LC		108.323	16.116
Son Tra	Vung Da	BBU_O2_P1_G52.JPG	12/8/2019	2LC		108.323	16.116
Son Tra	Hon Sup	DHS_DR_04_G2.JPG	17/8/2019	3LC		108.263	16.0882
Son Tra	Hon Sup	DHS_DR_04_G21.JPG	17/8/2019	3LC		108.263	16.0882
Son Tra	Hon Sup	DHS_DR_04_G5.JPG	17/8/2019	3LC	7	108.263	16.0881
Son Tra	Hon Sup	DHS_DR_04_G6.JPG	17/8/2019	3LC		108.263	16.0882
Son Tra	Hon Sup	DHS_DR_05_G5.JPG	17/8/2019	3LC	3.5	108.263	16.0888
Son Tra	Hon Sup	DHS_DR_06	17/8/2019	3LC	3.7	108.263	16.0887
Son Tra	Hon Sup	DHS_DR_07_G5.JPG	17/8/2019	3LC	4.3	108.263	16.089
Son Tra	Bai But	BBU1_01_P1_G5.JPG	15/8/2019	2LC		108.276	16.0973
Son Tra	Hon Sup	DHS_DR_08_G2.JPG	17/8/2019	3LC	5	108.263	16.0882
Son Tra	Bai But	BBU1_03_P1_G2.JPG	15/8/2019	2LC		108.275	16.0974
Son Tra	Bai But	BBU1_03_P3_G31JPG	15/8/2019	2LC		108.275	16.0974
Son Tra	Hon Sup	THS_01_P2_G5.JPG	17/8/2019	3LC	3.5	108.262	16.0898
Son Tra	Hon Sup	THS_01_P3_G5.JPG	17/8/2019	3LC	4	108.262	16.0898
Son Tra	Bai But	BBU1_03_P3_G35.JPG	15/8/2019	2LC		108.275	16.0974
Son Tra	Bai Nom	BN_DR_81_G5.JPG	14/8/2019	1LC	0.8	108.3	16.1009
Son Tra	Hon Sup	THS_02_P2_G5.JPG	17/8/2019	3LC	2.8	108.262	16.0895
Son Tra	Hon Sup	THS_02_P3_G5.JPG	17/8/2019	3LC	2.8	108.262	16.0895
Son Tra	Hon Sup	THS_02_P5_G5.JPG	17/8/2019	3LC	2.6	108.262	16.0895
Son Tra	Bai Nom	BN_DR_48_G5.JPG	14/8/2019	1LC	0.9	108.3	16.1019
Son Tra	Bai Nom	BN_DR_50_G5.JPG	14/8/2019	1LC	0.9	108.3	16.1018
Son Tra	Bai But	BBU1_DR_22_G5.JPG	15/8/2019	1LC	1	108.275	16.0979
Son Tra	Bai Nom	BN_DR_93_G5.JPG	14/8/2019	1LC	1.2	108.3	16.0998
Son Tra	Huc Lo	HL_DR_13_G5.JPG	13/8/2019	1LC	1.2	108.313	16.1125
Son Tra	Hon Sup	THS_04_P1_G51.JPG	17/8/2019	3LC		108.262	16.0893
Son Tra	Hon Sup	THS_04_P1_G5.JPG	17/8/2019	3LC	1.5	108.262	16.0893
Son Tra	Hon Sup	THS_04_P2_G5.JPG	17/8/2019	3LC	1.6	108.262	16.0894
Son Tra	Hon Sup	THS_04_P3_G5.JPG	17/8/2019	3LC	1.4	108.262	16.0893
Son Tra	Hon Sup	THS_04_P4_G5.JPG	17/8/2019	3LC		108.262	16.0892
Son Tra	Huc Lo	HL_O3_P2_G5.JPG	13/8/2019	1LC	1.2	108.313	16.1125
Son Tra	Hon Sup	THS_04_P5_G51.JPG	17/8/2019	3LC		108.262	16.0893
Son Tra	Hon Sup	THS_05_P1_G5.JPG	17/8/2019	3LC	2.3	108.262	16.0895
Son Tra	Hon Sup	THS_05_P2_G5.JPG	17/8/2019	3LC	2	108.262	16.0894
Son Tra	Bai But	BBU1_03_P3_G5.JPG	15/8/2019	2LC		108.275	16.0973
Son Tra	Bai Nom	BN_DR_91_G5.JPG	14/8/2019	1LC	1.3	108.3	16.1
Son Tra	Hon Sup	THS_06_P1_G2.JPG	17/8/2019	3LC		108.262	16.0898
Son Tra	Hon Sup	THS_06_P1_G5.JPG	17/8/2019	3LC		108.262	16.0898
Son Tra	Hon Sup	THS_06_P2_G5.JPG	17/8/2019	3LC	3.4	108.262	16.0898
Son Tra	Hon Sup	THS_06_P3_G5.JPG	17/8/2019	3LC	4	108.262	16.0899
Son Tra	Hon Sup	THS_06_P4_G5.JPG	17/8/2019	3LC	4.5	108.262	16.0898
Son Tra	Hon Sup	THS_06_P5_G5.JPG	17/8/2019	3LC	3.7	108.262	16.0898
Son Tra	Bai Nom	BN_DR_94_G5.JPG	14/8/2019	1LC	1.3	108.3	16.0998
Son Tra	Bai But	BBU1_14_P1	15/8/2019	1LC	1.4	108.273	16.0979
Son Tra	Bai But	BBU1_14_P4	15/8/2019	1LC	1.4	108.273	16.0979
Son Tra	Bai Nom	BN_O2_P4_G5.JPG	14/8/2019	1LC	1.4	108.301	16.0987
Son Tra	Hon Sup	THS_07_P5_G51.JPG	17/8/2019	3LC		108.261	16.0899
Son Tra	Hon Sup	THS_07_P5_G52.JPG	17/8/2019	3LC		108.261	16.0899
Son Tra	Bai But	BBU_DR_06_G5.JPG	15/8/2019	1LC	1.6	108.278	16.0974
Son Tra			16/8/2019	D	14	108.267	16.0887
Son Tra	Bai But	BBU1_DR_52	15/8/2019	1LC	1.6	108.273	16.0978
Son Tra	Bai Nom	BN_DR_39_G5.JPG	14/8/2019	1LC	1.6	108.3	16.102
Son Tra			14/8/2019	D	14	108.296	16.1023
Son Tra			9/8/2019	D	14	108.304	16.1265
Son Tra	Dong Bai Bac	DBB_07_P1_G5.JPG	10/8/2019	1LC	1.6	108.312	16.1377
Son Tra	Hon Sup	THS_08_P3_G5.JPG	17/8/2019	3LC	3.2	108.261	16.0899
Son Tra	Hon Sup	THS_08_P4_G5.JPG	17/8/2019	3LC	3	108.261	16.0899
Son Tra	Dong Bai Bac	DBB_DR_34_G5.JPG	10/8/2019	1LC	1.6	108.312	16.138
Son Tra			14/8/2019	D	14	108.297	16.0973
Son Tra	Hon Sup	THS_09_P1_G4.JPG	17/8/2019	3LC		108.261	16.0896
Son Tra	Hon Sup	THS_09_P1_G5.JPG	17/8/2019	3LC	2.7	108.261	16.0896
Son Tra	Bai But	BBU1_03_P3_G52JPG	15/8/2019	2LC	2.5	108.275	16.0974
Son Tra	Bai But	BBU1_04_P1_G3.JPG	15/8/2019	2LC		108.275	16.0971
Son Tra	Bai But	BBU1_04_P1_G5.JPG	15/8/2019	2LC	2.5	108.275	16.0971
Son Tra			15/8/2019	D	14	108.275	16.0934
Son Tra	Bai But	BBU1_04_P4_G5.JPG	15/8/2019	2LC	2.9	108.275	16.0971
Son Tra	Hon Sup	THS_09_P4_G5.JPG	17/8/2019	3LC		108.261	16.0896
Son Tra	Hon Sup	THS_09_P5_G2.JPG	17/8/2019	3LC		108.261	16.0896
Son Tra	Hon Sup	THS_09_P5_G5.JPG	17/8/2019	3LC	3	108.261	16.0896
Son Tra	Vung Da		12/8/2019	D	14	108.325	16.1151
Son Tra	Hon Sup	THS_10_P1_G5.JPG	17/8/2019	3LC	2.3	108.261	16.0893
Son Tra	Mui Sung	MS_O2_P1_G5.JPG	14/8/2019	1LC	1.6	108.308	16.0965
Son Tra	Hon Sup	THS_10_P3_G5.JPG	17/8/2019	3LC	3.1	108.261	16.0892
Son Tra	Bai But	BBU_DR_01_G5.JPG	15/8/2019	1LC	1.7	108.278	16.0974
Son Tra	Bai But	BBU1_DR_09_G5.JPG	15/8/2019	1LC	1.7	108.275	16.0975
Son Tra	Bai But	BBU1_04_P5_G2.JPG	15/8/2019	2LC		108.275	16.0971
Son Tra	Bai But	BBU1_04_P5_G5.JPG	15/8/2019	2LC	2.8	108.275	16.0971
Son Tra	Bai But	BBU1_05_P1_G5.JPG	15/8/2019	2LC	1.5	108.275	16.0977
Son Tra	Bai But	BBU1_DR_51	15/8/2019	1LC	1.7	108.273	16.0978
Son Tra	Bai But	BBU1_05_P2_G5.JPG	15/8/2019	2LC		108.275	16.0976
Son Tra	Hon Sup	THS_12_P1_G3.JPG	17/8/2019	3LC		108.262	16.0888
Son Tra	Hon Sup	THS_12_P1_G5.JPG	17/8/2019	3LC		108.261	16.0888
Son Tra	Bai But	BBU1_05_P3_G5.JPG	15/8/2019	2LC	1.8	108.275	16.0977
Son Tra	Hon Sup	THS_12_P3_G5.JPG	17/8/2019	3LC	2.3	108.262	16.0888
Son Tra	Hon Sup	THS_12_P4_G5.JPG	17/8/2019	3LC	2.3	108.261	16.0889
Son Tra	Hon Sup	THS_12_P5_G5.JPG	17/8/2019	3LC	2	108.261	16.0888
Son Tra	Bai But	BBU1_05_P4_G5.JPG	15/8/2019	2LC	1.3	108.275	16.0977
Son Tra	Bai But	BBU1_05_P5_G5.JPG	15/8/2019	2LC		108.275	16.0977
Son Tra	Bai But	BBU1_07_P1_G5.JPG	15/8/2019	2LC	2	108.274	16.0974
Son Tra	Bai But	BBU1_07_P2_G5.JPG	15/8/2019	2LC	1.9	108.274	16.0975
Son Tra	Bai But		16/8/2019	D	14	108.272	16.0968
Son Tra	Bai But	BBU1_DR_02_G5.JPG	15/8/2019	2LC		108.275	16.0974
Son Tra	Hon Sup	THS_14_P1_G5.JPG	17/8/2019	3LC	2.3	108.262	16.0886
Son Tra	Hon Sup	THS_14_P3_G5.JPG	17/8/2019	3LC	1.9	108.262	16.0887
Son Tra	Hon Sup	THS_14_P5_G5.JPG	17/8/2019	3LC	2	108.262	16.0886
Son Tra	Hon Sup	THS_15_P1_G1.JPG	17/8/2019	3LC		108.261	16.0893
Son Tra	Hon Sup	THS_15_P1_G3.JPG	17/8/2019	3LC		108.261	16.0893
Son Tra	Hon Sup	THS_15_P1_G5.JPG	17/8/2019	3LC	3.4	108.261	16.0893
Son Tra	Hon Sup	THS_15_P2_G1.JPG	17/8/2019	3LC		108.261	16.0894
Son Tra	Hon Sup	THS_15_P2_G4.JPG	17/8/2019	3LC		108.261	16.0894
Son Tra	Hon Sup		17/8/2019	D	14.1	108.26	16.0886
Son Tra	Bai But	BBU1_DR_08_G5.JPG	15/8/2019	2LC	2.2	108.276	16.0971
Son Tra	Hon Sup	THS_15_P3_G2.JPG	17/8/2019	3LC		108.261	16.0893
Son Tra	Hon Sup	THS_15_P3_G3.JPG	17/8/2019	3LC		108.261	16.0894
Son Tra	Hon Sup	THS_15_P3_G5.JPG	17/8/2019	3LC	3.2	108.261	16.0894
Son Tra	Hon Sup	THS_15_P4_G4.JPG	17/8/2019	3LC		108.261	16.0893
Son Tra	Hon Sup	THS_15_P4_G5.JPG	17/8/2019	3LC	3.3	108.261	16.0893
Son Tra	Hon Sup	THS_15_P5_G3.JPG	17/8/2019	3LC		108.261	16.0894
Son Tra	Hon Sup	THS_15_P5_G5.JPG	17/8/2019	3LC		108.261	16.0893
Son Tra	Bai But	BBU1_DR_11_G3.JPG	15/8/2019	2LC		108.275	16.0975
Son Tra	Hon Sup	THS_16_P1_G5.JPG	17/8/2019	3LC	3.2	108.261	16.0899
Son Tra	Bai But	BBU1_DR_16_G51.JPG	15/8/2019	2LC	2.4	108.275	16.0974
Son Tra	Bai But	BBU1_DR_19_G4.JPG	15/8/2019	2LC		108.275	16.0976
Son Tra	Bai But	BBU1_DR_21_G5.JPG	15/8/2019	2LC	1.2	108.275	16.0978
Son Tra	Bai But	BBU1_DR_20_G5.JPG	15/8/2019	1LC	1.8	108.275	16.0978
Son Tra	Bai Nom	BN_O3_P3_G5.JPG	14/8/2019	1LC	1.8	108.302	16.0973
Son Tra	Huc Lo	HL7_04_P4_G5.JPG	13/8/2019	1LC	1.8	108.309	16.1064
Son Tra	Hon Sup	THS_16_P4_G1.JPG	17/8/2019	3LC		108.261	16.0896
Son Tra	Hon Sup	THS_16_P4_G4.JPG	17/8/2019	3LC		108.261	16.0896
Son Tra	Hon Sup	THS_16_P4_G5.JPG	17/8/2019	3LC	3.1	108.261	16.0897
Son Tra	Hon Sup	THS_19_P1	17/8/2019	1LC	1.8	108.262	16.0887
Son Tra	Bai But	BBU1_18_P1_G5.JPG	15/8/2019	1LC	1.9	108.273	16.0973
Son Tra	Bai But	BBU1_DR_23_G3.JPG	15/8/2019	2LC		108.274	16.0975
Son Tra	Bai But	BBU1_DR_44_G5.JPG	16/8/2019	2LC	3.5	108.272	16.0973
Son Tra	Bai But	BBU1_DR_38_G5.JPG	16/8/2019	1LC	1.9	108.272	16.0977
Son Tra	Hon Sup	THS_17_P1_G5.JPG	17/8/2019	3LC	3.3	108.26	16.0898
Son Tra	Dong Bai Bac	DBB_05_P1_G5.JPG	10/8/2019	1LC	1.9	108.312	16.1371
Son Tra	Hon Sup	THS_17_P2_G5.JPG	17/8/2019	3LC	3.4	108.26	16.0895
Son Tra	Bai But	BBU_DR_03_G5.JPG	15/8/2019	1LC	2	108.278	16.0975
Son Tra	Bai But	BBU1_DR_53	15/8/2019	2LC	1.9	108.273	16.0977
Son Tra	Bai But	BBU_DR_11_G5.JPG	15/8/2019	1LC	2	108.279	16.0973
Son Tra	Bai But	BBU1_DR_61_G5.JPG	15/8/2019	2LC	5.3	108.274	16.0965
Son Tra	Bai Nom	BN_10_P1_G5.JPG	14/8/2019	2LC		108.3	16.0997
Son Tra	Bai Nom	BN_10_P2_G6.JPG	14/8/2019	2LC		108.3	16.0997
Son Tra	Bai Nom	BN_10_P2_G7.JPG	14/8/2019	2LC		108.3	16.0997
Son Tra	Hon Sup	THS_17_P4_G3.JPG	17/8/2019	3LC		108.26	16.0898
Son Tra	Hon Sup	THS_17_P4_G5.JPG	17/8/2019	3LC	3.3	108.26	16.0897
Son Tra	Hon Sup	THS_17_P5_G11.JPG	17/8/2019	3LC		108.26	16.0894
Son Tra	Hon Sup	THS_17_P5_G1.JPG	17/8/2019	3LC		108.26	16.0895
Son Tra	Hon Sup	THS_17_P5_G5.JPG	17/8/2019	3LC	3.2	108.26	16.0895
Son Tra	Hon Sup	THS_18_P1_G4.JPG	17/8/2019	3LC		108.261	16.0889
Son Tra	Hon Sup	THS_18_P1_G5.JPG	17/8/2019	3LC	3.5	108.261	16.089
Son Tra	Hon Sup	THS_18_P2_G5.JPG	17/8/2019	3LC	5	108.261	16.0889
Son Tra	Hon Sup	THS_18_P3	17/8/2019	3LC	7	108.261	16.0889
Son Tra	Bai Nom	BN_10_P3_G1.JPG	14/8/2019	2LC		108.3	16.0997
Son Tra	Bai Nom	BN_10_P5_G1.JPG	14/8/2019	2LC		108.3	16.0997
Son Tra	Bai Nom	BN_10_P5_G5.JPG	14/8/2019	2LC	2.5	108.3	16.0997
Son Tra	Hon Sup	THS_18_P5_G4.JPG	17/8/2019	3LC	4.2	108.261	16.0889
Son Tra	Bai But	BBU1_DR_10_G5.JPG	15/8/2019	1LC	2	108.275	16.0976
Son Tra	Bai Nom	BN_DR_07_G5.JPG	14/8/2019	1LC	2	108.301	16.0987
Son Tra	Bai Nom	BN_DR_29_G5.JPG	14/8/2019	1LC	2	108.3	16.1022
Son Tra	Bai Nom	BN_DR_66_G5.JPG	14/8/2019	1LC	2	108.3	16.1011
Son Tra	Huc Lo	HL_DR_12_G5.JPG	13/8/2019	1LC	2	108.313	16.1125
Son Tra	Bai Nom	BN_11_P1_G5.JPG	14/8/2019	2LC	1.6	108.3	16.0994
Son Tra	Hon Sup	THS_05_P5_G5.JPG	17/8/2019	1LC	2	108.262	16.0893
Son Tra	Bai Nom	BN_11_P2_G5.JPG	14/8/2019	2LC		108.3	16.0993
Son Tra	Bai Nom	BN_11_P3_G4.JPG	14/8/2019	2LC		108.3	16.0993
Son Tra	Bai Nom	BN_11_P3_G5.JPG	14/8/2019	2LC	1.8	108.3	16.0993
Son Tra	Bai Nom	BN_11_P4_G5.JPG	14/8/2019	2LC		108.3	16.0994
Son Tra	Bai Nom	BN_11_P5_G5.JPG	14/8/2019	2LC	2.2	108.3	16.0994
Son Tra	Bai Nom	BN_DR_07_G2.JPG	14/8/2019	2LC		108.301	16.0986
Son Tra	Bai Nom	BN_DR_08_G3.JPG	14/8/2019	2LC		108.301	16.0987
Son Tra	Bai Nom	BN_DR_27_G5.JPG	14/8/2019	2LC	1.6	108.3	16.1023
Son Tra	Bai Nom	BN_DR_37_G5.JPG	14/8/2019	2LC	1.6	108.3	16.1018
Son Tra	Bai Nom	BN_DR_38_G5.JPG	14/8/2019	2LC	1.9	108.299	16.1019
Son Tra	Bai Nom	BN_DR_40_G5.JPG	14/8/2019	2LC	1.2	108.3	16.102
Son Tra	Bai Nom	BN_DR_41_G5.JPG	14/8/2019	2LC	1.1	108.3	16.102
Son Tra	Bai Nom	BN_DR_42_G5.JPG	14/8/2019	2LC	1	108.3	16.1022
Son Tra	Bai Nom	BN_DR_43_G5.JPG	14/8/2019	2LC	1.1	108.3	16.1021
Son Tra	Bai Nom	BN_DR_47_G5.JPG	14/8/2019	2LC	0.5	108.3	16.102
Son Tra	Bai Nom	BN_DR_49_G5.JPG	14/8/2019	2LC	1	108.3	16.1019
Son Tra	Bai Nom	BN_DR_51_G5.JPG	14/8/2019	2LC	0.7	108.3	16.1018
Son Tra	Bai Nom	BN_DR_52_G5.JPG	14/8/2019	2LC	1.3	108.3	16.1017
Son Tra	Bai Nom	BN_DR_57_G5.JPG	14/8/2019	2LC	2.3	108.3	16.1014
Son Tra	Bai Nom	BN_DR_59_G5.JPG	14/8/2019	2LC	1.3	108.3	16.1017
Son Tra	Bai Nom	BN_DR_60_G5.JPG	14/8/2019	2LC	1.1	108.3	16.1015
Son Tra	Bai Nom	BN_DR_64_G3.JPG	14/8/2019	2LC		108.299	16.1013
Son Tra	Bai Nom	BN_DR_68_G5.JPG	14/8/2019	2LC	0.9	108.3	16.1012
Son Tra	Bai Nom	BN_DR_69_G5.JPG	14/8/2019	2LC	0.8	108.3	16.1012
Son Tra	Bai Nom	BN_DR_70_G5.JPG	14/8/2019	2LC	0.9	108.3	16.1012
Son Tra	Bai Nom	BN_DR_72_G5.JPG	14/8/2019	2LC	1.4	108.3	16.101
Son Tra	Bai Nom	BN_DR_73_G5.JPG	14/8/2019	2LC	1.3	108.3	16.101
Son Tra	Bai Nom	BN_DR_74_G2.JPG	14/8/2019	2LC		108.3	16.1008
Son Tra	Bai Nom	BN_DR_74_G21.JPG	14/8/2019	2LC		108.3	16.1008
Son Tra	Bai Nom	BN_DR_74_G5.JPG	14/8/2019	2LC	2.2	108.3	16.1009
Son Tra	Hon Sup	THS_DR_04_G4.JPG	17/8/2019	3LC		108.262	16.0897
Son Tra	Hon Sup	THS_DR_04_G5.JPG	17/8/2019	3LC	3.1	108.262	16.0897
Son Tra	Hon Sup	THS_DR_04_G51.JPG	17/8/2019	3LC		108.262	16.0897
Son Tra	Bai But	BBU1_13_P5	15/8/2019	1LC	2.1	108.273	16.0975
Son Tra	Bai But	BBU1_DR_34_G5.JPG	16/8/2019	1LC	2.1	108.273	16.0977
Son Tra	Hon Sup	THS_DR_06_G5.JPG	17/8/2019	3LC	2.7	108.262	16.0895
Son Tra	Hon Sup	THS_DR_07_G5.JPG	17/8/2019	3LC	2.8	108.262	16.0896
Son Tra	Huc Lo	HL_DR_05_G5.JPG	13/8/2019	1LC	2.1	108.314	16.1123
Son Tra	Bai But	BBU1_13_P1	15/8/2019	1LC	2.2	108.273	16.0975
Son Tra	Hon Sup	THS_DR_10_G50.JPG	17/8/2019	3LC	2.7	108.262	16.0896
Son Tra	Hon Sup	THS_DR_10_G5.JPG	17/8/2019	3LC		108.262	16.0896
Son Tra	Hon Sup	THS_DR_10_G51.JPG	17/8/2019	3LC		108.262	16.0896
Son Tra	Hon Sup	THS_DR_10_G51.JPG	17/8/2019	3LC		108.262	16.0896
Son Tra	Hon Sup	THS_DR_10_G55.JPG	17/8/2019	3LC		108.262	16.0896
Son Tra	Bai Nom	BN_DR_75_G5.JPG	14/8/2019	2LC		108.3	16.1011
Son Tra	Bai But	BBU1_18_P5_G5.JPG	15/8/2019	1LC	2.2	108.273	16.0973
Son Tra	Hon Sup	THS_DR_14_G5.JPG	17/8/2019	3LC	3.2	108.261	16.0899
Son Tra	Hon Sup	THS_DR_15_G21.JPG	17/8/2019	3LC		108.261	16.0898
Son Tra	Hon Sup	THS_DR_15_G2.JPG	17/8/2019	3LC		108.261	16.0898
Son Tra	Hon Sup	THS_DR_15_G5.JPG	17/8/2019	3LC	3.1	108.261	16.0899
Son Tra	Hon Sup	THS_DR_16_G5.JPG	17/8/2019	3LC	2.7	108.261	16.0895
Son Tra	Hon Sup	THS_DR_18_G5.JPG	17/8/2019	3LC	2.1	108.261	16.0892
Son Tra	Bai Nom	BN_DR_77_G5.JPG	14/8/2019	2LC	1.8	108.3	16.1008
Son Tra	Bai But	BBU1_DR_18_G5.JPG	15/8/2019	1LC	2.2	108.275	16.0974
Son Tra	Bai But	BBU1_DR_33_G5.JPG	16/8/2019	1LC	2.2	108.272	16.0975
Son Tra	Bai Nom	BN_DR_79_G5.JPG	14/8/2019	2LC	1.2	108.3	16.1007
Son Tra	Bai But	BBU1_DR_55_G5.JPG	15/8/2019	1LC	2.2	108.273	16.0976
Son Tra	Bai Nom	BN_DR_62_G5.JPG	14/8/2019	1LC	2.2	108.299	16.1014
Son Tra	Bai Nom	BN_O5_P1_G5.JPG	14/8/2019	1LC	2.2	108.3	16.1021
Son Tra	Dong Bai Bac	DBB_DR_48_G5.JPG	10/8/2019	1LC	2.2	108.312	16.1401
Son Tra	Bai Nom	BN_DR_80_G5.JPG	14/8/2019	2LC	1.1	108.3	16.1005
Son Tra	Bai Nom	BN_DR_82_G5.JPG	14/8/2019	2LC	1.9	108.3	16.1004
Son Tra	Bai Nom	BN_DR_82_G6.JPG	14/8/2019	2LC		108.3	16.1009
Son Tra	Bai Nom	BN_DR_88_G5.JPG	14/8/2019	2LC	1.9	108.3	16.1
Son Tra	Bai Nom	BN_DR_89_G5.JPG	14/8/2019	2LC	1.4	108.3	16.1001
Son Tra	Bai Nom	BN_DR_98_G5.JPG	14/8/2019	2LC	2.2	108.3	16.0993
Son Tra	Hon Sup	THS_DR_26_G4.JPG	17/8/2019	3LC		108.261	16.0889
Son Tra	Hon Sup	THS_DR_26_G4.JPG	17/8/2019	3LC		108.261	16.089
Son Tra	Hon Sup	THS_DR_26_G4.JPG	17/8/2019	3LC		108.261	16.089
Son Tra	Hon Sup	THS_DR_26_G41.JPG	17/8/2019	3LC		108.261	16.0889
Son Tra	Bai Nom	BN_O1_P2_G3.JPG	14/8/2019	2LC		108.301	16.0988
Son Tra	Huc Lo	HL_O2_P4_G5.JPG	13/8/2019	1LC	2.2	108.314	16.1122
Son Tra	Hon Sup	THS_DR_27_G5.JPG	17/8/2019	3LC	3.4	108.261	16.089
Son Tra	Bai Nom	BN_O1_P2_G5.JPG	14/8/2019	2LC		108.301	16.0988
Son Tra	Hon Sup	THS_DR_28_G41.JPG	17/8/2019	3LC		108.261	16.0894
Son Tra	Hon Sup	THS_DR_28_G4.JPG	17/8/2019	3LC		108.261	16.0895
Son Tra	Hon Sup	THS_DR_28_G42.JPG	17/8/2019	3LC		108.261	16.0895
Son Tra	Hon Sup	THS_04_P5_G5.JPG	17/8/2019	1LC	2.2	108.262	16.0893
Son Tra	Hon Sup	THS_DR_29_G5.JPG	17/8/2019	3LC	3.3	108.261	16.0896
Son Tra	Hon Sup	THS_DR_30_G21.JPG	17/8/2019	3LC		108.261	16.0899
Son Tra	Hon Sup	THS_DR_30_G2.JPG	17/8/2019	3LC		108.261	16.0899
Son Tra	Hon Sup	THS_DR_30_G22.JPG	17/8/2019	3LC		108.261	16.0899
Son Tra	Hon Sup	THS_DR_30_G3.JPG	17/8/2019	3LC		108.26	16.0902
Son Tra	Hon Sup	THS_DR_30_G31.JPG	17/8/2019	3LC		108.26	16.0901
Son Tra	Hon Sup	THS_DR_30_G32.JPG	17/8/2019	3LC		108.26	16.0901
Son Tra	Hon Sup	THS_DR_30_G33.JPG	17/8/2019	3LC		108.26	16.0901
Son Tra	Hon Sup	THS_DR_30_G34.JPG	17/8/2019	3LC		108.26	16.0902
Son Tra	Hon Sup	THS_DR_30_G5.JPG	17/8/2019	3LC	3.4	108.261	16.0899
Son Tra	Hon Sup	THS_DR_31	17/8/2019	3LC	4	108.261	16.0901
Son Tra	Bai But	BBU1_18_P2	15/8/2019	1LC	2.3	108.273	16.0973
Son Tra	Bai But	BBU1_18_P4_G5.JPG	15/8/2019	1LC	2.3	108.273	16.0973
Son Tra	Bai But	BBU1_DR_39_G51.JPG	16/8/2019	1LC	2.3	108.272	16.0976
Son Tra	Bai But	BBU1_DR_54_G5.JPG	15/8/2019	1LC	2.3	108.273	16.0976
Son Tra	Bai Nom	BN_O5_P4_G5.JPG	14/8/2019	1LC	2.3	108.299	16.102
Son Tra	Huc Lo	HL_DR_21_G5.JPG	13/8/2019	1LC	2.3	108.313	16.1125
Son Tra	Vung Da	HL5_DR_02_G5.JPG	12/8/2019	1LC	2.3	108.316	16.1126
Son Tra	Vung Da	MN_O8_P1_G5.JPG	12/8/2019	1LC	2.3	108.325	16.1157
Son Tra	Bai But	BBU1_18_P3	15/8/2019	1LC	2.4	108.273	16.0973
Son Tra	Bai But	BBU1_DR_23_G5.JPG	15/8/2019	1LC	2.4	108.274	16.0973
Son Tra	Hon Sup	THS_DR_36_G11.JPG	17/8/2019	3LC		108.26	16.0897
Son Tra	Hon Sup	THS_DR_36_G1.JPG	17/8/2019	3LC		108.26	16.0897
Son Tra			16/8/2019	D	14.1	108.27	16.0948
Son Tra	Hon Sup	THS_DR_36_G31.JPG	17/8/2019	3LC		108.26	16.09
Son Tra	Hon Sup	THS_DR_36_G32.JPG	17/8/2019	3LC		108.26	16.09
Son Tra	Hon Sup	THS_DR_36_G34.JPG	17/8/2019	3LC		108.26	16.09
Son Tra	Hon Sup	THS_DR_36_G3.JPG	17/8/2019	3LC		108.26	16.09
Son Tra	Hon Sup	THS_DR_36_G30.JPG	17/8/2019	3LC		108.26	16.09
Son Tra			15/8/2019	D	14.1	108.276	16.0962
Son Tra			17/8/2019	D	14.2	108.264	16.0886
Son Tra	Bai But	BBU1_DR_56	15/8/2019	1LC	2.4	108.273	16.0974
Son Tra	Hon Sup	THS_03_P1_G5.JPG	17/8/2019	1LC	2.4	108.262	16.0895
Son Tra	Bai But	BBU1_08_P2_G5.JPG	16/8/2019	1LC	2.5	108.272	16.0974
Son Tra	Bai But	BBU1_08_P5_G5.JPG	16/8/2019	1LC	2.5	108.273	16.0972
Son Tra			16/8/2019	D	14.2	108.272	16.0935
Son Tra	Bai But	BBU1_DR_40_G5.JPG	16/8/2019	1LC	2.5	108.272	16.0974
Son Tra			14/8/2019	D	14.3	108.31	16.0959
Son Tra			15/8/2019	D	14.3	108.274	16.096
Son Tra	Dong Bai Bac	DBB_DR_50_G5.JPG	10/8/2019	1LC	2.5	108.312	16.1402
Son Tra	Bai Nom	BN_O6_P1_G5.JPG	14/8/2019	2LC	2	108.3	16.1014
Son Tra	Bai Nom	BN_O6_P2_G5.JPG	14/8/2019	2LC		108.3	16.1014
Son Tra	Mui Sung	MS_DR_O3_G5.JPG	14/8/2019	1LC	2.5	108.305	16.0959
Son Tra	Hon Sup	THS_10_P5_G5.JPG	17/8/2019	1LC	2.5	108.262	16.0892
Son Tra			16/8/2019	D	14.5	108.27	16.0954
Son Tra	Bai Nom	BN_O6_P3_G5.JPG	14/8/2019	2LC	1.8	108.3	16.1013
Son Tra	Bai Nom	BN_O6_P5_G5.JPG	14/8/2019	2LC	2	108.3	16.1014
Son Tra	Bai Nom	BN_O8_P1_G5.JPG	14/8/2019	2LC	1	108.3	16.1009
Son Tra	Bai Nom	BN_O8_P2_G5.JPG	14/8/2019	2LC	0.9	108.3	16.1009
Son Tra			13/8/2019	D	14.5	108.313	16.1088
Son Tra			15/8/2019	D	14.6	108.275	16.0964
Son Tra	Bai Nom	BN_O8_P4_G5.JPG	14/8/2019	2LC		108.3	16.101
Son Tra	Bai Nom	BN_O8_P5_G5.JPG	14/8/2019	2LC		108.3	16.1009
Son Tra	Hon Sup	THS_DR_45_G2.JPG	17/8/2019	3LC		108.261	16.0884
Son Tra	Hon Sup	THS_19_P2	17/8/2019	1LC	2.5	108.262	16.0886
Son Tra	Hon Sup	THS_DR_45_G5.JPG	17/8/2019	3LC	4.9	108.261	16.0883
Son Tra			8/8/2019	D	14.7	108.289	16.1372
Son Tra	Bai Nom	BN_O9_P1_G5.JPG	14/8/2019	2LC	2.8	108.3	16.1004
Son Tra	Vung Da	BU_01_P5_G2.JPG	12/8/2019	2LC		108.323	16.116
Son Tra	Vung Da	BU_01_P5_G5.JPG	12/8/2019	2LC	2.7	108.323	16.116
Son Tra			16/8/2019	D	15	108.269	16.0945
Son Tra	Vung Da	BU_02_P3_G4.JPG	12/8/2019	2LC		108.322	16.116
Son Tra	Vung Da	BU_DR_04_G3.JPG	12/8/2019	2LC		108.322	16.1161
Son Tra	Vung Da	BU_DR_08_G5.JPG	12/8/2019	2LC		108.322	16.1163
Son Tra	Vung Da	BU_DR_09_G2.JPG	12/8/2019	2LC		108.321	16.1163
Son Tra	Vung Da	BU_DR_09_G4.JPG	12/8/2019	2LC		108.321	16.1162
Son Tra	Mui Nghe		11/8/2019	D	15	108.333	16.1161
Son Tra			14/8/2019	D	15	108.296	16.0997
Son Tra			8/8/2019	D	15.2	108.302	16.1284
Son Tra			14/8/2019	D	15.3	108.307	16.093
Son Tra			17/8/2019	D	15.4	108.264	16.088
Son Tra			16/8/2019	D	15.6	108.27	16.095
Son Tra			14/8/2019	D	15.6	108.297	16.0955
Son Tra	Mui Nghe		14/8/2019	D	15.7	108.295	16.0988
Son Tra			7/8/2019	D	16.1	108.269	16.1435
Son Tra	Mui Nghe		11/8/2019	D	16.1	108.334	16.1169
Son Tra			10/8/2019	D	16.3	108.309	16.139
Son Tra			8/8/2019	D	16.6	108.289	16.1376
Son Tra			16/8/2019	D	16.7	108.27	16.0952
Son Tra			7/8/2019	D	16.7	108.267	16.1468
Son Tra			14/8/2019	D	17	108.308	16.0944
Son Tra			14/8/2019	D	17	108.302	16.0948
Son Tra			9/8/2019	D	17	108.304	16.1295
Son Tra			11/8/2019	D	17.1	108.332	16.116
Son Tra	Dong bai bac		10/8/2019	D	17.1	108.31	16.14
Son Tra			12/8/2019	D	17.1	108.318	16.1097
Son Tra			16/8/2019	D	17.2	108.265	16.09
Son Tra			7/8/2019	D	17.2	108.277	16.1395
Son Tra			11/8/2019	D	17.6	108.335	16.117
Son Tra			11/8/2019	D	17.7	108.332	16.1164
Son Tra			15/8/2019	D	17.7	108.279	16.0931
Son Tra			14/8/2019	D	17.9	108.314	16.099
Son Tra			11/8/2019	D	18	108.336	16.1174
Son Tra			8/8/2019	D	18	108.291	16.1391
Son Tra			11/8/2019	D	18.37	108.339	16.1172
Son Tra			7/8/2019	D	18.6	108.272	16.1414
Son Tra			12/8/2019	D	18.7	108.323	16.1121
Son Tra			14/8/2019	D	18.9	108.295	16.097
Son Tra			8/8/2019	D	19.1	108.301	16.1337
Son Tra			7/8/2019	D	19.1	108.28	16.1395
Son Tra	Mui Gion	MG_O1P1	16/8/2019	3LC		108.268	16.0947
Son Tra			11/8/2019	D	19.3	108.335	16.1161
Son Tra			11/8/2019	D	19.6	108.333	16.113
Son Tra	Mui Gion	MG_O2P9	16/8/2019	3LC		108.269	16.095
Son Tra			14/8/2019	D	19.7	108.301	16.0942
Son Tra	Mui Gion	MG_O2P8	16/8/2019	3LC		108.269	16.095
Son Tra	Mui Gion	MG_O2P1	16/8/2019	3LC		108.269	16.0951
Son Tra	Vung Da	BU_DR_09_G41.JPG	12/8/2019	2LC		108.321	16.1162
Son Tra			13/8/2019	D	19.7	108.314	16.1023
Son Tra	Hon Sup	THS_DR_05_G5.JPG	17/8/2019	1LC	2.5	108.262	16.0895
Son Tra	Hon Sup	THS_DR_09_G5.JPG	17/8/2019	1LC	2.5	108.262	16.0895
Son Tra			7/8/2019	D	19.8	108.274	16.1401
Son Tra	Bai But	BBU1_08_P3_G5.JPG	16/8/2019	1LC	2.6	108.272	16.0974
Son Tra	Vung Da	BU_DR_09_G42.JPG	12/8/2019	2LC		108.321	16.1162
Son Tra	Vung Da	BU_DR_09_G43.JPG	12/8/2019	2LC		108.321	16.1162
Son Tra	Vung Da	BU_DR_09_G44	12/8/2019	2LC		108.321	16.1162
Son Tra	Vung Da	BU_DR_11_G4.JPG	12/8/2019	2LC		108.32	16.1157
Son Tra	Vung Da	BU_DR_14_G1.JPG	12/8/2019	2LC		108.321	16.116
Son Tra	Vung Da	BU_DR_15_G1.JPG	12/8/2019	2LC		108.321	16.1162
Son Tra	Vung Da Ban	VCB4_DR_20_G4.JPG	7/8/2019	HB		108.27	16.1374
Son Tra	Bai Nom	Camera 360	14/8/2019	S	0.5	108.299	16.1042
Son Tra	Bai Nom	Camera 360	14/8/2019	S	0.6	108.298	16.1042
Son Tra	Vung Da Ban	Camera 360	7/8/2019	S	0.8	108.275	16.1337
Son Tra		Camera 360	14/8/2019	S	1.1	108.297	16.1048
Son Tra	Vung Da Ban	VCB4_DR_20_G3.JPG	7/8/2019	HB		108.27	16.1374
Son Tra	Vung Da	BU_DR_15_G2.JPG	12/8/2019	2LC		108.321	16.1162
Son Tra	Vung Da	BU_DR_15_G3.JPG	12/8/2019	2LC		108.32	16.1162
Son Tra	Bai But	BBU1_DR_32_G5.JPG	16/8/2019	1LC	2.6	108.272	16.0974
Son Tra	Bai But	BBU1_DR_46_G5.JPG	16/8/2019	1LC	2.6	108.272	16.0976
Son Tra	Vung Da	BU_DR_15_G4.JPG	12/8/2019	2LC		108.32	16.1161
Son Tra	Vung Da Ban	VCB4_DR_06_G5.JPG	7/8/2019	HB	5.9	108.27	16.1389
Son Tra	Bai But	BBU1_DR_66_G5.JPG	15/8/2019	1LC	2.6	108.273	16.0972
Son Tra			9/8/2019	D	20	108.304	16.1375
Son Tra			13/8/2019	D	20.5	108.315	16.1068
Son Tra			8/8/2019	D	21.3	108.301	16.1387
Son Tra			12/8/2019	D	21.5	108.329	16.1147
Son Tra			12/8/2019	D	21.8	108.326	16.1108
Son Tra			10/8/2019	D	22.4	108.321	16.1453
Son Tra			8/8/2019	D	23	108.3	16.1429
Son Tra	Tay Bai Bac		8/8/2019	D	24	108.285	16.1389
Son Tra			16/8/2019	D		108.267	16.0885
Son Tra			16/8/2019	D		108.267	16.0886
Son Tra			16/8/2019	D		108.267	16.0886
Son Tra			16/8/2019	D		108.267	16.0887
Son Tra			16/8/2019	D		108.267	16.0887
Son Tra	Vung Da Ban	VCB4_02_P2_G5.JPG	7/8/2019	HB		108.27	16.1386
Son Tra	Dong Bai Bac	DBB_DR_51_G5.JPG	10/8/2019	1LC	2.6	108.312	16.1403
Son Tra	Huc Lo	HL_O2_P3_G5.JPG	13/8/2019	1LC	2.6	108.314	16.1123
Son Tra	Mui Nghe	MN_DR_06_G5.JPG	11/8/2019	1LC	2.6	108.334	16.1183
Son Tra	Hon Sup	THS_03_P2_G5.JPG	17/8/2019	1LC	2.6	108.262	16.0894
Son Tra	Bai But	BBU_DR_07_G5.JPG	15/8/2019	3LC	2.4	108.278	16.0974
Son Tra	Bai But	BBU_DR_08_G5.JPG	15/8/2019	3LC	1.3	108.278	16.0975
Son Tra	Vung Da Ban	VCB_DR_12_G5.JPG	7/8/2019	HB		108.277	16.1348
Son Tra	Hon Sup	THS_11_P3_G5.JPG	17/8/2019	1LC	2.6	108.261	16.0886
Son Tra	Hon Sup	THS_DR_20_G5.JPG	17/8/2019	1LC	2.6	108.261	16.0889
Son Tra	Bai Nom	BN_O4_P2_G522.JPG	14/8/2019	S	1.3	108.3	16.1028
Son Tra	Bai But	BBU1_DR_57	15/8/2019	1LC	2.7	108.273	16.0973
Son Tra	Bai Nom	BN_O4_P4_G524.JPG	14/8/2019	S	1.3	108.3	16.1027
Son Tra	Bai But	Camera 360	15/8/2019	S	1.5	108.274	16.0985
Son Tra	Bai Nom	BN_DR_21_G5.JPG	14/8/2019	S	1.6	108.3	16.1025
Son Tra	Bai Nom	BN_O4_P1_G521.JPG	14/8/2019	S	1.6	108.3	16.1027
Son Tra	Bai But	BBU1_10_P2_G5.JPG	16/8/2019	S	1.8	108.272	16.0978
Son Tra	Bai Nom	BN_DR_19_G5.JPG	14/8/2019	S	1.9	108.3	16.1026
Son Tra	Bai Nom	BN_O3_P2_G54.JPG	14/8/2019	S	2.4	108.302	16.0976
Son Tra	Bai Nom	BN_O5_P3_G57.JPG	14/8/2019	S	2.4	108.299	16.1021
Son Tra	Dong Bai Bac	DBB_DR_12_G5.JPG	10/8/2019	1LC	2.7	108.311	16.1333
Son Tra	Vung Da	BU_DR_15_G5.JPG	12/8/2019	2LC	2.8	108.32	16.1162
Son Tra	Dong Bai Bac	DBB_05_P4_G5.JPG	10/8/2019	2LC		108.312	16.1372
Son Tra	Bai But	BBU_DR_23_G4.JPG	15/8/2019	3LC		108.279	16.0971
Son Tra	Bai But	Camera 360	15/8/2019	S	2.5	108.279	16.0971
Son Tra	Bai Nom	BN_DR_11_G5.JPG	14/8/2019	S	2.6	108.301	16.0984
Son Tra	Vung Da Ban	VCB_DR_11_G5.JPG	7/8/2019	HB	4.8	108.276	16.1348
Son Tra	Bai Nom	BN_DR_17_G5.JPG	14/8/2019	S	2.7	108.301	16.098
Son Tra	Bai But	BBU_DR_12_G5.JPG	15/8/2019	S	2.8	108.279	16.0972
Son Tra	Bai But	BBU1_17_P5	15/8/2019	S	3	108.274	16.097
Son Tra	Hon Sup	THS_10_P4_G5.JPG	17/8/2019	1LC	2.7	108.261	16.0893
Son Tra	Bai But	BBU_O1_P1_G5.JPG	15/8/2019	3LC	2.9	108.278	16.0973
Son Tra	Bai But	BBU_O1_P2_G2.JPG	15/8/2019	3LC	2.6	108.278	16.0973
Son Tra	Bai But	BBU_O1_P2_G4.JPG	15/8/2019	3LC		108.278	16.0973
Son Tra	Bai But	BBU_O1_P3_G5.JPG	15/8/2019	3LC	1.9	108.278	16.0973
Son Tra	Bai But	BBU_O1_P4_G5.JPG	15/8/2019	3LC		108.278	16.0973
Son Tra	Bai But	BBU_O1_P5_G5.JPG	15/8/2019	3LC	2.5	108.278	16.0973
Son Tra	Dong Bai Bac	DBB_06_P1_G5.JPG	10/8/2019	2LC	2.4	108.312	16.1375
Son Tra	Bai But	BBU1_01_P4_G5.JPG	15/8/2019	3LC	2	108.276	16.0972
Son Tra	Bai But	BBU1_01_P5_G5.JPG	15/8/2019	3LC	2.1	108.276	16.0973
Son Tra	Hon Sup	THS_19_P5_G5.JPG	17/8/2019	1LC	2.7	108.262	16.0886
Son Tra	Bai But	BBU1_DR_01_G5.JPG	15/8/2019	1LC	2.8	108.276	16.097
Son Tra	Bai But	BBU1_02_P5_G3.JPG	15/8/2019	3LC	6.5	108.276	16.097
Son Tra	Dong Bai Bac	DBB_07_P3_G4.JPG	10/8/2019	2LC		108.312	16.1378
Son Tra	Bai But	BBU1_03_P1_G5.JPG	15/8/2019	3LC	2.5	108.275	16.0974
Son Tra	Bai But	BBU1_03_P2_G3.JPG	15/8/2019	3LC	2.8	108.275	16.0973
Son Tra	Bai But	BBU1_03_P2_G5.JPG	15/8/2019	3LC	2.6	108.275	16.0973
Son Tra	Dong Bai Bac	DBB_07_P4_G5.JPG	10/8/2019	2LC	2.3	108.312	16.1378
Son Tra	Dong Bai Bac	DBB_08_P1_G5.JPG	10/8/2019	2LC	2	108.312	16.1383
Son Tra	Dong Bai Bac	DBB_08_P2_G2.JPG	10/8/2019	2LC		108.312	16.1383
Son Tra	Dong Bai Bac	DBB_08_P3_G5.JPG	10/8/2019	2LC	3.8	108.312	16.1383
Son Tra	Bai But	BBU1_03_P4_G5.JPG	15/8/2019	3LC	2.4	108.275	16.0974
Son Tra	Bai But	BBU1_03_P5_G5.JPG	15/8/2019	3LC		108.275	16.0973
Son Tra	Dong Bai Bac	DBB_08_P4_G5.JPG	10/8/2019	2LC	2.1	108.312	16.1383
Son Tra	Dong Bai Bac	DBB_08_P5_G5.JPG	10/8/2019	2LC	2.9	108.312	16.1383
Son Tra	Bai But	BBU1_04_P2_G21JPG	15/8/2019	3LC		108.275	16.0972
Son Tra	Bai But	BBU1_04_P2_G22.JPG	15/8/2019	3LC		108.275	16.0972
Son Tra	Bai But	BBU1_04_P2_G23.JPG	15/8/2019	3LC		108.275	16.0973
Son Tra	Bai But	BBU1_04_P2_G24.JPG	15/8/2019	3LC		108.275	16.0972
Son Tra	Bai But	BBU1_04_P2_G3.JPG	15/8/2019	3LC		108.275	16.0972
Son Tra	Bai But	BBU1_04_P2_G5.JPG	15/8/2019	3LC	2.9	108.275	16.0972
Son Tra	Bai But	BBU1_04_P3_G3.JPG	15/8/2019	3LC		108.275	16.0973
Son Tra	Bai But	BBU1_04_P3_G5.JPG	15/8/2019	3LC	3	108.275	16.0973
Son Tra	Bai But	BBU1_04_P4_G2.JPG	15/8/2019	3LC		108.275	16.0971
Son Tra	Bai But	BBU1_04_P4_G21JPG	15/8/2019	3LC		108.275	16.0971
Son Tra	Bai But	BBU1_04_P4_G22.JPG	15/8/2019	3LC		108.275	16.0971
Son Tra	Bai But	BBU1_04_P4_G23JPG	15/8/2019	3LC		108.275	16.0971
Son Tra	Dong Bai Bac	DBB_09_P1_G5.JPG	10/8/2019	2LC	1.8	108.312	16.1394
Son Tra	Dong Bai Bac	DBB_09_P2_G5.JPG	10/8/2019	2LC	2.8	108.312	16.1394
Son Tra	Dong Bai Bac	DBB_09_P3_G4.JPG	10/8/2019	2LC		108.312	16.1395
Son Tra	Dong Bai Bac	DBB_09_P3_G4.JPG	10/8/2019	2LC		108.312	16.1396
Son Tra	Dong Bai Bac	DBB_09_P3_G4.JPG	10/8/2019	2LC		108.312	16.1396
Son Tra	Dong Bai Bac	DBB_09_P3_G5.JPG	10/8/2019	2LC	2.4	108.312	16.1396
Son Tra	Dong Bai Bac	DBB_09_P4_G2.JPG	10/8/2019	2LC		108.312	16.1396
Son Tra	Dong Bai Bac	DBB_09_P4_G5.JPG	10/8/2019	2LC	2.1	108.312	16.1394
Son Tra	Bai Nom	BN_DR_14_G5.JPG	14/8/2019	1LC	2.8	108.301	16.0983
Son Tra	Bai Nom	BN_O1_P5_G5.JPG	14/8/2019	1LC	2.8	108.301	16.0988
Son Tra	Dong Bai Bac	DBB_DR_46_G5.JPG	10/8/2019	1LC	2.8	108.312	16.1399
Son Tra	Huc Lo	HL7_02_P5_G5.JPG	13/8/2019	1LC	2.8	108.309	16.1053
Son Tra	Hon Sup	THS_08_P5_G5.JPG	17/8/2019	1LC	2.8	108.261	16.09
Son Tra	Bai But	BBU1_DR_06_G3.JPG	15/8/2019	1LC	2.9	108.275	16.0972
Son Tra	Dong Bai Bac	DBB_06_P4_G5.JPG	10/8/2019	1LC	2.9	108.312	16.1375
Son Tra	Bai But	BBU1_06_P4_G5.JPG	15/8/2019	3LC	4.5	108.274	16.0967
Son Tra	Dong Bai Bac	DBB_DR_59_G4.JPG	10/8/2019	1LC	2.9	108.315	16.1431
Son Tra	Mui Nghe	MN_O1_P3_G5.JPG	11/8/2019	1LC	2.9	108.335	16.1182
Son Tra	Hon Sup	THS_10_P2_G5.JPG	17/8/2019	1LC	2.9	108.261	16.0893
Son Tra	Dong Bai Bac	DBB_09_P5_G3.JPG	10/8/2019	2LC		108.312	16.1394
Son Tra	Dong Bai Bac	DBB_09_P5_G5.JPG	10/8/2019	2LC	2.6	108.312	16.1394
Son Tra	Hon Sup	THS_19_P3_G4.JPG	17/8/2019	1LC	2.9	108.262	16.0887
Son Tra	Hon Sup	THS_DR_35_G5.JPG	17/8/2019	1LC	2.9	108.261	16.09
Son Tra	Vung Da Ban	VCB_04_P4_G5.JPG	7/8/2019	1LC	2.9	108.277	16.1352
Son Tra	Bai But	BBU1_08_P4_G5.JPG	16/8/2019	1LC	3	108.272	16.0974
Son Tra	Bai Nom	BN_DR_30_G5.JPG	14/8/2019	S	3	108.299	16.1021
Son Tra	Bai But	BBU1_17_P1	15/8/2019	1LC	3	108.274	16.097
Son Tra	Bai But	BBU1_DR_30_G5.JPG	15/8/2019	1LC	3	108.274	16.0972
Son Tra	Dong Bai Bac	DBB_08_P2_G5.JPG	10/8/2019	1LC	3	108.312	16.1383
Son Tra	Dong Bai Bac	DBB_DR_32_G5.JPG	10/8/2019	1LC	3	108.312	16.1379
Son Tra	Dong Bai Bac	DBB_DR_47_G5.JPG	10/8/2019	1LC	3	108.312	16.1399
Son Tra	Hon Sup	THS_DR_37_G51.JPG	17/8/2019	1LC	3	108.26	16.0893
Son Tra	Vung Da Ban	VCB_DR_09_G3.JPG	7/8/2019	HB		108.276	16.1345
Son Tra	Vung Da Ban	VCB_DR_08_G5.JPG	7/8/2019	HB	5	108.276	16.1346
Son Tra	Vung Da Ban	Camera 360	7/8/2019	S	3	108.275	16.1339
Son Tra	Bai But	BBU1_DR_65	15/8/2019	S	3.2	108.274	16.0969
Son Tra	Bai But	BBU1_12_P3_G5.JPG	16/8/2019	S	3.5	108.272	16.0974
Son Tra	Bai But	Camera 360	15/8/2019	S	3.6	108.275	16.097
Son Tra	Bai But	Camera 360	15/8/2019	S	3.6	108.275	16.0971
Son Tra	Bai Nom	BN_DR_13_G5.JPG	14/8/2019	S	3.7	108.301	16.0982
Son Tra	Vung Da Ban	VCB_DR_06_G4.JPG	7/8/2019	HB		108.276	16.1345
Son Tra	Vung Da Ban	VCB_04_P3_G5.JPG	7/8/2019	HB		108.277	16.1353
Son Tra	Bai But	BBU1_11_P1_G5.JPG	16/8/2019	3LC	3.1	108.272	16.0972
Son Tra	Vung Da Ban	VCB_04_P5_G5.JPG	7/8/2019	1LC	3	108.277	16.1352
Son Tra	Bai But	BBU1_11_P2_G2.JPG	16/8/2019	3LC		108.272	16.0972
Son Tra	Bai But	BBU1_11_P2_G3.JPG	16/8/2019	3LC		108.272	16.0972
Son Tra	Bai But	BBU1_11_P3_G3.JPG	16/8/2019	3LC		108.272	16.0971
Son Tra	Bai But	BBU1_DR_45_G5.JPG	16/8/2019	1LC	3.1	108.272	16.0976
Son Tra	Bai But	BBU1_11_P5_G5.JPG	16/8/2019	3LC	3.4	108.272	16.0972
Son Tra	Bai But	BBU1_11_P5_G5.JPG	16/8/2019	3LC	3.4	108.272	16.0972
Son Tra	Bai But	BBU1_12_P1_G5.JPG	16/8/2019	3LC	3.3	108.272	16.0974
Son Tra	Bai Nom	BN_DR_64_G5.JPG	14/8/2019	1LC	3.1	108.299	16.1013
Son Tra	Bai But	BBU1_DR_64	15/8/2019	S	3.9	108.274	16.0966
Son Tra	Bai Nom	BN_DR_85_G5.JPG	14/8/2019	1LC	3.1	108.3	16.1
Son Tra	Bai Nom	BN_O9_P2_G5.JPG	14/8/2019	1LC	3.1	108.3	16.1004
Son Tra	Bai Nom	BN_DR_331	14/8/2019	S	4.2	108.299	16.1018
Son Tra	Mui Sung	MS_DR_O4_G4.JPG	14/8/2019	1LC	3.1	108.306	16.0959
Son Tra	Hon Sup	THS_17_P3_G5.JPG	17/8/2019	1LC	3.1	108.26	16.0895
Son Tra	Hon Sup	THS_19_P4_G5.JPG	17/8/2019	1LC	3.1	108.262	16.0886
Son Tra	Bai But	BBU1_08_P1_G5.JPG	16/8/2019	1LC	3.2	108.273	16.0973
Son Tra	Bai But	BBU1_DR_24_G5.JPG	15/8/2019	1LC	3.2	108.274	16.0973
Son Tra	Bai Nom	BN_DR_54_G5.JPG	14/8/2019	1LC	3.2	108.299	16.1015
Son Tra	Bai Nom	BN_O1_P3_G5.JPG	14/8/2019	1LC	3.2	108.301	16.0988
Son Tra	Dong Bai Bac	DBB_DR_35_G5.JPG	10/8/2019	1LC	3.2	108.312	16.1381
Son Tra	Dong Bai Bac	DBB_DR_43_G5.JPG	10/8/2019	1LC	3.2	108.312	16.1397
Son Tra	Vung Da Ban	VCB_03_P5_G5.JPG	7/8/2019	HB	3	108.277	16.1349
Son Tra	Dong Bai Bac	DBB_DR_43_G52.JPG	10/8/2019	1LC	3.2	108.312	16.1397
Son Tra	Vung Da	HL5_03_P1_G5.JPG	12/8/2019	1LC	3.2	108.317	16.1135
Son Tra	Mui Sung	MS_O1_P4_G5.JPG	14/8/2019	1LC	3.2	108.305	16.0957
Son Tra	Huc Lo	HL7_01_P1_G5.JPG	13/8/2019	1LC	3.3	108.31	16.1046
Son Tra	Bai But	BBU1_15_P2	15/8/2019	3LC	4.1	108.273	16.0967
Son Tra	Bai But	BBU1_15_P21	15/8/2019	3LC		108.274	16.0967
Son Tra	Hon Sup	THS_02_P1_G5.JPG	17/8/2019	1LC	3.3	108.262	16.0896
Son Tra	Hon Sup	THS_08_P2_G5.JPG	17/8/2019	1LC	3.3	108.261	16.09
Son Tra	Bai Nom	BN_O9_P4_G5.JPG	14/8/2019	1LC	3.4	108.3	16.1004
Son Tra	Bai But	BBU1_16_P1	15/8/2019	3LC	4.4	108.274	16.0965
Son Tra	Bai But	BBU1_16_P2	15/8/2019	3LC	4	108.274	16.0966
Son Tra	Bai But	BBU1_16_P3_G5.JPG	15/8/2019	3LC		108.274	16.0965
Son Tra	Bai But	BBU1_16_P4	15/8/2019	3LC	4.3	108.274	16.0965
Son Tra	Bai But	BBU1_16_P5	15/8/2019	3LC	3.6	108.274	16.0965
Son Tra	Dong Bai Bac	DBB_10_P1_G4.JPG	10/8/2019	2LC		108.312	16.1399
Son Tra	Huc Lo	HL_O1_P3_G5.JPG	13/8/2019	1LC	3.4	108.314	16.1121
Son Tra	Bai But	BBU1_17_P2	15/8/2019	3LC	2.7	108.274	16.0972
Son Tra	Bai But	BBU1_17_P31	15/8/2019	3LC	3.1	108.274	16.0972
Son Tra	Bai But	BBU1_17_P32	15/8/2019	3LC		108.274	16.0972
Son Tra	Bai But	BBU1_17_P33	15/8/2019	3LC		108.274	16.0972
Son Tra	Bai But	BBU1_17_P34	15/8/2019	3LC		108.274	16.0972
Son Tra	Hon Sup	THS_DR_36_G5.JPG	17/8/2019	1LC	3.4	108.26	16.0895
Son Tra	Bai But	BBU_DR_15	15/8/2019	S	4.3	108.279	16.097
Son Tra	Bai But	BBU1_17_P4	15/8/2019	1LC	3.5	108.274	16.097
Son Tra	Bai But	BBU1_DR_59_G5.JPG	15/8/2019	1LC	3.5	108.273	16.0969
Son Tra	Vung Da	MN_O7_P1_G5.JPG	12/8/2019	1LC	3.5	108.326	16.1153
Son Tra	Hon Sup	THS_03_P3_G5.JPG	17/8/2019	1LC	3.5	108.262	16.0894
Son Tra	Hon Sup	THS_03_P5_G5.JPG	17/8/2019	1LC	3.5	108.262	16.0895
Son Tra	Hon Sup	THS_16_P3_G5.JPG	17/8/2019	1LC	3.5	108.261	16.0898
Son Tra	Dong Bai Bac	DBB_10_P1_G5.JPG	10/8/2019	2LC	2.7	108.312	16.1399
Son Tra	Vung Da Ban	VCB_03_P2_G5.JPG	7/8/2019	1LC	3.5	108.277	16.1348
Son Tra	Bai But	BBU1_DR_06_G5.JPG	15/8/2019	3LC		108.275	16.0973
Son Tra	Bai But	BBU1_DR_07_G2.JPG	15/8/2019	3LC		108.276	16.0972
Son Tra	Bai But	BBU1_DR_07_G3.JPG	15/8/2019	3LC	2.5	108.275	16.0973
Son Tra	Dong Bai Bac	DBB_10_P2_G4.JPG	10/8/2019	2LC		108.312	16.14
Son Tra	Bai But	BBU1_11_P3_G5.JPG	16/8/2019	1LC	3.6	108.272	16.0971
Son Tra	Huc Lo	HL_O2_P1_G5.JPG	13/8/2019	1LC	3.6	108.314	16.1123
Son Tra	Dong Bai Bac	DBB_10_P2_G5.JPG	10/8/2019	2LC	2.5	108.312	16.14
Son Tra	Bai But	BBU1_DR_12_G2_3.JPG	15/8/2019	3LC		108.275	16.0973
Son Tra	Bai But	BBU1_DR_12_G5.JPG	15/8/2019	3LC	2.9	108.275	16.0973
Son Tra	Bai But	BBU1_DR_15_G5.JPG	15/8/2019	3LC		108.275	16.0971
Son Tra	Dong Bai Bac	DBB_10_P3_G5.JPG	10/8/2019	2LC	2.2	108.312	16.14
Son Tra	Huc Lo	HL7_DR_10_G5.JPG	13/8/2019	1LC	3.6	108.309	16.1048
Son Tra	Bai But	BBU1_DR_17_G5.JPG	15/8/2019	3LC	2.5	108.275	16.0974
Son Tra	Mui Nghe	MN_DR_22	12/8/2019	1LC	3.6	108.329	16.1159
Son Tra	Dong Bai Bac	DBB_10_P4_G3.JPG	10/8/2019	2LC		108.312	16.14
Son Tra	Hon Sup	THS_DR_28_G5.JPG	17/8/2019	1LC	3.6	108.261	16.0895
Son Tra	Dong Bai Bac	DBB_10_P4_G4.JPG	10/8/2019	2LC		108.312	16.1399
Son Tra	Dong Bai Bac	DBB_DR_37_G5.JPG	10/8/2019	1LC	3.7	108.312	16.1383
Son Tra	Dong Bai Bac	DBB_10_P4_G5.JPG	10/8/2019	2LC	2.8	108.312	16.14
Son Tra	Huc Lo	HL_DR_06_G5.JPG	13/8/2019	1LC	3.7	108.314	16.1123
Son Tra	Vung Da	HL5_03_P4_G5.JPG	12/8/2019	1LC	3.7	108.317	16.1135
Son Tra	Huc Lo	HL7_03_P5_G5.JPG	13/8/2019	1LC	3.7	108.309	16.1055
Son Tra	Hon Sup	THS_DR_34_G5.JPG	17/8/2019	1LC	3.7	108.261	16.09
Son Tra	Vung Da Ban	VCB4_DR_03_G5.JPG	7/8/2019	1LC	3.7	108.266	16.1426
Son Tra	Bai But	BBU1_DR_25_G21JPG	15/8/2019	3LC		108.274	16.0972
Son Tra	Bai But	BBU1_DR_25_G4.JPG	15/8/2019	3LC		108.274	16.0972
Son Tra	Bai But	BBU1_DR_25_G51.JPG	15/8/2019	3LC		108.274	16.0972
Son Tra	Bai But	BBU1_DR_25_G52.JPG	15/8/2019	3LC		108.275	16.0973
Son Tra	Bai But	BBU1_DR_25_G53.JPG	15/8/2019	3LC	3.4	108.275	16.0972
Son Tra	Bai But	BBU1_06_P1_G5.JPG	15/8/2019	1LC	3.8	108.274	16.0968
Son Tra	Bai But	BBU1_DR_27_G2.JPG	15/8/2019	3LC		108.274	16.0969
Son Tra	Bai But	BBU1_DR_27_G21JPG	15/8/2019	3LC		108.274	16.097
Son Tra	Bai But	BBU1_DR_27_G52.JPG	15/8/2019	3LC		108.274	16.0969
Son Tra	Bai But	BBU1_DR_43_G5.JPG	16/8/2019	1LC	3.8	108.272	16.0972
Son Tra	Bai But	BBU1_DR_28_G5.JPG	15/8/2019	3LC	3.8	108.274	16.097
Son Tra	Bai Nom	BN_DR_02_G5.JPG	14/8/2019	1LC	3.8	108.3	16.0988
Son Tra	Bai But	BBU1_DR_29_G51.JPG	15/8/2019	3LC	3.5	108.274	16.097
Son Tra	Bai Nom	BN_DR_84_G5.JPG	14/8/2019	1LC	3.8	108.3	16.1001
Son Tra	Bai But	BBU1_DR_31_G12JPG	16/8/2019	3LC		108.273	16.0971
Son Tra	Bai But	BBU1_DR_31_G13.JPG	16/8/2019	3LC		108.273	16.0971
Son Tra	Bai But	BBU1_DR_31_G2.JPG	16/8/2019	3LC		108.273	16.0971
Son Tra	Bai But	BBU1_DR_31_G3.JPG	16/8/2019	3LC		108.273	16.0971
Son Tra	Bai But	BBU1_DR_31_G5.JPG	16/8/2019	3LC		108.273	16.0971
Son Tra	Dong Bai Bac	DBB_DR_40_G5.JPG	10/8/2019	1LC	3.8	108.312	16.1392
Son Tra	Vung Da	HL5_DR_09_G5.JPG	12/8/2019	1LC	3.8	108.317	16.1133
Son Tra	Tay Bai Bac	TBB5_02_P1_G5.JPG	8/8/2019	1LC	3.8	108.296	16.131
Son Tra	Vung Da Ban	VCB_03_P5_G4.JPG	7/8/2019	HB		108.277	16.1349
Son Tra	Bai But	BBU1_DR_60	15/8/2019	S	4.3	108.274	16.0966
Son Tra	Tay Bai Bac	TBB5_02_P3_G5.JPG	8/8/2019	1LC	3.8	108.296	16.1311
Son Tra	Hon Sup	THS_03_P4_G5.JPG	17/8/2019	1LC	3.8	108.262	16.0895
Son Tra	Hon Sup	THS_07_P1_G5.JPG	17/8/2019	1LC	3.8	108.262	16.0901
Son Tra	Bai But	BBU1_15_P4	15/8/2019	1LC	3.9	108.274	16.0968
Son Tra	Dong Bai Bac	DBB_O4_P5_G5.JPG	10/8/2019	1LC	3.9	108.312	16.1348
Son Tra	Huc Lo	HL_O5_P1_G5.JPG	13/8/2019	1LC	3.9	108.312	16.112
Son Tra	Vung Da	HL5_01_P5_G5.JPG	12/8/2019	1LC	3.9	108.317	16.1128
Son Tra	Vung Da	HL5_DR_12_G5.JPG	12/8/2019	1LC	3.9	108.318	16.1135
Son Tra	Huc Lo	HL7_02_P2_G5.JPG	13/8/2019	1LC	3.9	108.309	16.1053
Son Tra	Hon Sup	THS_08_P1_G5.JPG	17/8/2019	1LC	3.9	108.261	16.09
Son Tra	Vung Da Ban	VCB_04_P1_G5.JPG	7/8/2019	1LC	3.9	108.277	16.1352
Son Tra	Dong Bai Bac	DBB_10_P5_G4.JPG	10/8/2019	2LC		108.312	16.1399
Son Tra	Bai But	BBU1_15_P5	15/8/2019	1LC	4	108.274	16.0967
Son Tra	Bai Nom	BN_O1_P4_G5.JPG	14/8/2019	1LC	4	108.301	16.0987
Son Tra	Vung Da Ban	VCB_03_P5_G3.JPG	7/8/2019	HB		108.277	16.1349
Son Tra	Vung Da Ban	VCB_03_P5_G2.JPG	7/8/2019	HB		108.277	16.1349
Son Tra	Vung Da Ban	VCB_03_P3_G4.JPG	7/8/2019	HB		108.277	16.1349
Son Tra	Vung Da Ban	VCB_03_P3_G3.JPG	7/8/2019	HB		108.277	16.1349
Son Tra	Vung Da Ban	VCB_02_P5_G5.JPG	7/8/2019	HB	2.1	108.277	16.1344
Son Tra	Vung Da Ban	VCB_02_P2_G5.JPG	7/8/2019	HB	2	108.277	16.1345
Son Tra	Dong Bai Bac	DBB_DR_30_G4.JPG	10/8/2019	1LC	4	108.312	16.1378
Son Tra	Huc Lo	HL_DR_34_G5.JPG	13/8/2019	1LC	4	108.312	16.1118
Son Tra	Dong Bai Bac	DBB_10_P5_G5.JPG	10/8/2019	2LC	2.5	108.312	16.1399
Son Tra	Vung Da Ban	VCB_DR_17_G5.JPG	7/8/2019	1LC	4	108.274	16.134
Son Tra	Huc Lo	HL_DR_2	13/8/2019	1LC	4.1	108.314	16.1122
Son Tra	Huc Lo	HL_O5_P4_G5.JPG	13/8/2019	1LC	4.1	108.312	16.1119
Son Tra	Huc Lo	HL7_DR_03_G5.JPG	13/8/2019	1LC	4.1	108.31	16.1041
Son Tra	Bai But	BBU1_DR_58	15/8/2019	3LC	2.3	108.273	16.097
Son Tra	Dong Bai Bac	DBB_11_P1_G5.JPG	10/8/2019	2LC	3.8	108.314	16.1429
Son Tra	Bai But	BBU1_DR_581	15/8/2019	3LC		108.273	16.097
Son Tra	Bai But	BBU1_DR_582	15/8/2019	3LC		108.273	16.097
Son Tra	Bai But	BBU1_DR_583	15/8/2019	3LC		108.273	16.097
Son Tra	Bai But	BBU1_DR_584	15/8/2019	3LC		108.273	16.0969
Son Tra	Hon Sup	THS_07_P2_G5.JPG	17/8/2019	1LC	4.1	108.262	16.0901
Son Tra	Bai But	BBU_DR_14	15/8/2019	S	4.5	108.279	16.0969
Son Tra	Dong Bai Bac	DBB_11_P3_G5.JPG	10/8/2019	2LC		108.314	16.1429
Son Tra	Dong Bai Bac	DBB_11_P4_G5.JPG	10/8/2019	2LC	3.1	108.314	16.1429
Son Tra	Bai But	BBU1_DR_62_75.JPG	15/8/2019	3LC		108.273	16.0971
Son Tra	Dong Bai Bac	DBB_11_P5	10/8/2019	2LC	3.9	108.314	16.1428
Son Tra	Bai But	BBU1_DR_62_8.JPG	15/8/2019	3LC		108.273	16.0971
Son Tra	Tay Bai Bac	TBB5_DR_21_G2.JPG	8/8/2019	HB		108.296	16.1317
Son Tra	Tay Bai Bac	TBB5_DR_19_G3.JPG	8/8/2019	HB		108.296	16.1316
Son Tra	Bai But	BBU1_DR_62_85.JPG	15/8/2019	3LC		108.273	16.097
Son Tra	Dong Bai Bac	DBB_11_P5_G3.JPG	10/8/2019	2LC		108.314	16.1429
Son Tra	Tay Bai Bac	TBB5_DR_16_G1.JPG	8/8/2019	HB		108.296	16.1313
Son Tra	Dong Bai Bac	DBB_DR_05_G1.JPG	9/8/2019	2LC		108.309	16.1292
Son Tra	Dong Bai Bac	DBB_DR_05_G2.JPG	9/8/2019	2LC		108.309	16.1292
Son Tra	Dong Bai Bac	DBB_DR_05_G3.JPG	9/8/2019	2LC		108.309	16.1292
Son Tra	Dong Bai Bac	DBB_DR_05_G4.JPG	9/8/2019	2LC		108.309	16.1292
Son Tra	Dong Bai Bac	DBB_DR_05_G5.JPG	9/8/2019	2LC		108.309	16.1292
Son Tra	Bai But	BBU1_DR_62_95.JPG	15/8/2019	3LC		108.273	16.097
Son Tra	Bai But	BBU1_DR_62_G6.JPG	15/8/2019	3LC	4.5	108.273	16.097
Son Tra	Dong Bai Bac	DBB_DR_06_G5.JPG	9/8/2019	2LC		108.31	16.1317
Son Tra	Bai But	BBU_DR_13	15/8/2019	S	4.8	108.279	16.097
Son Tra	Dong Bai Bac	DBB_DR_15_G1.JPG	10/8/2019	2LC		108.312	16.1342
Son Tra	Dong Bai Bac	DBB_O1_P3_G5.JPG	10/8/2019	S	4.9	108.311	16.1333
Son Tra	Vung Da Ban	VCB_DR_10_G5.JPG	7/8/2019	1LC	4.1	108.277	16.1347
Son Tra	Vung Da Ban	VCB4_03_P1_G5.JPG	7/8/2019	1LC	4.1	108.27	16.1375
Son Tra	Bai Nom	BN_DR_33	14/8/2019	1LC	4.2	108.299	16.1018
Son Tra	Vung Da Ban	VCB4_03_P5_G5.JPG	7/8/2019	S	4.9	108.27	16.1376
Son Tra	Dong Bai Bac	DBB_O4_P2_G5.JPG	10/8/2019	1LC	4.2	108.312	16.1348
Son Tra	Mui Nghe	MN_DR_23_G5.JPG	12/8/2019	1LC	4.2	108.328	16.1156
Son Tra	Vung Da Ban	VCB_03_P1_G5.JPG	7/8/2019	1LC	4.2	108.277	16.1349
Son Tra	Vung Da	BU_DR_14_G5.JPG	12/8/2019	S	5.2	108.32	16.116
Son Tra	Bai Nom	BN_O7_P3_G5.JPG	14/8/2019	1LC	4.3	108.299	16.1013
Son Tra	Mui Nghe	MN_O2_P3_G5.JPG	11/8/2019	1LC	4.3	108.334	16.1183
Son Tra	Hon Sup	THS_DR_33_G5.JPG	17/8/2019	1LC	4.3	108.261	16.09
Son Tra	Huc Lo	HL7_DR_27_G5.JPG	13/8/2019	S	5.9	108.31	16.1053
Son Tra	Bai Nom	BN_DR_56_G5.JPG	14/8/2019	S	6.1	108.299	16.1015
Son Tra	Vung Da Ban	Camera 360	7/8/2019	S	6.4	108.276	16.134
Son Tra	Huc Lo	HL_DR_24_G5.JPG	13/8/2019	S	7.2	108.313	16.1119
Son Tra	Vung Da	BU_DR_6	12/8/2019	S	8.3	108.322	16.1159
Son Tra	Vung Da	BU_DR_1	12/8/2019	S	13.1	108.323	16.1157
Son Tra	Mui Sung	Camera 360	14/8/2019	S		108.304	16.0956
Son Tra	Dong Bai Bac	DBB_DR_15_G2.JPG	10/8/2019	2LC		108.312	16.1342
Son Tra	Vung Da Ban	VCB4_02_P5_G5.JPG	7/8/2019	1LC	4.3	108.27	16.1385
Son Tra	Vung Da Ban	VCB4_03_P4_G5.JPG	7/8/2019	1LC	4.3	108.27	16.1376
Son Tra	Bai But	BBU1_15_P3	15/8/2019	1LC	4.4	108.274	16.0967
Son Tra	Dong Bai Bac	DBB_DR_15_G3.JPG	10/8/2019	2LC		108.312	16.1342
Son Tra	Dong Bai Bac	DBB_DR_18_G5.JPG	10/8/2019	1LC	4.4	108.312	16.1345
Son Tra	Vung Da	HL5_DR_03_G5.JPG	12/8/2019	1LC	4.4	108.316	16.1127
Son Tra	Mui Sung	MS_DR_O6_G5.JPG	14/8/2019	1LC	4.4	108.308	16.0964
Son Tra	Mui Sung	Camera 360	14/8/2019	S		108.304	16.0955
Son Tra	Bai But	BBU_DR_12_G21.JPG	15/8/2019	S		108.279	16.0971
Son Tra	Tay Bai Bac	TBB_DR_06_G5.JPG	8/8/2019	1LC	4.4	108.3	16.126
Son Tra	Bai But	BBU_DR_131	15/8/2019	S		108.279	16.0971
Son Tra	Bai But	BBU_DR_132	15/8/2019	S		108.279	16.0971
Son Tra	Bai But	BBU_DR_133	15/8/2019	S		108.279	16.0971
Son Tra	Bai But	BBU_DR_134	15/8/2019	S		108.279	16.0971
Son Tra	Huc Lo	HL7_03_P2_G5.JPG	13/8/2019	1LC	4.5	108.31	16.1055
Son Tra	Tay Bai Bac	TBB5_DR_08_G5.JPG	8/8/2019	HB	2.6	108.296	16.131
Son Tra	Tay Bai Bac	TBB_O2_P1_G5.JPG	8/8/2019	1LC	4.5	108.3	16.1263
Son Tra	Bai But	BBU_DR_24_G5.JPG	15/8/2019	S		108.28	16.097
Son Tra	Bai But	BBU_DR_25_G5.JPG	15/8/2019	S		108.28	16.097
Son Tra	Bai But	BBU_DR_27_G5.JPG	15/8/2019	S		108.28	16.097
Son Tra	Bai But	BBU_DR_28_G5.JPG	15/8/2019	S		108.28	16.0971
Son Tra	Tay Bai Bac	TBB5_DR_06_G5.JPG	8/8/2019	HB	2.3	108.296	16.1308
Son Tra	Bai But	BBU_DR_29_G5.JPG	15/8/2019	S		108.28	16.0972
Son Tra	Tay Bai Bac	TBB5_DR_04_G1.JPG	8/8/2019	HB		108.297	16.1309
Son Tra	Dong Bai Bac	DBB_DR_15_G4.JPG	10/8/2019	2LC		108.312	16.1342
Son Tra	Vung Da Ban	VCB4_03_P3_G5.JPG	7/8/2019	1LC	4.5	108.27	16.1376
Son Tra	Bai But	BBU1_02_P1_G3.JPG	15/8/2019	1LC	4.6	108.276	16.097
Son Tra	Bai But	BBU1_08_P2_G4.JPG	16/8/2019	S		108.272	16.0973
Son Tra	Dong Bai Bac	DBB_DR_10_G5.JPG	10/8/2019	1LC	4.6	108.311	16.1331
Son Tra	Vung Da Ban	VCB4_02_P3_G5.JPG	7/8/2019	1LC	4.6	108.27	16.1385
Son Tra	Bai But	BBU1_09_P5_G5.JPG	16/8/2019	S		108.272	16.0978
Son Tra	Bai Nom	BN_O7_P5_G5.JPG	14/8/2019	1LC	4.7	108.299	16.1013
Son Tra	Dong Bai Bac	DBB_DR_15_G5.JPG	10/8/2019	2LC	5.2	108.312	16.1342
Son Tra	Dong Bai Bac	DBB_DR_19_G5.JPG	10/8/2019	2LC		108.312	16.1345
Son Tra	Tay Bai Bac	TBB_O3_P4_G5.JPG	8/8/2019	1LC	4.7	108.3	16.1255
Son Tra	Dong Bai Bac	DBB_DR_20_G1.JPG	10/8/2019	2LC		108.312	16.1367
Son Tra	Dong Bai Bac	DBB_DR_24	10/8/2019	2LC	5	108.312	16.1372
Son Tra	Dong Bai Bac	DBB_DR_26_G5.JPG	10/8/2019	2LC	1.6	108.312	16.1374
Son Tra	Dong Bai Bac	DBB_DR_27_G3.JPG	10/8/2019	2LC		108.312	16.1374
Son Tra	Vung Da Ban	VCB4_03_P2_G5.JPG	7/8/2019	1LC	4.7	108.27	16.1375
Son Tra	Tay Bai Bac	TBB_O3_P3_G2.JPG	8/8/2019	HB		108.3	16.1255
Son Tra	Tay Bai Bac	TBB_O2_P5_G1.JPG	8/8/2019	HB		108.3	16.1263
Son Tra	Tay Bai Bac	TBB_O1_P5_G4.JPG	8/8/2019	HB		108.299	16.1272
Son Tra	Dong Bai Bac	DBB_DR_27_G5.JPG	10/8/2019	2LC	2.1	108.312	16.1374
Son Tra	Dong Bai Bac	DBB_O1_P1_G5.JPG	10/8/2019	1LC	4.8	108.311	16.1331
Son Tra	Dong Bai Bac	DBB_DR_29_G2.JPG	10/8/2019	2LC		108.312	16.1375
Son Tra	Huc Lo	HL7_DR_13_G5.JPG	13/8/2019	1LC	4.8	108.31	16.1051
Son Tra	Dong Bai Bac	DBB_DR_38_G3.JPG	10/8/2019	2LC		108.312	16.1382
Son Tra	Dong Bai Bac	DBB_DR_41_G5.JPG	10/8/2019	2LC	1.6	108.312	16.1392
Son Tra	Dong Bai Bac	DBB_DR_42_G5.JPG	10/8/2019	2LC	1.9	108.312	16.1396
Son Tra	Tay Bai Bac	TBB_DR_19_G5.JPG	8/8/2019	HB		108.302	16.1253
Son Tra	Vung Da Ban	VCB4_DR_20_G5.JPG	7/8/2019	1LC	4.8	108.27	16.1374
Son Tra	Dong Bai Bac	DBB_DR_49_G5.JPG	10/8/2019	2LC	2.3	108.312	16.1401
Son Tra	Vung Da	BBU_O2_P1_G5.JPG	12/8/2019	3LC		108.323	16.116
Son Tra	Bai But	BBU1_09_P5_G51.JPG	16/8/2019	S		108.272	16.0977
Son Tra	Dong Bai Bac	DBB_DR_59_G5.JPG	10/8/2019	2LC	2.8	108.314	16.143
Son Tra	Dong Bai Bac	DBB_DR_65_G31.JPG	10/8/2019	2LC		108.314	16.1431
Son Tra	Dong Bai Bac	DBB_DR_65_G32.JPG	10/8/2019	2LC		108.314	16.1431
Son Tra	Tay Bai Bac	TBB_DR_17_G5.JPG	8/8/2019	HB		108.302	16.1252
Son Tra	Vung Da Ban	VCB4_01_P3_G5.JPG	7/8/2019	1LC	4.9	108.27	16.1389
Son Tra	Dong Bai Bac	DBB_DR_65_G33.JPG	10/8/2019	2LC		108.314	16.1431
Son Tra	Vung Da	BBU_O2_P3_G5.JPG	12/8/2019	3LC		108.323	16.116
Son Tra	Bai But	BBU1_DR_42_G5.JPG	16/8/2019	1LC	5	108.272	16.0971
Son Tra	Dong Bai Bac	DBB_06_P5_G3.JPG	10/8/2019	1LC	5	108.312	16.1375
Son Tra	Tay Bai Bac	TBB_DR_15_G5.JPG	8/8/2019	HB		108.302	16.1254
Son Tra	Bai But	BBU1_DR_37_G5.JPG	16/8/2019	S		108.272	16.0981
Son Tra	Bai Nom	BN_DR_01_G5.JPG	14/8/2019	S		108.3	16.0988
Son Tra	Dong Bai Bac	DBB_DR_04_G5.JPG	9/8/2019	1LC	5	108.309	16.1294
Son Tra	Vung Da Ban	VCB4_DR_02_G5.JPG	7/8/2019	1LC	5	108.27	16.1392
Son Tra	Huc Lo	HL7_03_P3_G5.JPG	13/8/2019	1LC	5.1	108.31	16.1055
Son Tra	Dong Bai Bac	DBB_DR_65_G34.JPG	10/8/2019	2LC		108.314	16.1431
Son Tra	Tay Bai Bac	TBB_DR_11_G5.JPG	8/8/2019	HB		108.301	16.1253
Son Tra	Dong Bai Bac	DBB_DR_65_G51JPG	10/8/2019	2LC	5	108.314	16.1431
Son Tra	Dong Bai Bac	DBB_O2_P4_G1.JPG	10/8/2019	2LC		108.311	16.1335
Son Tra	Tay Bai Bac	TBB_DR_10_G5.JPG	8/8/2019	HB		108.301	16.1252
Son Tra	Dong Bai Bac	DBB_O2_P4_G2.JPG	10/8/2019	2LC		108.311	16.1336
Son Tra	Dong Bai Bac	DBB_O2_P4_G3.JPG	10/8/2019	2LC		108.311	16.1336
Son Tra	Tay Bai Bac	TBB_DR_04_G5.JPG	8/8/2019	HB		108.299	16.1265
Son Tra	Dong Bai Bac	DBB_O2_P4_G4.JPG	10/8/2019	2LC		108.311	16.1335
Son Tra	Dong Bai Bac	DBB_O2_P4_G5.JPG	10/8/2019	2LC	6	108.311	16.1336
Son Tra	Dong Bai Bac	DBB_O3_P1_G4.JPG	10/8/2019	2LC		108.311	16.134
Son Tra	Huc Lo	HL7_DR_02_G5.JPG	13/8/2019	1LC	5.1	108.31	16.1042
Son Tra	Dong Bai Bac	DBB_O3_P1_G5.JPG	10/8/2019	2LC	4.8	108.311	16.134
Son Tra	Dong Bai Bac	DBB_O3_P2_G3.JPG	10/8/2019	2LC		108.311	16.134
Son Tra	Dong Bai Bac	DBB_DR_01_G5.JPG	9/8/2019	1LC	5.2	108.31	16.13
Son Tra	Dong Bai Bac	DBB_O3_P2_G4.JPG	10/8/2019	2LC		108.311	16.1339
Son Tra	Mui Sung	MS_O1_P5_G5.JPG	14/8/2019	HB	3.1	108.305	16.0956
Son Tra	Dong Bai Bac	DBB_O3_P2_G5.JPG	10/8/2019	2LC	3.7	108.311	16.1339
Son Tra	Dong Bai Bac	DBB_DR_63_G5.JPG	10/8/2019	1LC	5.2	108.314	16.1431
Son Tra	Dong Bai Bac	DBB_O2_P2_G5.JPG	10/8/2019	1LC	5.2	108.311	16.1336
Son Tra	Mui Sung	MS_O1_P3_G2.JPG	14/8/2019	HB		108.305	16.0956
Son Tra	Mui Sung	MS_O1_P3_G1.JPG	14/8/2019	HB		108.305	16.0956
Son Tra	Vung Da Ban	VCB4_02_P1_G5.JPG	7/8/2019	1LC	5.2	108.27	16.1386
Son Tra	Dong Bai Bac	DBB_O3_P3_G1.JPG	10/8/2019	2LC		108.311	16.1341
Son Tra	Dong Bai Bac	DBB_O3_P3_G2.JPG	10/8/2019	2LC		108.311	16.1341
Son Tra	Bai Nom	BN_DR_03_G3.JPG	14/8/2019	S		108.301	16.0987
Son Tra	Vung Da Ban	VCB4_DR_21_G1.JPG	7/8/2019	1LC	5.2	108.27	16.1376
Son Tra	Mui Sung	MS_O1_P2_G5.JPG	14/8/2019	HB		108.305	16.0956
Son Tra	Vung Da	HL5_DR_04_G5.JPG	12/8/2019	1LC	5.3	108.317	16.1129
Son Tra	Dong Bai Bac	DBB_O3_P4_G5.JPG	10/8/2019	1LC	5.4	108.311	16.1341
Son Tra	Huc Lo	HL7_DR_11_G5.JPG	13/8/2019	1LC	5.4	108.31	16.1049
Son Tra	Mui Sung	MS_O1_P2_G3.JPG	14/8/2019	HB		108.305	16.0956
Son Tra	Mui Sung	MS_O1_P2_G2.JPG	14/8/2019	HB		108.305	16.0956
Son Tra	Tay Bai Bac	TBB_O1_P5_G5.JPG	8/8/2019	1LC	5.4	108.299	16.1272
Son Tra	Mui Sung	MS_O1_P2_G1.JPG	14/8/2019	HB		108.305	16.0956
Son Tra	Bai Nom	BN_DR_04_G51.JPG	14/8/2019	S		108.301	16.0986
Son Tra	Dong Bai Bac	DBB_O3_P3_G3.JPG	10/8/2019	2LC		108.311	16.1341
Son Tra	Mui Sung	MS_DR_O8_G2.JPG	14/8/2019	HB		108.307	16.0957
Son Tra	Dong Bai Bac	DBB_O3_P3_G4.JPG	10/8/2019	2LC		108.311	16.1341
Son Tra	Huc Lo	HL7_DR_05_G5.JPG	13/8/2019	1LC	5.7	108.31	16.1043
Son Tra	Vung Da Ban	VCB4_DR_01_G5.JPG	7/8/2019	1LC	5.7	108.27	16.1391
Son Tra	Vung Da Ban	VCB_DR_06_G2.JPG	7/8/2019	1LC	6	108.276	16.1346
Son Tra	Dong Bai Bac	DBB_O4_P4_G5.JPG	10/8/2019	1LC	6.1	108.312	16.1348
Son Tra	Mui Sung	MS_DR_O6_G2.JPG	14/8/2019	HB		108.306	16.0955
Son Tra	Hon Sup	THS_07_P4	17/8/2019	1LC	6.3	108.262	16.0901
Son Tra	Dong Bai Bac	DBB_DR_14_G5.JPG	10/8/2019	1LC	6.5	108.311	16.1339
Son Tra	Tay Bai Bac	TBB_O2_P4_G3.JPG	8/8/2019	1LC	6.5	108.3	16.1263
Son Tra	Dong Bai Bac	DBB_DR_17_G1.JPG	10/8/2019	1LC	6.6	108.312	16.1345
Son Tra	Dong Bai Bac	DBB_DR_17_G5.JPG	10/8/2019	1LC	6.6	108.311	16.1345
Son Tra	Dong Bai Bac	DBB_O3_P3_G5.JPG	10/8/2019	2LC		108.311	16.1341
Son Tra	Mui Sung	MS_DR_O1_G4.JPG	14/8/2019	HB		108.305	16.0955
Son Tra	Dong Bai Bac	DBB_DR_16_G5.JPG	10/8/2019	1LC	6.8	108.311	16.1344
Son Tra	Hon Sup	THS_07_P3	17/8/2019	1LC	6.8	108.262	16.09
Son Tra	Vung Da	MN_O8_P4_G5.JPG	12/8/2019	HB	2.7	108.325	16.1156
Son Tra	Dong Bai Bac	DBB_O4_P1_G1.JPG	10/8/2019	2LC		108.312	16.1347
Son Tra	Dong Bai Bac	DBB_O4_P1_G2.JPG	10/8/2019	2LC		108.312	16.1347
Son Tra	Huc Lo	HL7_DR_01_G5.JPG	13/8/2019	1LC	6.9	108.31	16.1042
Son Tra	Tay Bai Bac	TBB_DR_19_G1.JPG	8/8/2019	1LC	7	108.302	16.1253
Son Tra	Hon Sup	THS_DR_40	17/8/2019	1LC	7.4	108.261	16.0887
Son Tra	Tay Bai Bac	TBB_O1_P3_G5.JPG	8/8/2019	1LC	7.5	108.299	16.1272
Son Tra	Tay Bai Bac	TBB_DR_05_G2.JPG	8/8/2019	1LC	7.8	108.3	16.1262
Son Tra	Hon Sup	THS_DR_41	17/8/2019	1LC	8.5	108.261	16.0886
Son Tra	Bai But	BBU_DR_11_G4.JPG	15/8/2019	1LC		108.279	16.0974
Son Tra	Bai But	BBU_DR_12_G2.JPG	15/8/2019	1LC		108.279	16.0971
Son Tra	Bai But	BBU_DR_16_G4.JPG	15/8/2019	1LC		108.279	16.0972
Son Tra	Vung Da	MN_O8_P2_G5.JPG	12/8/2019	HB		108.325	16.1157
Son Tra	Mui Nghe	MN_O2_P5_G4.JPG	11/8/2019	HB		108.334	16.1182
Son Tra	Bai But	BBU_O1_P1_G2.JPG	15/8/2019	1LC		108.278	16.0973
Son Tra	Bai But	BBU1_02_P5_G2.JPG	15/8/2019	1LC		108.276	16.097
Son Tra	Bai Nom	BN_DR_04_G52.JPG	14/8/2019	S		108.301	16.0986
Son Tra	Bai But	BBU1_06_P1_G3.JPG	15/8/2019	1LC		108.274	16.0968
Son Tra	Bai But	BBU1_06_P2_G2.JPG	15/8/2019	1LC		108.274	16.0968
Son Tra	Bai Nom	BN_DR_04_G55.JPG	14/8/2019	S		108.301	16.0985
Son Tra	Bai But	BBU1_06_P2_G5.JPG	15/8/2019	1LC		108.274	16.0968
Son Tra	Bai Nom	BN_DR_04_G58.JPG	14/8/2019	S		108.301	16.0986
Son Tra	Bai Nom	BN_DR_05_G5.JPG	14/8/2019	S		108.301	16.0985
Son Tra	Dong Bai Bac	DBB_O4_P1_G3.JPG	10/8/2019	2LC		108.312	16.1347
Son Tra	Bai Nom	BN_DR_14_G32.JPG	14/8/2019	S		108.301	16.0983
Son Tra	Bai Nom	BN_DR_24_G5.JPG	14/8/2019	S		108.3	16.1026
Son Tra	Bai Nom	BN_DR_65_G24.JPG	14/8/2019	S		108.299	16.101
Son Tra	Bai Nom	BN_DR_65_G241.JPG	14/8/2019	S		108.3	16.1011
Son Tra	Bai Nom	BN_DR_65_G4.JPG	14/8/2019	S		108.299	16.1009
Son Tra	Bai Nom	BN_DR_65_G41.JPG	14/8/2019	S		108.299	16.101
Son Tra	Bai Nom	BN_DR_83_G5.JPG	14/8/2019	S		108.3	16.1002
Son Tra	Bai Nom	BN_DR_87_G5.JPG	14/8/2019	S		108.3	16.0998
Son Tra	Dong Bai Bac	DBB_O4_P1_G4.JPG	10/8/2019	2LC		108.312	16.1347
Son Tra	Dong Bai Bac	DBB_O4_P1_G5.JPG	10/8/2019	2LC	3	108.312	16.1347
Son Tra	Hon Sup	DHS_01_P1_G5.JPG	17/8/2019	2LC	5.2	108.262	16.0881
Son Tra	Hon Sup	DHS_01_P4_G5.JPG	17/8/2019	2LC	5.6	108.262	16.088
Son Tra	Bai Nom	BN_O3_P2_G5.JPG	14/8/2019	S		108.302	16.0978
Son Tra	Vung Da	MN_DR_35_G3.JPG	12/8/2019	HB		108.325	16.1155
Son Tra	Bai Nom	BN_O3_P2_G51.JPG	14/8/2019	S		108.302	16.0977
Son Tra			16/8/2019	D		108.265	16.09
Son Tra	Bai But	BBU1_06_P3_G2.JPG	15/8/2019	1LC		108.274	16.0968
Son Tra	Bai But	BBU1_06_P3_G4.JPG	15/8/2019	1LC		108.274	16.0968
Son Tra	Bai Nom	BN_O3_P2_G52.JPG	14/8/2019	S		108.302	16.0976
Son Tra	Bai But	BBU1_06_P3_G5.JPG	15/8/2019	1LC		108.274	16.0968
Son Tra	Bai But	BBU1_06_P5_G2.JPG	15/8/2019	1LC		108.274	16.0968
Son Tra			16/8/2019	D		108.265	16.09
Son Tra	Bai Nom	BN_O3_P4_G512.JPG	14/8/2019	S		108.302	16.0971
Son Tra	Bai Nom	BN_O3_P4_G513.JPG	14/8/2019	S		108.299	16.1024
Son Tra	Bai Nom	BN_O3_P4_G514.JPG	14/8/2019	S		108.303	16.097
Son Tra	Bai But	BBU1_06_P5_G4.JPG	15/8/2019	1LC		108.274	16.0968
Son Tra			16/8/2019	D		108.265	16.09
Son Tra	Bai But	BBU1_06_P5_G5.JPG	15/8/2019	1LC		108.274	16.0968
Son Tra	Bai Nom	BN_O3_P4_G516.JPG	14/8/2019	S		108.303	16.0969
Son Tra	Hon Sup	DHS_01_P5_G5.JPG	17/8/2019	2LC		108.262	16.0882
Son Tra	Bai But	BBU1_07_P5_G5.JPG	15/8/2019	1LC		108.274	16.0974
Son Tra	Bai But	BBU1_08_P1_G2.JPG	16/8/2019	1LC		108.273	16.0973
Son Tra	Hon Sup	DHS_02_P1_G5.JPG	17/8/2019	2LC	4.8	108.263	16.0883
Son Tra			16/8/2019	D		108.265	16.0901
Son Tra	Hon Sup	DHS_02_P1_G51.JPG	17/8/2019	2LC		108.263	16.0883
Son Tra	Hon Sup	DHS_02_P2_G5.JPG	17/8/2019	2LC	3.1	108.263	16.0883
Son Tra	Bai Nom	BN_O3_P4_G517.JPG	14/8/2019	S		108.303	16.0969
Son Tra			16/8/2019	D		108.265	16.0901
Son Tra	Bai But	BBU1_08_P1_G3.JPG	16/8/2019	1LC		108.272	16.0973
Son Tra	Bai But	BBU1_08_P4_G2.JPG	16/8/2019	1LC		108.273	16.0972
Son Tra	Bai But	BBU1_08_P4_G3.JPG	16/8/2019	1LC		108.272	16.0974
Son Tra	Bai But	BBU1_11_P2_G21.JPG	16/8/2019	1LC		108.272	16.0972
Son Tra	Bai But	BBU1_12_P3_G2.JPG	16/8/2019	1LC		108.272	16.0974
Son Tra	Vung Da	MN_DR_34_G5.JPG	12/8/2019	HB		108.325	16.1157
Son Tra	Hon Sup	DHS_02_P3_G5.JPG	17/8/2019	2LC	3.8	108.263	16.0883
Son Tra	Hon Sup	DHS_DR_02_G5.JPG	17/8/2019	2LC	5.2	108.262	16.0882
Son Tra	Vung Da	MN_DR_33_G5.JPG	12/8/2019	HB	2.1	108.325	16.1156
Son Tra	Vung Da	MN_DR_31_G2.JPG	12/8/2019	HB		108.326	16.1154
Son Tra	Hon Sup	DHS_DR_03_G4.JPG	17/8/2019	2LC		108.262	16.0881
Son Tra	Hon Sup	DHS_DR_03_G5.JPG	17/8/2019	2LC	5.4	108.262	16.0881
Son Tra	Bai But	BBU1_12_P4_G2.JPG	16/8/2019	1LC		108.272	16.0974
Son Tra	Hon Sup	DHS_DR_07_G7.JPG	17/8/2019	2LC		108.263	16.0883
Son Tra	Hon Sup	DHS_DR_09_G3.JPG	17/8/2019	2LC		108.262	16.0881
Son Tra	Bai But	BBU1_12_P4_G51.JPG	16/8/2019	1LC		108.272	16.0974
Son Tra	Mui Nghe	MN_DR_26	12/8/2019	HB	7.5	108.327	16.1152
Son Tra	Mui Nghe	MN_DR_20_G2.JPG	12/8/2019	HB		108.328	16.1155
Son Tra	Bai But	BBU1_12_P5_G2.JPG	16/8/2019	1LC		108.272	16.0974
Son Tra	Mui Nghe	MN_DR_07_G5.JPG	11/8/2019	HB		108.334	16.1184
Son Tra	Bai But	BBU1_12_P5_G4.JPG	16/8/2019	1LC		108.272	16.0974
Son Tra	Bai But	BBU1_12_P5_G5.JPG	16/8/2019	1LC		108.272	16.0974
Son Tra	Huc Lo	HL_DR_03_G2.JPG	13/8/2019	2LC		108.314	16.1123
Son Tra	Huc Lo	HL_DR_03_G5.JPG	13/8/2019	2LC		108.314	16.1122
Son Tra	Vung Da	BBU_O2_P4_G5.JPG	12/8/2019	3LC		108.323	16.1159
Son Tra	Vung Da	BBU_O2_P5_G5.JPG	12/8/2019	3LC		108.323	16.116
Son Tra	Huc Lo	HL_DR_06_G2.JPG	13/8/2019	2LC		108.314	16.1122
Son Tra	Bai But	BBU1_13_P2	15/8/2019	1LC		108.273	16.0975
Son Tra	Bai But	BBU1_13_P3	15/8/2019	1LC		108.273	16.0975
Son Tra	Huc Lo	HL_DR_10_G2.JPG	13/8/2019	2LC		108.313	16.1122
Son Tra	Huc Lo	HL_DR_11_G5.JPG	13/8/2019	2LC	2.2	108.313	16.1122
Son Tra	Huc Lo	HL_DR_14_G5.JPG	13/8/2019	2LC		108.313	16.1123
Son Tra	Huc Lo	HL_DR_18_G1.JPG	13/8/2019	2LC		108.313	16.1122
Son Tra	Huc Lo	HL_DR_18_G5.JPG	13/8/2019	2LC	4.1	108.313	16.1122
Son Tra	Huc Lo	HL_DR_19_G4.JPG	13/8/2019	2LC		108.313	16.1124
Son Tra	Bai But	BBU1_13_P4	15/8/2019	1LC		108.273	16.0975
Son Tra	Bai Nom	BN_O3_P4_G518.JPG	14/8/2019	S		108.302	16.0971
Son Tra	Bai Nom	BN_O3_P4_G519.JPG	14/8/2019	S		108.3	16.0994
Son Tra	Bai Nom	BN_O3_P4_G520.JPG	14/8/2019	S		108.3	16.0994
Son Tra	Bai Nom	BN_O3_P4_G55.JPG	14/8/2019	S		108.303	16.0969
Son Tra	Bai But	BBU1_14_P3	15/8/2019	1LC		108.273	16.0979
Son Tra	Bai But	BBU1_14_P5	15/8/2019	1LC		108.273	16.0979
Son Tra	Huc Lo	HL_DR_22_G5.JPG	13/8/2019	2LC	2.3	108.312	16.1124
Son Tra	Huc Lo	HL_DR_28_G5.JPG	13/8/2019	2LC	5.2	108.312	16.1121
Son Tra	Huc Lo	HL_DR_32_G1.JPG	13/8/2019	2LC		108.312	16.1121
Son Tra	Huc Lo	HL_DR_32_G3.JPG	13/8/2019	2LC		108.312	16.1122
Son Tra	Huc Lo	HL_DR_32_G4.JPG	13/8/2019	2LC		108.312	16.1121
Son Tra	Huc Lo	HL7_DR_26_G5.JPG	13/8/2019	HB	6.1	108.31	16.1054
Son Tra	Huc Lo	HL7_DR_26_G3.JPG	13/8/2019	HB		108.31	16.1054
Son Tra	Huc Lo	HL7_DR_26_G2.JPG	13/8/2019	HB		108.31	16.1054
Son Tra	Huc Lo	HL7_DR_26_G1.JPG	13/8/2019	HB		108.31	16.1053
Son Tra	Huc Lo	HL7_DR_25_G5.JPG	13/8/2019	HB	4.3	108.31	16.1054
Son Tra	Huc Lo	HL_DR_32_G5.JPG	13/8/2019	2LC		108.312	16.1121
Son Tra	Bai But	BBU1_15_P1_G5.JPG	15/8/2019	1LC		108.273	16.0968
Son Tra	Huc Lo	HL_DR_32_G51.JPG	13/8/2019	2LC	3.4	108.312	16.1121
Son Tra	Bai But	BBU1_DR_17_G2.JPG	15/8/2019	1LC		108.275	16.0974
Son Tra	Bai But	BBU1_DR_24_G2.JPG	15/8/2019	1LC		108.274	16.0974
Son Tra	Huc Lo	HL_DR_33_G2.JPG	13/8/2019	2LC		108.312	16.112
Son Tra	Bai But	BBU1_DR_24_G3.JPG	15/8/2019	1LC		108.274	16.0974
Son Tra	Huc Lo	HL7_DR_23_G5.JPG	13/8/2019	HB	6.2	108.31	16.1057
Son Tra	Bai But	BBU1_DR_24_G4.JPG	15/8/2019	1LC		108.274	16.0973
Son Tra	Huc Lo	HL7_DR_23_G4.JPG	13/8/2019	HB		108.31	16.1056
Son Tra	Huc Lo	HL_DR_33_G4.JPG	13/8/2019	2LC		108.312	16.1121
Son Tra	Huc Lo	HL7_DR_23_G3.JPG	13/8/2019	HB		108.31	16.1057
Son Tra	Huc Lo	HL_DR_33_G5.JPG	13/8/2019	2LC	2.8	108.312	16.1121
Son Tra	Bai But	BBU1_DR_26_G5.JPG	15/8/2019	1LC		108.274	16.0971
Son Tra	Bai But	BBU1_DR_28_G3.JPG	15/8/2019	1LC		108.274	16.0972
Son Tra	Bai But	BBU1_DR_29_G3.JPG	15/8/2019	1LC		108.274	16.0971
Son Tra	Bai But	BBU1_DR_39_G2.JPG	16/8/2019	1LC		108.272	16.0976
Son Tra	Bai But	BBU1_DR_39_G3.JPG	16/8/2019	1LC		108.272	16.0976
Son Tra	Bai But	BBU1_DR_39_G50.JPG	16/8/2019	1LC		108.272	16.0976
Son Tra	Huc Lo	HL_DR_35_G2.JPG	13/8/2019	2LC		108.312	16.1119
Son Tra	Bai But	BBU1_DR_39_G52.JPG	16/8/2019	1LC		108.272	16.0976
Son Tra	Huc Lo	HL7_DR_23_G2.JPG	13/8/2019	HB		108.31	16.1057
Son Tra	Huc Lo	HL7_DR_23_G1.JPG	13/8/2019	HB		108.31	16.1056
Son Tra	Huc Lo	HL_DR_38_G1.JPG	13/8/2019	2LC	8.2	108.312	16.1116
Son Tra	Huc Lo	HL_DR_47_G5.JPG	13/8/2019	2LC		108.311	16.1115
Son Tra	Bai But	BBU1_DR_40_G2.JPG	16/8/2019	1LC		108.272	16.0974
Son Tra	Huc Lo	HL_DR_50	13/8/2019	2LC	5.5	108.311	16.1109
Son Tra	Bai But	BBU1_DR_43_G1.JPG	16/8/2019	1LC		108.272	16.0972
Son Tra	Huc Lo	HL7_DR_22_G1.JPG	13/8/2019	HB		108.31	16.1059
Son Tra	Bai Nom	BN_DR_02_G1.JPG	14/8/2019	1LC		108.3	16.0988
Son Tra	Bai Nom	BN_DR_02_G2.JPG	14/8/2019	1LC		108.3	16.0988
Son Tra	Huc Lo	HL_DR_52_G2.JPG	13/8/2019	2LC		108.311	16.1106
Son Tra	Bai Nom	BN_DR_02_G4.JPG	14/8/2019	1LC		108.3	16.0988
Son Tra	Bai Nom	BN_DR_03_G1.JPG	14/8/2019	1LC		108.301	16.0987
Son Tra	Bai Nom	BN_DR_03_G2.JPG	14/8/2019	1LC		108.301	16.0987
Son Tra	Bai Nom	BN_DR_03_G4.JPG	14/8/2019	1LC		108.301	16.0987
Son Tra	Bai Nom	BN_DR_03_G5.JPG	14/8/2019	1LC		108.301	16.0987
Son Tra	Bai Nom	BN_DR_07_G4.JPG	14/8/2019	1LC		108.301	16.0986
Son Tra	Huc Lo	HL7_DR_21_G2.JPG	13/8/2019	HB		108.31	16.1059
Son Tra	Bai Nom	BN_O3_P4_G56.JPG	14/8/2019	S		108.302	16.0972
Son Tra	Huc Lo	HL7_DR_13_G3.JPG	13/8/2019	HB		108.31	16.1052
Son Tra	Bai Nom	BN_DR_08_G1.JPG	14/8/2019	1LC		108.301	16.0987
Son Tra	Huc Lo	HL7_DR_12_G5.JPG	13/8/2019	HB	6.3	108.31	16.1049
Son Tra	Huc Lo	HL_DR_27_G5.JPG	13/8/2019	3LC		108.312	16.112
Son Tra	Bai Nom	BN_DR_08_G5.JPG	14/8/2019	1LC		108.301	16.0987
Son Tra	Bai Nom	BN_DR_10_G5.JPG	14/8/2019	1LC		108.301	16.0985
Son Tra	Huc Lo	HL_DR_53_G1.JPG	13/8/2019	2LC	5.8	108.311	16.1104
Son Tra	Bai Nom	BN_DR_11_G2.JPG	14/8/2019	1LC		108.301	16.0984
Son Tra	Bai Nom	BN_DR_12_G5.JPG	14/8/2019	1LC		108.301	16.0982
Son Tra	Bai Nom	BN_DR_16_G5.JPG	14/8/2019	1LC		108.301	16.0982
Son Tra	Huc Lo	HL_DR_54_G2.JPG	13/8/2019	2LC		108.311	16.1104
Son Tra	Huc Lo	HL_O1_P1_G5.JPG	13/8/2019	2LC	4.5	108.314	16.1121
Son Tra	Bai Nom	BN_DR_30_G3.JPG	14/8/2019	1LC		108.299	16.1021
Son Tra			14/8/2019	D		108.307	16.0928
Son Tra	Huc Lo	HL_O1_P4_G2.JPG	13/8/2019	2LC		108.314	16.1121
Son Tra	Huc Lo	HL_O1_P4_G5.JPG	13/8/2019	2LC	3.8	108.314	16.112
Son Tra	Huc Lo	HL_O1_P5_G5.JPG	13/8/2019	2LC	3.6	108.314	16.1121
Son Tra	Huc Lo	HL7_DR_07_G5.JPG	13/8/2019	HB	6.3	108.31	16.1046
Son Tra	Bai Nom	BN_DR_31_G2.JPG	14/8/2019	1LC		108.299	16.102
Son Tra	Huc Lo	HL_O2_P1_G2.JPG	13/8/2019	2LC		108.314	16.1122
Son Tra	Bai Nom	BN_O3_P4_G57.JPG	14/8/2019	S		108.302	16.0972
Son Tra	Huc Lo	HL_O2_P2_G5.JPG	13/8/2019	2LC	2.1	108.314	16.1123
Son Tra	Huc Lo	HL_O2_P4_G4.JPG	13/8/2019	2LC		108.314	16.1122
Son Tra	Bai Nom	BN_DR_32_G1.JPG	14/8/2019	1LC		108.299	16.1019
Son Tra	Bai Nom	BN_DR_45_G5.JPG	14/8/2019	1LC		108.3	16.1018
Son Tra	Huc Lo	HL_O3_P1_G5.JPG	13/8/2019	2LC		108.313	16.1126
Son Tra	Bai Nom	BN_O3_P4_G58.JPG	14/8/2019	S		108.302	16.0973
Son Tra	Bai Nom	BN_O3_P4_G59.JPG	14/8/2019	S		108.303	16.0969
Son Tra	Bai Nom	BN_O4_P3_G523.JPG	14/8/2019	S		108.3	16.1027
Son Tra	Huc Lo	HL7_DR_06_G3.JPG	13/8/2019	HB		108.31	16.1044
Son Tra	Huc Lo	HL7_DR_06_G2.JPG	13/8/2019	HB		108.31	16.1044
Son Tra	Huc Lo	HL7_DR_03_G1.JPG	13/8/2019	HB		108.31	16.104
Son Tra	Huc Lo	HL_O3_P3_G5.JPG	13/8/2019	2LC	1.6	108.313	16.1125
Son Tra	Huc Lo	HL7_DR_01_G4.JPG	13/8/2019	HB		108.31	16.1042
Son Tra	Bai Nom	BN_DR_65_G44.JPG	14/8/2019	1LC		108.299	16.101
Son Tra	Bai Nom	BN_O5_P2_G51.JPG	14/8/2019	S		108.299	16.1022
Son Tra	Bai Nom	BN_O5_P2_G53.JPG	14/8/2019	S		108.299	16.1022
Son Tra	Bai Nom	BN_O5_P2_G54.JPG	14/8/2019	S		108.299	16.1021
Son Tra	Bai Nom	BN_O5_P2_G55.JPG	14/8/2019	S		108.299	16.1022
Son Tra	Bai Nom	BN_DR_65_G5.JPG	14/8/2019	1LC		108.3	16.101
Son Tra	Bai Nom	BN_O5_P2_G56.JPG	14/8/2019	S		108.3	16.1022
Son Tra	Bai Nom	BN_O5_P5_G5.JPG	14/8/2019	S		108.299	16.1021
Son Tra	Bai Nom	BN_O7_P1_G2.JPG	14/8/2019	S		108.299	16.1013
Son Tra	Dong Bai Bac	DBB_O2_P5_G41.JPG	10/8/2019	S		108.311	16.1335
Son Tra	Dong Bai Bac	DBB_O2_P5_G44.JPG	10/8/2019	S		108.311	16.1335
Son Tra	Bai Nom	BN_DR_75_G2.JPG	14/8/2019	1LC		108.299	16.1009
Son Tra	Bai Nom	BN_DR_78_G5.JPG	14/8/2019	1LC		108.3	16.1008
Son Tra	Huc Lo	HL7_03_P3_G1.JPG	13/8/2019	HB		108.31	16.1055
Son Tra	Bai Nom	BN_DR_84_G1.JPG	14/8/2019	1LC		108.3	16.1001
Son Tra	Dong Bai Bac	DBB_O1_P4_G5.JPG	10/8/2019	S		108.311	16.1333
Son Tra	Huc Lo	HL_O3_P4_G5.JPG	13/8/2019	2LC	2	108.313	16.1125
Son Tra	Huc Lo	HL7_03_P2_G2.JPG	13/8/2019	HB		108.309	16.1056
Son Tra	Huc Lo	HL7_03_P1_G5.JPG	13/8/2019	HB	4.3	108.309	16.1055
Son Tra	Huc Lo	HL_O3_P5_G5.JPG	13/8/2019	2LC	2.2	108.313	16.1126
Son Tra	Dong Bai Bac	DBB_O1_P4_G4.JPG	10/8/2019	S		108.311	16.1333
Son Tra	Dong Bai Bac	DBB_O1_P4_G3.JPG	10/8/2019	S		108.311	16.1333
Son Tra	Huc Lo	HL7_02_P5_G1.JPG	13/8/2019	HB		108.309	16.1053
Son Tra	Dong Bai Bac	DBB_O1_P4_G2.JPG	10/8/2019	S		108.311	16.1333
Son Tra	Huc Lo	HL_O4_P3_G2.JPG	13/8/2019	2LC		108.313	16.1121
Son Tra	Huc Lo	HL_O4_P3_G4.JPG	13/8/2019	2LC		108.312	16.1121
Son Tra	Huc Lo	HL_O4_P3_G5.JPG	13/8/2019	2LC	5.2	108.313	16.1121
Son Tra	Huc Lo	HL_DR_40_G21.JPG	13/8/2019	S		108.312	16.1119
Son Tra	Bai Nom	BN_DR_92_G5.JPG	14/8/2019	1LC		108.3	16.0999
Son Tra	Vung Da	HL5_DR_11_G5.JPG	12/8/2019	HB	6.4	108.318	16.1132
Son Tra	Huc Lo	HL_O5_P1_G2.JPG	13/8/2019	2LC		108.312	16.112
Son Tra	Bai Nom	BN_DR_94_G6.JPG	14/8/2019	1LC		108.3	16.0997
Son Tra	Vung Da	HL5_DR_10_G54.JPG	12/8/2019	HB	5.4	108.317	16.1132
Son Tra	Bai Nom	BN_DR_95_G5.JPG	14/8/2019	1LC		108.3	16.0998
Son Tra	Bai Nom	BN_DR_97_G5.JPG	14/8/2019	1LC		108.3	16.0995
Son Tra	Bai Nom	BN_O1_P1_G1.JPG	14/8/2019	1LC		108.301	16.0988
Son Tra	Bai Nom	BN_O1_P1_G3.JPG	14/8/2019	1LC		108.3	16.0988
Son Tra	Huc Lo	HL_O5_P2_G1.JPG	13/8/2019	2LC		108.312	16.112
Son Tra	Huc Lo	HL_O5_P2_G3.JPG	13/8/2019	2LC		108.312	16.1121
Son Tra	Vung Da	HL5_DR_10_G51.JPG	12/8/2019	HB		108.317	16.1133
Son Tra	Vung Da	HL5_DR_07_G5.JPG	12/8/2019	HB	5.2	108.317	16.1131
Son Tra	Bai Nom	BN_O1_P3_G2.JPG	14/8/2019	1LC		108.301	16.0987
Son Tra	Huc Lo	HL_O5_P2_G5.JPG	13/8/2019	2LC	3.6	108.312	16.1121
Son Tra	Bai Nom	BN_O1_P4_G2.JPG	14/8/2019	1LC		108.301	16.0987
Son Tra	Huc Lo	HL_O5_P3_G3.JPG	13/8/2019	2LC		108.312	16.112
Son Tra	Bai Nom	BN_O1_P4_G4.JPG	14/8/2019	1LC		108.301	16.0987
Son Tra	Bai Nom	BN_O2_P1_G5.JPG	14/8/2019	1LC		108.301	16.0986
Son Tra	Huc Lo	HL_O5_P3_G4.JPG	13/8/2019	2LC		108.312	16.112
Son Tra	Vung Da	HL5_DR_01_G5.JPG	12/8/2019	HB	4.8	108.316	16.1124
Son Tra	Bai Nom	BN_O2_P5_G5.JPG	14/8/2019	1LC		108.301	16.0986
Son Tra	Bai Nom	BN_O5_P4_G4.JPG	14/8/2019	1LC		108.3	16.102
Son Tra	Huc Lo	HL_O5_P3_G5.JPG	13/8/2019	2LC	4.3	108.312	16.112
Son Tra	Bai Nom	BN_O7_P2_G4.JPG	14/8/2019	1LC		108.299	16.1012
Son Tra	Bai Nom	BN_O7_P5_G2.JPG	14/8/2019	1LC		108.299	16.1013
Son Tra	Bai Nom	BN_O9_P3_G5.JPG	14/8/2019	1LC		108.3	16.1004
Son Tra	Bai Nom	BN_O9_P5_G2.JPG	14/8/2019	1LC		108.3	16.1004
Son Tra	Huc Lo	HL_DR_40_G22.JPG	13/8/2019	S		108.312	16.1119
Son Tra	Vung Da	HL5_03_P5_G5.JPG	12/8/2019	HB	2.8	108.317	16.1134
Son Tra	Huc Lo	HL_O6_P1_G1.JPG	13/8/2019	2LC		108.312	16.1115
Son Tra	Huc Lo	HL_DR_40_G23.JPG	13/8/2019	S		108.312	16.1118
Son Tra	Bai Nom	BN_O9_P5_G5.JPG	14/8/2019	1LC		108.3	16.1004
Son Tra	Huc Lo	HL7_01_P1_G3.JPG	13/8/2019	2LC		108.31	16.1046
Son Tra	Huc Lo	HL_DR_40_G24.JPG	13/8/2019	S		108.312	16.1118
Son Tra	Vung Da	BU_01_P1_G1.JPG	12/8/2019	1LC		108.323	16.116
Son Tra	Vung Da	BU_01_P3_G3.JPG	12/8/2019	1LC		108.323	16.116
Son Tra	Huc Lo	HL_DR_40_G25.JPG	13/8/2019	S		108.312	16.1119
Son Tra	Huc Lo	HL_DR_41_G2.JPG	13/8/2019	S		108.312	16.112
Son Tra	Huc Lo	HL_DR_43_G1.JPG	13/8/2019	S		108.312	16.1117
Son Tra	Huc Lo	HL7_01_P2_G5.JPG	13/8/2019	2LC	3	108.31	16.1046
Son Tra	Huc Lo	HL7_01_P4_G1.JPG	13/8/2019	2LC		108.31	16.1047
Son Tra	Huc Lo	HL_DR_43_G2.JPG	13/8/2019	S		108.312	16.1117
Son Tra	Vung Da	BU_DR_03_G3.JPG	12/8/2019	1LC		108.323	16.1159
Son Tra	Dong Bai Bac	DBB_05_P2_G4.JPG	10/8/2019	1LC		108.312	16.1371
Son Tra	Huc Lo	HL_DR_43_G3.JPG	13/8/2019	S		108.312	16.1117
Son Tra	Huc Lo	HL7_01_P4_G5.JPG	13/8/2019	2LC	5.4	108.31	16.1047
Son Tra	Huc Lo	HL_DR_43_G4.JPG	13/8/2019	S		108.312	16.1117
Son Tra	Vung Da	HL5_01_P4_G5.JPG	12/8/2019	HB	6	108.317	16.1127
Son Tra	Huc Lo	HL7_01_P5_G5.JPG	13/8/2019	2LC	3.8	108.31	16.1046
Son Tra	Huc Lo	HL_DR_43_G5.JPG	13/8/2019	S		108.312	16.1117
Son Tra	Huc Lo	HL7_02_P2_G2.JPG	13/8/2019	2LC		108.309	16.1053
Son Tra	Huc Lo	HL7_02_P2_G4.JPG	13/8/2019	2LC		108.309	16.1053
Son Tra	Dong Bai Bac	DBB_05_P3_G3.JPG	10/8/2019	1LC		108.312	16.1372
Son Tra	Vung Da	HL5_01_P3_G5.JPG	12/8/2019	HB	5.9	108.317	16.1128
Son Tra	Huc Lo	HL_O6_P2_G2.JPG	13/8/2019	HB		108.312	16.1115
Son Tra	Huc Lo	HL_O5_P5_G5.JPG	13/8/2019	HB		108.312	16.112
Son Tra	Huc Lo	HL7_02_P3_G5.JPG	13/8/2019	2LC	3.5	108.309	16.1053
Son Tra	Dong Bai Bac	DBB_O1_P4_G1.JPG	10/8/2019	S		108.311	16.1333
Son Tra	Dong Bai Bac	DBB_05_P5_G5.JPG	10/8/2019	1LC		108.312	16.1371
Son Tra	Dong Bai Bac	DBB_06_P1_G2.JPG	10/8/2019	1LC		108.312	16.1374
Son Tra	Dong Bai Bac	DBB_06_P2_G5.JPG	10/8/2019	1LC		108.312	16.1376
Son Tra	Huc Lo	HL7_03_P2_G1.JPG	13/8/2019	2LC		108.309	16.1055
Son Tra	Huc Lo	HL7_03_P3_G3.JPG	13/8/2019	2LC		108.31	16.1055
Son Tra	Dong Bai Bac	DBB_O1_P3_G4.JPG	10/8/2019	S		108.311	16.1332
Son Tra	Dong Bai Bac	DBB_O1_P3_G3.JPG	10/8/2019	S		108.311	16.1333
Son Tra	Huc Lo	HL7_03_P4_G5.JPG	13/8/2019	2LC	5.3	108.31	16.1054
Son Tra	Huc Lo	HL_O5_P5_G2.JPG	13/8/2019	HB		108.312	16.112
Son Tra	Huc Lo	HL_O5_P5_G1.JPG	13/8/2019	HB		108.312	16.112
Son Tra	Huc Lo	HL7_04_P1_G4.JPG	13/8/2019	2LC		108.309	16.1058
Son Tra	Huc Lo	HL7_04_P1_G5.JPG	13/8/2019	2LC	1.9	108.309	16.1058
Son Tra	Huc Lo	HL7_04_P2_G3.JPG	13/8/2019	2LC		108.309	16.1058
Son Tra	Dong Bai Bac	DBB_06_P4_G3.JPG	10/8/2019	1LC		108.312	16.1376
Son Tra	Dong Bai Bac	DBB_06_P4_G4.JPG	10/8/2019	1LC		108.312	16.1376
Son Tra	Dong Bai Bac	DBB_07_P3_G2.JPG	10/8/2019	1LC		108.312	16.1378
Son Tra	Dong Bai Bac	DBB_08_P1_G4.JPG	10/8/2019	1LC		108.312	16.1383
Son Tra	Dong Bai Bac	DBB_08_P2_G1.JPG	10/8/2019	1LC		108.312	16.1383
Son Tra	Dong Bai Bac	DBB_O1_P3_G2.JPG	10/8/2019	S		108.311	16.1333
Son Tra	Huc Lo	HL_O5_P3_G2.JPG	13/8/2019	HB		108.312	16.112
Son Tra	Huc Lo	HL_O5_P3_G1.JPG	13/8/2019	HB		108.312	16.112
Son Tra	Dong Bai Bac	DBB_08_P5_G3.JPG	10/8/2019	1LC		108.312	16.1383
Son Tra	Dong Bai Bac	DBB_11_P3_G4.JPG	10/8/2019	1LC		108.314	16.1429
Son Tra	Huc Lo	HL_O4_P5_G5.JPG	13/8/2019	HB	5.3	108.313	16.112
Son Tra	Huc Lo	HL7_04_P4_G3.JPG	13/8/2019	2LC		108.31	16.1058
Son Tra	Huc Lo	HL_O4_P5_G4.JPG	13/8/2019	HB		108.312	16.1121
Son Tra	Huc Lo	HL7_04_P5_G3.JPG	13/8/2019	2LC		108.309	16.1058
Son Tra	Dong Bai Bac	DBB_DR_03_G5.JPG	9/8/2019	1LC		108.31	16.1295
Son Tra	Dong Bai Bac	DBB_DR_04_G1.JPG	9/8/2019	1LC		108.309	16.1294
Son Tra	Dong Bai Bac	DBB_DR_04_G2.JPG	9/8/2019	1LC		108.309	16.1294
Son Tra	Huc Lo	HL7_04_P5_G5.JPG	13/8/2019	2LC	2.2	108.309	16.1058
Son Tra	Huc Lo	HL7_DR_01_G2.JPG	13/8/2019	2LC		108.31	16.1042
Son Tra	Dong Bai Bac	DBB_DR_04_G3.JPG	9/8/2019	1LC		108.309	16.1294
Son Tra	Dong Bai Bac	DBB_DR_04_G4.JPG	9/8/2019	1LC		108.309	16.1294
Son Tra	Dong Bai Bac	DBB_DR_06_G2.JPG	9/8/2019	1LC		108.31	16.1317
Son Tra	Huc Lo	HL7_DR_03_G3.JPG	13/8/2019	2LC		108.31	16.1041
Son Tra	Dong Bai Bac	DBB_O1_P3_G1.JPG	10/8/2019	S		108.311	16.1332
Son Tra	Huc Lo	HL7_DR_07_G1.JPG	13/8/2019	2LC		108.31	16.1046
Son Tra	Huc Lo	HL7_DR_07_G2.JPG	13/8/2019	2LC		108.31	16.1046
Son Tra	Huc Lo	HL7_DR_07_G3.JPG	13/8/2019	2LC		108.31	16.1046
Son Tra	Mui Nghe	Camera 360	11/8/2019	S		108.332	16.1183
Son Tra	Dong Bai Bac	DBB_DR_09_G1.JPG	9/8/2019	1LC		108.31	16.1325
Son Tra	Huc Lo	HL7_DR_12_G1.JPG	13/8/2019	2LC		108.31	16.1049
Son Tra	Huc Lo	HL_O4_P4_G5.JPG	13/8/2019	HB	5.6	108.313	16.1121
Son Tra	Dong Bai Bac	DBB_DR_09_G2.JPG	9/8/2019	1LC		108.31	16.1326
Son Tra	Dong Bai Bac	DBB_DR_09_G3.JPG	9/8/2019	1LC		108.31	16.1326
Son Tra	Dong Bai Bac	DBB_DR_09_G4.JPG	9/8/2019	1LC		108.31	16.1325
Son Tra	Huc Lo	HL_O4_P1_G5.JPG	13/8/2019	HB	6.2	108.313	16.112
Son Tra	Huc Lo	HL7_DR_13_G1.JPG	13/8/2019	2LC		108.309	16.1052
Son Tra	Mui Nghe	Camera 360	12/8/2019	S		108.328	16.116
Son Tra	Huc Lo	HL_O2_P5_G5.JPG	13/8/2019	HB	2.2	108.314	16.1122
Son Tra	Mui Nghe	Camera 360	12/8/2019	S		108.328	16.116
Son Tra	Mui Nghe	Camera 360	12/8/2019	S		108.327	16.1155
Son Tra	Dong Bai Bac	DBB_DR_09_G5.JPG	9/8/2019	1LC		108.31	16.1325
Son Tra	Dong Bai Bac	DBB_DR_10_G2.JPG	10/8/2019	1LC		108.311	16.1331
Son Tra	Dong Bai Bac	DBB_DR_10_G3.JPG	10/8/2019	1LC		108.311	16.1331
Son Tra	Huc Lo	HL_O1_P2_G5.JPG	13/8/2019	HB	3	108.314	16.1121
Son Tra	Huc Lo	HL7_DR_14_G1.JPG	13/8/2019	2LC		108.309	16.1051
Son Tra	Mui Nghe	Camera 360	12/8/2019	S		108.328	16.1159
Son Tra	Dong Bai Bac	DBB_DR_10_G4.JPG	10/8/2019	1LC		108.311	16.1331
Son Tra	Dong Bai Bac	DBB_DR_12_G1.JPG	10/8/2019	1LC		108.311	16.1333
Son Tra	Dong Bai Bac	DBB_DR_12_G2.JPG	10/8/2019	1LC		108.311	16.1333
Son Tra	Dong Bai Bac	DBB_DR_12_G3.JPG	10/8/2019	1LC		108.311	16.1333
Son Tra	Huc Lo	HL7_DR_14_G5.JPG	13/8/2019	2LC	5	108.309	16.1051
Son Tra	Dong Bai Bac	DBB_DR_12_G4.JPG	10/8/2019	1LC		108.311	16.1333
Son Tra	Dong Bai Bac	DBB_DR_14_G1.JPG	10/8/2019	1LC		108.311	16.1339
Son Tra	Dong Bai Bac	DBB_DR_14_G2.JPG	10/8/2019	1LC		108.311	16.1339
Son Tra	Dong Bai Bac	DBB_DR_14_G3.JPG	10/8/2019	1LC		108.311	16.1339
Son Tra	Huc Lo	HL7_DR_15_G5.JPG	13/8/2019	2LC	3.4	108.309	16.1052
Son Tra	Huc Lo	HL7_DR_16_G5.JPG	13/8/2019	2LC	1.7	108.309	16.1051
Son Tra	Huc Lo	HL7_DR_19_G4.JPG	13/8/2019	2LC		108.309	16.1057
Son Tra	Huc Lo	HL7_DR_19_G5.JPG	13/8/2019	2LC	3.2	108.309	16.1057
Son Tra	Dong Bai Bac	DBB_DR_14_G4.JPG	10/8/2019	1LC		108.311	16.1339
Son Tra	Huc Lo	HL7_DR_20_G5.JPG	13/8/2019	2LC	2.7	108.31	16.1059
Son Tra	Huc Lo	HL7_DR_21_G1.JPG	13/8/2019	2LC		108.31	16.1059
Son Tra	Huc Lo	HL7_DR_21_G4.JPG	13/8/2019	2LC		108.31	16.1059
Son Tra	Dong Bai Bac	DBB_DR_16_G1.JPG	10/8/2019	1LC		108.311	16.1343
Son Tra	Huc Lo	HL_DR_9	13/8/2019	HB	6.8	108.313	16.1121
Son Tra	Dong Bai Bac	DBB_DR_16_G2.JPG	10/8/2019	1LC		108.311	16.1344
Son Tra	Dong Bai Bac	DBB_DR_16_G3.JPG	10/8/2019	1LC		108.311	16.1344
Son Tra	Dong Bai Bac	DBB_DR_16_G4.JPG	10/8/2019	1LC		108.311	16.1343
Son Tra	Dong Bai Bac	DBB_DR_17_G2.JPG	10/8/2019	1LC		108.311	16.1345
Son Tra	Dong Bai Bac	DBB_DR_17_G3.JPG	10/8/2019	1LC		108.311	16.1345
Son Tra	Dong Bai Bac	DBB_DR_17_G4.JPG	10/8/2019	1LC		108.311	16.1345
Son Tra	Huc Lo	HL_DR_51	13/8/2019	HB	6.3	108.311	16.1108
Son Tra	Dong Bai Bac	DBB_DR_18_G1.JPG	10/8/2019	1LC		108.312	16.1345
Son Tra	Huc Lo	HL7_DR_24_G1.JPG	13/8/2019	2LC		108.31	16.1056
Son Tra	Dong Bai Bac	DBB_DR_18_G2.JPG	10/8/2019	1LC		108.312	16.1345
Son Tra	Dong Bai Bac	DBB_DR_18_G3.JPG	10/8/2019	1LC		108.311	16.1345
Son Tra	Dong Bai Bac	DBB_DR_18_G4.JPG	10/8/2019	1LC		108.311	16.1345
Son Tra	Dong Bai Bac	DBB_DR_20_G5.JPG	10/8/2019	1LC		108.312	16.1368
Son Tra	Dong Bai Bac	DBB_DR_21_G1.JPG	10/8/2019	1LC		108.312	16.1367
Son Tra	Vung Da	BU_01_P1_G5.JPG	12/8/2019	3LC	2.2	108.323	16.1159
Son Tra	Dong Bai Bac	DBB_DR_21_G2.JPG	10/8/2019	1LC		108.312	16.1368
Son Tra	Dong Bai Bac	DBB_DR_21_G3.JPG	10/8/2019	1LC		108.312	16.1368
Son Tra	Huc Lo	HL_DR_49	13/8/2019	HB	6.2	108.311	16.1111
Son Tra	Huc Lo	HL_DR_45_G5.JPG	13/8/2019	HB	4.4	108.311	16.1116
Son Tra	Huc Lo	HL7_DR_24_G3.JPG	13/8/2019	2LC		108.31	16.1056
Son Tra	Huc Lo	HL7_DR_24_G4.JPG	13/8/2019	2LC		108.31	16.1055
Son Tra	Huc Lo	HL7_DR_24_G5.JPG	13/8/2019	2LC		108.31	16.1056
Son Tra	Huc Lo	HL_DR_39_G2.JPG	13/8/2019	HB		108.312	16.1116
Son Tra	Huc Lo	HL_DR_36_G5.JPG	13/8/2019	HB	5.9	108.312	16.1119
Son Tra	Dong Bai Bac	DBB_DR_21_G4.JPG	10/8/2019	1LC		108.312	16.1367
Son Tra	Dong Bai Bac	DBB_DR_28_G2.JPG	10/8/2019	1LC		108.312	16.1374
Son Tra	Vung Da	BU_01_P3_G5.JPG	12/8/2019	3LC	4.6	108.323	16.1159
Son Tra	Vung Da	BU_01_P4_G2.JPG	12/8/2019	3LC		108.323	16.116
Son Tra	Mui Nghe	Camera 360	11/8/2019	S		108.332	16.1183
Son Tra	Dong Bai Bac	DBB_DR_29_G5.JPG	10/8/2019	1LC		108.312	16.1375
Son Tra	Vung Da	BU_01_P4_G5.JPG	12/8/2019	3LC	3	108.323	16.116
Son Tra	Mui Nghe	MN_DR_05_G4.JPG	11/8/2019	2LC		108.337	16.1179
Son Tra			14/8/2019	D		108.307	16.0928
Son Tra			14/8/2019	D		108.307	16.0929
Son Tra			14/8/2019	D		108.307	16.0929
Son Tra	Dong Bai Bac	DBB_DR_31_G2.JPG	10/8/2019	1LC		108.312	16.1379
Son Tra	Mui Nghe	MN_DR_09_G1.JPG	11/8/2019	2LC		108.334	16.1183
Son Tra	Vung Da	BU_02_P1_G3.JPG	12/8/2019	3LC		108.322	16.116
Son Tra	Vung Da	BU_02_P1_G5.JPG	12/8/2019	3LC		108.322	16.1161
Son Tra	Vung Da	BU_02_P2_G1.JPG	12/8/2019	3LC		108.322	16.1159
Son Tra	Vung Da	BU_02_P2_G2.JPG	12/8/2019	3LC		108.322	16.116
Son Tra	Tay Bai Bac	Camera 360	9/8/2019	S		108.305	16.1247
Son Tra	Dong Bai Bac	DBB_DR_32_G2.JPG	10/8/2019	1LC		108.312	16.1379
Son Tra	Dong Bai Bac	DBB_DR_32_G4.JPG	10/8/2019	1LC		108.312	16.1379
Son Tra	Dong Bai Bac	DBB_DR_33_G1.JPG	10/8/2019	1LC		108.312	16.1379
Son Tra	Vung Da	BU_02_P2_G3.JPG	12/8/2019	3LC		108.322	16.116
Son Tra	Dong Bai Bac	DBB_DR_33_G5.JPG	10/8/2019	1LC		108.312	16.1379
Son Tra	Dong Bai Bac	DBB_DR_35_G1.JPG	10/8/2019	1LC		108.312	16.1381
Son Tra	Vung Da	BU_02_P2_G4.JPG	12/8/2019	3LC		108.322	16.116
Son Tra	Vung Da	BU_02_P2_G5.JPG	12/8/2019	3LC		108.322	16.116
Son Tra	Mui Nghe	MN_DR_13_G5.JPG	11/8/2019	2LC	4.8	108.333	16.1182
Son Tra	Vung Da	BU_02_P4_G1.JPG	12/8/2019	3LC		108.322	16.116
Son Tra	Vung Da	BU_02_P4_G2.JPG	12/8/2019	3LC		108.322	16.116
Son Tra	Vung Da	BU_02_P4_G3.JPG	12/8/2019	3LC		108.322	16.116
Son Tra	Tay Bai Bac	Camera 360	9/8/2019	S		108.304	16.1246
Son Tra	Vung Da	BU_02_P4_G4.JPG	12/8/2019	3LC		108.322	16.116
Son Tra	Vung Da	BU_02_P4_G5.JPG	12/8/2019	3LC	3.8	108.322	16.116
Son Tra	Vung Da	BU_02_P5_G1.JPG	12/8/2019	3LC		108.322	16.116
Son Tra	Vung Da Ban	Camera 360	7/8/2019	S		108.276	16.1336
Son Tra	Vung Da	BU_02_P5_G2.JPG	12/8/2019	3LC		108.322	16.116
Son Tra			14/8/2019	D		108.307	16.093
Son Tra	Vung Da	BU_02_P5_G3.JPG	12/8/2019	3LC		108.322	16.116
Son Tra	Mui Nghe	MN_DR_14_G1.JPG	11/8/2019	2LC		108.333	16.1182
Son Tra	Vung Da	BU_02_P5_G4.JPG	12/8/2019	3LC		108.322	16.116
Son Tra	Dong Bai Bac	DBB_DR_35_G3.JPG	10/8/2019	1LC		108.312	16.1381
Son Tra	Vung Da	BU_02_P5_G5.JPG	12/8/2019	3LC		108.322	16.1161
Son Tra	Huc Lo	HL_DR_36_G3.JPG	13/8/2019	HB		108.312	16.1118
Son Tra	Vung Da	BU_02_P5_G51.JPG	12/8/2019	3LC		108.322	16.1161
Son Tra	Vung Da Ban	Camera 360	7/8/2019	S		108.275	16.1337
Son Tra	Mui Nghe	MN_DR_19_G5.JPG	11/8/2019	2LC	2.9	108.332	16.1182
Son Tra	Mui Nghe	Camera 360	12/8/2019	S		108.328	16.116
Son Tra	Bai Nom	Camera 360	14/8/2019	S		108.3	16.1019
Son Tra	Huc Lo	HL_DR_36_G1.JPG	13/8/2019	HB		108.312	16.1118
Son Tra	Bai Nom	Camera 360	14/8/2019	S		108.3	16.1024
Son Tra	Mui Nghe	Camera 360	12/8/2019	S		108.328	16.1159
Son Tra	Vung Da	BU_03_P2_G5.JPG	12/8/2019	3LC		108.321	16.1162
Son Tra	Mui Nghe	Camera 360	11/8/2019	S		108.332	16.1182
Son Tra	Huc Lo	HL_DR_27_G2.JPG	13/8/2019	HB		108.312	16.1119
Son Tra	Huc Lo	HL_DR_26_G2.JPG	13/8/2019	HB		108.312	16.1118
Son Tra	Mui Nghe	Camera 360	11/8/2019	S		108.332	16.118
Son Tra	Huc Lo	HL_DR_24_G1.JPG	13/8/2019	HB		108.313	16.1118
Son Tra	Vung Da	BU_03_P4_G5.JPG	12/8/2019	3LC		108.321	16.1162
Son Tra	Huc Lo	HL_DR_20_G5.JPG	13/8/2019	HB		108.313	16.1126
Son Tra	Dong Bai Bac	DBB_DR_37_G3.JPG	10/8/2019	1LC		108.312	16.1381
Son Tra	Vung Da	BU_03_P5_G5.JPG	12/8/2019	3LC		108.321	16.1163
Son Tra	Huc Lo	HL_DR_16	13/8/2019	HB	8.2	108.313	16.1121
Son Tra	Vung Da	BU_DR_02_G1.JPG	12/8/2019	3LC		108.323	16.1159
Son Tra	Vung Da	BU_DR_02_G2.JPG	12/8/2019	3LC		108.323	16.1159
Son Tra	Vung Da	BU_DR_02_G21JPG	12/8/2019	3LC		108.323	16.1159
Son Tra	Huc Lo	HL_DR_15_G1.JPG	13/8/2019	HB		108.313	16.1121
Son Tra	Dong Bai Bac	DBB_DR_37_G4.JPG	10/8/2019	1LC		108.312	16.1381
Son Tra	Vung Da	BU_DR_02_G3.JPG	12/8/2019	3LC		108.323	16.1159
Son Tra	Vung Da	BU_DR_02_G5.JPG	12/8/2019	3LC	5.2	108.323	16.1159
Son Tra	Dong Bai Bac	DBB_DR_40_G1.JPG	10/8/2019	1LC		108.312	16.1392
Son Tra	Vung Da	BU_DR_03_G5.JPG	12/8/2019	3LC	4.5	108.323	16.1159
Son Tra	Vung Da	MN_DR_32_G2.JPG	12/8/2019	2LC		108.325	16.1156
Son Tra	Vung Da	BU_DR_04_G5.JPG	12/8/2019	3LC		108.323	16.116
Son Tra	Vung Da	BU_DR_05_G1.JPG	12/8/2019	3LC		108.322	16.1159
Son Tra	Huc Lo	HL_DR_10_G5.JPG	13/8/2019	HB	3.4	108.313	16.1121
Son Tra	Vung Da	BU_DR_07_G3.JPG	12/8/2019	3LC		108.322	16.1159
Son Tra	Vung Da	BU_DR_07_G5.JPG	12/8/2019	3LC	4.2	108.322	16.1159
Son Tra	Mui Nghe	MN_O1_P3_G2.JPG	11/8/2019	2LC		108.335	16.1182
Son Tra	Mui Nghe	MN_O2_P2_G2.JPG	11/8/2019	2LC		108.334	16.1182
Son Tra	Huc Lo	HL_DR_07_G2.JPG	13/8/2019	HB		108.314	16.112
Son Tra	Dong Bai Bac	DBB_DR_40_G2.JPG	10/8/2019	1LC		108.312	16.1392
Son Tra	Mui Nghe	MN_O2_P2_G5.JPG	11/8/2019	2LC	3.5	108.334	16.1182
Son Tra	Mui Nghe	MN_O2_P3_G2.JPG	11/8/2019	2LC		108.334	16.1182
Son Tra	Dong Bai Bac	DBB_DR_40_G3.JPG	10/8/2019	1LC		108.312	16.1392
Son Tra	Mui Nghe	MN_O2_P3_G4.JPG	11/8/2019	2LC		108.334	16.1182
Son Tra	Mui Nghe	MN_O3_P1_G2.JPG	11/8/2019	2LC	3.7	108.333	16.1183
Son Tra	Mui Nghe	MN_O3_P1_G3.JPG	11/8/2019	2LC		108.333	16.1183
Son Tra	Mui Nghe	MN_O3_P1_G5.JPG	11/8/2019	2LC	3.8	108.333	16.1183
Son Tra	Mui Nghe	MN_O3_P3_G2.JPG	11/8/2019	2LC		108.333	16.1182
Son Tra	Mui Nghe	MN_O3_P4_G3.JPG	11/8/2019	2LC		108.333	16.1182
Son Tra	Mui Nghe	MN_O3_P5_G2.JPG	11/8/2019	2LC		108.333	16.1183
Son Tra	Bai Nom	Camera 360	14/8/2019	S		108.3	16.1018
Son Tra	Vung Da	BU_DR_10_G3.JPG	12/8/2019	3LC	1.8	108.321	16.1163
Son Tra	Vung Da	BU_DR_10_G5.JPG	12/8/2019	3LC	3.1	108.321	16.1163
Son Tra	Mui Nghe	MN_O3_P5_G5.JPG	11/8/2019	2LC		108.333	16.1183
Son Tra	Dong Bai Bac	DBB_DR_40_G4.JPG	10/8/2019	1LC		108.312	16.1392
Son Tra	Vung Da	BU_DR_12_G2.JPG	12/8/2019	3LC		108.321	16.1159
Son Tra	Huc Lo	HL_06_P2	13/8/2019	HB	6.2	108.312	16.1115
Son Tra	Dong Bai Bac	DBB_O4_P5_G4.JPG	10/8/2019	HB		108.312	16.1347
Son Tra	Mui Nghe	MN_O4_P1_G1.JPG	11/8/2019	2LC		108.332	16.1181
Son Tra	Mui Nghe	MN_O4_P1_G5.JPG	11/8/2019	2LC	2.7	108.332	16.1181
Son Tra	Mui Nghe	Camera 360	12/8/2019	S		108.328	16.1159
Son Tra	Mui Nghe	MN_O4_P2_G2.JPG	11/8/2019	2LC		108.332	16.1181
Son Tra	Mui Nghe	MN_O4_P2_G3.JPG	11/8/2019	2LC		108.332	16.1182
Son Tra	Mui Nghe	MN_O4_P2_G4.JPG	11/8/2019	2LC		108.332	16.1181
Son Tra	Mui Nghe	MN_O4_P3_G5.JPG	11/8/2019	2LC	1.9	108.332	16.1182
Son Tra	Mui Nghe	MN_O4_P5_G5.JPG	11/8/2019	2LC		108.332	16.1181
Son Tra	Mui Nghe	MN_O6_P1_G2.JPG	12/8/2019	2LC		108.327	16.1155
Son Tra		Camera 360	15/8/2019	S		108.274	16.0982
Son Tra	Bai But	Camera 360	16/8/2019	S		108.272	16.0983
Son Tra	Mui Nghe	Camera 360	11/8/2019	S		108.332	16.118
Son Tra	Mui Nghe	Camera 360	11/8/2019	S		108.332	16.118
Son Tra	Mui Nghe	Camera 360	11/8/2019	S		108.332	16.118
Son Tra	Mui Nghe	Camera 360	11/8/2019	S		108.332	16.118
Son Tra	Bai But	Camera 360	16/8/2019	S		108.272	16.0982
Son Tra	Bai Nom	Camera 360	14/8/2019	S		108.299	16.1034
Son Tra	Bai But	Camera 360	16/8/2019	S		108.272	16.0981
Son Tra	Bai But	Camera 360	16/8/2019	S		108.272	16.0981
Son Tra	Vung Da	Camera 360	12/8/2019	S		108.32	16.1158
Son Tra	Vung Da	Camera 360	12/8/2019	S		108.32	16.1158
Son Tra	Vung Da	Camera 360	12/8/2019	S		108.325	16.1159
Son Tra	Vung Da	Camera 360	12/8/2019	S		108.32	16.1158
Son Tra	Dong Bai Bac	DBB_O4_P4_G3.JPG	10/8/2019	HB		108.312	16.1348
Son Tra	Vung Da	Camera 360	12/8/2019	S		108.32	16.1158
Son Tra	Dong Bai Bac	DBB_O4_P3_G5.JPG	10/8/2019	HB	4.6	108.312	16.1348
Son Tra	Vung Da	Camera 360	12/8/2019	S		108.32	16.1163
Son Tra	Vung Da	Camera 360	12/8/2019	S		108.32	16.1163
Son Tra	Vung Da	Camera 360	12/8/2019	S		108.32	16.1164
Son Tra	Vung Da	Camera 360	12/8/2019	S		108.32	16.1163
Son Tra	Vung Da	Camera 360	12/8/2019	S		108.32	16.1163
Son Tra	Vung Da	Camera 360	12/8/2019	S		108.32	16.1158
Son Tra	Dong Bai Bac	DBB_O3_P5_G5.JPG	10/8/2019	HB	4.8	108.311	16.134
Son Tra			14/8/2019	D		108.301	16.0941
Son Tra	Vung Da	Camera 360	12/8/2019	S		108.32	16.1157
Son Tra	Dong Bai Bac	DBB_O3_P4_G3.JPG	10/8/2019	HB		108.311	16.1341
Son Tra	Vung Da	Camera 360	12/8/2019	S		108.32	16.1163
Son Tra	Dong Bai Bac	DBB_O2_P5_G5.JPG	10/8/2019	HB	4.5	108.311	16.1335
Son Tra	Dong Bai Bac	DBB_O2_P5_G2.JPG	10/8/2019	HB		108.311	16.1335
Son Tra	Dong Bai Bac	DBB_DR_43_G2.JPG	10/8/2019	1LC		108.312	16.1397
Son Tra	Dong Bai Bac	DBB_DR_44_G1.JPG	10/8/2019	1LC		108.312	16.1397
Son Tra	Mui Nghe	MN_O6_P3_G3.JPG	12/8/2019	2LC		108.327	16.1156
Son Tra	Vung Da	HL5_02_P1_G5.JPG	12/8/2019	3LC	4.2	108.317	16.1132
Son Tra	Vung Da	HL5_02_P1_G51.JPG	12/8/2019	3LC	4.2	108.317	16.1132
Son Tra	Vung Da	HL5_02_P2_G5.JPG	12/8/2019	3LC	5.5	108.317	16.1131
Son Tra	Vung Da	HL5_02_P4_G5.JPG	12/8/2019	3LC	3.7	108.317	16.1132
Son Tra	Vung Da	HL5_02_P5_G5.JPG	12/8/2019	3LC	4.9	108.317	16.1132
Son Tra	Dong Bai Bac	DBB_DR_44_G51.JPG	10/8/2019	1LC		108.312	16.1397
Son Tra	Vung Da	HL5_03_P3_G5.JPG	12/8/2019	3LC	3.1	108.318	16.1137
Son Tra	Dong Bai Bac	DBB_DR_54_G4.JPG	10/8/2019	1LC		108.314	16.1429
Son Tra	Dong Bai Bac	DBB_DR_55_G2.JPG	10/8/2019	1LC		108.314	16.1429
Son Tra	Mui Nghe	MN_O6_P3_G5.JPG	12/8/2019	2LC	3.1	108.327	16.1155
Son Tra	Dong Bai Bac	DBB_O2_P3_G4.JPG	10/8/2019	HB		108.311	16.1336
Son Tra	Vung Da	MN_O8_P4_G2.JPG	12/8/2019	2LC		108.325	16.1157
Son Tra	Vung Da	Camera 360	12/8/2019	S		108.322	16.1161
Son Tra	Vung Da	Camera 360	12/8/2019	S		108.32	16.1158
Son Tra			14/8/2019	D		108.301	16.0941
Son Tra			14/8/2019	D		108.3	16.0941
Son Tra	Dong Bai Bac	DBB_O2_P3_G3.JPG	10/8/2019	HB		108.311	16.1337
Son Tra	Mui Nghe	MN_DR_02_G4.JPG	11/8/2019	3LC		108.335	16.1183
Son Tra			14/8/2019	D		108.301	16.0942
Son Tra	Dong Bai Bac	DBB_O1_P5_G4.JPG	10/8/2019	HB		108.311	16.1332
Son Tra	Mui Nghe	MN_DR_03_G5.2JPG	11/8/2019	3LC		108.335	16.1182
Son Tra	Mui Nghe	MN_DR_03_G51.JPG	11/8/2019	3LC	2.3	108.335	16.1182
Son Tra	Mui Nghe	MN_DR_03_G53.JPG	11/8/2019	3LC		108.334	16.1183
Son Tra	Dong Bai Bac	DBB_O1_P5_G1.JPG	10/8/2019	HB		108.311	16.1331
Son Tra	Mui Nghe	MN_DR_03_G54JPG	11/8/2019	3LC		108.334	16.1182
Son Tra	Dong Bai Bac	DBB_DR_55_G4.JPG	10/8/2019	1LC		108.314	16.1429
Son Tra	Dong Bai Bac	DBB_O1_P2_G5.JPG	10/8/2019	HB	4.2	108.311	16.1331
Son Tra	Dong Bai Bac	DBB_O1_P2_G4.JPG	10/8/2019	HB		108.311	16.1331
Son Tra	Vung Da	MN_O8_P5_G5.JPG	12/8/2019	2LC		108.325	16.1157
Son Tra	Bai But	Camera 360	15/8/2019	S		108.274	16.0983
Son Tra	Vung Da	Camera 360	12/8/2019	S		108.325	16.1157
Son Tra	Mui Nghe	MN_DR_03_G55.JPG	11/8/2019	3LC		108.335	16.1182
Son Tra	Mui Sung	MS_DR_O2_G2.JPG	14/8/2019	2LC		108.304	16.096
Son Tra	Dong Bai Bac	DBB_DR_55_G5.JPG	10/8/2019	1LC		108.314	16.1429
Son Tra	Dong Bai Bac	DBB_O1_P2_G3.JPG	10/8/2019	HB		108.311	16.1331
Son Tra	Vung Da	Camera 360	12/8/2019	S		108.326	16.1151
Son Tra	Mui Nghe	MN_DR_08_G5.JPG	11/8/2019	3LC	3.3	108.334	16.1183
Son Tra	Mui Sung	MS_DR_O3_G4.JPG	14/8/2019	2LC		108.306	16.0958
Son Tra	Mui Nghe	MN_DR_1	11/8/2019	3LC	3	108.335	16.1182
Son Tra	Dong Bai Bac	DBB_O1_P2_G2.JPG	10/8/2019	HB		108.311	16.1331
Son Tra	Mui Nghe	MN_DR_10_G5.JPG	11/8/2019	3LC	5.1	108.334	16.1183
Son Tra	Mui Nghe	MN_DR_11_G5.JPG	11/8/2019	3LC	5.8	108.334	16.1182
Son Tra	Mui Nghe	MN_DR_12_G2.JPG	11/8/2019	3LC		108.334	16.1182
Son Tra	Mui Nghe	MN_DR_12_G5.JPG	11/8/2019	3LC	4.1	108.334	16.1183
Son Tra	Mui Sung	MS_DR_O4_G5.JPG	14/8/2019	2LC		108.306	16.0958
Son Tra	Mui Sung	MS_O2_P2	14/8/2019	2LC	1.2	108.306	16.0958
Son Tra	Mui Nghe	MN_DR_14_G2.JPG	11/8/2019	3LC		108.333	16.1183
Son Tra	Mui Nghe	MN_DR_14_G3.JPG	11/8/2019	3LC	2.9	108.333	16.1183
Son Tra	Mui Nghe	MN_DR_15_G21.JPG	11/8/2019	3LC		108.333	16.1183
Son Tra	Mui Nghe	MN_DR_15_G41.JPG	11/8/2019	3LC		108.333	16.1182
Son Tra	Mui Nghe	MN_DR_15_G41JPG	11/8/2019	3LC		108.333	16.1182
Son Tra	Mui Nghe	MN_DR_15_G43.JPG	11/8/2019	3LC		108.333	16.1183
Son Tra	Mui Nghe	MN_DR_15_G51.JPG	11/8/2019	3LC	2.8	108.333	16.1183
Son Tra	Mui Nghe	MN_DR_16_G2.JPG	11/8/2019	3LC		108.333	16.1182
Son Tra	Mui Nghe	MN_DR_16_G5.JPG	11/8/2019	3LC	4.3	108.333	16.1181
Son Tra	Mui Nghe	MN_DR_17_G4.JPG	11/8/2019	3LC	4.7	108.333	16.1181
Son Tra	Mui Nghe	MN_DR_18_G21.JPG	11/8/2019	3LC		108.333	16.1181
Son Tra	Mui Nghe	MN_DR_18_G4.JPG	11/8/2019	3LC		108.333	16.1181
Son Tra	Mui Nghe	MN_DR_18_G5.JPG	11/8/2019	3LC	4.7	108.333	16.1182
Son Tra	Mui Sung	MS_O2_P21	14/8/2019	2LC		108.306	16.0958
Son Tra	Mui Sung	MS_O2_P3_G2.JPG	14/8/2019	2LC		108.306	16.0958
Son Tra	Dong Bai Bac	DBB_O1_P2_G1.JPG	10/8/2019	HB		108.311	16.1331
Son Tra	Dong Bai Bac	DBB_DR_60_G5.JPG	10/8/2019	1LC		108.314	16.1429
Son Tra	Dong Bai Bac	DBB_DR_61_G5.JPG	10/8/2019	1LC		108.314	16.143
Son Tra	Mui Nghe	MN_DR_24_G5.JPG	12/8/2019	3LC		108.327	16.1154
Son Tra	Dong Bai Bac	DBB_DR_63_G3.JPG	10/8/2019	HB		108.314	16.1431
Son Tra	Dong Bai Bac	DBB_DR_62_G5.JPG	10/8/2019	1LC		108.314	16.1431
Son Tra	Mui Nghe	MN_O1_P2_G2.JPG	11/8/2019	3LC		108.335	16.1181
Son Tra	Mui Sung	MS_O2_P3_G4.JPG	14/8/2019	2LC		108.306	16.0958
Son Tra	Mui Nghe	MN_O1_P2_G5.JPG	11/8/2019	3LC	2	108.335	16.1182
Son Tra	Mui Sung	MS_O2_P3_G5.JPG	14/8/2019	2LC	2.7	108.306	16.0958
Son Tra	Mui Nghe	MN_O1_P3_G4.JPG	11/8/2019	3LC		108.335	16.1182
Son Tra	Mui Gion	S_O1P2	16/8/2019	2LC		108.268	16.0951
Son Tra	Dong Bai Bac	DBB_DR_63_G4.JPG	10/8/2019	1LC		108.314	16.1431
Son Tra	Mui Nghe	MN_O1_P4_G4.JPG	11/8/2019	3LC		108.335	16.1182
Son Tra	Mui Nghe	MN_O1_P4_G5.JPG	11/8/2019	3LC	2.1	108.335	16.1182
Son Tra	Dong Bai Bac	DBB_DR_64_G3.JPG	10/8/2019	1LC		108.314	16.1432
Son Tra	Dong Bai Bac	DBB_DR_64_G4.JPG	10/8/2019	1LC		108.314	16.1431
Son Tra	Mui Nghe	MN_O1_P5_G1.JPG	11/8/2019	3LC		108.338	16.1177
Son Tra	Mui Nghe	MN_O1_P5_G12.JPG	11/8/2019	3LC	2.4	108.338	16.1176
Son Tra	Mui Nghe	MN_O1_P5_G3.JPG	11/8/2019	3LC		108.335	16.1181
Son Tra	Mui Nghe	MN_O1_P5_G5.JPG	11/8/2019	3LC	2.5	108.335	16.1182
Son Tra	Tay Bai Bac	TBB_DR_01_G3.JPG	8/8/2019	2LC		108.299	16.1271
Son Tra	Tay Bai Bac	TBB_DR_12_G5.JPG	8/8/2019	2LC		108.301	16.1253
Son Tra	Tay Bai Bac	TBB_O1_P1_G4.JPG	8/8/2019	2LC		108.299	16.1272
Son Tra	Tay Bai Bac	TBB_O1_P1_G5.JPG	8/8/2019	2LC	5.4	108.299	16.1273
Son Tra	Dong Bai Bac	DBB_DR_64_G5.JPG	10/8/2019	1LC		108.314	16.1432
Son Tra	Mui Nghe	MN_O2_P5_G1.JPG	11/8/2019	3LC	5.4	108.334	16.1182
Son Tra	Mui Nghe	MN_O2_P5_G2.JPG	11/8/2019	3LC		108.334	16.1182
Son Tra	Dong Bai Bac	DBB_DR_62_G14.JPG	10/8/2019	HB		108.314	16.143
Son Tra	Tay Bai Bac	TBB_O1_P2_G1.JPG	8/8/2019	2LC		108.299	16.1273
Son Tra	Tay Bai Bac	TBB_O1_P2_G5.JPG	8/8/2019	2LC	4.1	108.299	16.1272
Son Tra	Tay Bai Bac	TBB_O1_P4_G3.JPG	8/8/2019	2LC		108.299	16.1272
Son Tra	Mui Nghe	MN_O3_P3_G1.JPG	11/8/2019	3LC	3.9	108.333	16.1182
Son Tra	Tay Bai Bac	TBB_O2_P5_G5.JPG	8/8/2019	2LC	4	108.299	16.1262
Son Tra	Mui Nghe	MN_O3_P3_G3.JPG	11/8/2019	3LC		108.333	16.1182
Son Tra	Mui Nghe	MN_O3_P3_G41.JPG	11/8/2019	3LC		108.333	16.1181
Son Tra	Mui Nghe	MN_O3_P3_G42.JPG	11/8/2019	3LC		108.333	16.1181
Son Tra	Mui Nghe	MN_O3_P3_G43.JPG	11/8/2019	3LC		108.333	16.1181
Son Tra	Mui Nghe	MN_O3_P3_G44.JPG	11/8/2019	3LC		108.333	16.1181
Son Tra	Mui Nghe	MN_O3_P3_G5.JPG	11/8/2019	3LC	4.4	108.333	16.1182
Son Tra	Tay Bai Bac	TBB_O3_P1_G5.JPG	8/8/2019	2LC		108.3	16.1255
Son Tra	Tay Bai Bac	TBB_O3_P2_G2.JPG	8/8/2019	2LC		108.3	16.1255
Son Tra	Dong Bai Bac	DBB_O1_P1_G1.JPG	10/8/2019	1LC		108.311	16.1331
Son Tra	Tay Bai Bac	TBB_O3_P2_G5.JPG	8/8/2019	2LC		108.3	16.1255
Son Tra	Dong Bai Bac	DBB_DR_62_G13.JPG	10/8/2019	HB		108.314	16.1429
Son Tra	Tay Bai Bac	TBB_O3_P5_G4.JPG	8/8/2019	2LC		108.3	16.1255
Son Tra	Dong Bai Bac	DBB_DR_62_G12.JPG	10/8/2019	HB		108.314	16.143
Son Tra	Bai But	Camera 360	16/8/2019	S		108.272	16.0981
Son Tra	Tay Bai Bac	TBB_O3_P5_G5.JPG	8/8/2019	2LC		108.3	16.1255
Son Tra	Dong Bai Bac	DBB_DR_62_G11.JPG	10/8/2019	HB		108.314	16.1429
Son Tra	Tay Bai Bac	TBB_O4_P2_G2.JPG	8/8/2019	2LC		108.301	16.1253
Son Tra	Bai But	Camera 360	16/8/2019	S		108.271	16.0979
Son Tra	Bai Nom	Camera 360	14/8/2019	S		108.299	16.1032
Son Tra	Bai But	Camera 360	16/8/2019	S		108.272	16.0982
Son Tra	Vung Da Ban	Camera 360	7/8/2019	S		108.275	16.1337
Son Tra	Tay Bai Bac	TBB_O4_P2_G5.JPG	8/8/2019	2LC		108.301	16.1253
Son Tra	Dong Bai Bac	DBB_DR_56_G5.JPG	10/8/2019	HB	3	108.314	16.1427
Son Tra	Dong Bai Bac	DBB_DR_56_G2.JPG	10/8/2019	HB		108.314	16.1428
Son Tra	Tay Bai Bac	TBB_O4_P3_G2.JPG	8/8/2019	2LC		108.301	16.1253
Son Tra	Mui Nghe	MN_O4_P2_G5.JPG	11/8/2019	3LC	3.1	108.332	16.1178
Son Tra	Mui Nghe	MN_O4_P3_G1.JPG	11/8/2019	3LC		108.332	16.1182
Son Tra	Bai But	Camera 360	15/8/2019	S		108.273	16.0983
Son Tra	Bai But	Camera 360	16/8/2019	S		108.272	16.0982
Son Tra	Bai But	Camera 360	16/8/2019	S		108.271	16.0976
Son Tra	Bai But	Camera 360	16/8/2019	S		108.271	16.0978
Son Tra	Mui Nghe	MN_O4_P1_G4.JPG	11/8/2019	S		108.332	16.1181
Son Tra	Bai But	Camera 360	15/8/2019	S		108.273	16.0985
Son Tra	Bai But	Camera 360	16/8/2019	S		108.271	16.0977
Son Tra	Dong Bai Bac	DBB_DR_46_G4.JPG	10/8/2019	HB		108.312	16.1399
Son Tra	Tay Bai Bac	Camera 360	9/8/2019	S		108.305	16.1244
Son Tra	Bai But	Camera 360	16/8/2019	S		108.272	16.0981
Son Tra	Tay Bai Bac	TBB_O4_P3_G5.JPG	8/8/2019	2LC		108.301	16.1253
Son Tra	Mui Nghe	MN_O4_P3_G2.JPG	11/8/2019	S		108.332	16.1181
Son Tra	Dong Bai Bac	DBB_O1_P1_G2.JPG	10/8/2019	1LC		108.311	16.1332
Son Tra	Dong Bai Bac	DBB_O1_P1_G3.JPG	10/8/2019	1LC		108.311	16.1332
Son Tra	Dong Bai Bac	DBB_O1_P1_G4.JPG	10/8/2019	1LC		108.311	16.1331
Son Tra	Dong Bai Bac	DBB_O1_P5_G3.JPG	10/8/2019	1LC		108.311	16.1332
Son Tra	Dong Bai Bac	DBB_DR_39_G2.JPG	10/8/2019	HB		108.312	16.139
Son Tra	Dong Bai Bac	DBB_O2_P1_G1.JPG	10/8/2019	1LC		108.311	16.1335
Son Tra	Dong Bai Bac	DBB_O2_P1_G2.JPG	10/8/2019	1LC		108.311	16.1335
Son Tra	Dong Bai Bac	DBB_O2_P1_G3.JPG	10/8/2019	1LC		108.311	16.1335
Son Tra	Tay Bai Bac	Camera 360	9/8/2019	S		108.304	16.1246
Son Tra	Dong Bai Bac	DBB_O2_P1_G4.JPG	10/8/2019	1LC		108.311	16.1335
Son Tra	Tay Bai Bac	Camera 360	9/8/2019	S		108.304	16.125
Son Tra	Dong Bai Bac	DBB_O2_P1_G5.JPG	10/8/2019	1LC		108.311	16.1335
Son Tra	Dong Bai Bac	DBB_O2_P2_G1.JPG	10/8/2019	1LC		108.311	16.1335
Son Tra	Dong Bai Bac	DBB_O2_P2_G2.JPG	10/8/2019	1LC		108.311	16.1336
Son Tra	Dong Bai Bac	DBB_DR_36_G4.JPG	10/8/2019	HB		108.312	16.1381
Son Tra	Dong Bai Bac	DBB_O2_P2_G3.JPG	10/8/2019	1LC		108.311	16.1336
Son Tra	Dong Bai Bac	DBB_DR_31_G5.JPG	10/8/2019	HB		108.312	16.1378
Son Tra	Dong Bai Bac	DBB_O2_P2_G4.JPG	10/8/2019	1LC		108.311	16.1335
Son Tra	Tay Bai Bac	Camera 360	8/8/2019	S		108.302	16.1256
Son Tra	Tay Bai Bac	TBB5_03_P3_G4.JPG	8/8/2019	2LC		108.296	16.1315
Son Tra	Dong Bai Bac	DBB_O2_P3_G1.JPG	10/8/2019	1LC		108.311	16.1336
Son Tra	Tay Bai Bac	TBB5_DR_01_G1.JPG	8/8/2019	2LC		108.297	16.1307
Son Tra	Dong Bai Bac	DBB_O2_P5_G3.JPG	10/8/2019	1LC		108.311	16.1336
Son Tra	Dong Bai Bac	DBB_O2_P5_G4.JPG	10/8/2019	1LC		108.311	16.1335
Son Tra	Dong Bai Bac	DBB_DR_28_G4.JPG	10/8/2019	HB		108.312	16.1374
Son Tra	Dong Bai Bac	DBB_O3_P1_G3.JPG	10/8/2019	1LC		108.311	16.134
Son Tra	Dong Bai Bac	DBB_O3_P4_G1.JPG	10/8/2019	1LC		108.311	16.1341
Son Tra	Dong Bai Bac	DBB_O3_P4_G4.JPG	10/8/2019	1LC		108.311	16.1341
Son Tra	Dong Bai Bac	DBB_DR_23_G5.JPG	10/8/2019	HB		108.312	16.1369
Son Tra	Dong Bai Bac	DBB_DR_22_G4.JPG	10/8/2019	HB		108.312	16.1369
Son Tra	Dong Bai Bac	DBB_O3_P5_G2.JPG	10/8/2019	1LC		108.311	16.1341
Son Tra	Dong Bai Bac	DBB_DR_22_G3.JPG	10/8/2019	HB		108.312	16.1369
Son Tra	Dong Bai Bac	DBB_DR_11_G5.JPG	10/8/2019	HB	3.6	108.311	16.133
Son Tra	Dong Bai Bac	DBB_O3_P5_G4.JPG	10/8/2019	1LC		108.311	16.1341
Son Tra	Dong Bai Bac	DBB_DR_11_G1.JPG	10/8/2019	HB		108.311	16.133
Son Tra	Tay Bai Bac	Camera 360	8/8/2019	S		108.302	16.1255
Son Tra	Dong Bai Bac	DBB_O4_P2_G1.JPG	10/8/2019	1LC		108.312	16.1348
Son Tra	Dong Bai Bac	DBB_O4_P2_G2.JPG	10/8/2019	1LC		108.312	16.1348
Son Tra	Dong Bai Bac	DBB_O4_P2_G3.JPG	10/8/2019	1LC		108.312	16.1348
Son Tra	Tay Bai Bac	Camera 360	8/8/2019	S		108.302	16.1255
Son Tra	Bai But	Camera 360	15/8/2019	S		108.273	16.0982
Son Tra	Dong Bai Bac	DBB_O4_P3_G2.JPG	10/8/2019	1LC		108.312	16.1349
Son Tra	Dong Bai Bac	DBB_O4_P4_G1.JPG	10/8/2019	1LC		108.312	16.1347
Son Tra	Dong Bai Bac	DBB_DR_10_G1.JPG	10/8/2019	HB		108.311	16.1331
Son Tra	Tay Bai Bac	TBB5_DR_02_G5.JPG	8/8/2019	2LC	3.1	108.297	16.1306
Son Tra	Tay Bai Bac	TBB5_DR_09_G2.JPG	8/8/2019	2LC		108.296	16.1311
Son Tra	Vung Da Ban	TBB5_DR_18_G4.JPG	8/8/2019	2LC		108.288	16.137
Son Tra	Hon Sup	THS_01_P1_G5.JPG	17/8/2019	2LC		108.262	16.0899
Son Tra	Dong Bai Bac	DBB_O4_P4_G2.JPG	10/8/2019	1LC		108.312	16.1348
Son Tra	Dong Bai Bac	DBB_O4_P4_G4.JPG	10/8/2019	1LC		108.312	16.1347
Son Tra	Hon Sup	THS_01_P5_G5.JPG	17/8/2019	2LC	3.6	108.262	16.0899
Son Tra	Bai But	Camera 360	16/8/2019	S		108.272	16.0981
Son Tra	Dong Bai Bac	DBB_DR_08_G5.JPG	9/8/2019	HB	5.2	108.31	16.1323
Son Tra	Dong Bai Bac	DBB_DR_08_G1.JPG	9/8/2019	HB		108.31	16.1323
Son Tra		Camera 360	9/8/2019	S		108.31	16.1265
Son Tra		Camera 360	9/8/2019	S		108.31	16.1265
Son Tra	Bai But	Camera 360	15/8/2019	S		108.273	16.0982
Son Tra	Dong Bai Bac	DBB_DR_07_G5.JPG	9/8/2019	HB		108.31	16.1318
Son Tra	Dong Bai Bac	DBB_DR_07_G4.JPG	9/8/2019	HB		108.31	16.1318
Son Tra	Dong Bai Bac	DBB_O4_P5_G1.JPG	10/8/2019	1LC		108.312	16.1348
Son Tra			14/8/2019	D		108.301	16.0943
Son Tra	Dong Bai Bac	DBB_DR_07_G3.JPG	9/8/2019	HB		108.31	16.1318
Son Tra	Dong Bai Bac	DBB_DR_07_G2.JPG	9/8/2019	HB		108.31	16.1318
Son Tra	Huc Lo	HL_DR_03_G3.JPG	13/8/2019	1LC		108.314	16.1123
Son Tra	Huc Lo	HL_DR_04_G5.JPG	13/8/2019	1LC		108.315	16.1123
Son Tra	Huc Lo	HL_DR_21_G2.JPG	13/8/2019	1LC		108.313	16.1125
Son Tra	Dong Bai Bac	DBB_DR_07_G1.JPG	9/8/2019	HB		108.31	16.1318
Son Tra	Huc Lo	HL_DR_23_G21.JPG	13/8/2019	1LC		108.313	16.1123
Son Tra	Huc Lo	HL_DR_23_G22.JPG	13/8/2019	1LC		108.313	16.1122
Son Tra	Huc Lo	HL_DR_23_G23.JPG	13/8/2019	1LC		108.312	16.1122
Son Tra	Huc Lo	HL_DR_23_G4.JPG	13/8/2019	1LC		108.312	16.1122
Son Tra	Huc Lo	HL_DR_23_G5.JPG	13/8/2019	1LC		108.312	16.1123
Son Tra	Huc Lo	HL_DR_28_G2.JPG	13/8/2019	1LC		108.312	16.1121
Son Tra	Huc Lo	HL_DR_29_G2.JPG	13/8/2019	1LC		108.312	16.1122
Son Tra	Tay Bai Bac	TBB_DR_20_G2.JPG	8/8/2019	S		108.302	16.1254
Son Tra	Huc Lo	HL_DR_30_G4.JPG	13/8/2019	1LC		108.312	16.112
Son Tra	Huc Lo	HL_DR_31_G5.JPG	13/8/2019	1LC		108.312	16.1121
Son Tra	Huc Lo	HL_DR_34_G4.JPG	13/8/2019	1LC		108.312	16.1118
Son Tra	Dong Bai Bac	DBB_DR_06_G4.JPG	9/8/2019	HB		108.31	16.1317
Son Tra	Huc Lo	HL_DR_39_G4.JPG	13/8/2019	1LC		108.312	16.1118
Son Tra	Hon Sup	THS_05_P3_G5.JPG	17/8/2019	2LC	2.7	108.262	16.0895
Son Tra	Hon Sup	THS_09_P2_G3.JPG	17/8/2019	2LC		108.261	16.0896
Son Tra	Hon Sup	THS_09_P2_G5.JPG	17/8/2019	2LC	3.1	108.261	16.0896
Son Tra	Hon Sup	THS_09_P3_G3.JPG	17/8/2019	2LC		108.261	16.0896
Son Tra	Huc Lo	HL_DR_40_G5.JPG	13/8/2019	1LC		108.312	16.112
Son Tra	Tay Bai Bac	TBB_DR_20_G5.JPG	8/8/2019	S		108.302	16.1254
Son Tra			15/8/2019	D		108.281	16.0959
Son Tra			15/8/2019	D		108.276	16.0961
Son Tra			15/8/2019	D		108.282	16.0961
Son Tra	Huc Lo	HL_DR_44_G2.JPG	13/8/2019	1LC		108.312	16.1116
Son Tra	Huc Lo	HL_DR_45_G2.JPG	13/8/2019	1LC		108.311	16.1116
Son Tra			15/8/2019	D		108.276	16.0961
Son Tra	Huc Lo	HL_DR_46_G1.JPG	13/8/2019	1LC		108.311	16.1116
Son Tra	Huc Lo	HL_DR_55_G1.JPG	13/8/2019	1LC		108.311	16.1102
Son Tra			15/8/2019	D		108.276	16.0962
Son Tra	Huc Lo	HL_O1_P2_G4.JPG	13/8/2019	1LC		108.314	16.1121
Son Tra			15/8/2019	D		108.276	16.0962
Son Tra			15/8/2019	D		108.276	16.0962
Son Tra			15/8/2019	D		108.276	16.0962
Son Tra			15/8/2019	D		108.276	16.0962
Son Tra			15/8/2019	D		108.276	16.0962
Son Tra			15/8/2019	D		108.276	16.0962
Son Tra	Dong Bai Bac	DBB_DR_06_G1.JPG	9/8/2019	HB		108.31	16.1316
Son Tra			15/8/2019	D		108.276	16.0962
Son Tra			15/8/2019	D		108.276	16.0963
Son Tra			15/8/2019	D		108.276	16.0963
Son Tra	Dong Bai Bac	DBB_DR_02_G1.JPG	9/8/2019	HB		108.309	16.1297
Son Tra	Hon Sup	THS_09_P3_G5.JPG	17/8/2019	2LC	2.7	108.261	16.0896
Son Tra	Hon Sup	THS_11_P1_G2.JPG	17/8/2019	2LC		108.261	16.0888
Son Tra	Vung Da Ban	Camera 360	7/8/2019	S		108.275	16.1336
Son Tra	Huc Lo	HL_O1_P3_G1.JPG	13/8/2019	1LC		108.314	16.1121
Son Tra	Hon Sup	THS_11_P1_G5.JPG	17/8/2019	2LC	2.2	108.261	16.0887
Son Tra	Huc Lo	HL_O1_P3_G2.JPG	13/8/2019	1LC		108.314	16.1121
Son Tra	Hon Sup	THS_11_P2_G5.JPG	17/8/2019	2LC	2.8	108.261	16.0887
Son Tra	Dong Bai Bac	DBB_DR_01_G1.JPG	9/8/2019	HB		108.31	16.1299
Son Tra	Dong Bai Bac	DBB_07_P5_G5.JPG	10/8/2019	HB	2.6	108.312	16.1377
Son Tra	Huc Lo	HL_O1_P3_G4.JPG	13/8/2019	1LC		108.314	16.1121
Son Tra	Huc Lo	HL_O1_P5_G4.JPG	13/8/2019	1LC		108.314	16.1121
Son Tra	Dong Bai Bac	DBB_07_P5_G3.JPG	10/8/2019	HB		108.312	16.1377
Son Tra	Hon Sup	THS_11_P4_G5.JPG	17/8/2019	2LC	2.4	108.261	16.0888
Son Tra	Hon Sup	THS_12_P2_G5.JPG	17/8/2019	2LC	2.3	108.262	16.0886
Son Tra	Huc Lo	HL_O2_P1_G1.JPG	13/8/2019	1LC		108.314	16.1122
Son Tra	Hon Sup	THS_13_P1_G5.JPG	17/8/2019	2LC	2.5	108.262	16.0887
Son Tra	Hon Sup	THS_13_P2_G51.JPG	17/8/2019	2LC	2.4	108.262	16.0886
Son Tra		Camera 360	9/8/2019	S		108.307	16.1239
Son Tra	Dong Bai Bac	DBB_07_P3_G5.JPG	10/8/2019	HB		108.312	16.1378
Son Tra		Camera 360	9/8/2019	S		108.307	16.1239
Son Tra	Huc Lo	HL_O2_P1_G4.JPG	13/8/2019	1LC		108.314	16.1123
Son Tra	Huc Lo	HL_O2_P3_G4.JPG	13/8/2019	1LC		108.314	16.1123
Son Tra	Hon Sup	THS_13_P3_G5.JPG	17/8/2019	2LC	2.3	108.262	16.0886
Son Tra	Huc Lo	HL_O2_P5_G2.JPG	13/8/2019	1LC		108.314	16.1122
Son Tra	Hon Sup	THS_13_P4_G5.JPG	17/8/2019	2LC	2.3	108.262	16.0886
Son Tra	Hon Sup	THS_13_P5_G5.JPG	17/8/2019	2LC	2.4	108.262	16.0886
Son Tra		Camera 360	13/8/2019	S		108.31	16.1015
Son Tra	Hon Sup	THS_15_P2_G5.JPG	17/8/2019	2LC	3.3	108.261	16.0894
Son Tra	Bai But	Camera 360	16/8/2019	S		108.271	16.0979
Son Tra	Hon Sup	THS_16_P1_G4.JPG	17/8/2019	2LC		108.261	16.0899
Son Tra	Huc Lo	HL_O4_P1_G2.JPG	13/8/2019	1LC		108.313	16.1121
Son Tra	Vung Da	HL5_DR_14_G2.JPG	12/8/2019	3LC		108.318	16.1137
Son Tra	Huc Lo	HL_O4_P4_G4.JPG	13/8/2019	1LC		108.312	16.1121
Son Tra	Huc Lo	HL_O5_P1_G3.JPG	13/8/2019	1LC		108.312	16.112
Son Tra	Huc Lo	HL_O5_P1_G4.JPG	13/8/2019	1LC		108.312	16.112
Son Tra		Camera 360	9/8/2019	S		108.31	16.1263
Son Tra	Hon Sup	THS_16_P2_G1.JPG	17/8/2019	2LC		108.261	16.0899
Son Tra	Huc Lo	HL_O5_P4_G1.JPG	13/8/2019	1LC		108.312	16.1119
Son Tra	Huc Lo	HL_O5_P4_G2.JPG	13/8/2019	1LC		108.312	16.112
Son Tra	Huc Lo	HL_O5_P4_G3.JPG	13/8/2019	1LC		108.312	16.112
Son Tra		Camera 360	9/8/2019	S		108.31	16.1263
Son Tra	Bai Nom	Camera 360	14/8/2019	S		108.3	16.1014
Son Tra	Dong Bai Bac	DBB_06_P3_G3.JPG	10/8/2019	HB		108.312	16.1376
Son Tra	Dong Bai Bac	DBB_06_P2_G4.JPG	10/8/2019	HB		108.312	16.1375
Son Tra	Huc Lo	HL_O5_P4_G4.JPG	13/8/2019	1LC		108.312	16.1119
Son Tra	Vung Da	HL5_DR_14_G4.JPG	12/8/2019	3LC		108.318	16.1142
Son Tra	Huc Lo	HL_O5_P5_G3.JPG	13/8/2019	1LC		108.312	16.112
Son Tra	Huc Lo	HL_O5_P5_G4.JPG	13/8/2019	1LC		108.312	16.112
Son Tra	Vung Da	HL5_01_P5_G2.JPG	12/8/2019	1LC		108.317	16.1127
Son Tra	Vung Da	HL5_03_P5_G2.JPG	12/8/2019	1LC		108.317	16.1135
Son Tra	Hon Sup	THS_16_P2_G3.JPG	17/8/2019	2LC		108.261	16.0898
Son Tra	Hon Sup	THS_16_P2_G5.JPG	17/8/2019	2LC	3.7	108.261	16.0898
Son Tra	Hon Sup	THS_16_P5_G5.JPG	17/8/2019	2LC		108.261	16.0898
Son Tra	Vung Da	HL5_DR_01_G2.JPG	12/8/2019	1LC		108.316	16.1124
Son Tra	Dong Bai Bac	DBB_06_P1_G3.JPG	10/8/2019	HB		108.312	16.1375
Son Tra	Dong Bai Bac	DBB_05_P5_G2.JPG	10/8/2019	HB	3.4	108.312	16.1371
Son Tra	Vung Da	HL5_DR_13_G1.JPG	12/8/2019	1LC		108.317	16.1136
Son Tra	Huc Lo	HL7_01_P1_G4.JPG	13/8/2019	1LC		108.31	16.1046
Son Tra	Huc Lo	HL7_01_P2_G1.JPG	13/8/2019	1LC		108.31	16.1045
Son Tra	Dong Bai Bac	DBB_05_P3_G5.JPG	10/8/2019	HB		108.312	16.1371
Son Tra	Bai But	Camera 360	16/8/2019	S		108.271	16.0979
Son Tra	Hon Sup	THS_17_P1_G1.JPG	17/8/2019	2LC		108.26	16.0894
Son Tra	Mui Nghe	MN_O4_P5_G1.JPG	11/8/2019	S		108.332	16.1181
Son Tra	Huc Lo	HL7_01_P4_G2.JPG	13/8/2019	1LC		108.31	16.1047
Son Tra	Huc Lo	HL7_01_P4_G3.JPG	13/8/2019	1LC		108.31	16.1047
Son Tra	Huc Lo	Camera 360	13/8/2019	HB		108.31	16.1084
Son Tra	Mui Nghe	MN_O4_P5_G2.JPG	11/8/2019	S		108.332	16.1181
Son Tra	Hon Sup	THS_17_P3_G3.JPG	17/8/2019	2LC		108.26	16.0896
Son Tra	Huc Lo	HL7_01_P4_G4.JPG	13/8/2019	1LC		108.31	16.1046
Son Tra	Huc Lo	HL7_03_P1_G2.JPG	13/8/2019	1LC		108.309	16.1056
Son Tra	Huc Lo	Camera 360	13/8/2019	HB		108.31	16.1084
Son Tra	Huc Lo	HL7_03_P1_G4.JPG	13/8/2019	1LC		108.309	16.1055
Son Tra	Huc Lo	Camera 360	13/8/2019	HB		108.31	16.1083
Son Tra	Huc Lo	HL7_03_P2_G3.JPG	13/8/2019	1LC		108.309	16.1056
Son Tra	Huc Lo	Camera 360	13/8/2019	HB		108.31	16.1084
Son Tra	Bai But	Camera 360	16/8/2019	S		108.271	16.0978
Son Tra	Huc Lo	Camera 360	13/8/2019	HB		108.31	16.1083
Son Tra	Bai But	Camera 360	16/8/2019	S		108.271	16.0978
Son Tra	Vung Da Ban	Camera 360	7/8/2019	S		108.275	16.1336
Son Tra	Huc Lo	HL7_03_P2_G4.JPG	13/8/2019	1LC		108.309	16.1055
Son Tra	Huc Lo	HL7_03_P4_G1.JPG	13/8/2019	1LC		108.31	16.1054
Son Tra	Huc Lo	HL7_03_P4_G2.JPG	13/8/2019	1LC		108.31	16.1055
Son Tra		Camera 360	13/8/2019	S		108.31	16.1018
Son Tra	Huc Lo	HL7_03_P4_G3.JPG	13/8/2019	1LC		108.31	16.1054
Son Tra	Huc Lo	HL7_03_P5_G2.JPG	13/8/2019	1LC		108.31	16.1055
Son Tra	Hon Sup	THS_17_P4_G1.JPG	17/8/2019	2LC		108.26	16.0896
Son Tra	Bai But	Camera 360	16/8/2019	S		108.271	16.0977
Son Tra	Bai But	Camera 360	16/8/2019	S		108.271	16.0978
Son Tra		Camera 360	9/8/2019	S		108.31	16.1262
Son Tra	Hon Sup	THS_17_P4_G11.JPG	17/8/2019	2LC		108.26	16.0895
Son Tra	Huc Lo	HL7_03_P5_G3.JPG	13/8/2019	1LC		108.31	16.1055
Son Tra	Huc Lo	HL7_03_P5_G4.JPG	13/8/2019	1LC		108.309	16.1055
Son Tra	Huc Lo	HL7_DR_01_G3.JPG	13/8/2019	1LC		108.31	16.1042
Son Tra	Huc Lo	HL7_DR_02_G1.JPG	13/8/2019	1LC		108.31	16.1042
Son Tra	Huc Lo	HL7_DR_02_G2.JPG	13/8/2019	1LC		108.31	16.1042
Son Tra	Mui Nghe	Camera 360	11/8/2019	HB		108.332	16.1183
Son Tra	Mui Nghe	Camera 360	11/8/2019	HB		108.335	16.1184
Son Tra	Hon Sup	THS_17_P4_G12.JPG	17/8/2019	2LC		108.26	16.0896
Son Tra	Huc Lo	HL7_DR_02_G3.JPG	13/8/2019	1LC		108.31	16.1042
Son Tra	Huc Lo	HL7_DR_02_G4.JPG	13/8/2019	1LC		108.31	16.1042
Son Tra	Huc Lo	HL7_DR_03_G2.JPG	13/8/2019	1LC		108.31	16.1041
Son Tra		Camera 360	9/8/2019	S		108.31	16.1262
Son Tra	Hon Sup	THS_17_P4_G12.JPG	17/8/2019	2LC		108.26	16.0895
Son Tra	Hon Sup	THS_18_P4	17/8/2019	2LC	4.7	108.261	16.0891
Son Tra	Hon Sup	THS_18_P41	17/8/2019	2LC		108.261	16.089
Son Tra	Hon Sup	THS_18_P42	17/8/2019	2LC	4.7	108.261	16.0891
Son Tra	Hon Sup	THS_19_P5_G3.JPG	17/8/2019	2LC		108.262	16.0889
Son Tra	Hon Sup	THS_20_P1_G3.JPG	17/8/2019	2LC		108.262	16.0883
Son Tra	Hon Sup	THS_20_P1_G51.JPG	17/8/2019	2LC	3.4	108.262	16.0883
Son Tra	Mui Nghe	Camera 360	11/8/2019	HB		108.333	16.1185
Son Tra	Huc Lo	HL7_DR_03_G4.JPG	13/8/2019	1LC		108.31	16.1041
Son Tra	Mui Nghe	Camera 360	11/8/2019	HB		108.335	16.1182
Son Tra	Vung Da Ban	Camera 360	7/8/2019	S		108.276	16.134
Son Tra	Vung Da Ban	Camera 360	7/8/2019	S		108.276	16.1341
Son Tra	Vung Da Ban	Camera 360	8/8/2019	S		108.285	16.1376
Son Tra	Vung Da	Camera 360	12/8/2019	HB		108.321	16.1166
Son Tra	Huc Lo	HL7_DR_05_G1.JPG	13/8/2019	1LC		108.31	16.1043
Son Tra	Huc Lo	HL7_DR_05_G2.JPG	13/8/2019	1LC		108.31	16.1044
Son Tra	Huc Lo	HL7_DR_05_G3.JPG	13/8/2019	1LC		108.31	16.1044
Son Tra	Huc Lo	HL7_DR_05_G4.JPG	13/8/2019	1LC		108.31	16.1043
Son Tra	Huc Lo	HL7_DR_10_G2.JPG	13/8/2019	1LC		108.309	16.1049
Son Tra	Huc Lo	HL7_DR_10_G4.JPG	13/8/2019	1LC		108.31	16.102
Son Tra	Huc Lo	HL7_DR_11_G1.JPG	13/8/2019	1LC		108.31	16.1049
Son Tra	Huc Lo	HL7_DR_11_G2.JPG	13/8/2019	1LC		108.31	16.1049
Son Tra	Huc Lo	HL7_DR_11_G3.JPG	13/8/2019	1LC		108.31	16.105
Son Tra	Huc Lo	HL7_DR_11_G4.JPG	13/8/2019	1LC		108.31	16.1049
Son Tra	Huc Lo	HL7_DR_12_G4.JPG	13/8/2019	1LC		108.31	16.1049
Son Tra	Huc Lo	HL7_DR_13_G2.JPG	13/8/2019	1LC		108.31	16.1052
Son Tra	Huc Lo	HL7_DR_13_G4.JPG	13/8/2019	1LC		108.31	16.1051
Son Tra	Huc Lo	HL7_DR_14_G3.JPG	13/8/2019	1LC		108.31	16.1051
Son Tra	Huc Lo	HL7_DR_17_G2.JPG	13/8/2019	1LC		108.309	16.1054
Son Tra	Huc Lo	HL7_DR_25_G1.JPG	13/8/2019	1LC		108.31	16.1054
Son Tra		Camera 360	13/8/2019	S		108.31	16.1017
Son Tra	Vung Da	Camera 360	12/8/2019	HB		108.325	16.1158
Son Tra	Vung Da	Camera 360	12/8/2019	HB		108.326	16.1154
Son Tra	Huc Lo	HL7_DR_25_G3.JPG	13/8/2019	1LC		108.31	16.1055
Son Tra	Vung Da	Camera 360	12/8/2019	HB		108.324	16.1157
Son Tra	Vung Da	Camera 360	12/8/2019	HB		108.322	16.1162
Son Tra	Dong Bai Bac	DBB_DR_36_G5.JPG	10/8/2019	S		108.312	16.1381
Son Tra	Huc Lo	HL7_DR_25_G4.JPG	13/8/2019	1LC		108.309	16.1054
Son Tra	Mui Nghe	Camera 360	11/8/2019	HB		108.336	16.118
Son Tra	Huc Lo	HL7_DR_27_G3.JPG	13/8/2019	1LC		108.31	16.1053
Son Tra	Mui Nghe	MN_O4_P5_G4.JPG	11/8/2019	S		108.332	16.118
Son Tra	Mui Gion	MG_O2P10	16/8/2019	1LC		108.269	16.0953
Son Tra	Hon Sup	THS_20_P1_G52.JPG	17/8/2019	2LC		108.262	16.0883
Son Tra	Mui Nghe	Camera 360	11/8/2019	HB		108.338	16.1176
Son Tra	Mui Nghe	MN_DR_28_G2.JPG	12/8/2019	1LC		108.326	16.1153
Son Tra	Hon Sup	THS_20_P1_G53.JPG	17/8/2019	2LC		108.262	16.0883
Son Tra	Hon Sup	THS_20_P2_G1.JPG	17/8/2019	2LC		108.262	16.0883
Son Tra	Hon Sup	THS_20_P2_G3.JPG	17/8/2019	2LC		108.262	16.0883
Son Tra	Vung Da Ban	Camera 360	7/8/2019	HB		108.275	16.1335
Son Tra	Vung Da Ban	Camera 360	7/8/2019	HB		108.276	16.1341
Son Tra	Bai But	Camera 360	15/8/2019	HB		108.273	16.0974
Son Tra	Hon Sup	THS_20_P2_G5.JPG	17/8/2019	2LC	4.8	108.262	16.0883
Son Tra	Bai But	Camera 360	15/8/2019	HB	1.8	108.277	16.0973
Son Tra	Bai Nom	Camera 360	14/8/2019	HB		108.3	16.1015
Son Tra	Bai Nom	Camera 360	14/8/2019	HB		108.3	16.1014
Son Tra	Vung Da	MN_DR_29_G1.JPG	12/8/2019	1LC		108.326	16.1152
Son Tra		Camera 360	14/8/2019	HB		108.31	16.0977
Son Tra	Dong Bai Bac	Camera 360	10/8/2019	HB		108.312	16.1377
Son Tra	Vung Da	MN_DR_35_G1.JPG	12/8/2019	1LC		108.326	16.1157
Son Tra	Mui Sung	MS_DR_O8_G5.JPG	14/8/2019	1LC		108.307	16.0957
Son Tra	Dong Bai Bac	DBB_DR_36_G5.JPG	10/8/2019	S		108.312	16.1381
Son Tra	Bai But	Camera 360	16/8/2019	S		108.272	16.0982
Son Tra	Mui Sung	MS_O1_P1_G1.JPG	14/8/2019	1LC		108.305	16.0958
Son Tra	Mui Sung	MS_O1_P3_G4.JPG	14/8/2019	1LC		108.305	16.0957
Son Tra	Mui Sung	MS_O2_P5_G5.JPG	14/8/2019	1LC		108.306	16.0958
Son Tra		MS_O3P1	16/8/2019	1LC		108.27	16.0964
Son Tra		Camera 360	13/8/2019	S		108.31	16.1017
Son Tra	Hon Sup	THS_20_P3_G5.JPG	17/8/2019	2LC	4.3	108.262	16.0883
Son Tra	Mui Gion	NS_O1P3	16/8/2019	1LC		108.269	16.0954
Son Tra	Hon Sup	THS_20_P4_G5.JPG	17/8/2019	2LC	3.2	108.262	16.0884
Son Tra	Tay Bai Bac	TBB_DR_02_G2.JPG	8/8/2019	1LC		108.299	16.1269
Son Tra	Tay Bai Bac	TBB_DR_03_G1.JPG	8/8/2019	1LC		108.299	16.1266
Son Tra	Tay Bai Bac	TBB_DR_04_G2.JPG	8/8/2019	1LC		108.299	16.1265
Son Tra	Tay Bai Bac	TBB_DR_04_G4.JPG	8/8/2019	1LC		108.299	16.1266
Son Tra	Tay Bai Bac	TBB_DR_05_G1.JPG	8/8/2019	1LC		108.3	16.1262
Son Tra	Tay Bai Bac	TBB_DR_07_G5.JPG	8/8/2019	1LC		108.3	16.1258
Son Tra	Tay Bai Bac	TBB_DR_09_G5.JPG	8/8/2019	1LC		108.3	16.1254
Son Tra	Tay Bai Bac	TBB_DR_10_G1.JPG	8/8/2019	1LC		108.301	16.1252
Son Tra	Tay Bai Bac	TBB_DR_11_G2.JPG	8/8/2019	1LC		108.301	16.1253
Son Tra	Bai But	Camera 360	15/8/2019	S		108.273	16.0984
Son Tra	Tay Bai Bac	TBB_DR_13_G5.JPG	8/8/2019	1LC		108.301	16.1254
Son Tra	Tay Bai Bac	TBB_DR_15_G2.JPG	8/8/2019	1LC		108.302	16.1254
Son Tra	Tay Bai Bac	TBB_DR_16_G2.JPG	8/8/2019	1LC		108.302	16.1253
Son Tra	Dong Bai Bac	Camera 360	10/8/2019	HB		108.312	16.1383
Son Tra	Tay Bai Bac	TBB_DR_16_G5.JPG	8/8/2019	1LC		108.302	16.1252
Son Tra	Tay Bai Bac	TBB_DR_21_G1.JPG	8/8/2019	1LC		108.302	16.1252
Son Tra	Tay Bai Bac	TBB_DR_21_G11.JPG	8/8/2019	1LC		108.302	16.1252
Son Tra	Tay Bai Bac	TBB_DR_21_G2.JPG	8/8/2019	1LC		108.302	16.1252
Son Tra	Tay Bai Bac	TBB_DR_21_G3.JPG	8/8/2019	1LC		108.302	16.1252
Son Tra	Tay Bai Bac	TBB_DR_21_G5.JPG	8/8/2019	1LC		108.302	16.1252
Son Tra	Tay Bai Bac	TBB_O1_P3_G3.JPG	8/8/2019	1LC		108.299	16.1272
Son Tra	Tay Bai Bac	TBB_O1_P4_G5.JPG	8/8/2019	1LC		108.299	16.1272
Son Tra	Tay Bai Bac	TBB_O1_P5_G2.JPG	8/8/2019	1LC		108.299	16.1272
Son Tra		Camera 360	9/8/2019	S		108.307	16.1244
Son Tra	Dong Bai Bac	Camera 360	10/8/2019	HB		108.311	16.1334
Son Tra	Tay Bai Bac	TBB_O2_P1_G2.JPG	8/8/2019	1LC		108.3	16.1263
Son Tra	Tay Bai Bac	TBB_O2_P1_G3.JPG	8/8/2019	1LC		108.3	16.1263
Son Tra	Hon Sup	THS_20_P5_G1.JPG	17/8/2019	2LC		108.262	16.0883
Son Tra	Tay Bai Bac	TBB_O2_P2_G5.JPG	8/8/2019	1LC		108.3	16.1262
Son Tra	Hon Sup	THS_20_P5_G5.JPG	17/8/2019	2LC	3.7	108.262	16.0883
Son Tra	Hon Sup	THS_21_P1_G2.JPG	17/8/2019	2LC		108.262	16.0884
Son Tra	Hon Sup	THS_21_P1_G3.JPG	17/8/2019	2LC		108.262	16.0884
Son Tra		Camera 360	9/8/2019	S		108.31	16.1264
Son Tra	Hon Sup	THS_21_P1_G5.JPG	17/8/2019	2LC	3	108.262	16.0886
Son Tra	Dong Bai Bac	Camera 360	10/8/2019	HB		108.311	16.1334
Son Tra	Tay Bai Bac	TBB_O2_P3_G2.JPG	8/8/2019	1LC		108.3	16.1263
Son Tra		Camera 360	9/8/2019	S		108.31	16.1264
Son Tra	Hon Sup	THS_21_P2_G3.JPG	17/8/2019	2LC		108.262	16.0887
Son Tra	Hon Sup	THS_21_P2_G5.JPG	17/8/2019	2LC	3.3	108.262	16.0884
Son Tra	Hon Sup	THS_21_P3_G2.JPG	17/8/2019	2LC		108.262	16.0884
Son Tra	Tay Bai Bac	TBB_O2_P3_G3.JPG	8/8/2019	1LC		108.3	16.1263
Son Tra	Hon Sup	THS_21_P3_G3.JPG	17/8/2019	2LC		108.262	16.0884
Son Tra	Tay Bai Bac	TBB_O2_P3_G5.JPG	8/8/2019	1LC		108.3	16.1263
Son Tra	Dong Bai Bac	Camera 360	10/8/2019	HB		108.313	16.1358
Son Tra	Dong Bai Bac	Camera 360	10/8/2019	HB		108.311	16.1327
Son Tra	Tay Bai Bac	TBB_O2_P4_G1.JPG	8/8/2019	1LC		108.3	16.1263
Son Tra	Tay Bai Bac	TBB_O2_P5_G3.JPG	8/8/2019	1LC		108.3	16.1263
Son Tra	Tay Bai Bac	TBB_O3_P4_G3.JPG	8/8/2019	1LC		108.3	16.1255
Son Tra	Vung Da	MN_DR_30_G1.JPG	12/8/2019	3LC		108.326	16.1152
Son Tra	Bai But	Camera 360	15/8/2019	S		108.273	16.0983
Son Tra	Dong Bai Bac	Camera 360	10/8/2019	HB		108.312	16.1362
Son Tra	Tay Bai Bac	TBB_O4_P1_G1.JPG	8/8/2019	1LC		108.301	16.1254
Son Tra	Bai But	Camera 360	15/8/2019	S		108.273	16.0981
Son Tra	Dong Bai Bac	Camera 360	9/8/2019	HB		108.309	16.1293
Son Tra	Hon Sup	THS_21_P3_G5.JPG	17/8/2019	2LC	3.7	108.262	16.0884
Son Tra	Tay Bai Bac	TBB_O4_P1_G3.JPG	8/8/2019	1LC		108.301	16.1254
Son Tra	Tay Bai Bac	TBB_O4_P1_G5.JPG	8/8/2019	1LC		108.301	16.1254
Son Tra	Dong Bai Bac	Camera 360	10/8/2019	HB		108.312	16.1363
Son Tra	Tay Bai Bac	TBB_O4_P4_G2.JPG	8/8/2019	1LC		108.301	16.1255
Son Tra	Hon Sup	THS_21_P4	17/8/2019	2LC	3.5	108.262	16.0884
Son Tra	Hon Sup	THS_21_P5_G2.JPG	17/8/2019	2LC		108.262	16.0884
Son Tra	Tay Bai Bac	TBB_O4_P5_G2.JPG	8/8/2019	1LC		108.301	16.1254
Son Tra	Tay Bai Bac	TBB_O4_P5_G5.JPG	8/8/2019	1LC		108.301	16.1254
Son Tra	Tay Bai Bac	TBB5_02_P5_G1.JPG	8/8/2019	1LC		108.296	16.131
Son Tra	Tay Bai Bac	TBB5_DR_04_G5.JPG	8/8/2019	1LC		108.296	16.1309
Son Tra	Hon Sup	THS_21_P5_G4.JPG	17/8/2019	2LC		108.262	16.0884
Son Tra	Tay Bai Bac	TBB5_DR_11_G1.JPG	8/8/2019	1LC		108.296	16.1312
Son Tra	Tay Bai Bac	TBB5_DR_15_G1.JPG	8/8/2019	1LC		108.296	16.1313
Son Tra	Tay Bai Bac	TBB5_DR_17_G1.JPG	8/8/2019	1LC		108.296	16.1313
Son Tra	Tay Bai Bac	TBB5_DR_22_G1.JPG	8/8/2019	1LC		108.296	16.1317
Son Tra	Tay Bai Bac	TBB5_DR_25_G3.JPG	8/8/2019	1LC		108.295	16.1318
Son Tra	Tay Bai Bac	TBB5_DR_25_G4.JPG	8/8/2019	1LC		108.295	16.1318
Son Tra	Hon Sup	THS_07_P5_G5.JPG	17/8/2019	1LC		108.261	16.09
Son Tra	Hon Sup	THS_07_P5_G53.JPG	17/8/2019	1LC		108.261	16.09
Son Tra	Hon Sup	THS_16_P3_G2.JPG	17/8/2019	1LC		108.261	16.0897
Son Tra			13/8/2019	D		108.314	16.1019
Son Tra			13/8/2019	D		108.314	16.102
Son Tra	Hon Sup	THS_21_P5_G5.JPG	17/8/2019	2LC	3.8	108.262	16.0884
Son Tra			11/8/2019	D		108.332	16.1129
Son Tra			11/8/2019	D		108.332	16.113
Son Tra			11/8/2019	D		108.332	16.1131
Son Tra			11/8/2019	D		108.334	16.1138
Son Tra			12/8/2019	D		108.32	16.1151
Son Tra			12/8/2019	D		108.32	16.1152
Son Tra			12/8/2019	D		108.321	16.1152
Son Tra			11/8/2019	D		108.336	16.1164
Son Tra			9/8/2019	D		108.304	16.1294
Son Tra			9/8/2019	D		108.304	16.1294
Son Tra	Dong Bai Bac	Camera 360	10/8/2019	HB		108.314	16.143
Son Tra	Bai But	Camera 360	16/8/2019	S		108.271	16.0979
Son Tra			9/8/2019	D		108.304	16.1294
Son Tra		Camera 360	16/8/2019	S		108.27	16.0973
Son Tra	Hon Sup	THS_22_P1_G3.JPG	17/8/2019	2LC		108.262	16.0882
Son Tra			9/8/2019	D		108.304	16.1296
Son Tra	Hon Sup	THS_16_P3_G4.JPG	17/8/2019	1LC		108.261	16.0897
Son Tra			9/8/2019	D		108.304	16.1297
Son Tra	Hon Sup	THS_16_P5_G2.JPG	17/8/2019	1LC		108.261	16.0897
Son Tra	Hon Sup	THS_16_P5_G4.JPG	17/8/2019	1LC		108.261	16.0898
Son Tra	Hon Sup	THS_17_P1_G3.JPG	17/8/2019	1LC		108.26	16.0895
Son Tra	Bai But	Camera 360	15/8/2019	HB		108.273	16.0982
Son Tra	Vung Da	BU_DR_13	12/8/2019	HB	7.8	108.321	16.1159
Son Tra	Hon Sup	THS_17_P2_G3.JPG	17/8/2019	1LC		108.26	16.0895
Son Tra	Bai But	Camera 360	16/8/2019	S		108.271	16.0978
Son Tra		Camera 360	9/8/2019	S		108.31	16.1264
Son Tra	Hon Sup	THS_17_P3_G1.JPG	17/8/2019	1LC		108.26	16.0895
Son Tra		Camera 360	9/8/2019	S		108.31	16.1264
Son Tra	Hon Sup	THS_19_P4_G1.JPG	17/8/2019	1LC		108.262	16.0887
Son Tra	Hon Sup	THS_DR_04_G52.JPG	17/8/2019	1LC		108.262	16.0897
Son Tra	Hon Sup	THS_DR_08_G5.JPG	17/8/2019	1LC		108.263	16.0888
Son Tra	Hon Sup	THS_DR_13_G5.JPG	17/8/2019	1LC		108.262	16.0901
Son Tra	Hon Sup	THS_DR_20_G4.JPG	17/8/2019	1LC		108.261	16.0889
Son Tra	Vung Da	BU_DR_06_G3.JPG	12/8/2019	HB		108.322	16.1159
Son Tra	Bai Nom	Camera 360	14/8/2019	S		108.3	16.1032
Son Tra	Vung Da	BU_03_P3_G5.JPG	12/8/2019	HB		108.321	16.1165
Son Tra	Hon Sup	THS_DR_22_G5.JPG	17/8/2019	1LC		108.261	16.0887
Son Tra	Hon Sup	THS_DR_22_G51.JPG	17/8/2019	1LC		108.261	16.0886
Son Tra	Hon Sup	THS_22_P1_G5.JPG	17/8/2019	2LC	4.6	108.262	16.0882
Son Tra	Hon Sup	THS_DR_22_G53.JPG	17/8/2019	1LC		108.261	16.0886
Son Tra	Bai But	Camera 360	16/8/2019	S		108.271	16.0976
Son Tra	Hon Sup	THS_DR_22_G54.JPG	17/8/2019	1LC		108.261	16.0887
Son Tra	Hon Sup	THS_DR_27_G4.JPG	17/8/2019	1LC		108.261	16.0891
Son Tra	Hon Sup	THS_DR_34_G1.JPG	17/8/2019	1LC		108.261	16.09
Son Tra	Hon Sup	THS_22_P2_G3.JPG	17/8/2019	2LC	4.4	108.262	16.0882
Son Tra	Hon Sup	THS_22_P3_G5.JPG	17/8/2019	2LC	4	108.262	16.0882
Son Tra	Hon Sup	THS_DR_34_G3.JPG	17/8/2019	1LC		108.261	16.0901
Son Tra	Hon Sup	THS_DR_35_G1.JPG	17/8/2019	1LC		108.261	16.0898
Son Tra	Bai Nom	BN_O9_P4_G3.JPG	14/8/2019	HB		108.3	16.1006
Son Tra	Hon Sup	THS_DR_35_G4.JPG	17/8/2019	1LC		108.261	16.0898
Son Tra	Bai Nom	BN_O9_P4_G1.JPG	14/8/2019	HB		108.3	16.1006
Son Tra	Hon Sup	THS_DR_35_G41.JPG	17/8/2019	1LC		108.261	16.0897
Son Tra	Hon Sup	THS_DR_35_G42.JPG	17/8/2019	1LC		108.261	16.0898
Son Tra	Hon Sup	THS_DR_35_G43.JPG	17/8/2019	1LC		108.261	16.0898
Son Tra	Bai But	Camera 360	16/8/2019	S		108.271	16.0976
Son Tra	Bai But	Camera 360	15/8/2019	S		108.273	16.0982
Son Tra	Bai But	Camera 360	16/8/2019	S		108.271	16.0976
Son Tra	Bai Nom	BN_O8_P3_G5.JPG	14/8/2019	HB	1	108.3	16.1009
Son Tra			9/8/2019	D		108.304	16.1297
Son Tra	Hon Sup	THS_DR_37_G3.JPG	17/8/2019	1LC		108.26	16.0893
Son Tra	Hon Sup	THS_DR_37_G5.JPG	17/8/2019	1LC		108.26	16.0893
Son Tra	Hon Sup	THS_DR_37_G5.JPG	17/8/2019	1LC		108.26	16.0894
Son Tra	Hon Sup	THS_DR_37_G52.JPG	17/8/2019	1LC		108.26	16.0893
Son Tra	Hon Sup	THS_DR_45_G3.JPG	17/8/2019	1LC		108.261	16.0884
Son Tra	Vung Da Ban	VCB_03_P1_G1.JPG	7/8/2019	1LC		108.277	16.1349
Son Tra	Bai Nom	BN_O2_P2_G5.JPG	14/8/2019	HB		108.301	16.0987
Son Tra	Vung Da Ban	VCB_03_P2_G2.JPG	7/8/2019	1LC		108.277	16.1348
Son Tra	Bai Nom	BN_O1_P1_G5.JPG	14/8/2019	HB		108.3	16.0989
Son Tra	Vung Da Ban	VCB_03_P2_G3.JPG	7/8/2019	1LC		108.277	16.1348
Son Tra	Vung Da Ban	VCB_03_P2_G4.JPG	7/8/2019	1LC		108.277	16.1348
Son Tra	Vung Da Ban	VCB_03_P3_G1.JPG	7/8/2019	1LC		108.277	16.1349
Son Tra	Bai Nom	BN_DR_99_G2.JPG	14/8/2019	HB		108.3	16.0994
Son Tra	Hon Sup	THS_22_P4_G5.JPG	17/8/2019	2LC	5.2	108.262	16.0883
Son Tra	Bai Nom	BN_DR_90_G5.JPG	14/8/2019	HB		108.3	16.1002
Son Tra	Bai Nom	BN_DR_88_G6.JPG	14/8/2019	HB		108.3	16.1
Son Tra	Bai Nom	BN_DR_86_G5.JPG	14/8/2019	HB		108.3	16.1002
Son Tra	Vung Da Ban	VCB_03_P4_G4.JPG	7/8/2019	1LC		108.277	16.1349
Son Tra	Bai Nom	BN_DR_86_G2.JPG	14/8/2019	HB		108.3	16.0999
Son Tra	Vung Da Ban	VCB_04_P1_G2.JPG	7/8/2019	1LC		108.277	16.1352
Son Tra	Vung Da Ban	VCB_04_P1_G3.JPG	7/8/2019	1LC		108.277	16.1352
Son Tra	Vung Da Ban	VCB_04_P1_G4.JPG	7/8/2019	1LC		108.277	16.1352
Son Tra	Bai Nom	BN_DR_84_G3.JPG	14/8/2019	HB		108.3	16.1004
Son Tra	Vung Da Ban	VCB_04_P2_G1.JPG	7/8/2019	1LC		108.277	16.1352
Son Tra	Vung Da Ban	VCB_04_P2_G2.JPG	7/8/2019	1LC		108.277	16.1353
Son Tra	Hon Sup	THS_22_P5_G5.JPG	17/8/2019	2LC		108.262	16.0882
Son Tra	Bai Nom	BN_DR_80_G65JPG	14/8/2019	HB		108.3	16.1006
Son Tra	Vung Da Ban	VCB_04_P2_G4.JPG	7/8/2019	1LC		108.277	16.1352
Son Tra	Vung Da Ban	VCB_04_P2_G5.JPG	7/8/2019	1LC		108.277	16.1352
Son Tra	Bai Nom	BN_DR_80_G64JPG	14/8/2019	HB		108.3	16.1005
Son Tra	Dong Bai Bac	DBB_DR_08_G2.JPG	9/8/2019	S		108.31	16.1323
Son Tra	Hon Sup	THS_DR_03_G5.JPG	17/8/2019	2LC	4	108.262	16.0899
Son Tra	Hon Sup	THS_DR_11_G5.JPG	17/8/2019	2LC	3.7	108.262	16.0899
Son Tra	Hon Sup	THS_DR_19_G5.JPG	17/8/2019	2LC	2.4	108.261	16.089
Son Tra	Vung Da Ban	VCB_04_P3_G2.JPG	7/8/2019	1LC		108.277	16.1354
Son Tra	Hon Sup	THS_DR_21_G5.JPG	17/8/2019	2LC	2.2	108.261	16.0887
Son Tra	Hon Sup	THS_DR_23_G5.JPG	17/8/2019	2LC	2.3	108.262	16.0887
Son Tra	Bai Nom	BN_DR_80_G63.JPG	14/8/2019	HB		108.3	16.1006
Son Tra	Vung Da Ban	VCB_04_P5_G3.JPG	7/8/2019	1LC		108.277	16.1352
Son Tra	Hon Sup	THS_DR_24_G5.JPG	17/8/2019	2LC	2.3	108.262	16.0886
Son Tra	Vung Da Ban	VCB_DR_07_G2.JPG	7/8/2019	1LC		108.276	16.1346
Son Tra	Vung Da Ban	VCB_DR_13_G1.JPG	7/8/2019	1LC		108.277	16.1347
Son Tra	Vung Da Ban	VCB_DR_15_G1.JPG	7/8/2019	1LC		108.277	16.135
Son Tra	Vung Da Ban	VCB_DR_15_G2.JPG	7/8/2019	1LC		108.277	16.135
Son Tra	Vung Da Ban	VCB_DR_15_G3.JPG	7/8/2019	1LC		108.277	16.135
Son Tra	Vung Da Ban	VCB_DR_15_G4.JPG	7/8/2019	1LC		108.277	16.135
Son Tra	Vung Da Ban	VCB_DR_15_G5.JPG	7/8/2019	1LC		108.277	16.135
Son Tra	Bai Nom	BN_DR_80_G61JPG	14/8/2019	HB		108.3	16.1006
Son Tra	Bai But	Camera 360	16/8/2019	S		108.271	16.0978
Son Tra	Vung Da Ban	VCB_DR_16_G2.JPG	7/8/2019	1LC		108.277	16.1351
Son Tra	Bai Nom	BN_DR_80_G26.JPG	14/8/2019	HB		108.3	16.1007
Son Tra	Hon Sup	THS_DR_25_G3.JPG	17/8/2019	2LC		108.261	16.0888
Son Tra	Hon Sup	THS_DR_25_G5.JPG	17/8/2019	2LC	3.4	108.261	16.0888
Son Tra	Hon Sup	THS_DR_25_G51.JPG	17/8/2019	2LC		108.261	16.0888
Son Tra	Hon Sup	THS_DR_25_G52.JPG	17/8/2019	2LC		108.261	16.0888
Son Tra	Vung Da Ban	VCB_DR_16_G3.JPG	7/8/2019	1LC		108.277	16.1352
Son Tra	Bai Nom	BN_DR_71_G5.JPG	14/8/2019	HB	1.3	108.3	16.1011
Son Tra		Camera 360	16/8/2019	S		108.27	16.0962
Son Tra	Hon Sup	THS_DR_26_G5.JPG	17/8/2019	2LC	3.1	108.261	16.0888
Son Tra	Hon Sup	THS_DR_28_G1.JPG	17/8/2019	2LC		108.261	16.0896
Son Tra		Camera 360	9/8/2019	S		108.307	16.1243
Son Tra	Hon Sup	THS_DR_38_G3.JPG	17/8/2019	2LC		108.261	16.0891
Son Tra	Hon Sup	THS_DR_38_G5.JPG	17/8/2019	2LC	3	108.261	16.0891
Son Tra	Hon Sup	THS_DR_42_G5.JPG	17/8/2019	2LC	2.9	108.262	16.0884
Son Tra	Hon Sup	THS_DR_43_G2.JPG	17/8/2019	2LC		108.262	16.0884
Son Tra	Hon Sup	THS_DR_43_G3.JPG	17/8/2019	2LC		108.262	16.0884
Son Tra	Hon Sup	THS_DR_43_G5.JPG	17/8/2019	2LC	3.5	108.262	16.0884
Son Tra	Hon Sup	THS_DR_44_G1.JPG	17/8/2019	2LC		108.262	16.0884
Son Tra	Hon Sup	THS_DR_44_G4.JPG	17/8/2019	2LC	3.5	108.262	16.0884
Son Tra	Hon Sup	THS_DR_46_G5.JPG	17/8/2019	2LC	4.9	108.261	16.0884
Son Tra	Vung Da Ban	VCB_DR_17_G2.JPG	7/8/2019	1LC		108.274	16.134
Son Tra	Vung Da Ban	VCB_DR_17_G3.JPG	7/8/2019	1LC		108.274	16.134
Son Tra	Vung Da Ban	VCB_DR_17_G4.JPG	7/8/2019	1LC		108.274	16.134
Son Tra	Vung Da Ban	VCB_DR_17_G51.JPG	7/8/2019	1LC		108.274	16.134
Son Tra	Vung Da Ban	VCB4_01_P3_G1.JPG	7/8/2019	1LC		108.27	16.1389
Son Tra		Camera 360	13/8/2019	S		108.31	16.1016
Son Tra	Bai Nom	Camera 360	14/8/2019	S		108.299	16.1034
Son Tra	Bai But	Camera 360	16/8/2019	S		108.271	16.0974
Son Tra	Vung Da Ban	VCB4_01_P3_G2.JPG	7/8/2019	1LC		108.27	16.1389
Son Tra	Vung Da Ban	VCB4_01_P3_G3.JPG	7/8/2019	1LC		108.269	16.1389
Son Tra	Hon Sup	THS_DR_47	17/8/2019	2LC	5.7	108.261	16.0884
Son Tra	Vung Da Ban	VCB4_01_P3_G4.JPG	7/8/2019	1LC		108.269	16.1389
Son Tra	Vung Da Ban	VCB4_02_P1_G1.JPG	7/8/2019	1LC		108.27	16.1386
Son Tra	Hon Sup	THS_DR_49_G5.JPG	17/8/2019	2LC		108.261	16.0882
Son Tra	Bai Nom	BN_DR_67_G5.JPG	14/8/2019	HB		108.3	16.1011
Son Tra	Hon Sup	THS_DR_49_G51.JPG	17/8/2019	2LC		108.261	16.0882
Son Tra	Vung Da Ban	VCB4_02_P1_G2.JPG	7/8/2019	1LC		108.27	16.1386
Son Tra	Vung Da Ban	VCB4_02_P1_G3.JPG	7/8/2019	1LC		108.27	16.1386
Son Tra	Vung Da Ban	VCB4_02_P1_G4.JPG	7/8/2019	1LC		108.27	16.1386
Son Tra	Vung Da Ban	VCB4_02_P2_G1.JPG	7/8/2019	1LC		108.27	16.1386
Son Tra	Vung Da Ban	VCB4_02_P2_G4.JPG	7/8/2019	1LC		108.27	16.1386
Son Tra	Vung Da Ban	VCB4_02_P3_G1.JPG	7/8/2019	1LC		108.27	16.1385
Son Tra		Camera 360	16/8/2019	S		108.27	16.0971
Son Tra	Vung Da Ban	VCB4_02_P4_G2.JPG	7/8/2019	1LC		108.27	16.1385
Son Tra	Vung Da Ban	VCB4_02_P5_G3.JPG	7/8/2019	1LC		108.27	16.1385
Son Tra	Hon Sup	THS_DR_49_G52.JPG	17/8/2019	2LC		108.261	16.0882
Son Tra		Camera 360	9/8/2019	S		108.307	16.1249
Son Tra	Hon Sup	THS_DR_49_G52.JPG	17/8/2019	2LC		108.261	16.0882
Son Tra	Bai Nom	BN_DR_65_G2.JPG	14/8/2019	HB		108.3	16.1011
Son Tra	Vung Da Ban	VCB4_03_P1_G1.JPG	7/8/2019	1LC		108.27	16.1375
Son Tra	Hon Sup	THS_DR_50_G.JPG	17/8/2019	2LC		108.262	16.0883
Son Tra	Bai Nom	BN_DR_58_G5.JPG	14/8/2019	HB	1.7	108.299	16.1016
Son Tra	Vung Da Ban	VCB4_03_P1_G2.JPG	7/8/2019	1LC		108.27	16.1376
Son Tra	Bai Nom	BN_DR_53_G5.JPG	14/8/2019	HB	2.5	108.299	16.1016
Son Tra	Hon Sup	THS_DR_50_G5.JPG	17/8/2019	2LC	5	108.261	16.0882
Son Tra	Vung Da Ban	VCB_01_P2_G5.JPG	7/8/2019	2LC	2.1	108.276	16.1342
Son Tra	Vung Da Ban	VCB_01_P3_G5.JPG	7/8/2019	2LC	2.1	108.276	16.1343
Son Tra	Vung Da Ban	VCB_01_P4_G5.JPG	7/8/2019	2LC	1.7	108.277	16.1342
Son Tra	Vung Da Ban	VCB_01_P5_G5.JPG	7/8/2019	2LC	2.2	108.276	16.1342
Son Tra	Vung Da Ban	VCB4_03_P1_G3.JPG	7/8/2019	1LC		108.27	16.1376
Son Tra	Vung Da Ban	VCB_02_P1_G5.JPG	7/8/2019	2LC	2.9	108.277	16.1345
Son Tra	Vung Da Ban	VCB4_03_P1_G4.JPG	7/8/2019	1LC		108.27	16.1375
Son Tra	Vung Da Ban	VCB_02_P4_G5.JPG	7/8/2019	2LC	3	108.277	16.1346
Son Tra	Vung Da Ban	VCB_DR_01_G5.JPG	7/8/2019	2LC	2.9	108.276	16.134
Son Tra	Vung Da Ban	VCB_DR_02_G5.JPG	7/8/2019	2LC	1.9	108.276	16.134
Son Tra	Vung Da Ban	VCB_DR_04_G1.JPG	7/8/2019	2LC		108.276	16.1342
Son Tra	Vung Da Ban	VCB_DR_09_G5.JPG	7/8/2019	2LC		108.277	16.1345
Son Tra	Vung Da Ban	VCB_DR_14_G1.JPG	7/8/2019	2LC		108.277	16.1349
Son Tra	Vung Da Ban	VCB_DR_14_G5.JPG	7/8/2019	2LC	1.8	108.277	16.1349
Son Tra	Vung Da Ban	VCB4_01_P1_G5.JPG	7/8/2019	2LC	2	108.269	16.1389
Son Tra	Vung Da Ban	VCB4_01_P4_G5.JPG	7/8/2019	2LC	1.9	108.269	16.1389
Son Tra	Vung Da Ban	VCB4_03_P2_G1.JPG	7/8/2019	1LC		108.27	16.1375
Son Tra	Vung Da Ban	VCB4_01_P5_G5.JPG	7/8/2019	2LC	2.4	108.269	16.1389
Son Tra	Vung Da Ban	VCB4_DR_05_G1.JPG	7/8/2019	2LC		108.269	16.1389
Son Tra	Vung Da Ban	VCB4_03_P2_G2.JPG	7/8/2019	1LC		108.27	16.1375
Son Tra	Vung Da Ban	VCB4_DR_05_G5.JPG	7/8/2019	2LC	2.9	108.269	16.1389
Son Tra	Vung Da Ban	VCB4_03_P4_G1.JPG	7/8/2019	1LC		108.27	16.1376
Son Tra	Vung Da Ban	VCB4_DR_18_G1.JPG	7/8/2019	2LC		108.27	16.1374
Son Tra	Vung Da Ban	VCB4_03_P4_G2.JPG	7/8/2019	1LC		108.27	16.1376
[truncated: 178 more rows]
